# Supplementary material for: Endemic diversity and distribution of the Iranian vascular flora across phytogeographical regions, biodiversity hotspots and areas of endemism
Source: PubMed Central journal article supplement (PMC6737179; doi:10.1038/s41598-019-49417-1), 2019-09-10
Supplement: 41598_2019_49417_MOESM1_ESM.pdf [file 41598_2019_49417_MOESM1_ESM.pdf]

## Electronic Supplementary Material

Article title: **Endemic diversity and distribution of the Iranian vascular flora across phytogeographical regions, biodiversity hotspots and areas of endemism**

Jalil Noroozi<sup>1\*</sup>, Amir Talebi<sup>2</sup>, Moslem Doostmohammadi<sup>2</sup>, Sara Manafzadeh<sup>1</sup>, Zahra Asgarpour<sup>1</sup>, Gerald M. Schneeweiss<sup>1</sup>

<sup>1</sup>Department of Botany and Biodiversity Research, University of Vienna, Vienna, Austria.

<sup>2</sup>Department of Plant Science, University of Tehran, Tehran, Iran.

\*Correspondence: [jalil.noroozi@univie.ac.at](mailto:jalil.noroozi@univie.ac.at)

Table S1. A total of 2,597 endemic vascular plant species of Iran, their presence in three phytogeographical regions and in five areas of endemism, their life forms, and range-restricted species. Species without entry in the column "Areas of endemism" are found exclusively outside any of the five areas of endemism.

| Nr | Species                                                        | Family         | Phytogeographic region | Area of endemism | Life form   | Range-restricted sp. |
|----|----------------------------------------------------------------|----------------|------------------------|------------------|-------------|----------------------|
| 1  | <i>Acantholimon acmostegium</i> Boiss. & Buhse                 | Plumbaginaceae | Irano-Turanian         | Al, Ko           | Chamaephyte | NO                   |
| 2  | <i>Acantholimon alavae</i> Rech.f. & Schiman-Czeika            | Plumbaginaceae | Irano-Turanian         | Ko               | Chamaephyte | YES                  |
| 3  | <i>Acantholimon albocalycinum</i> Assadi & Mirtadz.            | Plumbaginaceae | Irano-Turanian         | Ke               | Chamaephyte | YES                  |
| 4  | <i>Acantholimon aspadanum</i> Bunge                            | Plumbaginaceae | Irano-Turanian         | Za               | Chamaephyte | NO                   |
| 5  | <i>Acantholimon asphodelinum</i> Mobayen                       | Plumbaginaceae | Irano-Turanian         | Za               | Chamaephyte | NO                   |
| 6  | <i>Acantholimon atropatanum</i> Bunge                          | Plumbaginaceae | Irano-Turanian         | Az               | Chamaephyte | NO                   |
| 7  | <i>Acantholimon austro-iranicum</i> Rech.f. & Schiman-Czeika   | Plumbaginaceae | Irano-Turanian         | Ke               | Chamaephyte | NO                   |
| 8  | <i>Acantholimon bakhtiaticum</i> Assadi                        | Plumbaginaceae | Irano-Turanian         | Za               | Chamaephyte | YES                  |
| 9  | <i>Acantholimon bodeanum</i> Bunge                             | Plumbaginaceae | Irano-Turanian         | Al, Ko           | Chamaephyte | NO                   |
| 10 | <i>Acantholimon brachystachyum</i> Boiss. ex Bunge             | Plumbaginaceae | Irano-Turanian         | Al, Za           | Chamaephyte | NO                   |
| 11 | <i>Acantholimon bromifolium</i> Boiss. ex Bunge                | Plumbaginaceae | Irano-Turanian         | Za               | Chamaephyte | NO                   |
| 12 | <i>Acantholimon cephalotoides</i> Rech.f.                      | Plumbaginaceae | Irano-Turanian         | Al               | Chamaephyte | NO                   |
| 13 | <i>Acantholimon chlorostegium</i> Rech.f. & Schiman-Czeika     | Plumbaginaceae | Irano-Turanian         | Ke               | Chamaephyte | NO                   |
| 14 | <i>Acantholimon collare</i> Köie & Rech.f.                     | Plumbaginaceae | Irano-Turanian         | Al, Lo           | Chamaephyte | NO                   |
| 15 | <i>Acantholimon cupreo-olivascens</i> Rech.f. & Schiman-Czeika | Plumbaginaceae | Irano-Turanian         | Ke               | Chamaephyte | YES                  |
| 16 | <i>Acantholimon curviflorum</i> Bunge                          | Plumbaginaceae | Irano-Turanian         | Za               | Chamaephyte | NO                   |
| 17 | <i>Acantholimon cymosum</i> Bunge                              | Plumbaginaceae | Irano-Turanian         | Al               | Chamaephyte | YES                  |
| 18 | <i>Acantholimon demaventicum</i> Bormm.                        | Plumbaginaceae | Irano-Turanian         | Al               | Chamaephyte | NO                   |
| 19 | <i>Acantholimon densiflorum</i> Assadi                         | Plumbaginaceae | Irano-Turanian         | Az               | Chamaephyte | YES                  |
| 20 | <i>Acantholimon eschkerense</i> Boiss. & Hausskn.              | Plumbaginaceae | Irano-Turanian         | Za               | Chamaephyte | NO                   |
| 21 | <i>Acantholimon festucaceum</i> (Jaub. & Spach) Boiss.         | Plumbaginaceae | Irano-Turanian         | Al, Za, Az       | Chamaephyte | NO                   |
| 22 | <i>Acantholimon flabellum</i> Assadi                           | Plumbaginaceae | Irano-Turanian         | Za, Ko           | Chamaephyte | YES                  |
| 23 | <i>Acantholimon flexuosum</i> Boiss. & Hausskn. ex Bunge       | Plumbaginaceae | Irano-Turanian         | Al, Za, Ke       | Chamaephyte | NO                   |
| 24 | <i>Acantholimon gadukense</i> Mobayen                          | Plumbaginaceae | Irano-Turanian         | Al               | Chamaephyte | YES                  |

|    |                                                                    |                |                |                |             |     |
|----|--------------------------------------------------------------------|----------------|----------------|----------------|-------------|-----|
| 25 | <i>Acantholimon gilliatii</i> Turrill                              | Plumbaginaceae | Irano-Turanian | Al, Az         | Chamaephyte | NO  |
| 26 | <i>Acantholimon glabratum</i> Assadi                               | Plumbaginaceae | Irano-Turanian | Za             | Chamaephyte | YES |
| 27 | <i>Acantholimon gorganense</i> Mobayen                             | Plumbaginaceae | Irano-Turanian | Ko             | Chamaephyte | NO  |
| 28 | <i>Acantholimon gulistanum</i> Bunge                               | Plumbaginaceae | Irano-Turanian | Ko             | Chamaephyte | YES |
| 29 | <i>Acantholimon haesarensis</i> Bornm. ex Rech.f. & Schiman-Czeika | Plumbaginaceae | Irano-Turanian | Ke             | Chamaephyte | YES |
| 30 | <i>Acantholimon hormozganense</i> Assadi                           | Plumbaginaceae | Saharo-Sindian | Ke             | Chamaephyte | YES |
| 31 | <i>Acantholimon horridum</i> Bunge                                 | Plumbaginaceae | Irano-Turanian | Ke             | Chamaephyte | YES |
| 32 | <i>Acantholimon hystrix</i> Stapf                                  | Plumbaginaceae | Irano-Turanian | Za             | Chamaephyte | YES |
| 33 | <i>Acantholimon incomptum</i> Boiss. & Buhse                       | Plumbaginaceae | Irano-Turanian | Al, Ke, Lo     | Chamaephyte | NO  |
| 34 | <i>Acantholimon kermanense</i> Assadi & Mirtadz.                   | Plumbaginaceae | Irano-Turanian | Ke             | Chamaephyte | NO  |
| 35 | <i>Acantholimon melananthum</i> Boiss.                             | Plumbaginaceae | Irano-Turanian | Za             | Chamaephyte | NO  |
| 36 | <i>Acantholimon mirtadzadinii</i> Assadi                           | Plumbaginaceae | Irano-Turanian | Ke             | Chamaephyte | YES |
| 37 | <i>Acantholimon mishaudaghense</i> Mobayen                         | Plumbaginaceae | Irano-Turanian | Az             | Chamaephyte | YES |
| 38 | <i>Acantholimon mobayenii</i> Assadi & Ghahr.                      | Plumbaginaceae | Irano-Turanian | Za             | Chamaephyte | YES |
| 39 | <i>Acantholimon modestum</i> Bornm. ex Rech.f. & Schiman-Czeika    | Plumbaginaceae | Irano-Turanian | Ke             | Chamaephyte | NO  |
| 40 | <i>Acantholimon moradii</i> Assadi                                 | Plumbaginaceae | Irano-Turanian | Za             | Chamaephyte | YES |
| 41 | <i>Acantholimon nigricans</i> Mobayen                              | Plumbaginaceae | Irano-Turanian | Za, Ke         | Chamaephyte | YES |
| 42 | <i>Acantholimon oliganthum</i> Boiss.                              | Plumbaginaceae | Irano-Turanian | Za, Ke         | Chamaephyte | NO  |
| 43 | <i>Acantholimon olivieri</i> (Jaub. & Spach) Boiss.                | Plumbaginaceae | Irano-Turanian | Za             | Chamaephyte | NO  |
| 44 | <i>Acantholimon ophiocladus</i> Rech.f. & Schiman-Czeika           | Plumbaginaceae | Irano-Turanian | Al, Za         | Chamaephyte | YES |
| 45 | <i>Acantholimon pterostegium</i> Bunge                             | Plumbaginaceae | Irano-Turanian | Ko             | Chamaephyte | NO  |
| 46 | <i>Acantholimon quinquelobum</i> Bunge                             | Plumbaginaceae | Irano-Turanian | Al, Ko         | Chamaephyte | NO  |
| 47 | <i>Acantholimon restiaceum</i> Bunge                               | Plumbaginaceae | Irano-Turanian | Ko             | Chamaephyte | NO  |
| 48 | <i>Acantholimon rhodopolium</i> Rech.f. & Schiman-Czeika           | Plumbaginaceae | Irano-Turanian | Za             | Chamaephyte | YES |
| 49 | <i>Acantholimon scabellum</i> Boiss. & Hausskn.                    | Plumbaginaceae | Irano-Turanian | Za             | Chamaephyte | NO  |
| 50 | <i>Acantholimon schahrudicum</i> Bunge                             | Plumbaginaceae | Irano-Turanian | Al, Za, Ke     | Chamaephyte | NO  |
| 51 | <i>Acantholimon schirazianum</i> Boiss.                            | Plumbaginaceae | Irano-Turanian | Za             | Chamaephyte | YES |
| 52 | <i>Acantholimon scirpinum</i> Bunge                                | Plumbaginaceae | Irano-Turanian | Ke             | Chamaephyte | NO  |
| 53 | <i>Acantholimon scorpius</i> (Jaub. & Spach) Boiss.                | Plumbaginaceae | Irano-Turanian | Al, Za, Ke, Az | Chamaephyte | NO  |
| 54 | <i>Acantholimon senganense</i> Bunge                               | Plumbaginaceae | Irano-Turanian | Al             | Chamaephyte | YES |
| 55 | <i>Acantholimon serotinum</i> Rech.f. & Schiman-Czeika             | Plumbaginaceae | Irano-Turanian | Za, Ke         | Chamaephyte | NO  |

|    |                                                           |                 |                                   |                |                 |     |
|----|-----------------------------------------------------------|-----------------|-----------------------------------|----------------|-----------------|-----|
| 56 | <i>Acantholimon sirschense</i> Assadi & Mirtadz.          | Plumbaginaceae  | Irano-Turanian                    | Ke             | Chamaephyte     | YES |
| 57 | <i>Acantholimon spinicalyx</i> Köie & Rech.f.             | Plumbaginaceae  | Irano-Turanian                    | Ko, Ke         | Chamaephyte     | NO  |
| 58 | <i>Acantholimon talagonicum</i> Boiss.                    | Plumbaginaceae  | Irano-Turanian                    | Al, Za         | Chamaephyte     | NO  |
| 59 | <i>Acantholimon termei</i> Rech.f. & Schiman-Czeika       | Plumbaginaceae  | Irano-Turanian                    | Al             | Chamaephyte     | YES |
| 60 | <i>Acantholimon tomentellum</i> Boiss.                    | Plumbaginaceae  | Irano-Turanian                    | Za             | Chamaephyte     | NO  |
| 61 | <i>Acantholimon tragacanthinum</i> (Jaub. & Spach) Boiss. | Plumbaginaceae  | Irano-Turanian                    | Az             | Chamaephyte     | YES |
| 62 | <i>Acantholimon viscidulum</i> Boiss.                     | Plumbaginaceae  | Irano-Turanian                    |                | Chamaephyte     | YES |
| 63 | <i>Acantholimon wendelboi</i> Rech.f. & Schiman-Czeika    | Plumbaginaceae  | Irano-Turanian                    | Za             | Chamaephyte     | NO  |
| 64 | <i>Acantholimon wilhelminae</i> Rech.f. & Schiman-Czeika  | Plumbaginaceae  | Irano-Turanian                    | Az             | Chamaephyte     | YES |
| 65 | <i>Acantholimon zaeifii</i> Assadi                        | Plumbaginaceae  | Irano-Turanian                    | Ke             | Chamaephyte     | NO  |
| 66 | <i>Acanthophyllum andersenii</i> Schiman-Czeika           | Caryophyllaceae | Irano-Turanian                    | Ko             | Chamaephyte     | YES |
| 67 | <i>Acanthophyllum chloroleucum</i> Rech.f. & Aell.        | Caryophyllaceae | Irano-Turanian                    | Ko             | Chamaephyte     | YES |
| 68 | <i>Acanthophyllum crassifolium</i> Boiss.                 | Caryophyllaceae | Irano-Turanian                    | Al, Za, Az     | Chamaephyte     | NO  |
| 69 | <i>Acanthophyllum ejtehadii</i> Mahmoudi & Vaezi          | Caryophyllaceae | Irano-Turanian                    | Ko             | Chamaephyte     | YES |
| 70 | <i>Acanthophyllum leucostegium</i> Schiman-Czeika         | Caryophyllaceae | Irano-Turanian,<br>Saharo-Sindian | Za, Ke         | Chamaephyte     | NO  |
| 71 | <i>Acanthophyllum pachycephalum</i> Schiman-Czeika        | Caryophyllaceae | Irano-Turanian                    | Al, Za, Ko     | Chamaephyte     | NO  |
| 72 | <i>Acanthophyllum yasamin-nassehiae</i> Joharchi & Pirani | Caryophyllaceae | Irano-Turanian                    | Ko             | Chamaephyte     | YES |
| 73 | <i>Acer mazandaranicum</i> Amini, H.Zare & Assadi         | Aceraceae       | Euro-Siberian                     | Al             | Phanerophyte    | YES |
| 74 | <i>Achillea aucheri</i> Boiss.                            | Asteraceae      | Irano-Turanian                    | Al, Az         | Hemicryptophyte | NO  |
| 75 | <i>Achillea callichroa</i> Boiss.                         | Asteraceae      | Irano-Turanian                    | Za             | Hemicryptophyte | YES |
| 76 | <i>Achillea eriophora</i> DC.                             | Asteraceae      | Irano-Turanian,<br>Saharo-Sindian | Za, Ke         | Hemicryptophyte | NO  |
| 77 | <i>Achillea kellalensis</i> Boiss. & Hausskn.             | Asteraceae      | Irano-Turanian                    | Za             | Hemicryptophyte | YES |
| 78 | <i>Achillea oxyodonta</i> Boiss.                          | Asteraceae      | Irano-Turanian                    | Al, Za         | Hemicryptophyte | NO  |
| 79 | <i>Achillea pachycephala</i> Rech.f.                      | Asteraceae      | Irano-Turanian,<br>Euro-Siberian  | Ko, Al         | Hemicryptophyte | NO  |
| 80 | <i>Achillea talagonica</i> Boiss.                         | Asteraceae      | Irano-Turanian                    | Al, Za, Az, Ke | Hemicryptophyte | NO  |
| 81 | <i>Aconitum iranshahrii</i> Riedl                         | Ranunculaceae   | Irano-Turanian                    | Al             | Geophyte        | YES |
| 82 | <i>Adonis globosa</i> C.H.Steinb. ex Rech.f.              | Ranunculaceae   | Irano-Turanian                    | Za             | Hemicryptophyte | NO  |
| 83 | <i>Aeluropus laciniatus</i> Khodash.                      | Poaceae         | Irano-Turanian                    | Ko             | Geophyte        | YES |
| 84 | <i>Aeluropus peterganicus</i> Khodash.                    | Poaceae         | Irano-Turanian                    |                | Geophyte        | YES |

|     |                                                            |                  |                |                |                 |     |
|-----|------------------------------------------------------------|------------------|----------------|----------------|-----------------|-----|
| 85  | <i>Aethionema cephalanthum</i> (Bornm.) Bornm.             | Brassicaceae     | Irano-Turanian | Za             | Hemicryptophyte | YES |
| 86  | <i>Aethionema sabzevaricum</i> Khosravi & Joharchi         | Brassicaceae     | Irano-Turanian |                | Hemicryptophyte | YES |
| 87  | <i>Aethionema semnanensis</i> Mozaff.                      | Brassicaceae     | Irano-Turanian | Al             | Chamaephyte     | YES |
| 88  | <i>Aethionema stenopterum</i> Boiss.                       | Brassicaceae     | Irano-Turanian | Al, Za         | Hemicryptophyte | NO  |
| 89  | <i>Aethionema umbellatum</i> (Boiss.) Bornm.               | Brassicaceae     | Irano-Turanian | Za, Ke         | Hemicryptophyte | NO  |
| 90  | <i>Agropyron afghanicum</i> Melderis                       | Poaceae          | Irano-Turanian | Za             | Hemicryptophyte | YES |
| 91  | <i>Agropyron brachyphyllum</i> Boiss. & Hausskn. ex Boiss. | Poaceae          | Irano-Turanian | Za             | Hemicryptophyte | YES |
| 92  | <i>Agropyron bulbosum</i> Boiss.                           | Poaceae          | Irano-Turanian | Al             | Hemicryptophyte | YES |
| 93  | <i>Agropyron gentryi</i> Melderis                          | Poaceae          | Irano-Turanian | Za             | Hemicryptophyte | YES |
| 94  | <i>Agrostis gariana</i> Taheri                             | Poaceae          | Irano-Turanian | Za             | Hemicryptophyte | YES |
| 95  | <i>Ajuga chamaecistus</i> Ging. ex Benth.                  | Lamiaceae        | Irano-Turanian | Al, Za, Ke, Az | Chamaephyte     | NO  |
| 96  | <i>Ajuga saxicola</i> Assadi & Jamzad                      | Lamiaceae        | Saharo-Sindian |                | Chamaephyte     | YES |
| 97  | <i>Albraunia foveopilosa</i> Speta                         | Scrophulariaceae | Saharo-Sindian |                | Therophyte      | NO  |
| 98  | <i>Alcea arbelensis</i> Boiss. & Hausskn.                  | Malvaceae        | Irano-Turanian | Al, Az         | Hemicryptophyte | NO  |
| 99  | <i>Alcea assadii</i> Pakravan                              | Malvaceae        | Irano-Turanian | Az             | Hemicryptophyte | YES |
| 100 | <i>Alcea flavovirens</i> (Boiss. & Buhse) Iljin            | Malvaceae        | Irano-Turanian | Az, Za         | Hemicryptophyte | NO  |
| 101 | <i>Alcea ghahremanii</i> Pakravan & Assadi                 | Malvaceae        | Irano-Turanian | Az             | Hemicryptophyte | YES |
| 102 | <i>Alcea glabrata</i> Alef.                                | Malvaceae        | Irano-Turanian | Al, Az, Za     | Hemicryptophyte | NO  |
| 103 | <i>Alcea gorganica</i> (Rech.f., Aellen & Esfand.) Zohary  | Malvaceae        | Euro-Siberian  | Al             | Hemicryptophyte | NO  |
| 104 | <i>Alcea ilamica</i> Pakravan                              | Malvaceae        | Saharo-Sindian |                | Hemicryptophyte | YES |
| 105 | <i>Alcea iranshahrii</i> Pakravan, Ghahr. & Assadi         | Malvaceae        | Irano-Turanian | Za             | Hemicryptophyte | YES |
| 106 | <i>Alcea koelzii</i> Riedl                                 | Malvaceae        | Irano-Turanian | Az, Za         | Hemicryptophyte | NO  |
| 107 | <i>Alcea kurdica</i> Alef.                                 | Malvaceae        | Irano-Turanian | Az, Za         | Hemicryptophyte | NO  |
| 108 | <i>Alcea lenkoranica</i> Iljin                             | Malvaceae        | Euro-Siberian  | Al, Lo         | Hemicryptophyte | YES |
| 109 | <i>Alcea loftusii</i> (Baker f.) Zohary                    | Malvaceae        | Saharo-Sindian |                | Hemicryptophyte | YES |
| 110 | <i>Alcea mazandaranica</i> Pakravan & Ghahr.               | Malvaceae        | Euro-Siberian  | Al             | Hemicryptophyte | YES |
| 111 | <i>Alcea mozaffarianii</i> Ghahr., Pakravan & Assadi       | Malvaceae        | Irano-Turanian | Az             | Hemicryptophyte | YES |
| 112 | <i>Alcea persarum</i> Bornm.                               | Malvaceae        | Irano-Turanian | Za, Ko, Ke     | Hemicryptophyte | YES |
| 113 | <i>Alcea schirazana</i> Alef.                              | Malvaceae        | Irano-Turanian | Za             | Hemicryptophyte | NO  |
| 114 | <i>Alcea semnanica</i> Pakravan                            | Malvaceae        | Irano-Turanian | Al             | Hemicryptophyte | YES |
| 115 | <i>Alcea tarica</i> Pakravan & Ghahr.                      | Malvaceae        | Irano-Turanian | Al, Za         | Hemicryptophyte | NO  |

|     |                                                        |              |                                  |            |                 |     |
|-----|--------------------------------------------------------|--------------|----------------------------------|------------|-----------------|-----|
| 116 | <i>Alcea teheranica</i> Parsa                          | Malvaceae    | Irano-Turanian                   | Al, Za     | Hemicryptophyte | YES |
| 117 | <i>Alcea wilhelminae</i> Riedl                         | Malvaceae    | Irano-Turanian                   | Az, Lo     | Hemicryptophyte | NO  |
| 118 | <i>Alchemilla amardica</i> Rothm.                      | Rosaceae     | Euro-Siberian                    | Al         | Hemicryptophyte | YES |
| 119 | <i>Alchemilla citrina</i> S.E.Fröhner                  | Rosaceae     | Euro-Siberian                    | Al, Lo     | Hemicryptophyte | NO  |
| 120 | <i>Alchemilla condensa</i> S.E.Fröhner                 | Rosaceae     | Euro-Siberian                    | Al, Lo     | Hemicryptophyte | YES |
| 121 | <i>Alchemilla farinosa</i> S.E.Fröhner                 | Rosaceae     | Euro-Siberian                    | Al, Az     | Hemicryptophyte | YES |
| 122 | <i>Alchemilla fluminea</i> S.E.Fröhner                 | Rosaceae     | Irano-Turanian,<br>Euro-Siberian | Al, Az     | Hemicryptophyte | YES |
| 123 | <i>Alchemilla gigantodus</i> S.E.Fröhner               | Rosaceae     | Euro-Siberian                    | Al         | Hemicryptophyte | YES |
| 124 | <i>Alchemilla hessii</i> Rothm.                        | Rosaceae     | Irano-Turanian,<br>Euro-Siberian | Al, Az     | Hemicryptophyte | YES |
| 125 | <i>Alchemilla kurdica</i> Rothm.                       | Rosaceae     | Irano-Turanian                   | Za         | Hemicryptophyte | YES |
| 126 | <i>Alchemilla melancholica</i> S.E.Fröhner             | Rosaceae     | Euro-Siberian                    | Al         | Hemicryptophyte | NO  |
| 127 | <i>Alchemilla microscopica</i> S.E.Fröhner             | Rosaceae     | Euro-Siberian                    | Al, Lo     | Hemicryptophyte | YES |
| 128 | <i>Alchemilla pectiniloba</i> S.E.Fröhner              | Rosaceae     | Euro-Siberian                    | Al, Lo     | Hemicryptophyte | YES |
| 129 | <i>Alchemilla plicatissima</i> S.E.Fröhner             | Rosaceae     | Euro-Siberian                    | Al, Lo     | Hemicryptophyte | YES |
| 130 | <i>Alchemilla rechingeri</i> Rothm.                    | Rosaceae     | Euro-Siberian                    | Al         | Hemicryptophyte | YES |
| 131 | <i>Alchemilla surculosa</i> S.E.Fröhner                | Rosaceae     | Euro-Siberian                    | Al         | Hemicryptophyte | YES |
| 132 | <i>Alkanna bracteosa</i> Boiss.                        | Boraginaceae | Irano-Turanian                   | Al, Za, Az | Hemicryptophyte | NO  |
| 133 | <i>Alkanna frigida</i> Boiss.                          | Boraginaceae | Irano-Turanian                   | Al, Za     | Hemicryptophyte | NO  |
| 134 | <i>Allium abbasii</i> R.M.Fritsch                      | Alliaceae    | Irano-Turanian                   | Za         | Geophyte        | YES |
| 135 | <i>Allium akaka</i> S.G.Gmel. ex Schult. & Schult.f.   | Alliaceae    | Irano-Turanian                   | Az         | Geophyte        | NO  |
| 136 | <i>Allium aladaghense</i> Memariani & Joharchi         | Alliaceae    | Irano-Turanian                   | Ko         | Geophyte        | YES |
| 137 | <i>Allium alamutense</i> Razyfard, Zarre & R.M.Fritsch | Alliaceae    | Irano-Turanian                   | Al         | Geophyte        | YES |
| 138 | <i>Allium altissimum</i> Regel                         | Alliaceae    | Irano-Turanian                   | Ko         | Geophyte        | YES |
| 139 | <i>Allium assadii</i> Seisums                          | Alliaceae    | Irano-Turanian                   | Za         | Geophyte        | YES |
| 140 | <i>Allium austroiranicum</i> R.M.Fritsch               | Alliaceae    | Irano-Turanian                   | Za, Ke     | Geophyte        | NO  |
| 141 | <i>Allium autumniflorum</i> F.O.Khass. & Akhani        | Alliaceae    | Irano-Turanian                   | Al         | Geophyte        | YES |
| 142 | <i>Allium aznavense</i> R.M.Fritsch                    | Alliaceae    | Irano-Turanian                   | Az         | Geophyte        | YES |
| 143 | <i>Allium bakhtiaricum</i> Regel                       | Alliaceae    | Irano-Turanian                   | Za, Az     | Geophyte        | NO  |
| 144 | <i>Allium bisotunense</i> R.M.Fritsch                  | Alliaceae    | Irano-Turanian                   | Za         | Geophyte        | NO  |
| 145 | <i>Allium brachyodon</i> Boiss.                        | Alliaceae    | Irano-Turanian                   | Za         | Geophyte        | YES |

|     |                                                            |           |                |            |          |     |
|-----|------------------------------------------------------------|-----------|----------------|------------|----------|-----|
| 146 | <i>Allium brachyscapum</i> Vved.                           | Alliaceae | Irano-Turanian | Ko         | Geophyte | YES |
| 147 | <i>Allium breviscapum</i> Stapf                            | Alliaceae | Irano-Turanian | Az, Za     | Geophyte | NO  |
| 148 | <i>Allium bungei</i> Boiss.                                | Alliaceae | Irano-Turanian | Al, Za, Ke | Geophyte | YES |
| 149 | <i>Allium capitellatum</i> Boiss.                          | Alliaceae | Irano-Turanian | Al, Za     | Geophyte | NO  |
| 150 | <i>Allium cardiostemon</i> Fisch. & C.A.Mey.               | Alliaceae | Irano-Turanian | Az         | Geophyte | NO  |
| 151 | <i>Allium caspium</i> (Pall.) M.Bieb.                      | Alliaceae | Irano-Turanian | Ko, Al, Lo | Geophyte | NO  |
| 152 | <i>Allium cathodicarpum</i> Wendelbo                       | Alliaceae | Irano-Turanian | Ke         | Geophyte | NO  |
| 153 | <i>Allium chloroneurum</i> Boiss.                          | Alliaceae | Irano-Turanian | Ke         | Geophyte | YES |
| 154 | <i>Allium chlorotepalum</i> R.M.Fritsch & M.Jaeger         | Alliaceae | Irano-Turanian | Za         | Geophyte | YES |
| 155 | <i>Allium chrysantherum</i> Boiss. & Reut.                 | Alliaceae | Irano-Turanian | Za         | Geophyte | NO  |
| 156 | <i>Allium clivorum</i> R.M.Fritsch                         | Alliaceae | Irano-Turanian | Al         | Geophyte | YES |
| 157 | <i>Allium cristophii</i> Trautv.                           | Alliaceae | Irano-Turanian | Al, Ko     | Geophyte | NO  |
| 158 | <i>Allium derderianum</i> Regel                            | Alliaceae | Irano-Turanian | Al         | Geophyte | NO  |
| 159 | <i>Allium dolichovaginatatum</i> R.M.Fritsch               | Alliaceae | Irano-Turanian | Ko         | Geophyte | YES |
| 160 | <i>Allium egorovae</i> M.V.Agab. & Ogan.                   | Alliaceae | Irano-Turanian | Az         | Geophyte | NO  |
| 161 | <i>Allium elburzense</i> Wendelbo                          | Alliaceae | Irano-Turanian | Al         | Geophyte | NO  |
| 162 | <i>Allium ellisii</i> Hook.f.                              | Alliaceae | Irano-Turanian | Ko         | Geophyte | NO  |
| 163 | <i>Allium esfahanicum</i> R.M.Fritsch                      | Alliaceae | Irano-Turanian | Za         | Geophyte | NO  |
| 164 | <i>Allium esfandiarii</i> Matin                            | Alliaceae | Irano-Turanian | Az         | Geophyte | YES |
| 165 | <i>Allium fedtschenkoi</i> Nábelek                         | Alliaceae | Irano-Turanian | Za, Az     | Geophyte | NO  |
| 166 | <i>Allium grande</i> Lipsky                                | Alliaceae | Irano-Turanian | Al         | Geophyte | NO  |
| 167 | <i>Allium graveolens</i> (R.M.Fritsch) R.M.Fritsch         | Alliaceae | Irano-Turanian | Za         | Geophyte | NO  |
| 168 | <i>Allium haemanthoides</i> Boiss. & Reut. ex Regel        | Alliaceae | Irano-Turanian | Za         | Geophyte | NO  |
| 169 | <i>Allium hamedanense</i> R.M.Fritsch                      | Alliaceae | Irano-Turanian | Za         | Geophyte | YES |
| 170 | <i>Allium helicophyllum</i> Vved.                          | Alliaceae | Irano-Turanian | Ko         | Geophyte | NO  |
| 171 | <i>Allium hooshidaryae</i> Mashayekhi, Zarre & R.M.Fritsch | Alliaceae | Irano-Turanian | Za         | Geophyte | YES |
| 172 | <i>Allium iranshahrii</i> R.M.Fritsch                      | Alliaceae | Irano-Turanian | Az         | Geophyte | YES |
| 173 | <i>Allium jaegeri</i> R.M.Fritsch                          | Alliaceae | Irano-Turanian | Za         | Geophyte | YES |
| 174 | <i>Allium jesdianum</i> Boiss. & Buhse                     | Alliaceae | Irano-Turanian | Za, Ke     | Geophyte | NO  |
| 175 | <i>Allium joharchii</i> F.O.Khass. & Memariani             | Alliaceae | Irano-Turanian | Ko         | Geophyte | YES |
| 176 | <i>Allium kazerouni</i> Parsa                              | Alliaceae | Irano-Turanian | Za         | Geophyte | NO  |

|     |                                                            |           |                |        |          |     |
|-----|------------------------------------------------------------|-----------|----------------|--------|----------|-----|
| 177 | <i>Allium keusgenii</i> R.M.Fritsch                        | Alliaceae | Irano-Turanian | Za     | Geophyte | YES |
| 178 | <i>Allium kirindicum</i> Bornm.                            | Alliaceae | Irano-Turanian | Za     | Geophyte | YES |
| 179 | <i>Allium koelzii</i> (Wendelbo) Perss. & Wendelbo         | Alliaceae | Irano-Turanian | Za     | Geophyte | NO  |
| 180 | <i>Allium kotschyi</i> Boiss.                              | Alliaceae | Irano-Turanian | Za     | Geophyte | YES |
| 181 | <i>Allium kuhrangense</i> Akhavan, Saeidi & R.M.Fritsch    | Alliaceae | Irano-Turanian | Za     | Geophyte | YES |
| 182 | <i>Allium kuhshorkhense</i> R.M.Fritsch & Joharchi         | Alliaceae | Irano-Turanian | Ko     | Geophyte | NO  |
| 183 | <i>Allium kurdistanicum</i> Maroofi & R.M.Fritsch          | Alliaceae | Irano-Turanian | Za     | Geophyte | YES |
| 184 | <i>Allium lalesaricum</i> Freyn & Bornm.                   | Alliaceae | Irano-Turanian | Za, Ke | Geophyte | YES |
| 185 | <i>Allium latifolium</i> Jaub. & Spach                     | Alliaceae | Irano-Turanian | Az, Za | Geophyte | NO  |
| 186 | <i>Allium longipapillatum</i> R.M.Fritsch & Martin         | Alliaceae | Irano-Turanian | Za     | Geophyte | YES |
| 187 | <i>Allium longivaginatatum</i> Wendelbo                    | Alliaceae | Irano-Turanian | Za     | Geophyte | YES |
| 188 | <i>Allium mahneshanense</i> Razyfard, Zarre & R.M.Fritsch  | Alliaceae | Irano-Turanian | Az     | Geophyte | YES |
| 189 | <i>Allium materculae</i> Bordz.                            | Alliaceae | Irano-Turanian | Az     | Geophyte | NO  |
| 190 | <i>Allium minutiflorum</i> Regel                           | Alliaceae | Irano-Turanian | Za     | Geophyte | NO  |
| 191 | <i>Allium moderense</i> R.M.Fritsch                        | Alliaceae | Irano-Turanian | Za     | Geophyte | YES |
| 192 | <i>Allium monophyllum</i> Vved. ex Czerniak.               | Alliaceae | Irano-Turanian | Ko     | Geophyte | NO  |
| 193 | <i>Allium montelburzense</i> R.M.Fritsch, Salmaki & Zarre  | Alliaceae | Irano-Turanian | Al     | Geophyte | YES |
| 194 | <i>Allium mozaffarianii</i> Maroofi & R.M.Fritsch          | Alliaceae | Irano-Turanian | Za     | Geophyte | YES |
| 195 | <i>Allium najafdaricum</i> R.M.Fritsch                     | Alliaceae | Irano-Turanian | Al     | Geophyte | YES |
| 196 | <i>Allium orientoiranicum</i> Neshati, Zarre & R.M.Fritsch | Alliaceae | Irano-Turanian | Ko     | Geophyte | NO  |
| 197 | <i>Allium pseudobodeanum</i> R.M.Fritsch & Martin          | Alliaceae | Irano-Turanian | Al     | Geophyte | NO  |
| 198 | <i>Allium pseudohollandicum</i> R.M.Fritsch                | Alliaceae | Irano-Turanian | Az     | Geophyte | NO  |
| 199 | <i>Allium regelii</i> Trautv.                              | Alliaceae | Irano-Turanian | Ko     | Geophyte | NO  |
| 200 | <i>Allium remediorum</i> (R.M.Fritsch) R.M.Fritsch         | Alliaceae | Irano-Turanian | Za     | Geophyte | NO  |
| 201 | <i>Allium sabalense</i> R.M.Fritsch                        | Alliaceae | Irano-Turanian | Az     | Geophyte | YES |
| 202 | <i>Allium sahandicum</i> R.M.Fritsch                       | Alliaceae | Irano-Turanian | Az     | Geophyte | NO  |
| 203 | <i>Allium sanandajense</i> Maroofi & R.M.Fritsch           | Alliaceae | Irano-Turanian | Az, Za | Geophyte | YES |
| 204 | <i>Allium saralicum</i> R.M.Fritsch                        | Alliaceae | Irano-Turanian | Al     | Geophyte | NO  |
| 205 | <i>Allium scotostemon</i> Wendelbo                         | Alliaceae | Irano-Turanian | Za     | Geophyte | NO  |
| 206 | <i>Allium shatakiense</i> Rech.f.                          | Alliaceae | Irano-Turanian | Za     | Geophyte | YES |
| 207 | <i>Allium shelkovnikovii</i> Grossh.                       | Alliaceae | Irano-Turanian | Az     | Geophyte | NO  |



|     |                                                  |                 |                                   |            |                 |     |
|-----|--------------------------------------------------|-----------------|-----------------------------------|------------|-----------------|-----|
| 208 | <i>Allium straussii</i> Bornm.                   | Alliaceae       | Irano-Turanian                    | Za         | Geophyte        | YES |
| 209 | <i>Allium subakaka</i> Razyfard & Zarre          | Alliaceae       | Irano-Turanian                    | Az         | Geophyte        | NO  |
| 210 | <i>Allium subvineale</i> Wendelbo                | Alliaceae       | Irano-Turanian                    | Al         | Geophyte        | YES |
| 211 | <i>Allium subnotabile</i> Wendelbo               | Alliaceae       | Irano-Turanian                    | Za         | Geophyte        | YES |
| 212 | <i>Allium tuchalense</i> F.O.Khass. & Noroozi    | Alliaceae       | Irano-Turanian                    | Al         | Geophyte        | YES |
| 213 | <i>Allium ubipetrense</i> R.M.Fritsch            | Alliaceae       | Irano-Turanian                    | Za         | Geophyte        | NO  |
| 214 | <i>Allium vescum</i> Wendelbo                    | Alliaceae       | Irano-Turanian                    |            | Geophyte        | YES |
| 215 | <i>Allium wendelboi</i> Matin                    | Alliaceae       | Irano-Turanian                    |            | Geophyte        | YES |
| 216 | <i>Allium zagricum</i> R.M.Fritsch               | Alliaceae       | Irano-Turanian                    | Za         | Geophyte        | NO  |
| 217 | <i>Allochrysa lutea</i> Falat. & Mahmoodi        | Caryophyllaceae | Irano-Turanian                    |            | Hemicryptophyte | YES |
| 218 | <i>Allochrysa persica</i> (Boiss.) Boiss.        | Caryophyllaceae | Irano-Turanian                    | Az         | Chamaephyte     | YES |
| 219 | <i>Alnus djavanshirii</i> H.Zare                 | Betulaceae      | Euro-Siberian                     | Al         | Phanerophyte    | YES |
| 220 | <i>Alnus dolichocarpa</i> H.Zare, Amini & Assadi | Betulaceae      | Euro-Siberian                     |            | Phanerophyte    | YES |
| 221 | <i>Alococarpum erianthum</i> (DC.) Riedl & Kuber | Apiaceae        | Irano-Turanian                    | Al, Az     | Hemicryptophyte | NO  |
| 222 | <i>Alrawia bellii</i> (Baker) Perss. & Wendelbo  | Asparagaceae    | Irano-Turanian                    | Za, Ke     | Geophyte        | NO  |
| 223 | <i>Alyssum bracteatum</i> Boiss. & Bushe         | Brassicaceae    | Irano-Turanian                    | Al, ze, Az | Hemicryptophyte | NO  |
| 224 | <i>Alyssum hezarmasjedense</i> Kavousi & Nazary  | Brassicaceae    | Irano-Turanian                    | Ko         | Chamaephyte     | YES |
| 225 | <i>Alyssum lanigerum</i> DC.                     | Brassicaceae    | Irano-Turanian                    | Al, Az, Za | Chamaephyte     | NO  |
| 226 | <i>Alyssum mozaffarianii</i> Kavousi             | Brassicaceae    | Irano-Turanian                    | Al         | Chamaephyte     | YES |
| 227 | <i>Alyssum muelleri</i> Boiss. & Bushe           | Brassicaceae    | Irano-Turanian                    | Al, Za, Ke | Hemicryptophyte | YES |
| 228 | <i>Alyssum persicum</i> Boiss.                   | Brassicaceae    | Irano-Turanian                    | Za         | Chamaephyte     | YES |
| 229 | <i>Alyssum polycladum</i> Rech.f.                | Brassicaceae    | Irano-Turanian                    | Za, Al, Za | Chamaephyte     | NO  |
| 230 | <i>Alyssum stipitatum</i> Kavousi & T.R.Dudley   | Brassicaceae    | Irano-Turanian                    | Al         | Chamaephyte     | YES |
| 231 | <i>Alyssum turgidum</i> Dudley                   | Brassicaceae    | Irano-Turanian                    | Za         | Hemicryptophyte | YES |
| 232 | <i>Amberboa lippii</i> (L.) DC.                  | Asteraceae      | Saharo-Sindian                    |            | Therophyte      | YES |
| 233 | <i>Amberboa maroofii</i> Negaresh                | Asteraceae      | Irano-Turanian                    | Za         | Therophyte      | YES |
| 234 | <i>Amberboa sosnovskiyi</i> Iljin                | Asteraceae      | Irano-Turanian                    | Az         | Therophyte      | YES |
| 235 | <i>Amberboa zanjanica</i> Ranjbar & Negaresh     | Asteraceae      | Irano-Turanian                    |            | Therophyte      | YES |
| 236 | <i>Amygdalus eburnea</i> Spach                   | Rosaceae        | Irano-Turanian,<br>Saharo-Sindian | Za, Ke, Lo | Phanerophyte    | NO  |
| 237 | <i>Amygdalus elaeagnifolia</i> Spach             | Rosaceae        | Irano-Turanian                    | Za, Ke     | Phanerophyte    | NO  |

|     |                                                               |                |                                   |            |                 |     |
|-----|---------------------------------------------------------------|----------------|-----------------------------------|------------|-----------------|-----|
| 238 | <i>Amygdalus glauca</i> Browicz                               | Rosaceae       | Irano-Turanian                    | Za         | Phanerophyte    | YES |
| 239 | <i>Amygdalus haussknechtii</i> (C.K.Schneid.) Bornm.          | Rosaceae       | Irano-Turanian                    | Za         | Phanerophyte    | NO  |
| 240 | <i>Amygdalus kurdistanica</i> Attar, Maroofi & Vafadar        | Rosaceae       | Irano-Turanian                    | Za         | Phanerophyte    | YES |
| 241 | <i>Amygdalus orazii</i> Attar, Maroofi & Vafadar              | Rosaceae       | Irano-Turanian                    | Za         | Phanerophyte    | YES |
| 242 | <i>Amygdalus paboti</i> Browicz                               | Rosaceae       | Irano-Turanian                    | Za         | Phanerophyte    | YES |
| 243 | <i>Amygdalus reticulata</i> Runemark ex Khat.                 | Rosaceae       | Irano-Turanian                    | Za         | Phanerophyte    | YES |
| 244 | <i>Amygdalus wendelboi</i> Freitag                            | Rosaceae       | Irano-Turanian                    | Ke, Lo     | Phanerophyte    | YES |
| 245 | <i>Anabasis calcarea</i> (Charif & Aellen) Bokhari & Wendelbo | Chenopodiaceae | Irano-Turanian                    |            | Chamaephyte     | NO  |
| 246 | <i>Anabasis firouzii</i> Akhani                               | Chenopodiaceae | Irano-Turanian                    | Ko         | Hemicryptophyte | YES |
| 247 | <i>Anabasis haussknechtii</i> Bunge ex Boiss.                 | Chenopodiaceae | Irano-Turanian                    |            | Chamaephyte     | NO  |
| 248 | <i>Anchonium elichrysifolium</i> (DC.) Boiss.                 | Brassicaceae   | Irano-Turanian                    | Al, Az, Lo | Hemicryptophyte | NO  |
| 249 | <i>Andrachne fruticulosa</i> Boiss.                           | Euphorbiaceae  | Irano-Turanian                    | Za, Ke, Lo | Chamaephyte     | NO  |
| 250 | <i>Angelica urumiensis</i> Mozaff.                            | Apiaceae       | Irano-Turanian                    | Al         | Hemicryptophyte | YES |
| 251 | <i>Anthemis atropatana</i> Iranshahr                          | Asteraceae     | Irano-Turanian                    | Az         | Therophyte      | NO  |
| 252 | <i>Anthemis austroiranica</i> Rech.f., Aellen & Esfand.       | Asteraceae     | Irano-Turanian,<br>Saharo-Sindian |            | Therophyte      | NO  |
| 253 | <i>Anthemis brachystephana</i> Bornm. & Gauba                 | Asteraceae     | Irano-Turanian                    |            | Therophyte      | NO  |
| 254 | <i>Anthemis bushehrlica</i> Iranshahr                         | Asteraceae     | Saharo-Sindian                    |            | Therophyte      | YES |
| 255 | <i>Anthemis fungosa</i> Boiss. & Hauskn.                      | Asteraceae     | Saharo-Sindian                    |            | Therophyte      | YES |
| 256 | <i>Anthemis gayana</i> Boiss.                                 | Asteraceae     | Irano-Turanian                    | Za, Ke     | Therophyte      | NO  |
| 257 | <i>Anthemis gilanica</i> Bornm. & Gauba                       | Asteraceae     | Irano-Turanian                    | Al, Za     | Therophyte      | NO  |
| 258 | <i>Anthemis gillettii</i> Iranshahr                           | Asteraceae     | Saharo-Sindian                    |            | Therophyte      | YES |
| 259 | <i>Anthemis gracilis</i> Iranshahr                            | Asteraceae     | Irano-Turanian                    | Za         | Therophyte      | YES |
| 260 | <i>Anthemis hemistephana</i> Boiss.                           | Asteraceae     | Irano-Turanian                    |            | Therophyte      | YES |
| 261 | <i>Anthemis leptophylla</i> Eig                               | Asteraceae     | Saharo-Sindian                    |            | Therophyte      | YES |
| 262 | <i>Anthemis lorestanica</i> Iranshahr                         | Asteraceae     | Irano-Turanian,<br>Saharo-Sindian | Za         | Therophyte      | NO  |
| 263 | <i>Anthemis mazandarana</i> Iranshahr                         | Asteraceae     | Euro-Siberian                     | Al         | Therophyte      | YES |
| 264 | <i>Anthemis mirheydari</i> Iranshahr                          | Asteraceae     | Saharo-Sindian                    |            | Therophyte      | YES |
| 265 | <i>Anthemis moghanica</i> Iranshahr                           | Asteraceae     | Irano-Turanian                    | Az         | Therophyte      | NO  |
| 266 | <i>Anthemis persica</i> Boiss.                                | Asteraceae     | Saharo-Sindian                    |            | Therophyte      | NO  |
| 267 | <i>Anthemis schizostephana</i> Boiss. & Hauskn.               | Asteraceae     | Irano-Turanian                    | Za         | Therophyte      | NO  |

|     |                                                               |                  |                                  |                |                 |     |
|-----|---------------------------------------------------------------|------------------|----------------------------------|----------------|-----------------|-----|
| 268 | <i>Anthemis susiana</i> Nábělek                               | Asteraceae       | Saharo-Sindian                   |                | Therophyte      | NO  |
| 269 | <i>Anthemis talyschensis</i> Fed.                             | Asteraceae       | Irano-Turanian                   | Az             | Hemicryptophyte | YES |
| 270 | <i>Anthochlamys multinervis</i> Rech.f.                       | Chenopodiaceae   | Irano-Turanian                   |                | Therophyte      | NO  |
| 271 | <i>Aphanopleura breviseta</i> (Boiss.) Heywood & Jury         | Apiaceae         | Irano-Turanian                   |                | Therophyte      | NO  |
| 272 | <i>Arabis ottonis-schulzii</i> Bornm. & Gauba                 | Brassicaceae     | Irano-Turanian                   | Al             | Hemicryptophyte | YES |
| 273 | <i>Arabis rimarum</i> Rech.f.                                 | Brassicaceae     | Irano-Turanian                   | Al             | Hemicryptophyte | YES |
| 274 | <i>Arenaria assadii</i> Fadaie                                | Caryophyllaceae  | Irano-Turanian                   | Az             | Hemicryptophyte | YES |
| 275 | <i>Arenaria bulica</i> Stapf ex F.N.Williams                  | Caryophyllaceae  | Irano-Turanian                   | Za, Ke         | Chamaephyte     | YES |
| 276 | <i>Arenaria kandavanensis</i> Fadaie, Sheidai & Assadi        | Caryophyllaceae  | Euro-Siberian                    | Al             | Hemicryptophyte | YES |
| 277 | <i>Arenaria longibracteata</i> Fadaie                         | Caryophyllaceae  | Irano-Turanian                   | Az             | Hemicryptophyte | YES |
| 278 | <i>Arenaria minutissima</i> Rech.f. & Esfand.                 | Caryophyllaceae  | Irano-Turanian                   | Za, Ke         | Chamaephyte     | YES |
| 279 | <i>Arenaria persica</i> Boiss.                                | Caryophyllaceae  | Irano-Turanian                   | Za, Ke         | Chamaephyte     | NO  |
| 280 | <i>Arenaria polycnemifolia</i> Boiss.                         | Caryophyllaceae  | Irano-Turanian                   | Al, Za         | Chamaephyte     | NO  |
| 281 | <i>Arenaria semiromica</i> Fadaie                             | Caryophyllaceae  | Irano-Turanian                   | Za             | Hemicryptophyte | YES |
| 282 | <i>Arenaria szowitsii</i> Boiss.                              | Caryophyllaceae  | Irano-Turanian                   | Az             | Chamaephyte     | NO  |
| 283 | <i>Arenaria tetrasticha</i> Boiss.                            | Caryophyllaceae  | Irano-Turanian                   | Za             | Chamaephyte     | YES |
| 284 | <i>Arenaria zargariana</i> Parsa                              | Caryophyllaceae  | Irano-Turanian                   | Al, Za         | Chamaephyte     | NO  |
| 285 | <i>Argyrobium trigonelloides</i> Jaub. & Spach                | Fabaceae         | Irano-Turanian                   | Al, Za, Ke, Az | Hemicryptophyte | NO  |
| 286 | <i>Aristolochia hyrcana</i> P.H.Davis & M.S.Khan              | Aristolochiaceae | Irano-Turanian,<br>Euro-Siberian | Al             | Geophyte        | YES |
| 287 | <i>Aristolochia olivieri</i> Colleg. ex Boiss.                | Aristolochiaceae | Irano-Turanian                   | Al, Za         | Hemicryptophyte | NO  |
| 288 | <i>Arnebia violascens</i> Riedl                               | Boraginaceae     | Saharo-Sindian                   |                | Therophyte      | YES |
| 289 | <i>Artemisia gypsacea</i> Krasch., Popov & Lincz. ex Poljakov | Asteraceae       | Irano-Turanian                   | Ko             | Hemicryptophyte | YES |
| 290 | <i>Artemisia kermanensis</i> Podlech                          | Asteraceae       | Irano-Turanian                   | Ke, Lo         | Chamaephyte     | NO  |
| 291 | <i>Artemisia khorassanica</i> Podlech                         | Asteraceae       | Irano-Turanian                   | Al, Ko         | Hemicryptophyte | NO  |
| 292 | <i>Artemisia kulbadica</i> Boiss. & Buhse                     | Asteraceae       | Euro-Siberian                    |                | Hemicryptophyte | YES |
| 293 | <i>Artemisia melanolepis</i> Boiss.                           | Asteraceae       | Irano-Turanian                   | Al, Az         | Chamaephyte     | NO  |
| 294 | <i>Artemisia quettensis</i> Podlech                           | Asteraceae       | Irano-Turanian                   | Ko             | Hemicryptophyte | YES |
| 295 | <i>Artemisia splendens</i> Willd.                             | Asteraceae       | Irano-Turanian                   | Al, Az         | Hemicryptophyte | NO  |
| 296 | <i>Arum giganteum</i> Ghahr.                                  | Araceae          | Irano-Turanian                   | Za             | Geophyte        | NO  |
| 297 | <i>Asparagus khorasanensis</i> Hamdi & Assadi                 | Asparagaceae     | Irano-Turanian                   | Ko             | Chamaephyte     | YES |

|     |                                                   |              |                                   |        |                 |     |
|-----|---------------------------------------------------|--------------|-----------------------------------|--------|-----------------|-----|
| 298 | <i>Asparagus touranensis</i> Hamdi & Assadi       | Asparagaceae | Irano-Turanian,<br>Saharo-Sindian |        | Chamaephyte     | NO  |
| 299 | <i>Asperula fragillima</i> Boiss. & Hausskn.      | Rubiaceae    | Irano-Turanian                    | Za     | Hemicryptophyte | NO  |
| 300 | <i>Asperula gorganica</i> Schönb.-Tem. & Ehrend.  | Rubiaceae    | Euro-Siberian                     | Al     | Chamaephyte     | YES |
| 301 | <i>Asperula mazanderanica</i> Ehrend.             | Rubiaceae    | Euro-Siberian                     | Al     | Chamaephyte     | NO  |
| 302 | <i>Asperula microphylla</i> Boiss.                | Rubiaceae    | Euro-Siberian                     | Al     | Hemicryptophyte | NO  |
| 303 | <i>Asperula oppositifolia</i> Regel & Schmalh.    | Rubiaceae    | Irano-Turanian                    | Ko     | Hemicryptophyte | YES |
| 304 | <i>Asperula rechingeri</i> Ehrend. & Schönb.-Tem. | Rubiaceae    | Irano-Turanian                    | Za     | Chamaephyte     | NO  |
| 305 | <i>Asperula rezaiyensis</i> Schönb.-Tem.          | Rubiaceae    | Irano-Turanian                    | Az     | Chamaephyte     | YES |
| 306 | <i>Asperula seticornis</i> Boiss.                 | Rubiaceae    | Irano-Turanian                    | Za     | Therophyte      | YES |
| 307 | <i>Asperula sherardioides</i> Jaub. & Spach       | Rubiaceae    | Irano-Turanian                    |        | Therophyte      | YES |
| 308 | <i>Aster bachtiaricus</i> Mozaff.                 | Asteraceae   | Irano-Turanian                    | Za     | Hemicryptophyte | YES |
| 309 | <i>Astragalus abadehensis</i> Maassoumi & Podlech | Fabaceae     | Irano-Turanian                    | Za     | Hemicryptophyte | YES |
| 310 | <i>Astragalus abharensis</i> Maassoumi & Podlech  | Fabaceae     | Irano-Turanian                    | Za     | Hemicryptophyte | YES |
| 311 | <i>Astragalus abnormalis</i> Rech.f.              | Fabaceae     | Irano-Turanian                    | Za     | Hemicryptophyte | NO  |
| 312 | <i>Astragalus absconditus</i> Zarre & Podlech     | Fabaceae     | Irano-Turanian                    | Za     | Hemicryptophyte | YES |
| 313 | <i>Astragalus absentivus</i> Maassoumi            | Fabaceae     | Irano-Turanian                    | Al     | Hemicryptophyte | YES |
| 314 | <i>Astragalus acutifolius</i> Bunge               | Fabaceae     | Irano-Turanian                    |        | Chamaephyte     | YES |
| 315 | <i>Astragalus adulterinus</i> Podlech             | Fabaceae     | Irano-Turanian                    | Za     | Hemicryptophyte | YES |
| 316 | <i>Astragalus aestimabilis</i> Podlech            | Fabaceae     | Irano-Turanian                    | Za     | Chamaephyte     | YES |
| 317 | <i>Astragalus aestivorum</i> Podlech              | Fabaceae     | Irano-Turanian                    | Al     | Hemicryptophyte | YES |
| 318 | <i>Astragalus affinis</i> Podlech & Zarre         | Fabaceae     | Irano-Turanian                    | Ko     | Hemicryptophyte | YES |
| 319 | <i>Astragalus ahangarensis</i> Zarre & Podlech    | Fabaceae     | Irano-Turanian                    |        | Hemicryptophyte | YES |
| 320 | <i>Astragalus aharicus</i> Maassoumi & Podlech    | Fabaceae     | Irano-Turanian                    | Az     | Hemicryptophyte | NO  |
| 321 | <i>Astragalus ahmad-parsae</i> Maassoumi          | Fabaceae     | Irano-Turanian                    | Za     | Chamaephyte     | YES |
| 322 | <i>Astragalus ahmed-adlii</i> Bornm. & Gauba      | Fabaceae     | Irano-Turanian                    |        | Chamaephyte     | YES |
| 323 | <i>Astragalus akhanii</i> Podlech                 | Fabaceae     | Saharo-Sindian                    |        | Hemicryptophyte | YES |
| 324 | <i>Astragalus alamouticus</i> Maassoumi           | Fabaceae     | Irano-Turanian                    | Al     | Hemicryptophyte | YES |
| 325 | <i>Astragalus alavaanus</i> Podlech               | Fabaceae     | Irano-Turanian                    |        | Hemicryptophyte | YES |
| 326 | <i>Astragalus albispinus</i> Širj. & Bornm.       | Fabaceae     | Irano-Turanian                    | Za, Ke | Chamaephyte     | NO  |
| 327 | <i>Astragalus alienus</i> Podlech                 | Fabaceae     | Irano-Turanian                    | Za     | Hemicryptophyte | YES |

|     |                                                                        |          |                                   |            |                 |     |
|-----|------------------------------------------------------------------------|----------|-----------------------------------|------------|-----------------|-----|
| 328 | <i>Astragalus aliomranii</i> Maassoumi                                 | Fabaceae | Irano-Turanian                    | Az         | Hemicryptophyte | YES |
| 329 | <i>Astragalus altimontanus</i> Podlech & Maassoumi                     | Fabaceae | Irano-Turanian                    | Al         | Hemicryptophyte | YES |
| 330 | <i>Astragalus altiusculus</i> Maassoumi & Ghahrem.                     | Fabaceae | Irano-Turanian                    | Al         | Chamaephyte     | YES |
| 331 | <i>Astragalus alyssiformis</i> Maassoumi, Ghahrem. & Javadi            | Fabaceae | Irano-Turanian                    | Al         | Hemicryptophyte | YES |
| 332 | <i>Astragalus ammodendroides</i> Bornm.                                | Fabaceae | Irano-Turanian                    |            | Chamaephyte     | YES |
| 333 | <i>Astragalus anacamptus</i> Bunge                                     | Fabaceae | Irano-Turanian                    | Al         | Hemicryptophyte | YES |
| 334 | <i>Astragalus andabaddensis</i> Maassoumi, Bagheri & F.Ghahrem.        | Fabaceae | Irano-Turanian                    | Az         | Hemicryptophyte | YES |
| 335 | <i>Astragalus andabilensis</i> Ranjbar & Mahmoudian                    | Fabaceae | Irano-Turanian                    | Az         | Hemicryptophyte | YES |
| 336 | <i>Astragalus anguranensis</i> Podlech & Maassoumi                     | Fabaceae | Irano-Turanian                    | Az         | Chamaephyte     | YES |
| 337 | <i>Astragalus angustistipulatus</i> Podlech                            | Fabaceae | Irano-Turanian                    | Ke         | Hemicryptophyte | YES |
| 338 | <i>Astragalus anodiophilus</i> Zarre & Podlech                         | Fabaceae | Irano-Turanian                    | Za         | Hemicryptophyte | YES |
| 339 | <i>Astragalus anserinifolius</i> Boiss.                                | Fabaceae | Irano-Turanian,<br>Saharo-Sindian | Za, Ke, Bl | Hemicryptophyte | NO  |
| 340 | <i>Astragalus arasbaranensis</i> Maassoumi & Ranjbar                   | Fabaceae | Irano-Turanian                    | Az         | Hemicryptophyte | YES |
| 341 | <i>Astragalus archibaldii</i> Podlech                                  | Fabaceae | Irano-Turanian                    | Za         | Hemicryptophyte | YES |
| 342 | <i>Astragalus ardahalicus</i> Parsa                                    | Fabaceae | Irano-Turanian                    | Za         | Chamaephyte     | NO  |
| 343 | <i>Astragalus argyrostachys</i> Boiss.                                 | Fabaceae | Irano-Turanian                    | Za         | Chamaephyte     | NO  |
| 344 | <i>Astragalus ashtianensis</i> Podlech & Maassoumi                     | Fabaceae | Irano-Turanian                    | Za         | Hemicryptophyte | YES |
| 345 | <i>Astragalus askius</i> Bunge                                         | Fabaceae | Irano-Turanian                    | Al         | Hemicryptophyte | NO  |
| 346 | <i>Astragalus aspadanus</i> Bunge                                      | Fabaceae | Irano-Turanian                    | Za         | Hemicryptophyte | NO  |
| 347 | <i>Astragalus aspreticola</i> Podlech                                  | Fabaceae | Irano-Turanian                    | Ko         | Hemicryptophyte | YES |
| 348 | <i>Astragalus assadabadensis</i> Ghahrem.-Nejad & Podlech              | Fabaceae | Irano-Turanian                    | Za         | Hemicryptophyte | YES |
| 349 | <i>Astragalus assadii</i> Maassoumi & Podlech                          | Fabaceae | Irano-Turanian                    | Ko         | Hemicryptophyte | YES |
| 350 | <i>Astragalus atricapillus</i> Bornm.                                  | Fabaceae | Irano-Turanian                    | Al         | Hemicryptophyte | NO  |
| 351 | <i>Astragalus attarae</i> Podlech                                      | Fabaceae | Irano-Turanian                    | Ko         | Hemicryptophyte | YES |
| 352 | <i>Astragalus austrokorasanicus</i> Podlech                            | Fabaceae | Irano-Turanian                    | Ko         | Chamaephyte     | YES |
| 353 | <i>Astragalus austromahneshanensis</i> F.Ghahrem., Maassoumi & Bagheri | Fabaceae | Irano-Turanian                    | Az         | Chamaephyte     | YES |
| 354 | <i>Astragalus avajensis</i> Podlech                                    | Fabaceae | Irano-Turanian                    | Za         | Hemicryptophyte | YES |
| 355 | <i>Astragalus avicennicus</i> Parsa                                    | Fabaceae | Irano-Turanian                    | Za         | Hemicryptophyte | NO  |
| 356 | <i>Astragalus azizii</i> Maassoumi                                     | Fabaceae | Irano-Turanian                    | Al         | Hemicryptophyte | YES |
| 357 | <i>Astragalus aznaicus</i> Podlech & Maassoumi                         | Fabaceae | Irano-Turanian                    | Za         | Hemicryptophyte | YES |

|     |                                                                   |          |                |                |                 |     |
|-----|-------------------------------------------------------------------|----------|----------------|----------------|-----------------|-----|
| 358 | <i>Astragalus baba-alliar</i> Parsa                               | Fabaceae | Saharo-Sindian |                | Chamaephyte     | NO  |
| 359 | <i>Astragalus babakhanloui</i> Maassoumi & Podlech                | Fabaceae | Irano-Turanian | Za             | Hemicryptophyte | NO  |
| 360 | <i>Astragalus badelehensis</i> Maassoumi & Taheri                 | Fabaceae | Irano-Turanian | Al             | Hemicryptophyte | YES |
| 361 | <i>Astragalus baftensis</i> Ranjbar & Maassoumi                   | Fabaceae | Irano-Turanian | Ke             | Hemicryptophyte | YES |
| 362 | <i>Astragalus baharensis</i> Ghahrem.                             | Fabaceae | Irano-Turanian | Ko             | Chamaephyte     | YES |
| 363 | <i>Astragalus bajgiranensis</i> Podlech                           | Fabaceae | Irano-Turanian | Ko             | Hemicryptophyte | YES |
| 364 | <i>Astragalus baraftabensis</i> Maassoumi & Podlech               | Fabaceae | Irano-Turanian | Za             | Hemicryptophyte | YES |
| 365 | <i>Astragalus barnasariformis</i> Maassoumi, F.Ghahrem. & Bagheri | Fabaceae | Irano-Turanian |                | Hemicryptophyte | YES |
| 366 | <i>Astragalus bashmaghensis</i> Maassoumi & Podlech               | Fabaceae | Irano-Turanian | Al             | Chamaephyte     | YES |
| 367 | <i>Astragalus bashmensis</i> Maassoumi                            | Fabaceae | Irano-Turanian | Al             | Hemicryptophyte | YES |
| 368 | <i>Astragalus basilicus</i> Podlech & Maassoumi                   | Fabaceae | Irano-Turanian | Az             | Hemicryptophyte | NO  |
| 369 | <i>Astragalus bavanatensis</i> Maassoumi, Nowroozi & Podlech      | Fabaceae | Irano-Turanian | Za             | Hemicryptophyte | YES |
| 370 | <i>Astragalus bavanaticus</i> Maassoumi, Nowroozi & Podlech       | Fabaceae | Irano-Turanian | Za             | Hemicryptophyte | YES |
| 371 | <i>Astragalus bazarganii</i> Podlech & Zarre                      | Fabaceae | Irano-Turanian | Ko, Lo         | Chamaephyte     | NO  |
| 372 | <i>Astragalus bazmanicus</i> Podlech                              | Fabaceae | Irano-Turanian |                | Chamaephyte     | YES |
| 373 | <i>Astragalus beckii</i> Bornm.                                   | Fabaceae | Irano-Turanian | Al, Az         | Hemicryptophyte | NO  |
| 374 | <i>Astragalus bejourensis</i> Podlech & Maassoumi                 | Fabaceae | Irano-Turanian | Az             | Hemicryptophyte | YES |
| 375 | <i>Astragalus belgheisicoides</i> Podlech & Maassoumi             | Fabaceae | Irano-Turanian | Az             | Hemicryptophyte | YES |
| 376 | <i>Astragalus belgheisicus</i> Maassoumi                          | Fabaceae | Irano-Turanian | Al, Za         | Hemicryptophyte | NO  |
| 377 | <i>Astragalus biarjmandicus</i> Podlech & Zarre                   | Fabaceae | Irano-Turanian |                | Chamaephyte     | YES |
| 378 | <i>Astragalus bijarensis</i> Podlech & Sytin                      | Fabaceae | Irano-Turanian | Az             | Hemicryptophyte | YES |
| 379 | <i>Astragalus birangiae</i> Maassoumi                             | Fabaceae | Irano-Turanian | Az             | Hemicryptophyte | YES |
| 380 | <i>Astragalus biserrula</i> Bunge                                 | Fabaceae | Irano-Turanian | Az, Za, Al, Ko | Hemicryptophyte | NO  |
| 381 | <i>Astragalus bodeanus</i> Fisch.                                 | Fabaceae | Irano-Turanian | Za             | Chamaephyte     | NO  |
| 382 | <i>Astragalus bojnurdensis</i> Podlech                            | Fabaceae | Irano-Turanian | Ko             | Hemicryptophyte | YES |
| 383 | <i>Astragalus bordschensis</i> Bornm.                             | Fabaceae | Irano-Turanian | Za             | Hemicryptophyte | YES |
| 384 | <i>Astragalus borujenensis</i> Ranjbar & Maassoumi                | Fabaceae | Irano-Turanian | Za             | Chamaephyte     | YES |
| 385 | <i>Astragalus botryophorus</i> Maassoumi & Podlech                | Fabaceae | Irano-Turanian | Za             | Chamaephyte     | YES |
| 386 | <i>Astragalus bounophilus</i> Boiss.                              | Fabaceae | Irano-Turanian | Al             | Chamaephyte     | YES |
| 387 | <i>Astragalus bozghoushensis</i> Maassoumi, Mozaff. & Ramezani    | Fabaceae | Irano-Turanian | Az             | Hemicryptophyte | YES |
| 388 | <i>Astragalus brachyodontus</i> Boiss.                            | Fabaceae | Irano-Turanian | Az, Za, Al     | Hemicryptophyte | NO  |

|     |                                                       |          |                |            |                 |     |
|-----|-------------------------------------------------------|----------|----------------|------------|-----------------|-----|
| 389 | <i>Astragalus bradosticus</i> Maassoumi & Podlech     | Fabaceae | Irano-Turanian | Az         | Chamaephyte     | YES |
| 390 | <i>Astragalus brevicalycinus</i> Maassoumi            | Fabaceae | Saharo-Sindian |            | Phanerophyte    | YES |
| 391 | <i>Astragalus brevipedunculatus</i> Ranjbar           | Fabaceae | Irano-Turanian | Az         | Hemicryptophyte | YES |
| 392 | <i>Astragalus brevirhachis</i> Tietz & Zarre          | Fabaceae | Irano-Turanian | Ke         | Chamaephyte     | YES |
| 393 | <i>Astragalus brevitomentosus</i> Podlech             | Fabaceae | Irano-Turanian | Za         | Hemicryptophyte | YES |
| 394 | <i>Astragalus brunsianus</i> Bornm.                   | Fabaceae | Irano-Turanian | Al         | Chamaephyte     | YES |
| 395 | <i>Astragalus bukanensis</i> Maassoumi & Podlech      | Fabaceae | Irano-Turanian | Az         | Hemicryptophyte | YES |
| 396 | <i>Astragalus caespititius</i> Podlech                | Fabaceae | Irano-Turanian | Ke         | Hemicryptophyte | YES |
| 397 | <i>Astragalus callainus</i> Podlech                   | Fabaceae | Irano-Turanian | Ko         | Hemicryptophyte | NO  |
| 398 | <i>Astragalus calliphysa</i> Bunge                    | Fabaceae | Irano-Turanian | Za, Ke     | Chamaephyte     | NO  |
| 399 | <i>Astragalus campylanthoides</i> Bornm.              | Fabaceae | Irano-Turanian | Za, Az     | Chamaephyte     | YES |
| 400 | <i>Astragalus campylanthus</i> Boiss.                 | Fabaceae | Irano-Turanian | Za, Ke     | Chamaephyte     | NO  |
| 401 | <i>Astragalus canosus</i> Maassoumi                   | Fabaceae | Irano-Turanian | Az         | Hemicryptophyte | YES |
| 402 | <i>Astragalus capax</i> Maassoumi                     | Fabaceae | Irano-Turanian | Al         | Chamaephyte     | NO  |
| 403 | <i>Astragalus capito</i> Boiss.                       | Fabaceae | Irano-Turanian | Al         | Hemicryptophyte | YES |
| 404 | <i>Astragalus carmanicus</i> Bornm.                   | Fabaceae | Irano-Turanian | Ke         | Chamaephyte     | NO  |
| 405 | <i>Astragalus catacamptus</i> Bunge                   | Fabaceae | Irano-Turanian | Al, Ko, Za | Hemicryptophyte | NO  |
| 406 | <i>Astragalus cemerinus</i> Beck                      | Fabaceae | Irano-Turanian | Za         | Chamaephyte     | NO  |
| 407 | <i>Astragalus cephalanthus</i> DC.                    | Fabaceae | Irano-Turanian | Za, Ke     | Chamaephyte     | NO  |
| 408 | <i>Astragalus chaetopodus</i> Bunge                   | Fabaceae | Irano-Turanian | Za         | Hemicryptophyte | YES |
| 409 | <i>Astragalus chahartaghensis</i> Maassoumi & Podlech | Fabaceae | Irano-Turanian | Za         | Hemicryptophyte | NO  |
| 410 | <i>Astragalus chalaranthus</i> Boiss. & Hauskn.       | Fabaceae | Irano-Turanian | Za         | Chamaephyte     | YES |
| 411 | <i>Astragalus chaldoranicus</i> Podlech & Maassoumi   | Fabaceae | Irano-Turanian | Az         | Hemicryptophyte | YES |
| 412 | <i>Astragalus chartostegius</i> Boiss. & Hauskn.      | Fabaceae | Irano-Turanian | Za         | Chamaephyte     | NO  |
| 413 | <i>Astragalus chehregani</i> Zarre & Podlech          | Fabaceae | Irano-Turanian | Az         | Chamaephyte     | YES |
| 414 | <i>Astragalus chichesticus</i> Podlech & Maassoumi    | Fabaceae | Irano-Turanian | Az         | Hemicryptophyte | YES |
| 415 | <i>Astragalus chrysanthus</i> Boiss. & Hohen.         | Fabaceae | Irano-Turanian | Al         | Hemicryptophyte | NO  |
| 416 | <i>Astragalus chrysotrichus</i> Boiss.                | Fabaceae | Irano-Turanian | Za         | Hemicryptophyte | NO  |
| 417 | <i>Astragalus ciceropsis</i> Hamzehee & Maassoumi     | Fabaceae | Irano-Turanian | Za         | Hemicryptophyte | YES |
| 418 | <i>Astragalus circumlacustris</i> Podlech & Sytin     | Fabaceae | Irano-Turanian | Az         | Hemicryptophyte | YES |
| 419 | <i>Astragalus clivicola</i> Podlech & Maassoumi       | Fabaceae | Irano-Turanian | Za         | Hemicryptophyte | YES |

|     |                                                               |          |                |        |                 |     |
|-----|---------------------------------------------------------------|----------|----------------|--------|-----------------|-----|
| 420 | <i>Astragalus coluteopsis</i> Parsa                           | Fabaceae | Irano-Turanian | Za     | Chamaephyte     | YES |
| 421 | <i>Astragalus confertifomis</i> Širj. & Rech.f.               | Fabaceae | Irano-Turanian | Za, Ke | Hemicryptophyte | NO  |
| 422 | <i>Astragalus confusus</i> Bunge                              | Fabaceae | Irano-Turanian | Al     | Hemicryptophyte | NO  |
| 423 | <i>Astragalus controversus</i> Maassoumi & Podlech            | Fabaceae | Irano-Turanian | Ko     | Hemicryptophyte | YES |
| 424 | <i>Astragalus craccinopsis</i> Maassoumi                      | Fabaceae | Irano-Turanian | Za     | Hemicryptophyte | YES |
| 425 | <i>Astragalus crispus</i> Ghahrem.                            | Fabaceae | Irano-Turanian |        | Hemicryptophyte | YES |
| 426 | <i>Astragalus culminatus</i> Maassoumi, Kaz.Osaloo & Joharchi | Fabaceae | Irano-Turanian | Ko     | Hemicryptophyte | YES |
| 427 | <i>Astragalus curviflorus</i> Boiss.                          | Fabaceae | Irano-Turanian | Za     | Chamaephyte     | NO  |
| 428 | <i>Astragalus cyclophyllon</i> Beck                           | Fabaceae | Irano-Turanian | Az, Za | Hemicryptophyte | NO  |
| 429 | <i>Astragalus cystosus</i> Zarre & Podlech                    | Fabaceae | Irano-Turanian | Ko     | Chamaephyte     | YES |
| 430 | <i>Astragalus daenensis</i> Boiss.                            | Fabaceae | Irano-Turanian | Za, Ke | Hemicryptophyte | NO  |
| 431 | <i>Astragalus daghdaghabadensis</i> Maassoumi                 | Fabaceae | Irano-Turanian | Az, Za | Hemicryptophyte | NO  |
| 432 | <i>Astragalus damghanensis</i> Podlech                        | Fabaceae | Irano-Turanian | Al     | Hemicryptophyte | YES |
| 433 | <i>Astragalus darlingtonii</i> Podlech                        | Fabaceae | Irano-Turanian | Za     | Hemicryptophyte | NO  |
| 434 | <i>Astragalus darrehbidensis</i> Podlech & Zarre              | Fabaceae | Irano-Turanian | Ke     | Hemicryptophyte | YES |
| 435 | <i>Astragalus delutulus</i> Maassoumi                         | Fabaceae | Irano-Turanian | Za     | Hemicryptophyte | NO  |
| 436 | <i>Astragalus demavendicola</i> Bornm. & Gauba                | Fabaceae | Irano-Turanian | Za, Al | Chamaephyte     | NO  |
| 437 | <i>Astragalus demavendicus</i> Boiss. & Buhse                 | Fabaceae | Irano-Turanian | Al     | Hemicryptophyte | NO  |
| 438 | <i>Astragalus demonstratus</i> Maassoumi                      | Fabaceae | Irano-Turanian | Az     | Chamaephyte     | YES |
| 439 | <i>Astragalus dengolanensis</i> Podlech                       | Fabaceae | Irano-Turanian | Za     | Hemicryptophyte | YES |
| 440 | <i>Astragalus denticulatus</i> Podlech                        | Fabaceae | Irano-Turanian | Ko     | Hemicryptophyte | YES |
| 441 | <i>Astragalus dianat-nejadii</i> Ghahrem.                     | Fabaceae | Irano-Turanian | Az     | Chamaephyte     | YES |
| 442 | <i>Astragalus dictyolobus</i> Bunge                           | Fabaceae | Irano-Turanian | Az, Al | Hemicryptophyte | NO  |
| 443 | <i>Astragalus distans</i> Fisch.                              | Fabaceae | Irano-Turanian | Za     | Chamaephyte     | YES |
| 444 | <i>Astragalus divandarrehensis</i> Podlech                    | Fabaceae | Irano-Turanian | Za     | Hemicryptophyte | NO  |
| 445 | <i>Astragalus diversipilosus</i> Podlech                      | Fabaceae | Irano-Turanian | Za     | Hemicryptophyte | YES |
| 446 | <i>Astragalus diversus</i> Podlech & Maassoumi                | Fabaceae | Irano-Turanian | Az     | Hemicryptophyte | YES |
| 447 | <i>Astragalus doghrunensis</i> Maassoumi & Podlech            | Fabaceae | Irano-Turanian | Az     | Chamaephyte     | YES |
| 448 | <i>Astragalus dopolanicus</i> Podlech                         | Fabaceae | Irano-Turanian | Za     | Hemicryptophyte | YES |
| 449 | <i>Astragalus dorudensis</i> Zarre & Podlech                  | Fabaceae | Irano-Turanian | Za     | Hemicryptophyte | YES |
| 450 | <i>Astragalus doshman-ziariensis</i> Maassoumi & Podlech      | Fabaceae | Irano-Turanian | Za     | Hemicryptophyte | YES |



|     |                                                                       |          |                                   |            |                 |     |
|-----|-----------------------------------------------------------------------|----------|-----------------------------------|------------|-----------------|-----|
| 451 | <i>Astragalus dschuparensis</i> Freyn & Bornm.                        | Fabaceae | Irano-Turanian                    | Ke         | Chamaephyte     | NO  |
| 452 | <i>Astragalus durandianus</i> Aitch. & Baker                          | Fabaceae | Irano-Turanian                    | Al, Ko, Lo | Chamaephyte     | NO  |
| 453 | <i>Astragalus dysbatophilus</i> Zarre & Podlech                       | Fabaceae | Irano-Turanian                    | Az         | Hemicryptophyte | YES |
| 454 | <i>Astragalus ebenoides</i> Boiss.                                    | Fabaceae | Irano-Turanian                    | Az, Za     | Chamaephyte     | NO  |
| 455 | <i>Astragalus ebrahimabadensis</i> Zarre & Podlech                    | Fabaceae | Irano-Turanian                    | Za         | Hemicryptophyte | YES |
| 456 | <i>Astragalus eburneus</i> Bornm. & Gauba                             | Fabaceae | Saharo-Sindian                    |            | Hemicryptophyte | NO  |
| 457 | <i>Astragalus ecbatanus</i> Bunge                                     | Fabaceae | Irano-Turanian                    | Za         | Chamaephyte     | NO  |
| 458 | <i>Astragalus echidna</i> Bunge                                       | Fabaceae | Irano-Turanian                    | Ko, Lo     | Chamaephyte     | NO  |
| 459 | <i>Astragalus edmondsonii</i> Podlech                                 | Fabaceae | Irano-Turanian                    | Ko         | Hemicryptophyte | YES |
| 460 | <i>Astragalus elezgensis</i> Maassoumi & Kaz.Osaloo                   | Fabaceae | Irano-Turanian                    | Za         | Hemicryptophyte | NO  |
| 461 | <i>Astragalus elwendicus</i> Bornm.                                   | Fabaceae | Irano-Turanian                    | Za         | Hemicryptophyte | NO  |
| 462 | <i>Astragalus erinifolius</i> Pau                                     | Fabaceae | Irano-Turanian                    | Za         | Chamaephyte     | YES |
| 463 | <i>Astragalus eriopodus</i> Boiss.                                    | Fabaceae | Irano-Turanian                    | Az, Za, Al | Hemicryptophyte | NO  |
| 464 | <i>Astragalus eriostomus</i> Bornm.                                   | Fabaceae | Irano-Turanian                    | Za         | Chamaephyte     | NO  |
| 465 | <i>Astragalus erubescens</i> Podlech                                  | Fabaceae | Irano-Turanian                    | Ko         | Hemicryptophyte | NO  |
| 466 | <i>Astragalus erwinii-gaubae</i> Širj. & Rech.f.                      | Fabaceae | Irano-Turanian                    | Al         | Chamaephyte     | NO  |
| 467 | <i>Astragalus erythrolepis</i> Boiss.                                 | Fabaceae | Irano-Turanian                    | Za         | Chamaephyte     | YES |
| 468 | <i>Astragalus esferayenicus</i> Podlech & Maassoumi                   | Fabaceae | Irano-Turanian                    | Ko         | Hemicryptophyte | YES |
| 469 | <i>Astragalus estahbanensis</i> Maassoumi & Podlech                   | Fabaceae | Irano-Turanian                    | Za         | Hemicryptophyte | YES |
| 470 | <i>Astragalus eusarathron</i> I.Deml & Podlech                        | Fabaceae | Irano-Turanian                    | Za         | Hemicryptophyte | YES |
| 471 | <i>Astragalus evanensis</i> Maassoumi & Podlech                       | Fabaceae | Irano-Turanian                    | Al         | Hemicryptophyte | YES |
| 472 | <i>Astragalus expetitus</i> Maassoumi                                 | Fabaceae | Irano-Turanian                    | Az, Za     | Chamaephyte     | NO  |
| 473 | <i>Astragalus expectatus</i> Maassoumi                                | Fabaceae | Irano-Turanian                    | Za         | Hemicryptophyte | YES |
| 474 | <i>Astragalus facetus</i> Maassoumi & Podlech                         | Fabaceae | Irano-Turanian                    | Za         | Hemicryptophyte | YES |
| 475 | <i>Astragalus fagh-soleimanensis</i> Maassoumi & Podlech              | Fabaceae | Irano-Turanian                    | Az, Za     | Hemicryptophyte | NO  |
| 476 | <i>Astragalus farsicus</i> Širj. & Rech.f.                            | Fabaceae | Irano-Turanian,<br>Saharo-Sindian | Ke         | Chamaephyte     | NO  |
| 477 | <i>Astragalus fasciculifolius</i> Boiss.                              | Fabaceae | Irano-Turanian                    | Za         | Chamaephyte     | NO  |
| 478 | <i>Astragalus fausicola</i> Podlech ex Bagheri, Massoumi & F.Ghahrem. | Fabaceae | Irano-Turanian                    | Za         | Hemicryptophyte | YES |
| 479 | <i>Astragalus ferruminatus</i> Maassoumi                              | Fabaceae | Irano-Turanian                    | Za         | Chamaephyte     | YES |
| 480 | <i>Astragalus filifoliolatus</i> Maassoumi                            | Fabaceae | Irano-Turanian                    | Za         | Chamaephyte     | YES |

|     |                                                                           |          |                                   |                |                 |     |
|-----|---------------------------------------------------------------------------|----------|-----------------------------------|----------------|-----------------|-----|
| 481 | <i>Astragalus firuzkuhensis</i> Podlech                                   | Fabaceae | Irano-Turanian                    | Al             | Hemicryptophyte | YES |
| 482 | <i>Astragalus fischeri</i> Buhse                                          | Fabaceae | Irano-Turanian                    | Za             | Chamaephyte     | NO  |
| 483 | <i>Astragalus flexilipes</i> Bornm.                                       | Fabaceae | Irano-Turanian                    | Za             | Chamaephyte     | YES |
| 484 | <i>Astragalus floccosus</i> Boiss                                         | Fabaceae | Irano-Turanian                    | Za, Al, Ko, Ke | Chamaephyte     | NO  |
| 485 | <i>Astragalus foliosus</i> Podlech, Maassoumi & Ranjbar                   | Fabaceae | Irano-Turanian                    | Az             | Hemicryptophyte | YES |
| 486 | <i>Astragalus fortuitus</i> Maassoumi                                     | Fabaceae | Irano-Turanian                    | Za             | Hemicryptophyte | YES |
| 487 | <i>Astragalus fragiferus</i> Bunge                                        | Fabaceae | Irano-Turanian                    | Za, Ke         | Chamaephyte     | NO  |
| 488 | <i>Astragalus fridae</i> Rech.f.                                          | Fabaceae | Irano-Turanian                    | Al             | Hemicryptophyte | YES |
| 489 | <i>Astragalus fuliginosus</i> Beck                                        | Fabaceae | Irano-Turanian                    | Az, Al         | Hemicryptophyte | NO  |
| 490 | <i>Astragalus gagnieui</i> Maassoumi & Podlech                            | Fabaceae | Irano-Turanian                    | Za             | Hemicryptophyte | YES |
| 491 | <i>Astragalus gamasiabensis</i> Maassoumi, Zarre & Podlech                | Fabaceae | Irano-Turanian                    | Za             | Chamaephyte     | YES |
| 492 | <i>Astragalus gandomanicus</i> Podlech                                    | Fabaceae | Irano-Turanian                    | Za             | Hemicryptophyte | YES |
| 493 | <i>Astragalus garmashubensis</i> Maassoumi & Khorrami                     | Fabaceae | Irano-Turanian                    | Za             | Hemicryptophyte | YES |
| 494 | <i>Astragalus gaubae</i> Bornm.                                           | Fabaceae | Irano-Turanian,<br>Saharo-Sindian | Za             | Hemicryptophyte | YES |
| 495 | <i>Astragalus ghahremanii</i> Maassoumi & Podlech                         | Fabaceae | Saharo-Sindian                    |                | Hemicryptophyte | NO  |
| 496 | <i>Astragalus ghamishluensis</i> Dastpak, Maassoumi & Kaz.Osaloo          | Fabaceae | Irano-Turanian                    | Za             | Chamaephyte     | YES |
| 497 | <i>Astragalus ghashghaicus</i> Tietz & Zarre                              | Fabaceae | Irano-Turanian                    | Za             | Chamaephyte     | NO  |
| 498 | <i>Astragalus ghouchanensis</i> Souzani, Zarre & Maassoumi                | Fabaceae | Irano-Turanian                    | Ko             | Chamaephyte     | YES |
| 499 | <i>Astragalus gifanicus</i> Maassoumi & Podlech                           | Fabaceae | Irano-Turanian                    | Ko             | Hemicryptophyte | YES |
| 500 | <i>Astragalus gigantifoliolatus</i> Maassoumi & Marofi                    | Fabaceae | Irano-Turanian                    | Za             | Hemicryptophyte | YES |
| 501 | <i>Astragalus gigantirostratus</i> Maassoumi, Ghahr., Ghahrem. & F.Matin. | Fabaceae | Irano-Turanian                    | Al             | Chamaephyte     | YES |
| 502 | <i>Astragalus gilvanensis</i> Ranjbar & Nouri                             | Fabaceae | Irano-Turanian                    |                | Hemicryptophyte | YES |
| 503 | <i>Astragalus glaucacanthos</i> Fisch.                                    | Fabaceae | Irano-Turanian                    | Za, Al, Ke     | Chamaephyte     | NO  |
| 504 | <i>Astragalus glaucops</i> Bornm.                                         | Fabaceae | Irano-Turanian                    | Za             | Chamaephyte     | NO  |
| 505 | <i>Astragalus glaucopsiformis</i> Maassoumi                               | Fabaceae | Irano-Turanian                    | Za             | Chamaephyte     | YES |
| 506 | <i>Astragalus glochidiatus</i> Maassoumi                                  | Fabaceae | Irano-Turanian                    | Za             | Hemicryptophyte | YES |
| 507 | <i>Astragalus glumaceus</i> Boiss.                                        | Fabaceae | Irano-Turanian                    | Az, Za         | Chamaephyte     | NO  |
| 508 | <i>Astragalus griseus</i> Boiss.                                          | Fabaceae | Irano-Turanian                    | Za, Ke, Lo     | Hemicryptophyte | NO  |
| 509 | <i>Astragalus gueldenstaedtia</i> Bunge                                   | Fabaceae | Irano-Turanian                    | Al             | Hemicryptophyte | YES |
| 510 | <i>Astragalus gululsaranii</i> Podlech                                    | Fabaceae | Irano-Turanian                    | Ko             | Hemicryptophyte | YES |

|     |                                                     |          |                |        |                 |     |
|-----|-----------------------------------------------------|----------|----------------|--------|-----------------|-----|
| 511 | <i>Astragalus gypsaceus</i> Beck                    | Fabaceae | Irano-Turanian | Az, Za | Hemicryptophyte | NO  |
| 512 | <i>Astragalus gypsocola</i> Maassoumi & Mozaff.     | Fabaceae | Saharo-Sindian |        | Hemicryptophyte | YES |
| 513 | <i>Astragalus hajiabadensis</i> Podlech & Maassoumi | Fabaceae | Irano-Turanian |        | Hemicryptophyte | YES |
| 514 | <i>Astragalus hajjifanensis</i> Maassoumi           | Fabaceae | Irano-Turanian | Az     | Hemicryptophyte | YES |
| 515 | <i>Astragalus hamadanus</i> Boiss.                  | Fabaceae | Irano-Turanian | Al, Za | Hemicryptophyte | NO  |
| 516 | <i>Astragalus hamadryadis</i> Podlech               | Fabaceae | Irano-Turanian | Al     | Hemicryptophyte | YES |
| 517 | <i>Astragalus harazensis</i> Zarre & Podlech        | Fabaceae | Irano-Turanian | Al, Ko | Hemicryptophyte | YES |
| 518 | <i>Astragalus hecatae</i> Zarre & Podlech           | Fabaceae | Irano-Turanian | Za     | Hemicryptophyte | YES |
| 519 | <i>Astragalus heinzianus</i> Maassoumi & Mozaff.    | Fabaceae | Saharo-Sindian |        | Hemicryptophyte | YES |
| 520 | <i>Astragalus hekmat-Safaviae</i> Ghahrem.          | Fabaceae | Irano-Turanian | Ko     | Chamaephyte     | YES |
| 521 | <i>Astragalus herbertii</i> Maassoumi               | Fabaceae | Irano-Turanian | Al     | Hemicryptophyte | YES |
| 522 | <i>Astragalus hermannii</i> Freitag & Podlech       | Fabaceae | Irano-Turanian | Al, Ko | Hemicryptophyte | YES |
| 523 | <i>Astragalus heterodoxus</i> Bunge                 | Fabaceae | Irano-Turanian | Ke     | Hemicryptophyte | NO  |
| 524 | <i>Astragalus heterophyllus</i> Podlech             | Fabaceae | Irano-Turanian | Za     | Hemicryptophyte | NO  |
| 525 | <i>Astragalus hirticalyx</i> Boiss.                 | Fabaceae | Irano-Turanian | Az     | Chamaephyte     | NO  |
| 526 | <i>Astragalus hirtus</i> Bunge                      | Fabaceae | Irano-Turanian | Za     | Hemicryptophyte | YES |
| 527 | <i>Astragalus holopsilus</i> Bunge                  | Fabaceae | Irano-Turanian | Za     | Hemicryptophyte | NO  |
| 528 | <i>Astragalus holosemius</i> Bunge                  | Fabaceae | Irano-Turanian | Az     | Hemicryptophyte | NO  |
| 529 | <i>Astragalus homandicus</i> Maassoumi & Podlech    | Fabaceae | Irano-Turanian | Al     | Hemicryptophyte | YES |
| 530 | <i>Astragalus horridus</i> Boiss.                   | Fabaceae | Irano-Turanian | Za, Ke | Chamaephyte     | NO  |
| 531 | <i>Astragalus hotkanensis</i> Maassoumi & Mirtadz.  | Fabaceae | Irano-Turanian | Ke     | Chamaephyte     | YES |
| 532 | <i>Astragalus huthianus</i> Freyn & Bornm.          | Fabaceae | Irano-Turanian | Ke     | Hemicryptophyte | NO  |
| 533 | <i>Astragalus hymenocalyx</i> Boiss.                | Fabaceae | Irano-Turanian | Za     | Hemicryptophyte | NO  |
| 534 | <i>Astragalus hymenostegis</i> Fisch. & C.A. Mey.   | Fabaceae | Irano-Turanian | Az     | Chamaephyte     | NO  |
| 535 | <i>Astragalus hypsogeton</i> Bunge                  | Fabaceae | Irano-Turanian | Ko     | Chamaephyte     | YES |
| 536 | <i>Astragalus ibicinus</i> Boiss. & Hausskn.        | Fabaceae | Irano-Turanian | Za     | Hemicryptophyte | NO  |
| 537 | <i>Astragalus icmadophilus</i> Hand.-Mazz.          | Fabaceae | Irano-Turanian | Az, Al | Chamaephyte     | YES |
| 538 | <i>Astragalus ignotus</i> Podlech                   | Fabaceae | Irano-Turanian | Az     | Hemicryptophyte | YES |
| 539 | <i>Astragalus ilachchiensis</i> Ranjbar & Zarin     | Fabaceae | Irano-Turanian | Az     | Hemicryptophyte | YES |
| 540 | <i>Astragalus imbecillus</i> Maassoumi & Podlech    | Fabaceae | Irano-Turanian | Ke     | Hemicryptophyte | YES |
| 541 | <i>Astragalus impexus</i> Podlech                   | Fabaceae | Irano-Turanian | Za, Ke | Hemicryptophyte | NO  |

|     |                                                        |          |                |                |                 |     |
|-----|--------------------------------------------------------|----------|----------------|----------------|-----------------|-----|
| 542 | <i>Astragalus inchebroonensis</i> Maassoumi            | Fabaceae | Euro-Siberian  |                | Chamaephyte     | YES |
| 543 | <i>Astragalus indistinctus</i> Podlech & Maassoumi     | Fabaceae | Irano-Turanian | Za             | Hemicryptophyte | NO  |
| 544 | <i>Astragalus inexpectatus</i> Maassoumi & Podlech     | Fabaceae | Irano-Turanian | Za             | Hemicryptophyte | YES |
| 545 | <i>Astragalus inexpectatus</i> Maassoumi & Podlech     | Fabaceae | Irano-Turanian | Za             | Hemicryptophyte | NO  |
| 546 | <i>Astragalus innotabilis</i> Podlech                  | Fabaceae | Irano-Turanian | Az             | Hemicryptophyte | YES |
| 547 | <i>Astragalus inquilinus</i> Maassoumi                 | Fabaceae | Irano-Turanian | Za             | Hemicryptophyte | YES |
| 548 | <i>Astragalus insularis-ashkii</i> Maassoumi & Podlech | Fabaceae | Irano-Turanian | Za             | Hemicryptophyte | YES |
| 549 | <i>Astragalus iodotropis</i> Boiss. & Hohen.           | Fabaceae | Irano-Turanian | Al             | Chamaephyte     | NO  |
| 550 | <i>Astragalus iranicus</i> Bunge                       | Fabaceae | Irano-Turanian | Az, Za, Al, Ko | Hemicryptophyte | NO  |
| 551 | <i>Astragalus iranshahrii</i> Maassoumi & Podlech      | Fabaceae | Irano-Turanian | Za             | Hemicryptophyte | NO  |
| 552 | <i>Astragalus ischredensis</i> Bunge                   | Fabaceae | Irano-Turanian | Za             | Hemicryptophyte | NO  |
| 553 | <i>Astragalus issatissensis</i> Maassoumi & Mahmoodi   | Fabaceae | Irano-Turanian | Ke             | Hemicryptophyte | YES |
| 554 | <i>Astragalus jacobsii</i> Podlech                     | Fabaceae | Irano-Turanian | Az, Za         | Hemicryptophyte | NO  |
| 555 | <i>Astragalus jamzadiae</i> Maassoumi                  | Fabaceae | Irano-Turanian | Za             | Chamaephyte     | YES |
| 556 | <i>Astragalus jaskensis</i> Maassoumi                  | Fabaceae | Saharo-Sindian |                | Phanerophyte    | YES |
| 557 | <i>Astragalus jesdianus</i> Boiss. & Buhse             | Fabaceae | Irano-Turanian | Ke, Lo         | Chamaephyte     | NO  |
| 558 | <i>Astragalus jessenii</i> Bunge                       | Fabaceae | Irano-Turanian | Al             | Hemicryptophyte | NO  |
| 559 | <i>Astragalus johannis</i> Boiss.                      | Fabaceae | Irano-Turanian | Za, Ke         | Hemicryptophyte | NO  |
| 560 | <i>Astragalus joharchii</i> Ghahrem.-Nejad & Gaskin    | Fabaceae | Irano-Turanian | Ko             | Chamaephyte     | NO  |
| 561 | <i>Astragalus juladakensis</i> Maassoumi               | Fabaceae | Irano-Turanian | Al             | Chamaephyte     | YES |
| 562 | <i>Astragalus kabutarlanensis</i> Dehshiri & Maassoumi | Fabaceae | Irano-Turanian | Za             | Hemicryptophyte | YES |
| 563 | <i>Astragalus kadschoroides</i> Ranjbar                | Fabaceae | Irano-Turanian | Az             | Chamaephyte     | YES |
| 564 | <i>Astragalus kalatehensis</i> Maassoumi & Kaz.Osaloo  | Fabaceae | Irano-Turanian | Ko             | Hemicryptophyte | YES |
| 565 | <i>Astragalus karl-heinzii</i> Maassoumi               | Fabaceae | Irano-Turanian | Az             | Chamaephyte     | YES |
| 566 | <i>Astragalus kashafensis</i> Podlech                  | Fabaceae | Irano-Turanian | Ko             | Hemicryptophyte | YES |
| 567 | <i>Astragalus kashmarensis</i> Maassoumi & Podlech     | Fabaceae | Irano-Turanian | Ko             | Hemicryptophyte | NO  |
| 568 | <i>Astragalus kaswinensis</i> Bornm.                   | Fabaceae | Irano-Turanian | Al             | Hemicryptophyte | YES |
| 569 | <i>Astragalus kavirensis</i> Freitag                   | Fabaceae | Irano-Turanian |                | Phanerophyte    | YES |
| 570 | <i>Astragalus kentrophyllus</i> Podlech                | Fabaceae | Saharo-Sindian |                | Chamaephyte     | NO  |
| 571 | <i>Astragalus keredjensis</i> (Bornm. & Gauba) Podl.   | Fabaceae | Irano-Turanian | Al             | Hemicryptophyte | NO  |
| 572 | <i>Astragalus kermanschahensis</i> Bornm.              | Fabaceae | Irano-Turanian | Za             | Hemicryptophyte | YES |

|     |                                                              |          |                                   |            |                 |     |
|-----|--------------------------------------------------------------|----------|-----------------------------------|------------|-----------------|-----|
| 573 | <i>Astragalus khadem-kandicus</i> Maassoumi & Podlech        | Fabaceae | Irano-Turanian                    | Az         | Hemicryptophyte | YES |
| 574 | <i>Astragalus khajehensis</i> Ghahrem.-Nejad                 | Fabaceae | Irano-Turanian                    | Az         | Hemicryptophyte | YES |
| 575 | <i>Astragalus khajiboulaghensis</i> Maassoumi                | Fabaceae | Irano-Turanian                    | Al         | Hemicryptophyte | YES |
| 576 | <i>Astragalus khaneradarensis</i> Sirj. & Rech.f.            | Fabaceae | Saharo-Sindian                    |            | Chamaephyte     | YES |
| 577 | <i>Astragalus kharvanensis</i> Ranjbar                       | Fabaceae | Irano-Turanian                    | Az         | Chamaephyte     | YES |
| 578 | <i>Astragalus khatamsaziae</i> Maassoumi                     | Fabaceae | Irano-Turanian                    | Az         | Chamaephyte     | YES |
| 579 | <i>Astragalus khongensis</i> Maassoumi, Joharchi & Podlech   | Fabaceae | Irano-Turanian                    |            | Hemicryptophyte | YES |
| 580 | <i>Astragalus khonikensis</i> Nasseh & Joharchi              | Fabaceae | Irano-Turanian                    |            | Chamaephyte     | YES |
| 581 | <i>Astragalus khoshjailensis</i> Sirj. & Rech.f.             | Fabaceae | Irano-Turanian                    | Al, Ko     | Hemicryptophyte | NO  |
| 582 | <i>Astragalus khosrowabadensis</i> Ranjbar & Karamian        | Fabaceae | Irano-Turanian                    | Za         | Hemicryptophyte | YES |
| 583 | <i>Astragalus khunsarensis</i> Zarre & Podlech               | Fabaceae | Irano-Turanian                    | Za         | Hemicryptophyte | YES |
| 584 | <i>Astragalus kiamaky-daghensis</i> Maassoumi & Podlech      | Fabaceae | Irano-Turanian                    | Az         | Hemicryptophyte | YES |
| 585 | <i>Astragalus kiviensis</i> Ranjbar & Rahimin.               | Fabaceae | Irano-Turanian                    | Az         | Chamaephyte     | YES |
| 586 | <i>Astragalus koelzii</i> Barneby                            | Fabaceae | Irano-Turanian                    | Za         | Hemicryptophyte | YES |
| 587 | <i>Astragalus kohrudicus</i> Bunge                           | Fabaceae | Irano-Turanian                    | Az, Al, Za | Chamaephyte     | NO  |
| 588 | <i>Astragalus kordloricus</i> Zarre                          | Fabaceae | Irano-Turanian                    | Za         | Chamaephyte     | NO  |
| 589 | <i>Astragalus kuhidashtehensis</i> Podlech                   | Fabaceae | Irano-Turanian                    | Al         | Hemicryptophyte | YES |
| 590 | <i>Astragalus lacus-valashti</i> Maassoumi, Podlech & Jalili | Fabaceae | Irano-Turanian                    | Al         | Hemicryptophyte | YES |
| 591 | <i>Astragalus lalesarensis</i> Bornm.                        | Fabaceae | Irano-Turanian                    | Ke         | Chamaephyte     | YES |
| 592 | <i>Astragalus lambinonii</i> Podlech                         | Fabaceae | Irano-Turanian                    | Za         | Hemicryptophyte | NO  |
| 593 | <i>Astragalus laricus</i> Boiss. & Hohen.                    | Fabaceae | Irano-Turanian                    | Al         | Therophyte      | YES |
| 594 | <i>Astragalus laristanicus</i> Bornm. & Gauba                | Fabaceae | Irano-Turanian,<br>Saharo-Sindian |            | Hemicryptophyte | NO  |
| 595 | <i>Astragalus lasiocalycinus</i> Podlech & Maassoumi         | Fabaceae | Irano-Turanian                    | Az         | Hemicryptophyte | YES |
| 596 | <i>Astragalus lateritiiformis</i> Zarre, Maassoumi & Podlech | Fabaceae | Irano-Turanian                    | Za         | Chamaephyte     | NO  |
| 597 | <i>Astragalus lateritius</i> Boiss. & Hausskn. ex Boiss.     | Fabaceae | Irano-Turanian                    | Za         | Chamaephyte     | NO  |
| 598 | <i>Astragalus latianicus</i> Maassoumi & Ranjbar             | Fabaceae | Irano-Turanian                    | Al         | Hemicryptophyte | YES |
| 599 | <i>Astragalus ledinghamii</i> Barneby                        | Fabaceae | Irano-Turanian                    | Za, Ke     | Hemicryptophyte | NO  |
| 600 | <i>Astragalus leonardii</i> Maassoumi                        | Fabaceae | Irano-Turanian                    | Za         | Hemicryptophyte | YES |
| 601 | <i>Astragalus lepidus</i> Podlech                            | Fabaceae | Irano-Turanian                    | Za         | Hemicryptophyte | YES |
| 602 | <i>Astragalus leptynticus</i> Maassoumi                      | Fabaceae | Irano-Turanian                    | Al         | Chamaephyte     | NO  |

|     |                                                           |          |                |                |                 |     |
|-----|-----------------------------------------------------------|----------|----------------|----------------|-----------------|-----|
| 603 | <i>Astragalus leucocerciformis</i> Ranjbar & Maassoumi    | Fabaceae | Irano-Turanian | Za             | Chamaephyte     | YES |
| 604 | <i>Astragalus leucophanus</i> Bornm.                      | Fabaceae | Irano-Turanian | Za             | Hemicryptophyte | YES |
| 605 | <i>Astragalus leucoptilus</i> Boiss. & Hausskn. ex Boiss. | Fabaceae | Irano-Turanian | Za             | Chamaephyte     | YES |
| 606 | <i>Astragalus lilacinus</i> Boiss.                        | Fabaceae | Irano-Turanian | Az, Al         | Hemicryptophyte | NO  |
| 607 | <i>Astragalus longicuspis</i> Bunge                       | Fabaceae | Irano-Turanian | Az             | Hemicryptophyte | NO  |
| 608 | <i>Astragalus longirostratus</i> Pau                      | Fabaceae | Irano-Turanian | Za             | Hemicryptophyte | NO  |
| 609 | <i>Astragalus longistylus</i> Bunge                       | Fabaceae | Irano-Turanian | Al, Za, Ke, Bl | Chamaephyte     | NO  |
| 610 | <i>Astragalus lurorum</i> Bornm.                          | Fabaceae | Irano-Turanian | Za             | Chamaephyte     | NO  |
| 611 | <i>Astragalus lycioides</i> Boiss.                        | Fabaceae | Irano-Turanian | Al, Ke, Ko     | Chamaephyte     | NO  |
| 612 | <i>Astragalus maabudii</i> Ranjbar                        | Fabaceae | Irano-Turanian | Za             | Hemicryptophyte | YES |
| 613 | <i>Astragalus maarofii</i> Podlech & Maassoumi            | Fabaceae | Irano-Turanian | Az             | Hemicryptophyte | YES |
| 614 | <i>Astragalus maassoumii</i> Podlech                      | Fabaceae | Irano-Turanian | Za             | Hemicryptophyte | NO  |
| 615 | <i>Astragalus macrosemius</i> Boiss. & Hohen.             | Fabaceae | Irano-Turanian | Al             | Chamaephyte     | YES |
| 616 | <i>Astragalus magistratus</i> Maassoumi, Ghahr. & Mozaff. | Fabaceae | Irano-Turanian | Al             | Chamaephyte     | NO  |
| 617 | <i>Astragalus magnibracteatus</i> Maassoumi & Maroofi     | Fabaceae | Irano-Turanian | Za             | Chamaephyte     | YES |
| 618 | <i>Astragalus maharluensis</i> Bornm. & Gauba             | Fabaceae | Irano-Turanian | Za             | Therophyte      | YES |
| 619 | <i>Astragalus mahneshanensis</i> Maassoumi & Moussavi     | Fabaceae | Irano-Turanian | Az             | Hemicryptophyte | YES |
| 620 | <i>Astragalus makuensis</i> Maassoumi, Bagheri & Rahimin. | Fabaceae | Irano-Turanian | Az             | Chamaephyte     | YES |
| 621 | <i>Astragalus managettae</i> Sirj. & Rech.f.              | Fabaceae | Irano-Turanian | Za             | Hemicryptophyte | NO  |
| 622 | <i>Astragalus marandicus</i> Podlech                      | Fabaceae | Irano-Turanian | Za             | Hemicryptophyte | YES |
| 623 | <i>Astragalus margonensis</i> Ranjbar, Rahimin. & Raufi   | Fabaceae | Irano-Turanian | Za             | Hemicryptophyte | YES |
| 624 | <i>Astragalus markasicus</i> Podlech & Maassoumi          | Fabaceae | Irano-Turanian | Az             | Hemicryptophyte | YES |
| 625 | <i>Astragalus masulehensis</i> Ranjbar & Assadi           | Fabaceae | Euro-Siberian  |                | Hemicryptophyte | YES |
| 626 | <i>Astragalus megalocystis</i> Bunge                      | Fabaceae | Irano-Turanian | Al             | Chamaephyte     | NO  |
| 627 | <i>Astragalus mehranensis</i> Maassoumi & Mozaff.         | Fabaceae | Saharo-Sindian |                | Hemicryptophyte | YES |
| 628 | <i>Astragalus mehrizianus</i> Podlech & Maassoumi         | Fabaceae | Irano-Turanian | Ke             | Hemicryptophyte | YES |
| 629 | <i>Astragalus meimandicus</i> Maassoumi & Vakili          | Fabaceae | Irano-Turanian | Ke             | Chamaephyte     | YES |
| 630 | <i>Astragalus melanocalyx</i> Boiss. & Buhse              | Fabaceae | Irano-Turanian | Za, Ke         | Hemicryptophyte | YES |
| 631 | <i>Astragalus melanodon</i> Boiss.                        | Fabaceae | Irano-Turanian | Za, Ke         | Hemicryptophyte | NO  |
| 632 | <i>Astragalus membranostipulus</i> Maassoumi              | Fabaceae | Irano-Turanian | Al             | Chamaephyte     | YES |
| 633 | <i>Astragalus memnonius</i> Maassoumi & Podlech           | Fabaceae | Irano-Turanian | Za             | Hemicryptophyte | YES |

|     |                                                                              |          |                |            |                 |     |
|-----|------------------------------------------------------------------------------|----------|----------------|------------|-----------------|-----|
| 634 | <i>Astragalus memoriosus</i> Pakravan, Nasseh & Maassoumi                    | Fabaceae | Irano-Turanian | Az         | Phanerophyte    | YES |
| 635 | <i>Astragalus meshkinensis</i> Podlech                                       | Fabaceae | Irano-Turanian | Az         | Hemicryptophyte | YES |
| 636 | <i>Astragalus microphysa</i> Boiss.                                          | Fabaceae | Irano-Turanian | Az         | Chamaephyte     | NO  |
| 637 | <i>Astragalus minutulus</i> Maassoumi                                        | Fabaceae | Irano-Turanian | Ko         | Hemicryptophyte | YES |
| 638 | <i>Astragalus mishodaghmontanus</i> Ranjbar, Karamian & Nouri                | Fabaceae | Irano-Turanian | Az         | Hemicryptophyte | YES |
| 639 | <i>Astragalus modestus</i> Boiss. & Hohen.                                   | Fabaceae | Irano-Turanian | Al         | Hemicryptophyte | NO  |
| 640 | <i>Astragalus monanthemus</i> Boiss.                                         | Fabaceae | Irano-Turanian | Al         | Hemicryptophyte | YES |
| 641 | <i>Astragalus monozyx</i> Bornm.                                             | Fabaceae | Irano-Turanian | Za         | Hemicryptophyte | YES |
| 642 | <i>Astragalus montis-bakhtiari</i> Maassoumi & Sardari                       | Fabaceae | Irano-Turanian | Za         | Hemicryptophyte | YES |
| 643 | <i>Astragalus montismishoudaghi</i> Sheikh Akbari Mehr, Ghorbani & Maassoumi | Fabaceae | Irano-Turanian | Az         | Hemicryptophyte | YES |
| 644 | <i>Astragalus montis-nacarouzii</i> Maassoumi & Maroofi                      | Fabaceae | Irano-Turanian | Za         | Chamaephyte     | YES |
| 645 | <i>Astragalus montis-parrowii</i> Maassoumi & Nemati                         | Fabaceae | Irano-Turanian | Za         | Hemicryptophyte | YES |
| 646 | <i>Astragalus montis-varvashti</i> Podlech                                   | Fabaceae | Irano-Turanian | Al         | Hemicryptophyte | YES |
| 647 | <i>Astragalus montosus</i> Maassoumi                                         | Fabaceae | Irano-Turanian | Za         | Chamaephyte     | YES |
| 648 | <i>Astragalus moussavii</i> Maassoumi, Ghahr.-Nejad & Ghahr.                 | Fabaceae | Irano-Turanian | Al         | Hemicryptophyte | YES |
| 649 | <i>Astragalus mozaffarianii</i> Maassoumi                                    | Fabaceae | Irano-Turanian | Az         | Hemicryptophyte | YES |
| 650 | <i>Astragalus mucronifolius</i> Boiss.                                       | Fabaceae | Irano-Turanian | Za, Al, Ke | Chamaephyte     | NO  |
| 651 | <i>Astragalus murinus</i> Boiss.                                             | Fabaceae | Irano-Turanian | Za         | Chamaephyte     | NO  |
| 652 | <i>Astragalus musaianus</i> Maassoumi & Joharchi                             | Fabaceae | Irano-Turanian |            | Hemicryptophyte | YES |
| 653 | <i>Astragalus mutus</i> Podlech                                              | Fabaceae | Irano-Turanian | Az         | Hemicryptophyte | YES |
| 654 | <i>Astragalus myriacanthus</i> Boiss.                                        | Fabaceae | Irano-Turanian | Za, Ke, Bl | Chamaephyte     | NO  |
| 655 | <i>Astragalus naftabensis</i> Sirj. & Rech.f.                                | Fabaceae | Irano-Turanian | Al         | Chamaephyte     | YES |
| 656 | <i>Astragalus nahavandicus</i> Maassoumi                                     | Fabaceae | Irano-Turanian | Za         | Hemicryptophyte | NO  |
| 657 | <i>Astragalus nalbandanicus</i> Podlech                                      | Fabaceae | Irano-Turanian |            | Hemicryptophyte | YES |
| 658 | <i>Astragalus neoassadianus</i> Ranjbar                                      | Fabaceae | Irano-Turanian | Ko         | Hemicryptophyte | YES |
| 659 | <i>Astragalus neochaldoranicus</i> Podlech & Maassoumi                       | Fabaceae | Irano-Turanian | Az         | Hemicryptophyte | NO  |
| 660 | <i>Astragalus neoiranshahrii</i> Maassoumi & Amini Rad                       | Fabaceae | Irano-Turanian | Az         | Hemicryptophyte | YES |
| 661 | <i>Astragalus neomaassoumianus</i> Ranjbar                                   | Fabaceae | Irano-Turanian | Za         | Hemicryptophyte | YES |
| 662 | <i>Astragalus neomobayenii</i> Maassoumi                                     | Fabaceae | Irano-Turanian | Az         | Hemicryptophyte | YES |
| 663 | <i>Astragalus neomozaaffarianii</i> Maassoumi                                | Fabaceae | Irano-Turanian | Az         | Chamaephyte     | YES |

|     |                                                                           |          |                                   |            |                 |     |
|-----|---------------------------------------------------------------------------|----------|-----------------------------------|------------|-----------------|-----|
| 664 | <i>Astragalus neopodlechii</i> Maassoumi                                  | Fabaceae | Irano-Turanian                    | Za         | Hemicryptophyte | YES |
| 665 | <i>Astragalus neosytinii</i> Ranjbar                                      | Fabaceae | Irano-Turanian                    | Ke         | Hemicryptophyte | YES |
| 666 | <i>Astragalus neyshaburensis</i> Podlech                                  | Fabaceae | Irano-Turanian                    | Ko         | Chamaephyte     | YES |
| 667 | <i>Astragalus nezva-montis</i> Podlech & Zarre                            | Fabaceae | Irano-Turanian                    | Al         | Hemicryptophyte | YES |
| 668 | <i>Astragalus nigrohirsutus</i> (Tietz & Zarre) Borjian                   | Fabaceae | Irano-Turanian                    | Za         | Chamaephyte     | YES |
| 669 | <i>Astragalus nowroozii</i> Podlech & Zarre                               | Fabaceae | Irano-Turanian                    | Ke         | Chamaephyte     | YES |
| 670 | <i>Astragalus nubicola</i> Podlech                                        | Fabaceae | Irano-Turanian                    | Al         | Hemicryptophyte | YES |
| 671 | <i>Astragalus nurabadensis</i> Maassoumi & Podlech                        | Fabaceae | Irano-Turanian                    | Za         | Hemicryptophyte | YES |
| 672 | <i>Astragalus nurensis</i> Boiss. & Buhse                                 | Fabaceae | Irano-Turanian,<br>Euro-Siberian  | Al         | Hemicryptophyte | NO  |
| 673 | <i>Astragalus ochreatus</i> Bunge                                         | Fabaceae | Irano-Turanian                    | Al, Ko     | Hemicryptophyte | NO  |
| 674 | <i>Astragalus ochrochlorus</i> Boiss. & Hohen.                            | Fabaceae | Irano-Turanian                    | Al         | Chamaephyte     | NO  |
| 675 | <i>Astragalus olangensis</i> Maassoumi & Joharchi                         | Fabaceae | Irano-Turanian                    | Al         | Hemicryptophyte | YES |
| 676 | <i>Astragalus oligoflorus</i> Maassoumi, Ghahrem. & Javadi                | Fabaceae | Irano-Turanian                    | Az         | Hemicryptophyte | YES |
| 677 | <i>Astragalus orientopersicus</i> F.Ghahrem., Joharchi, Fereid. & Hoseini | Fabaceae | Irano-Turanian                    | Ko         | Chamaephyte     | YES |
| 678 | <i>Astragalus orthocarpoides</i> Sirj. & Rech.f.                          | Fabaceae | Irano-Turanian                    | Ko         | Chamaephyte     | YES |
| 679 | <i>Astragalus ovigerus</i> Boiss.                                         | Fabaceae | Irano-Turanian                    | Za         | Chamaephyte     | YES |
| 680 | <i>Astragalus ovoideus</i> Sirj. & Rech.f.                                | Fabaceae | Irano-Turanian,<br>Saharo-Sindian | Za, Ke, Lo | Chamaephyte     | NO  |
| 681 | <i>Astragalus pakravaniae</i> Podlech & Maassoumi                         | Fabaceae | Irano-Turanian                    | Al         | Hemicryptophyte | YES |
| 682 | <i>Astragalus paralurges</i> Bunge                                        | Fabaceae | Irano-Turanian                    | Az, Za     | Chamaephyte     | NO  |
| 683 | <i>Astragalus parvarensis</i> Podlech & Sytin                             | Fabaceae | Irano-Turanian                    | Al         | Hemicryptophyte | YES |
| 684 | <i>Astragalus parvulus</i> Bornm.                                         | Fabaceae | Irano-Turanian                    | Az         | Hemicryptophyte | YES |
| 685 | <i>Astragalus passargadensis</i> Maassoumi                                | Fabaceae | Irano-Turanian                    | Za         | Chamaephyte     | YES |
| 686 | <i>Astragalus patrius</i> Maassoumi                                       | Fabaceae | Irano-Turanian                    | Az, Za, Al | Hemicryptophyte | NO  |
| 687 | <i>Astragalus paucifoliolatus</i> Podlech                                 | Fabaceae | Irano-Turanian                    | Za         | Hemicryptophyte | NO  |
| 688 | <i>Astragalus pauperiflorus</i> Bornm.                                    | Fabaceae | Irano-Turanian                    | Az         | Hemicryptophyte | NO  |
| 689 | <i>Astragalus pauxillis</i> Maassoumi & Ghahrem.                          | Fabaceae | Irano-Turanian                    | Az         | Chamaephyte     | NO  |
| 690 | <i>Astragalus pediculariformis</i> Maassoumi                              | Fabaceae | Irano-Turanian                    | Az         | Chamaephyte     | YES |
| 691 | <i>Astragalus pellitus</i> Bunge                                          | Fabaceae | Irano-Turanian                    | Al, Ko, Ke | Hemicryptophyte | NO  |
| 692 | <i>Astragalus pendulipodus</i> Ranjbar & Karamian                         | Fabaceae | Irano-Turanian                    | Az         | Chamaephyte     | YES |
| 693 | <i>Astragalus penetratus</i> Maassoumi                                    | Fabaceae | Irano-Turanian                    | Za         | Hemicryptophyte | YES |



|     |                                                                 |          |                                   |        |                 |     |
|-----|-----------------------------------------------------------------|----------|-----------------------------------|--------|-----------------|-----|
| 694 | <i>Astragalus pentanthus</i> Boiss.                             | Fabaceae | Irano-Turanian                    | Za     | Hemicryptophyte | NO  |
| 695 | <i>Astragalus perdurans</i> Podlech                             | Fabaceae | Irano-Turanian                    | Al, Ko | Hemicryptophyte | NO  |
| 696 | <i>Astragalus pereshkhoranicus</i> Maassoumi & F.Ghahrem.       | Fabaceae | Irano-Turanian                    | Az     | Chamaephyte     | YES |
| 697 | <i>Astragalus persicus</i> (DC.) Fisch. & C.A.Mey.              | Fabaceae | Irano-Turanian                    | Za     | Chamaephyte     | NO  |
| 698 | <i>Astragalus peymanii</i> Maassoumi                            | Fabaceae | Euro-Siberian                     | Za     | Chamaephyte     | YES |
| 699 | <i>Astragalus pileh-khasehensis</i> Podlech & Maassoumi         | Fabaceae | Irano-Turanian                    | Az     | Hemicryptophyte | YES |
| 700 | <i>Astragalus piranshahricus</i> Maassoumi & Podlech            | Fabaceae | Irano-Turanian                    | Za, Az | Hemicryptophyte | NO  |
| 701 | <i>Astragalus plagiophacos</i> Maassoumi & Podlech              | Fabaceae | Irano-Turanian                    | Al, Za | Hemicryptophyte | NO  |
| 702 | <i>Astragalus platyfoliolatus</i> Maassoumi                     | Fabaceae | Irano-Turanian                    | Za     | Hemicryptophyte | YES |
| 703 | <i>Astragalus platysematus</i> Bunge                            | Fabaceae | Irano-Turanian                    | Al     | Hemicryptophyte | NO  |
| 704 | <i>Astragalus plebejus</i> Boiss.                               | Fabaceae | Irano-Turanian                    | Za     | Hemicryptophyte | NO  |
| 705 | <i>Astragalus podoloboides</i> Maassoumi                        | Fabaceae | Irano-Turanian                    |        | Chamaephyte     | YES |
| 706 | <i>Astragalus podosphaerus</i> Boiss. & Hausskn.                | Fabaceae | Irano-Turanian                    | Za     | Hemicryptophyte | YES |
| 707 | <i>Astragalus poliotrichus</i> Bornm.                           | Fabaceae | Irano-Turanian                    | Za     | Hemicryptophyte | YES |
| 708 | <i>Astragalus polyanthus</i> Bunge                              | Fabaceae | Irano-Turanian                    | Az     | Chamaephyte     | YES |
| 709 | <i>Astragalus polystachys</i> Maassoumi                         | Fabaceae | Irano-Turanian                    | Az     | Chamaephyte     | YES |
| 710 | <i>Astragalus porphyrophysa</i> Bornm. & Gauba                  | Fabaceae | Irano-Turanian,<br>Saharo-Sindian |        | Chamaephyte     | NO  |
| 711 | <i>Astragalus pravitzii</i> Podlech                             | Fabaceae | Irano-Turanian                    | Za     | Hemicryptophyte | NO  |
| 712 | <i>Astragalus protectus</i> Maassoumi & Podlech                 | Fabaceae | Irano-Turanian                    | Za     | Hemicryptophyte | YES |
| 713 | <i>Astragalus pseudocapito</i> Podlech                          | Fabaceae | Irano-Turanian                    | Az     | Hemicryptophyte | YES |
| 714 | <i>Astragalus pseudocomosus</i> Maassoumi, F.Ghahrem. & Bagheri | Fabaceae | Irano-Turanian                    | Az     | Hemicryptophyte | YES |
| 715 | <i>Astragalus pseudocyclophyllus</i> Rech.f.                    | Fabaceae | Irano-Turanian                    | Al     | Hemicryptophyte | YES |
| 716 | <i>Astragalus pseudofragiferus</i> Tietz                        | Fabaceae | Saharo-Sindian                    |        | Chamaephyte     | YES |
| 717 | <i>Astragalus pseudoibicus</i> Maassoumi & Podlech              | Fabaceae | Irano-Turanian                    | Za     | Hemicryptophyte | NO  |
| 718 | <i>Astragalus pseudoindurascens</i> Sirj. & Rech.f.             | Fabaceae | Irano-Turanian                    | Ko     | Hemicryptophyte | NO  |
| 719 | <i>Astragalus pseudojohannis</i> Maassoumi & Podlech            | Fabaceae | Irano-Turanian                    | Ke     | Hemicryptophyte | YES |
| 720 | <i>Astragalus pseudokurramensis</i> Sirj. & Rech.f.             | Fabaceae | Irano-Turanian                    | Ko     | Hemicryptophyte | YES |
| 721 | <i>Astragalus pseudomacrostachys</i> Maassoumi                  | Fabaceae | Irano-Turanian                    | Az     | Hemicryptophyte | YES |
| 722 | <i>Astragalus pseudonigrescens</i> Maassoumi                    | Fabaceae | Irano-Turanian                    |        | Chamaephyte     | YES |
| 723 | <i>Astragalus pseudo-orthocarpus</i> Ranjbar & Maassoumi        | Fabaceae | Irano-Turanian                    | Al     | Chamaephyte     | YES |

|     |                                                                   |          |                                  |        |                 |     |
|-----|-------------------------------------------------------------------|----------|----------------------------------|--------|-----------------|-----|
| 724 | <i>Astragalus pseudopellitus</i> Podlech                          | Fabaceae | Irano-Turanian                   | Za     | Hemicryptophyte | YES |
| 725 | <i>Astragalus pseudopersicus</i> Podlech & Maassoumi              | Fabaceae | Irano-Turanian                   | Az     | Chamaephyte     | YES |
| 726 | <i>Astragalus pseudorobustus</i> Podlech & Maassoumi              | Fabaceae | Irano-Turanian                   | Za     | Hemicryptophyte | NO  |
| 727 | <i>Astragalus pseudoshebarensis</i> Podlech                       | Fabaceae | Irano-Turanian                   | Za, Ke | Chamaephyte     | NO  |
| 728 | <i>Astragalus pseudotortuosus</i> Tietz & Zarre                   | Fabaceae | Irano-Turanian                   | Za     | Chamaephyte     | YES |
| 729 | <i>Astragalus pseudozagrosicus</i> Maassoumi & Podlech            | Fabaceae | Irano-Turanian                   | Za     | Hemicryptophyte | NO  |
| 730 | <i>Astragalus psilostylus</i> Bunge                               | Fabaceae | Irano-Turanian                   | Az     | Chamaephyte     | NO  |
| 731 | <i>Astragalus ptychophyllus</i> Boiss.                            | Fabaceae | Irano-Turanian                   | Za     | Chamaephyte     | NO  |
| 732 | <i>Astragalus punctatus</i> Bunge                                 | Fabaceae | Irano-Turanian                   | Az     | Hemicryptophyte | NO  |
| 733 | <i>Astragalus qaratchaicus</i> Maassoumi, Ghahrem. & Javadi       | Fabaceae | Irano-Turanian                   | Az     | Hemicryptophyte | YES |
| 734 | <i>Astragalus qeydarnabiensis</i> Bagheri, F.Ghahrem. & Maassoumi | Fabaceae | Irano-Turanian                   | Az     | Chamaephyte     | YES |
| 735 | <i>Astragalus qohestanicus</i> Nasseh & Maassoumi                 | Fabaceae | Irano-Turanian                   |        | Chamaephyte     | YES |
| 736 | <i>Astragalus qorvehensis</i> Podlech                             | Fabaceae | Irano-Turanian                   | Za     | Chamaephyte     | YES |
| 737 | <i>Astragalus qoturensis</i> Podlech                              | Fabaceae | Irano-Turanian                   | Az     | Chamaephyte     | YES |
| 738 | <i>Astragalus quinquefoliolatus</i> Bunge                         | Fabaceae | Irano-Turanian                   | Za     | Hemicryptophyte | NO  |
| 739 | <i>Astragalus rahiminejadii</i> Ranjbar                           | Fabaceae | Irano-Turanian                   | Za     | Hemicryptophyte | YES |
| 740 | <i>Astragalus ranjbarii</i> Podlech                               | Fabaceae | Irano-Turanian                   | Ko     | Chamaephyte     | YES |
| 741 | <i>Astragalus rassulovae</i> Podlech                              | Fabaceae | Irano-Turanian                   | Ko, Lo | Hemicryptophyte | YES |
| 742 | <i>Astragalus raswendicus</i> Hausskn. & Bornm.                   | Fabaceae | Irano-Turanian                   | Za     | Chamaephyte     | NO  |
| 743 | <i>Astragalus razensis</i> Nasseh & Joharchi                      | Fabaceae | Irano-Turanian                   | Ko     | Hemicryptophyte | YES |
| 744 | <i>Astragalus recognitus</i> Fisch.                               | Fabaceae | Irano-Turanian,<br>Euro-Siberian | Az     | Chamaephyte     | NO  |
| 745 | <i>Astragalus reconditus</i> Podlech & Maassoumi                  | Fabaceae | Irano-Turanian                   | Za     | Hemicryptophyte | YES |
| 746 | <i>Astragalus recurvatus</i> Podlech                              | Fabaceae | Irano-Turanian                   | Za     | Hemicryptophyte | YES |
| 747 | <i>Astragalus regestus</i> Maassoumi                              | Fabaceae | Irano-Turanian                   | Za     | Hemicryptophyte | NO  |
| 748 | <i>Astragalus remotiflorus</i> Boiss.                             | Fabaceae | Irano-Turanian                   | Za, Ke | Chamaephyte     | NO  |
| 749 | <i>Astragalus remotijugus</i> Boiss. & Hohen.                     | Fabaceae | Irano-Turanian                   | Al     | Hemicryptophyte | NO  |
| 750 | <i>Astragalus remotispicatus</i> Bagheri & Maassoumi              | Fabaceae | Irano-Turanian                   | Az     | Chamaephyte     | YES |
| 751 | <i>Astragalus renzianus</i> Podlech                               | Fabaceae | Irano-Turanian                   | Ko     | Hemicryptophyte | NO  |
| 752 | <i>Astragalus repentinus</i> Ekici & Podlech                      | Fabaceae | Irano-Turanian                   | Al, Ko | Hemicryptophyte | NO  |
| 753 | <i>Astragalus reticulato-venosus</i> Maassoumi & Podlech          | Fabaceae | Irano-Turanian                   | Ko     | Hemicryptophyte | YES |

|     |                                                            |          |                |            |                 |     |
|-----|------------------------------------------------------------|----------|----------------|------------|-----------------|-----|
| 754 | <i>Astragalus reuterianus</i> Boiss.                       | Fabaceae | Irano-Turanian | Za, Ke     | Chamaephyte     | NO  |
| 755 | <i>Astragalus rhabdophorus</i> Bornm.                      | Fabaceae | Irano-Turanian | Za         | Hemicryptophyte | NO  |
| 756 | <i>Astragalus rhodosemius</i> Boiss. & Hausskn.            | Fabaceae | Irano-Turanian | Az, Za, Ke | Chamaephyte     | NO  |
| 757 | <i>Astragalus rimarum</i> Bornm.                           | Fabaceae | Irano-Turanian | Al         | Hemicryptophyte | YES |
| 758 | <i>Astragalus riouxii</i> Rech.f.                          | Fabaceae | Irano-Turanian | Za         | Hemicryptophyte | YES |
| 759 | <i>Astragalus rollovii</i> Grossh.                         | Fabaceae | Irano-Turanian | Az         | Hemicryptophyte | NO  |
| 760 | <i>Astragalus rosellus</i> Sirj. & Rech.f.                 | Fabaceae | Irano-Turanian | Al         | Chamaephyte     | NO  |
| 761 | <i>Astragalus rubriflorus</i> Bunge                        | Fabaceae | Irano-Turanian | Al         | Chamaephyte     | NO  |
| 762 | <i>Astragalus rubriphysa</i> Maassoumi & Khorrami          | Fabaceae | Irano-Turanian | Za         | Chamaephyte     | YES |
| 763 | <i>Astragalus rubrocalycinus</i> Maassoumi & Podlech       | Fabaceae | Irano-Turanian | Az         | Hemicryptophyte | NO  |
| 764 | <i>Astragalus rubrolineatus</i> Sirj. & Rech.f.            | Fabaceae | Irano-Turanian | Al         | Chamaephyte     | YES |
| 765 | <i>Astragalus rubrostriatus</i> Bunge                      | Fabaceae | Irano-Turanian | Az, Za     | Chamaephyte     | NO  |
| 766 | <i>Astragalus rudimentus</i> Maassoumi                     | Fabaceae | Irano-Turanian | Az         | Hemicryptophyte | NO  |
| 767 | <i>Astragalus rufescens</i> Freyn                          | Fabaceae | Irano-Turanian | Za, Ke     | Hemicryptophyte | NO  |
| 768 | <i>Astragalus runemarkii</i> Maassoumi & Podlech           | Fabaceae | Irano-Turanian | Az         | Hemicryptophyte | YES |
| 769 | <i>Astragalus ruscifolius</i> Boiss.                       | Fabaceae | Irano-Turanian | Za, Ke, Al | Hemicryptophyte | NO  |
| 770 | <i>Astragalus saadatabadensis</i> Podlech                  | Fabaceae | Irano-Turanian | Za         | Hemicryptophyte | YES |
| 771 | <i>Astragalus sabetii</i> Podlech & Maassoumi              | Fabaceae | Irano-Turanian | Az         | Hemicryptophyte | YES |
| 772 | <i>Astragalus saccatus</i> Boiss.                          | Fabaceae | Irano-Turanian | Za         | Hemicryptophyte | NO  |
| 773 | <i>Astragalus saetiger</i> Becht                           | Fabaceae | Irano-Turanian | Za         | Hemicryptophyte | YES |
| 774 | <i>Astragalus safavii</i> Podlech & Maassoumi              | Fabaceae | Irano-Turanian | Az         | Hemicryptophyte | NO  |
| 775 | <i>Astragalus sahendi</i> Buhse                            | Fabaceae | Irano-Turanian | Az         | Chamaephyte     | YES |
| 776 | <i>Astragalus salavatabadensis</i> Podlech                 | Fabaceae | Irano-Turanian | Za         | Chamaephyte     | YES |
| 777 | <i>Astragalus salehabadensis</i> Ranjbar & Zarin           | Fabaceae | Irano-Turanian |            | Hemicryptophyte | YES |
| 778 | <i>Astragalus sanandajianus</i> Tietz                      | Fabaceae | Irano-Turanian | Za         | Chamaephyte     | YES |
| 779 | <i>Astragalus sarabensis</i> Maassoumi & Podlech           | Fabaceae | Irano-Turanian | Az         | Hemicryptophyte | YES |
| 780 | <i>Astragalus saremii</i> Maassoumi                        | Fabaceae | Irano-Turanian | Za         | Hemicryptophyte | YES |
| 781 | <i>Astragalus sarzehensis</i> Ranjbar                      | Fabaceae | Irano-Turanian | Ke         | Hemicryptophyte | YES |
| 782 | <i>Astragalus savanatensis</i> Ranjbar, Vitek & Mahmoudian | Fabaceae | Irano-Turanian | Za         | Hemicryptophyte | YES |
| 783 | <i>Astragalus savellanicus</i> Podlech                     | Fabaceae | Irano-Turanian | Az         | Hemicryptophyte | NO  |
| 784 | <i>Astragalus scapiger</i> Ranjbar & Maassoumi             | Fabaceae | Irano-Turanian | Az, Ko     | Hemicryptophyte | NO  |

|     |                                                         |          |                |                |                 |     |
|-----|---------------------------------------------------------|----------|----------------|----------------|-----------------|-----|
| 785 | <i>Astragalus schmidii</i> Podlech                      | Fabaceae | Irano-Turanian | Ko             | Hemicryptophyte | NO  |
| 786 | <i>Astragalus sciureus</i> Boiss. & Hohen.              | Fabaceae | Irano-Turanian | Al             | Chamaephyte     | NO  |
| 787 | <i>Astragalus sclerocladus</i> Bunge                    | Fabaceae | Irano-Turanian | Za             | Chamaephyte     | YES |
| 788 | <i>Astragalus segregatus</i> Zarre & Podlech            | Fabaceae | Irano-Turanian | Za             | Hemicryptophyte | YES |
| 789 | <i>Astragalus seidabadensis</i> Bunge                   | Fabaceae | Irano-Turanian | Za             | Chamaephyte     | NO  |
| 790 | <i>Astragalus semiglabricarpus</i> Maassoumi            | Fabaceae | Irano-Turanian | Ko             | Chamaephyte     | YES |
| 791 | <i>Astragalus semilunatus</i> Podlech                   | Fabaceae | Irano-Turanian | Az             | Hemicryptophyte | YES |
| 792 | <i>Astragalus semiromensis</i> Podlech & Maassoumi      | Fabaceae | Irano-Turanian | Za             | Hemicryptophyte | NO  |
| 793 | <i>Astragalus semitarius</i> Zarre & Podlech            | Fabaceae | Irano-Turanian | Az             | Hemicryptophyte | YES |
| 794 | <i>Astragalus semnanensis</i> Bornm. & Rech.f.          | Fabaceae | Irano-Turanian | Al             | Chamaephyte     | YES |
| 795 | <i>Astragalus senilis</i> Bornm.                        | Fabaceae | Irano-Turanian | Az, Al         | Hemicryptophyte | NO  |
| 796 | <i>Astragalus shabilensis</i> Podlech & Maassoumi       | Fabaceae | Irano-Turanian | Az             | Hemicryptophyte | YES |
| 797 | <i>Astragalus shahbazanicus</i> Podlech                 | Fabaceae | Irano-Turanian | Za             | Hemicryptophyte | NO  |
| 798 | <i>Astragalus shahinii</i> Podlech & Maassoumi          | Fabaceae | Irano-Turanian | Za             | Hemicryptophyte | YES |
| 799 | <i>Astragalus shahsavarii</i> Maassoumi & Podlech       | Fabaceae | Irano-Turanian | Za             | Hemicryptophyte | YES |
| 800 | <i>Astragalus shehbazii</i> Zarre & Podlech             | Fabaceae | Irano-Turanian | Za             | Hemicryptophyte | YES |
| 801 | <i>Astragalus shuturunkuensis</i> Podlech               | Fabaceae | Irano-Turanian | Za             | Hemicryptophyte | YES |
| 802 | <i>Astragalus siahbishehensis</i> Rahimin. & Ranjbar    | Fabaceae | Irano-Turanian | Al             | Hemicryptophyte | YES |
| 803 | <i>Astragalus siahcheshmehensis</i> Maassoumi & Podlech | Fabaceae | Irano-Turanian | Az             | Hemicryptophyte | YES |
| 804 | <i>Astragalus simakanensis</i> Maassoumi & Hatami       | Fabaceae | Irano-Turanian | Za             | Chamaephyte     | YES |
| 805 | <i>Astragalus sirjaevii</i> Zarre, Maassoumi & Podlech  | Fabaceae | Irano-Turanian | Za             | Chamaephyte     | YES |
| 806 | <i>Astragalus sisakhtianus</i> Podlech & Maassoumi      | Fabaceae | Irano-Turanian | Za             | Hemicryptophyte | YES |
| 807 | <i>Astragalus sitiens</i> Bunge                         | Fabaceae | Irano-Turanian | Za, Az, Al, Ko | Hemicryptophyte | NO  |
| 808 | <i>Astragalus sivendicus</i> Podlech & Maassoumi        | Fabaceae | Irano-Turanian | Za             | Hemicryptophyte | YES |
| 809 | <i>Astragalus sojakii</i> Podlech                       | Fabaceae | Irano-Turanian | Za, Ke         | Hemicryptophyte | NO  |
| 810 | <i>Astragalus spachianiformis</i> Podlech & Maassoumi   | Fabaceae | Irano-Turanian | Ke             | Hemicryptophyte | YES |
| 811 | <i>Astragalus spachianus</i> Boiss. & Buhse             | Fabaceae | Irano-Turanian | Za, Ke, Ko     | Hemicryptophyte | NO  |
| 812 | <i>Astragalus speciosus</i> Boiss. & Hohen.             | Fabaceae | Irano-Turanian | Za             | Hemicryptophyte | NO  |
| 813 | <i>Astragalus sphaeranthus</i> Boiss.                   | Fabaceae | Irano-Turanian | Za             | Hemicryptophyte | NO  |
| 814 | <i>Astragalus stenolepis</i> Fisch.                     | Fabaceae | Irano-Turanian | Al             | Chamaephyte     | NO  |
| 815 | <i>Astragalus stenostegius</i> Boiss. & Hausskn.        | Fabaceae | Irano-Turanian | Za             | Chamaephyte     | NO  |

|     |                                                                 |          |                |                |                 |     |
|-----|-----------------------------------------------------------------|----------|----------------|----------------|-----------------|-----|
| 816 | <i>Astragalus stepporum</i> Podlech                             | Fabaceae | Saharo-Sindian |                | Hemicryptophyte | YES |
| 817 | <i>Astragalus straussii</i> Bornm.                              | Fabaceae | Irano-Turanian | Za, Al         | Chamaephyte     | NO  |
| 818 | <i>Astragalus strictissimus</i> Podlech & Zarre                 | Fabaceae | Irano-Turanian | Az             | Chamaephyte     | YES |
| 819 | <i>Astragalus subalpinus</i> Boiss. & Buhse                     | Fabaceae | Irano-Turanian | Al             | Hemicryptophyte | NO  |
| 820 | <i>Astragalus subaspadanus</i> Maassoumi, F.Ghahrem. & Bagheri  | Fabaceae | Irano-Turanian | Az             | Hemicryptophyte | YES |
| 821 | <i>Astragalus subbrevidens</i> Maassoumi                        | Fabaceae | Irano-Turanian | Ko             | Hemicryptophyte | YES |
| 822 | <i>Astragalus subglaberrimus</i> Podlech & Maassoumi            | Fabaceae | Irano-Turanian | Al             | Hemicryptophyte | YES |
| 823 | <i>Astragalus subkohrudicus</i> Maassoumi, F.Ghahrem. & Bagheri | Fabaceae | Irano-Turanian | Az             | Chamaephyte     | YES |
| 824 | <i>Astragalus submitis</i> Boiss. & Hohen.                      | Fabaceae | Irano-Turanian | Az             | Chamaephyte     | NO  |
| 825 | <i>Astragalus subpentanthus</i> Maassoumi & Podlech             | Fabaceae | Irano-Turanian | Za             | Hemicryptophyte | YES |
| 826 | <i>Astragalus subrecognitus</i> Bagheri, Maassoumi & F.Ghahrem. | Fabaceae | Irano-Turanian | Az             | Chamaephyte     | YES |
| 827 | <i>Astragalus subrosulariformis</i> Sirj. & Rech.f.             | Fabaceae | Irano-Turanian | Ko             | Hemicryptophyte | YES |
| 828 | <i>Astragalus subsecundus</i> Boiss. & Hohen.                   | Fabaceae | Irano-Turanian | Za, Al         | Hemicryptophyte | NO  |
| 829 | <i>Astragalus sumarensis</i> Maassoumi                          | Fabaceae | Saharo-Sindian |                | Chamaephyte     | YES |
| 830 | <i>Astragalus susianus</i> Boiss.                               | Fabaceae | Irano-Turanian | Za             | Chamaephyte     | NO  |
| 831 | <i>Astragalus sympileicalycinus</i> Maassoumi & Nasseh          | Fabaceae | Irano-Turanian | Ko             | Chamaephyte     | YES |
| 832 | <i>Astragalus sympileicarpus</i> Rech.f.                        | Fabaceae | Irano-Turanian | Ko             | Hemicryptophyte | NO  |
| 833 | <i>Astragalus tabrizianus</i> Buhse                             | Fabaceae | Irano-Turanian | Az, Za         | Chamaephyte     | NO  |
| 834 | <i>Astragalus taebiae</i> Zarre & Podlech                       | Fabaceae | Irano-Turanian | Az             | Hemicryptophyte | YES |
| 835 | <i>Astragalus tahbaziae</i> Zarre & Podlech                     | Fabaceae | Irano-Turanian | Za             | Hemicryptophyte | YES |
| 836 | <i>Astragalus taleshensis</i> Bidarlord, F.Ghahrem. & Maassoumi | Fabaceae | Irano-Turanian | Az             | Hemicryptophyte | YES |
| 837 | <i>Astragalus talimansurensis</i> Sirj. & Rech.f.               | Fabaceae | Saharo-Sindian |                | Chamaephyte     | NO  |
| 838 | <i>Astragalus tarumensis</i> Sirj. & Rech.f.                    | Fabaceae | Irano-Turanian | Za, Ke         | Chamaephyte     | NO  |
| 839 | <i>Astragalus teheranicus</i> Boiss & Hohen.                    | Fabaceae | Irano-Turanian | Az, Al, Za, Ke | Hemicryptophyte | NO  |
| 840 | <i>Astragalus tekabensis</i> Maassoumi & Maroofi                | Fabaceae | Irano-Turanian | Az             | Hemicryptophyte | YES |
| 841 | <i>Astragalus tenellus</i> Bunge                                | Fabaceae | Irano-Turanian | Za             | Hemicryptophyte | NO  |
| 842 | <i>Astragalus tenuiramosus</i> Podlech & Zarre                  | Fabaceae | Irano-Turanian |                | Chamaephyte     | NO  |
| 843 | <i>Astragalus tenuiscapus</i> Freyn & Bornm.                    | Fabaceae | Irano-Turanian | Za, Ke         | Hemicryptophyte | NO  |
| 844 | <i>Astragalus tenuissimus</i> Zarre & Podlech                   | Fabaceae | Irano-Turanian | Al             | Hemicryptophyte | YES |
| 845 | <i>Astragalus termeanus</i> Maassoumi & Podlech                 | Fabaceae | Saharo-Sindian |                | Hemicryptophyte | NO  |
| 846 | <i>Astragalus tietziae</i> Ghahr. & Zarre                       | Fabaceae | Irano-Turanian | Al             | Chamaephyte     | YES |

|     |                                                               |               |                                  |                |                 |     |
|-----|---------------------------------------------------------------|---------------|----------------------------------|----------------|-----------------|-----|
| 847 | <i>Astragalus torbathaydariyehensis</i> Ranjbar & Zarin       | Fabaceae      | Irano-Turanian                   | Ko             | Hemicryptophyte | YES |
| 848 | <i>Astragalus touranicus</i> Freitag & Podlech                | Fabaceae      | Irano-Turanian                   | Al, Ko         | Hemicryptophyte | NO  |
| 849 | <i>Astragalus townsendii</i> Zarre, Maassoumi & Podlech       | Fabaceae      | Irano-Turanian                   | Za             | Chamaephyte     | YES |
| 850 | <i>Astragalus trachycanthos</i> Fisch.                        | Fabaceae      | Irano-Turanian                   | Az, Al, Ke     | Chamaephyte     | NO  |
| 851 | <i>Astragalus tricholobus</i> DC.                             | Fabaceae      | Irano-Turanian                   | Az, Za, Al     | Chamaephyte     | NO  |
| 852 | <i>Astragalus turgidus</i> Podlech                            | Fabaceae      | Irano-Turanian                   | Za             | Hemicryptophyte | YES |
| 853 | <i>Astragalus tuyehensis</i> Ghahr., Maassoumi & Ghahr.-Nejad | Fabaceae      | Irano-Turanian                   | Al, Ko         | Hemicryptophyte | NO  |
| 854 | <i>Astragalus typhaeformis</i> Maassoumi                      | Fabaceae      | Irano-Turanian                   | Al             | Hemicryptophyte | YES |
| 855 | <i>Astragalus urbanus</i> Podlech & Maassoumi                 | Fabaceae      | Irano-Turanian                   | Al             | Hemicryptophyte | YES |
| 856 | <i>Astragalus vanillae</i> Boiss.                             | Fabaceae      | Irano-Turanian                   | Za, Ke         | Chamaephyte     | NO  |
| 857 | <i>Astragalus vegetus</i> Bunge                               | Fabaceae      | Irano-Turanian                   | Az, Za, Al     | Hemicryptophyte | NO  |
| 858 | <i>Astragalus veiskaramii</i> Zarre, Podlech & Sabaii         | Fabaceae      | Irano-Turanian                   | Za             | Hemicryptophyte | YES |
| 859 | <i>Astragalus vereskensis</i> Maassoumi & Podlech             | Fabaceae      | Irano-Turanian,<br>Euro-Siberian | Al             | Hemicryptophyte | NO  |
| 860 | <i>Astragalus vernaculus</i> Podlech                          | Fabaceae      | Irano-Turanian                   | Az, Za         | Chamaephyte     | NO  |
| 861 | <i>Astragalus vessalae</i> Maassoumi & Podlech                | Fabaceae      | Irano-Turanian                   |                | Hemicryptophyte | YES |
| 862 | <i>Astragalus vicinalis</i> Zarre & Podlech                   | Fabaceae      | Irano-Turanian                   | Za             | Hemicryptophyte | YES |
| 863 | <i>Astragalus vulcanicus</i> Bornm.                           | Fabaceae      | Irano-Turanian                   | Al             | Hemicryptophyte | YES |
| 864 | <i>Astragalus xiphidiopsis</i> Bornm.                         | Fabaceae      | Irano-Turanian                   | Za             | Hemicryptophyte | NO  |
| 865 | <i>Astragalus yazdii</i> (Vassilcz.) Podlech & Maassoumi      | Fabaceae      | Irano-Turanian                   | Za, Ke         | Hemicryptophyte | YES |
| 866 | <i>Astragalus yushensis</i> Sabaii, Zarre & Podlech           | Fabaceae      | Irano-Turanian                   | Al             | Chamaephyte     | YES |
| 867 | <i>Astragalus zagrosicus</i> Boiss. & Hausskn.                | Fabaceae      | Irano-Turanian                   | Az, Za         | Hemicryptophyte | NO  |
| 868 | <i>Astragalus zangoeianus</i> Maassoumi, Safavi & Nasseh      | Fabaceae      | Irano-Turanian                   | Ko             | Hemicryptophyte | YES |
| 869 | <i>Astragalus zanjanensis</i> Podlech & Maassoumi             | Fabaceae      | Irano-Turanian                   | Az             | Hemicryptophyte | NO  |
| 870 | <i>Astragalus zarjabadensis</i> Ranjbar                       | Fabaceae      | Irano-Turanian                   | Az             | Hemicryptophyte | YES |
| 871 | <i>Astragalus zarreanus</i> Ranjbar                           | Fabaceae      | Irano-Turanian                   | Za             | Chamaephyte     | YES |
| 872 | <i>Astragalus zerdanus</i> Boiss.                             | Fabaceae      | Irano-Turanian                   | Za             | Hemicryptophyte | NO  |
| 873 | <i>Astragalus zoshkensis</i> Ghahr.-Nejad                     | Fabaceae      | Irano-Turanian                   | Ko             | Chamaephyte     | YES |
| 874 | <i>Astragalus zourabadensis</i> Zarre & Podlech               | Fabaceae      | Irano-Turanian                   | Az             | Chamaephyte     | YES |
| 875 | <i>Astrodaucus persicus</i> (Boiss.) Drude                    | Apiaceae      | Irano-Turanian                   | Az, Za, Al, Ko | Hemicryptophyte | NO  |
| 876 | <i>Asyneuma multicaule</i> (Boiss.) Rech.f. & Schiman-Czeika  | Campanulaceae | Irano-Turanian                   | Za             | Hemicryptophyte | NO  |

|     |                                                                   |                 |                                  |            |                 |     |
|-----|-------------------------------------------------------------------|-----------------|----------------------------------|------------|-----------------|-----|
| 877 | <i>Atractylis delvarii</i> Mozaff.                                | Asteraceae      | Saharo-Sindian                   |            | Hemicryptophyte | YES |
| 878 | <i>Atraphaxis aucheri</i> Jaub. & Spach                           | Polygonaceae    | Irano-Turanian                   | Al         | Phanerophyte    | YES |
| 879 | <i>Atraphaxis binaludensis</i> S. Tavakkoli, Mozaff. & Kaz.Osaloo | Polygonaceae    | Irano-Turanian                   | Ko         | Phanerophyte    | YES |
| 880 | <i>Atraphaxis intricata</i> Mozaff.                               | Polygonaceae    | Irano-Turanian                   | Ko         | Phanerophyte    | YES |
| 881 | <i>Azilia eryngioides</i> (Pau) Hedge & Lamond                    | Apiaceae        | Irano-Turanian                   | Za         | Hemicryptophyte | NO  |
| 882 | <i>Ballota platyloma</i> Rech.f.                                  | Lamiaceae       | Irano-Turanian,<br>Euro-Siberian | Za         | Chamaephyte     | NO  |
| 883 | <i>Bellevalia assadii</i> Wendelbo                                | Asparagaceae    | Irano-Turanian                   | Az         | Geophyte        | YES |
| 884 | <i>Bellevalia cyanopoda</i> Wendelbo                              | Asparagaceae    | Irano-Turanian                   | Za         | Geophyte        | YES |
| 885 | <i>Bellevalia decolorans</i> Bornm.                               | Asparagaceae    | Irano-Turanian                   | Za, Al     | Geophyte        | NO  |
| 886 | <i>Bellevalia heweri</i> Wendelbo                                 | Asparagaceae    | Irano-Turanian                   | Za         | Geophyte        | YES |
| 887 | <i>Bellevalia koeiei</i> Rech.f.                                  | Asparagaceae    | Irano-Turanian                   | Za         | Geophyte        | YES |
| 888 | <i>Bellevalia multicolor</i> Wendelbo                             | Asparagaceae    | Irano-Turanian                   | Az         | Geophyte        | YES |
| 889 | <i>Bellevalia shiraziana</i> Parsa                                | Asparagaceae    | Irano-Turanian                   | Za         | Geophyte        | YES |
| 890 | <i>Bellevalia tabriziana</i> Turrill                              | Asparagaceae    | Irano-Turanian                   | Az         | Geophyte        | YES |
| 891 | <i>Bellevalia tristis</i> Bornm.                                  | Asparagaceae    | Irano-Turanian                   | Za         | Geophyte        | YES |
| 892 | <i>Bellevalia wendelboi</i> Maassoumi & Jafari                    | Asparagaceae    | Irano-Turanian                   | Za         | Geophyte        | YES |
| 893 | <i>Biarum platyspathum</i> Bornm.                                 | Araceae         | Irano-Turanian                   | Za         | Geophyte        | YES |
| 894 | <i>Biarum straussii</i> Engl.                                     | Araceae         | Irano-Turanian                   | Za         | Geophyte        | NO  |
| 895 | <i>Bienertia kavirense</i> Akhani                                 | Chenopodiaceae  | Irano-Turanian                   |            | Therophyte      | YES |
| 896 | <i>Bromus frigidus</i> Boiss. & Hausskn.                          | Poaceae         | Irano-Turanian                   | Za         | Hemicryptophyte | YES |
| 897 | <i>Brossardia papyracea</i> Boiss.                                | Brassicaceae    | Irano-Turanian                   | Za         | Hemicryptophyte | NO  |
| 898 | <i>Bufonia calycina</i> Boiss. & Hausskn.                         | Brassicaceae    | Irano-Turanian                   | Za         | Hemicryptophyte | YES |
| 899 | <i>Bufonia capitata</i> Bornm.                                    | Caryophyllaceae | Irano-Turanian                   | Za         | Chamaephyte     | YES |
| 900 | <i>Bufonia capsularis</i> Boiss. & Hausskn.                       | Caryophyllaceae | Irano-Turanian                   | Za, Al     | Chamaephyte     | NO  |
| 901 | <i>Bufonia enervis</i> Boiss.                                     | Caryophyllaceae | Irano-Turanian                   | Az, Za, Al | Chamaephyte     | NO  |
| 902 | <i>Bufonia hebecalyx</i> Boiss.                                   | Caryophyllaceae | Irano-Turanian                   | Al         | Chamaephyte     | YES |
| 903 | <i>Bufonia koelzii</i> Rech.f.                                    | Caryophyllaceae | Irano-Turanian                   | Al         | Chamaephyte     | NO  |
| 904 | <i>Bufonia kotschyana</i> Boiss.                                  | Caryophyllaceae | Irano-Turanian                   | Az, Za, Al | Chamaephyte     | NO  |
| 905 | <i>Bufonia macrocarpa</i> Ser.                                    | Caryophyllaceae | Irano-Turanian                   | Za         | Chamaephyte     | NO  |
| 906 | <i>Bufonia micrantha</i> Boiss. & Hausskn.                        | Caryophyllaceae | Irano-Turanian                   | Za         | Chamaephyte     | YES |

|     |                                                                |                 |                                   |            |                 |     |
|-----|----------------------------------------------------------------|-----------------|-----------------------------------|------------|-----------------|-----|
| 907 | <i>Bufonia stapfii</i> Borm.                                   | Caryophyllaceae | Irano-Turanian                    | Za         | Chamaephyte     | YES |
| 908 | <i>Bunium luristanicum</i> Rech.f.                             | Caryophyllaceae | Irano-Turanian                    | Za, Al, Ko | Geophyte        | NO  |
| 909 | <i>Bunium wolffii</i> Klyuikov                                 | Apiaceae        | Irano-Turanian                    | Al, Ko     | Geophyte        | NO  |
| 910 | <i>Bupleurum flexile</i> Bornm. & Gauba                        | Apiaceae        | Irano-Turanian                    | Al         | Hemicryptophyte | NO  |
| 911 | <i>Bupleurum ghahremanii</i> Mozaff.                           | Apiaceae        | Irano-Turanian                    | Al         | Hemicryptophyte | YES |
| 912 | <i>Bupleurum gilanicum</i> Mozaff.                             | Apiaceae        | Irano-Turanian                    | Al         | Hemicryptophyte | YES |
| 913 | <i>Bupleurum wolffianum</i> Borm. ex H.Wolff                   | Apiaceae        | Irano-Turanian                    | Al         | Hemicryptophyte | YES |
| 914 | <i>Caccinia actinobole</i> Bunge                               | Apiaceae        | Irano-Turanian                    | Al         | Hemicryptophyte | NO  |
| 915 | <i>Caccinia kotschy</i> Boiss.                                 | Boraginaceae    | Irano-Turanian                    | Za         | Hemicryptophyte | NO  |
| 916 | <i>Caccinia strigosa</i> Boiss.                                | Boraginaceae    | Irano-Turanian                    | Al         | Hemicryptophyte | NO  |
| 917 | <i>Calendula aurantiaca</i> Kotschy ex Boiss.                  | Boraginaceae    | Irano-Turanian                    | Za         | Therophyte      | YES |
| 918 | <i>Calligonum alatosetosum</i> Maassoumi & Kazempour           | Asteraceae      | Saharo-Sindian                    |            | Phanerophyte    | YES |
| 919 | <i>Calligonum bungei</i> Boiss.                                | Polygonaceae    | Irano-Turanian                    |            | Phanerophyte    | NO  |
| 920 | <i>Calligonum denticulatum</i> Bunge ex Boiss.                 | Polygonaceae    | Irano-Turanian                    |            | Phanerophyte    | NO  |
| 921 | <i>Calligonum laristanicum</i> Rech.f. & Schiman-Czeika        | Polygonaceae    | Saharo-Sindian                    |            | Phanerophyte    | NO  |
| 922 | <i>Calligonum persicum</i> (Boiss. & Buhse) Boiss.             | Polygonaceae    | Irano-Turanian,<br>Euro-Siberian  |            | Phanerophyte    | NO  |
| 923 | <i>Calligonum schizopterum</i> Rech.f. & Schiman-Czeika        | Polygonaceae    | Irano-Turanian,<br>Saharo-Sindian |            | Phanerophyte    | NO  |
| 924 | <i>Calligonum spinosetosum</i> Maassoumi & Batooli             | Polygonaceae    | Irano-Turanian                    |            | Phanerophyte    | YES |
| 925 | <i>Calligonum stenopterum</i> Bunge ex Boiss.                  | Polygonaceae    | Irano-Turanian                    |            | Phanerophyte    | YES |
| 926 | <i>Campanula candida</i> A.DC.                                 | Polygonaceae    | Irano-Turanian                    | Za         | Hemicryptophyte | NO  |
| 927 | <i>Campanula escalerae</i> Rech.f. & Schiman-Czeika            | Campanulaceae   | Irano-Turanian                    | Za         | Hemicryptophyte | YES |
| 928 | <i>Campanula gilliatii</i> Milne-Redh. & Turrill               | Campanulaceae   | Irano-Turanian                    | Az         | Hemicryptophyte | YES |
| 929 | <i>Campanula hermannii</i> Rech.f.                             | Campanulaceae   | Irano-Turanian                    | Za         | Hemicryptophyte | YES |
| 930 | <i>Campanula humillima</i> A.DC.                               | Campanulaceae   | Irano-Turanian                    | Za         | Hemicryptophyte | NO  |
| 931 | <i>Campanula hystricula</i> Pau                                | Campanulaceae   | Irano-Turanian                    | Za         | Chamaephyte     | YES |
| 932 | <i>Campanula kermanica</i> (Rech.f., Aellen & Esfand.) Rech.f. | Campanulaceae   | Irano-Turanian                    | Za         | Chamaephyte     | NO  |
| 933 | <i>Campanula kurdistanica</i> Advay & Maroofi                  | Campanulaceae   | Irano-Turanian                    | Za         | Hemicryptophyte | YES |
| 934 | <i>Campanula lamondiae</i> Rech.f.                             | Campanulaceae   | Irano-Turanian                    | Az         | Hemicryptophyte | YES |
| 935 | <i>Campanula lourica</i> Boiss.                                | Campanulaceae   | Irano-Turanian                    | Al         | Chamaephyte     | NO  |
| 936 | <i>Campanula luristanica</i> Freyn                             | Campanulaceae   | Irano-Turanian                    | Za         | Hemicryptophyte | NO  |



|     |                                                              |               |                                  |            |                 |     |
|-----|--------------------------------------------------------------|---------------|----------------------------------|------------|-----------------|-----|
| 937 | <i>Campanula persepolitana</i> Kotschy ex Boiss.             | Campanulaceae | Irano-Turanian                   | Za, Az     | Hemicryptophyte | NO  |
| 938 | <i>Campanula savalanica</i> Fed.                             | Campanulaceae | Irano-Turanian                   | Az         | Hemicryptophyte | YES |
| 939 | <i>Centaurea albonitens</i> Turrill                          | Campanulaceae | Irano-Turanian                   | Az         | Hemicryptophyte | NO  |
| 940 | <i>Centaurea amadanensis</i> Sch.Bip.                        | Asteraceae    | Irano-Turanian                   | Az, Za     | Hemicryptophyte | NO  |
| 941 | <i>Centaurea ardabilica</i> Ranjbar & Heydari                | Asteraceae    | Irano-Turanian                   | Az         | Hemicryptophyte | YES |
| 942 | <i>Centaurea aucheri</i> (DC.) Wagenitz                      | Asteraceae    | Irano-Turanian                   | Az, Al, Za | Hemicryptophyte | NO  |
| 943 | <i>Centaurea aziziana</i> Rech.f.                            | Asteraceae    | Irano-Turanian                   | Az, Al     | Hemicryptophyte | NO  |
| 944 | <i>Centaurea bachtiarica</i> Hayek & Bornm.                  | Asteraceae    | Irano-Turanian                   | Za         | Hemicryptophyte | YES |
| 945 | <i>Centaurea bavegehensis</i> Ranjbar & Negaresh             | Asteraceae    | Irano-Turanian                   | Za         | Hemicryptophyte | YES |
| 946 | <i>Centaurea congesta</i> Wagenitz                           | Asteraceae    | Irano-Turanian                   | Az         | Hemicryptophyte | NO  |
| 947 | <i>Centaurea elbursensis</i> Boiss. & Buhse                  | Asteraceae    | Irano-Turanian                   | Az, Al     | Hemicryptophyte | YES |
| 948 | <i>Centaurea elymaitica</i> Mozaff.                          | Asteraceae    | Saharo-Sindian                   |            | Hemicryptophyte | YES |
| 949 | <i>Centaurea gabrielae</i> (Bornm.) Wagenitz                 | Asteraceae    | Irano-Turanian                   |            | Hemicryptophyte | NO  |
| 950 | <i>Centaurea galactochroa</i> Rech.f.                        | Asteraceae    | Irano-Turanian                   | Ko         | Hemicryptophyte | YES |
| 951 | <i>Centaurea gaubae</i> (Bornm.) Wagenitz                    | Asteraceae    | Irano-Turanian                   | Al, Za     | Hemicryptophyte | NO  |
| 952 | <i>Centaurea geluensis</i> Boiss. & Hausskn. ex Boiss.       | Asteraceae    | Irano-Turanian                   | Za         | Hemicryptophyte | YES |
| 953 | <i>Centaurea ghahremanii</i> Wagenitz & Esfand.              | Asteraceae    | Irano-Turanian                   | Za         | Hemicryptophyte | YES |
| 954 | <i>Centaurea gilanica</i> Bornm.                             | Asteraceae    | Irano-Turanian                   | Az, Za, Al | Hemicryptophyte | NO  |
| 955 | <i>Centaurea golestanica</i> Akhani & Wagenitz               | Asteraceae    | Euro-Siberian                    | Al         | Hemicryptophyte | YES |
| 956 | <i>Centaurea hyrcanica</i> Bornm.                            | Asteraceae    | Euro-Siberian                    | Al         | Hemicryptophyte | NO  |
| 957 | <i>Centaurea iljinii</i> Czerniak.                           | Asteraceae    | Irano-Turanian                   | Ko         | Hemicryptophyte | YES |
| 958 | <i>Centaurea imperialis</i> Hausskn. ex Bornm.               | Asteraceae    | Irano-Turanian                   | Za, Az     | Hemicryptophyte | NO  |
| 959 | <i>Centaurea incanescens</i> (DC.) Sch.Bip.                  | Asteraceae    | Irano-Turanian                   | Az         | Hemicryptophyte | NO  |
| 960 | <i>Centaurea intricata</i> Boiss.                            | Asteraceae    | Irano-Turanian                   | Za         | Hemicryptophyte | NO  |
| 961 | <i>Centaurea irritans</i> Wagenitz                           | Asteraceae    | Irano-Turanian                   | Za         | Hemicryptophyte | NO  |
| 962 | <i>Centaurea isphanica</i> Boiss.                            | Asteraceae    | Irano-Turanian                   | Za, Ke     | Hemicryptophyte | NO  |
| 963 | <i>Centaurea kabirkuhensis</i> Mozaff., F.Ghahrem. & Fereid. | Asteraceae    | Saharo-Sindian                   |            | Hemicryptophyte | YES |
| 964 | <i>Centaurea kamyaranensis</i> Ranjbar & Negaresh            | Asteraceae    | Irano-Turanian                   | Za         | Hemicryptophyte | YES |
| 965 | <i>Centaurea kandavanensis</i> Wagenitz                      | Asteraceae    | Irano-Turanian,<br>Euro-Siberian | Al         | Hemicryptophyte | NO  |
| 966 | <i>Centaurea karamianiae</i> Negaresh                        | Asteraceae    | Irano-Turanian                   | Za         | Hemicryptophyte | YES |

|     |                                                                    |            |                                   |            |                 |     |
|-----|--------------------------------------------------------------------|------------|-----------------------------------|------------|-----------------|-----|
| 967 | <i>Centaurea khuzistanica</i> Mozaff.                              | Asteraceae | Saharo-Sindian                    | Za         | Hemicryptophyte | YES |
| 968 | <i>Centaurea koeieana</i> Bornm.                                   | Asteraceae | Irano-Turanian                    | Za         | Hemicryptophyte | NO  |
| 969 | <i>Centaurea lachnopus</i> Rech.f.                                 | Asteraceae | Irano-Turanian                    | Al         | Hemicryptophyte | YES |
| 970 | <i>Centaurea leuzeoides</i> (Jaub. & Spech) Walp.                  | Asteraceae | Irano-Turanian                    | Za, Az, Al | Hemicryptophyte | NO  |
| 971 | <i>Centaurea luristanica</i> Rech.f.                               | Asteraceae | Irano-Turanian,<br>Saharo-Sindian | Za         | Hemicryptophyte | NO  |
| 972 | <i>Centaurea microlonchoides</i> Boiss.                            | Asteraceae | Irano-Turanian                    | Az, Za, Ke | Hemicryptophyte | NO  |
| 973 | <i>Centaurea nemecii</i> Nábělek                                   | Asteraceae | Irano-Turanian                    | Za         | Therophyte      | NO  |
| 974 | <i>Centaurea ochrocephala</i> Wagenitz                             | Asteraceae | Irano-Turanian                    | Az         | Hemicryptophyte | YES |
| 975 | <i>Centaurea orumiehensis</i> Ranjbar & Negaresh                   | Asteraceae | Irano-Turanian                    | Az         | Hemicryptophyte | YES |
| 976 | <i>Centaurea pabotii</i> Wagenitz                                  | Asteraceae | Saharo-Sindian                    |            | Hemicryptophyte | NO  |
| 977 | <i>Centaurea paradoxa</i> Mozaff.                                  | Asteraceae | Irano-Turanian                    | Za         | Hemicryptophyte | YES |
| 978 | <i>Centaurea persica</i> Boiss.                                    | Asteraceae | Irano-Turanian                    | Za         | Hemicryptophyte | NO  |
| 979 | <i>Centaurea phaeopappoides</i> Bordz.                             | Asteraceae | Irano-Turanian                    | Az         | Hemicryptophyte | YES |
| 980 | <i>Centaurea phlomoides</i> Boiss. & Hausskn. ex Boiss. & Hausskn. | Asteraceae | Irano-Turanian                    | Za         | Hemicryptophyte | YES |
| 981 | <i>Centaurea rahiminejadii</i> Negaresh                            | Asteraceae | Irano-Turanian                    | Az         | Hemicryptophyte | YES |
| 982 | <i>Centaurea ravansarensis</i> Ranjbar & Negaresh                  | Asteraceae | Irano-Turanian                    | Za         | Hemicryptophyte | YES |
| 983 | <i>Centaurea salmasensis</i> Ranjbar & Heydari                     | Asteraceae | Irano-Turanian                    | Az         | Hemicryptophyte | YES |
| 984 | <i>Centaurea sanandajensis</i> Ranjbar & Negaresh                  | Asteraceae | Irano-Turanian                    | Za         | Hemicryptophyte | YES |
| 985 | <i>Centaurea schmidii</i> Wagenitz                                 | Asteraceae | Irano-Turanian                    | Ko         | Hemicryptophyte | YES |
| 986 | <i>Centaurea shahuensis</i> Ranjbar & Negaresh                     | Asteraceae | Irano-Turanian                    | Za         | Hemicryptophyte | YES |
| 987 | <i>Centaurea shehbazii</i> Ranjbar & Negaresh                      | Asteraceae | Irano-Turanian                    | Za         | Hemicryptophyte | YES |
| 988 | <i>Centaurea sintenisiana</i> Gand.                                | Asteraceae | Irano-Turanian                    | Al, Ko     | Hemicryptophyte | NO  |
| 989 | <i>Centaurea solitaria</i> Ranjbar & Negaresh                      | Asteraceae | Irano-Turanian                    | Za         | Hemicryptophyte | YES |
| 990 | <i>Centaurea sosnowskyi</i> Grossh.                                | Asteraceae | Irano-Turanian                    | Az, Za     | Hemicryptophyte | NO  |
| 991 | <i>Centaurea tabriziana</i> Ranjbar & Heydari                      | Asteraceae | Irano-Turanian                    | Az         | Hemicryptophyte | YES |
| 992 | <i>Centaurea urvillei</i> DC.                                      | Asteraceae | Irano-Turanian                    | Az         | Hemicryptophyte | NO  |
| 993 | <i>Centaurea ustulata</i> DC.                                      | Asteraceae | Irano-Turanian                    | Az, Za     | Hemicryptophyte | NO  |
| 994 | <i>Centaurea wendelboi</i> Wagenitz                                | Asteraceae | Saharo-Sindian                    |            | Hemicryptophyte | YES |
| 995 | <i>Centaurea xeranthemoides</i> Rech.f.                            | Asteraceae | Irano-Turanian                    | Za         | Hemicryptophyte | NO  |
| 996 | <i>Centaurea zagrosmontana</i> Ranjbar & Heydari                   | Asteraceae | Irano-Turanian                    | Za         | Hemicryptophyte | YES |

|      |                                                              |                  |                |            |                 |     |
|------|--------------------------------------------------------------|------------------|----------------|------------|-----------------|-----|
| 997  | <i>Centaurea zangulensis</i> Ranjbar & Negaresh              | Asteraceae       | Euro-Siberian  | Al         | Hemicryptophyte | YES |
| 998  | <i>Centaurea zuvandica</i> (Sosn.) Sosn.                     | Asteraceae       | Euro-Siberian  | Al         | Hemicryptophyte | NO  |
| 999  | <i>Cephalaria bojnordensis</i> Ranjbar & Z.Ranjbar           | Asteraceae       | Irano-Turanian | Ko         | Hemicryptophyte | YES |
| 1000 | <i>Cephalaria juncea</i> Boiss.                              | Dipsacaceae      | Irano-Turanian | Az, Za     | Hemicryptophyte | NO  |
| 1001 | <i>Cephalorrhynchus brassicifolius</i> (Boiss.) Tuisl        | Dipsacaceae      | Irano-Turanian | Al, Ko     | Hemicryptophyte | NO  |
| 1002 | <i>Cephalorrhynchus gorganicus</i> (Rech.f. & Esfand.) Tuisl | Asteraceae       | Euro-Siberian  | Al         | Hemicryptophyte | YES |
| 1003 | <i>Cephalorrhynchus kossinskyi</i> (Krasch.) Kirp.           | Asteraceae       | Irano-Turanian | Ko         | Hemicryptophyte | NO  |
| 1004 | <i>Cephalorrhynchus microcephalus</i> (DC.) Schchian         | Asteraceae       | Irano-Turanian | Az, Za, Al | Hemicryptophyte | NO  |
| 1005 | <i>Cerastium persicum</i> Boiss.                             | Asteraceae       | Irano-Turanian | Al, Za     | Hemicryptophyte | YES |
| 1006 | <i>Cerasus brachypetala</i> Boiss.                           | Caryophyllaceae  | Irano-Turanian | Az, Za     | Phanerophyte    | NO  |
| 1007 | <i>Cerasus chorossanica</i> Pojark.                          | Rosaceae         | Irano-Turanian | Ko         | Phanerophyte    | YES |
| 1008 | <i>Cerasus paradoxa</i> Dehshiri & Mozaff.                   | Rosaceae         | Irano-Turanian | Za         | Phanerophyte    | YES |
| 1009 | <i>Chaenorhinum foroughii</i> Speta                          | Rosaceae         | Irano-Turanian | Za         | Hemicryptophyte | YES |
| 1010 | <i>Chaenorhinum grossecostatum</i> Speta                     | Scrophulariaceae | Irano-Turanian | Ke         | Therophyte      | YES |
| 1011 | <i>Chaerophyllum khorossanicum</i> Czerniak. ex Schischk.    | Scrophulariaceae | Irano-Turanian | Al, Ko     | Hemicryptophyte | NO  |
| 1012 | <i>Chaerophyllum nivale</i> Hedge & Lamond                   | Apiaceae         | Irano-Turanian | Za         | Hemicryptophyte | YES |
| 1013 | <i>Chamaegeron asterellus</i> (Bornm.) Botsch.               | Apiaceae         | Irano-Turanian | Za, Ke     | Hemicryptophyte | NO  |
| 1014 | <i>Chamaegeron keredjensis</i> (Bornm. & Gauba) Grierson     | Asteraceae       | Irano-Turanian | Al         | Hemicryptophyte | YES |
| 1015 | <i>Chesneya kotschyi</i> Boiss.                              | Asteraceae       | Saharo-Sindian |            | Hemicryptophyte | YES |
| 1016 | <i>Chorispota persica</i> Boiss.                             | Fabaceae         | Irano-Turanian | Az, Za     | Therophyte      | NO  |
| 1017 | <i>Cicer spiroceras</i> Jaub. & Spach                        | Brassicaceae     | Irano-Turanian | Za, Ke, Bl | Hemicryptophyte | NO  |
| 1018 | <i>Cicer stapfianum</i> Rech.f.                              | Fabaceae         | Irano-Turanian | Za         | Hemicryptophyte | YES |
| 1019 | <i>Cicer subaphyllum</i> Boiss.                              | Fabaceae         | Irano-Turanian | Za         | Hemicryptophyte | YES |
| 1020 | <i>Cicer tragacanthoides</i> Jaub. & Spach                   | Fabaceae         | Irano-Turanian | Al, Za, Ko | Hemicryptophyte | NO  |
| 1021 | <i>Cicerbita polyclada</i> (Boiss.) Beauverd                 | Fabaceae         | Irano-Turanian | Za         | Hemicryptophyte | YES |
| 1022 | <i>Cirsium bracteosum</i> DC.                                | Asteraceae       | Irano-Turanian | Za         | Hemicryptophyte | YES |
| 1023 | <i>Cirsium gadukense</i> Petr.                               | Asteraceae       | Irano-Turanian | Al         | Hemicryptophyte | YES |
| 1024 | <i>Cirsium iranikum</i> Petr.                                | Asteraceae       | Irano-Turanian | Az         | Hemicryptophyte | YES |
| 1025 | <i>Cirsium lappaceum</i> (M.Bieb.) Fisch.                    | Asteraceae       | Irano-Turanian | Al, Az     | Hemicryptophyte | NO  |
| 1026 | <i>Cirsium pyramidale</i> Bornm.                             | Asteraceae       | Irano-Turanian | Ke         | Hemicryptophyte | YES |
| 1027 | <i>Cirsium spectabile</i> DC.                                | Asteraceae       | Irano-Turanian | Za, Ke     | Hemicryptophyte | NO  |

|      |                                                           |                |                                   |            |                 |     |
|------|-----------------------------------------------------------|----------------|-----------------------------------|------------|-----------------|-----|
| 1028 | <i>Cistanche eremodoxa</i> Bornm.                         | Asteraceae     | Irano-Turanian                    | Az, Za     | Geophyte        | YES |
| 1029 | <i>Clastopus erubescens</i> Hausskn.                      | Orobanchaceae  | Irano-Turanian                    | Za         | Hemicryptophyte | YES |
| 1030 | <i>Clastopus vestitus</i> (Desv.) Boiss.                  | Brassicaceae   | Irano-Turanian                    | Al, Za     | Chamaephyte     | NO  |
| 1031 | <i>Clematis iranica</i> Habibi, Ghorbani & Azizian        | Brassicaceae   | Irano-Turanian                    | Al         | Hemicryptophyte | YES |
| 1032 | <i>Cleome foliolosa</i> DC.                               | Ranunculaceae  | Irano-Turanian                    | Al, Za, Ke | Therophyte      | NO  |
| 1033 | <i>Codonocephalum stenocalathium</i> Rech.f.              | Cleomaceae     | Irano-Turanian                    | Az         | Hemicryptophyte | YES |
| 1034 | <i>Colchicum bakhtiaricum</i> Matin & Iranshahr           | Asteraceae     | Irano-Turanian                    | Za, Ke     | Geophyte        | YES |
| 1035 | <i>Colchicum varians</i> (Freyn & Bornm.) Dyer            | Colchicaceae   | Irano-Turanian                    | Za, Ke     | Geophyte        | NO  |
| 1036 | <i>Colchicum wendelboi</i> K.Perss.                       | Colchicaceae   | Irano-Turanian                    | Az         | Geophyte        | NO  |
| 1037 | <i>Colpodium gillettii</i> Bor                            | Colchicaceae   | Irano-Turanian                    | Az         | Hemicryptophyte | YES |
| 1038 | <i>Colpodium violaceum</i> (Boiss.) Griseb.               | Poaceae        | Irano-Turanian                    | Za, Al     | Hemicryptophyte | NO  |
| 1039 | <i>Colutea gifana</i> Parsa                               | Poaceae        | Irano-Turanian                    | Ko         | Phanerophyte    | YES |
| 1040 | <i>Colutea persica</i> Boiss.                             | Fabaceae       | Irano-Turanian                    | Al, Za, Ke | Phanerophyte    | NO  |
| 1041 | <i>Colutea porphyrogramma</i> Rech.f.                     | Fabaceae       | Irano-Turanian                    | Al, Ko     | Phanerophyte    | NO  |
| 1042 | <i>Colutea uniflora</i> Beck                              | Fabaceae       | Euro-Siberian                     | Al         | Phanerophyte    | YES |
| 1043 | <i>Consolida linarioides</i> (Boiss.) Munz                | Fabaceae       | Irano-Turanian                    | Za         | Therophyte      | YES |
| 1044 | <i>Consolida lorestanica</i> Iranshahr                    | Ranunculaceae  | Irano-Turanian                    | Za         | Therophyte      | YES |
| 1045 | <i>Consolida teheranica</i> (Boiss.) Rech.f.              | Ranunculaceae  | Irano-Turanian                    | Al         | Therophyte      | NO  |
| 1046 | <i>Consolida trigonelloides</i> (Boiss.) Munz             | Ranunculaceae  | Irano-Turanian                    | Za, Ke     | Therophyte      | NO  |
| 1047 | <i>Convolvulus ammocharis</i> Boiss. & Hausskn.           | Ranunculaceae  | Saharo-Sindian                    |            | Hemicryptophyte | YES |
| 1048 | <i>Convolvulus argyranthus</i> Rech. f., Aellen & Esfand. | Convolvulaceae | Saharo-Sindian                    |            | Chamaephyte     | YES |
| 1049 | <i>Convolvulus cephalophorus</i> Boiss.                   | Convolvulaceae | Saharo-Sindian                    |            | Hemicryptophyte | YES |
| 1050 | <i>Convolvulus elymaiticus</i> Mozaff.                    | Convolvulaceae | Saharo-Sindian                    |            | Chamaephyte     | YES |
| 1051 | <i>Convolvulus eremophilus</i> Boiss. & Buhse             | Convolvulaceae | Irano-Turanian                    |            | Chamaephyte     | NO  |
| 1052 | <i>Convolvulus gonocladus</i> Boiss.                      | Convolvulaceae | Saharo-Sindian                    |            | Hemicryptophyte | NO  |
| 1053 | <i>Convolvulus gracillimus</i> Rech.f.                    | Convolvulaceae | Irano-Turanian                    | Al         | Chamaephyte     | YES |
| 1054 | <i>Convolvulus iranicus</i> J.R.I.Wood & Scotland         | Convolvulaceae | Irano-Turanian                    | Za         | Chamaephyte     | YES |
| 1055 | <i>Convolvulus koieanus</i> Bornm.                        | Convolvulaceae | Irano-Turanian                    |            | Chamaephyte     | YES |
| 1056 | <i>Convolvulus oxysepalus</i> Boiss.                      | Convolvulaceae | Irano-Turanian,<br>Saharo-Sindian | Ke         | Chamaephyte     | NO  |
| 1057 | <i>Convolvulus schirazianus</i> Boiss.                    | Convolvulaceae | Irano-Turanian                    | Za, Az     | Hemicryptophyte | NO  |

|      |                                                                |                |                                   |            |                 |     |
|------|----------------------------------------------------------------|----------------|-----------------------------------|------------|-----------------|-----|
| 1058 | <i>Convolvulus stapfii</i> Rech.f.                             | Convolvulaceae | Saharo-Sindian                    |            | Hemicryptophyte | NO  |
| 1059 | <i>Convolvulus turrillianus</i> Parsa                          | Convolvulaceae | Irano-Turanian,<br>Saharo-Sindian |            | Chamaephyte     | NO  |
| 1060 | <i>Convolvulus urosepalus</i> Pau                              | Convolvulaceae | Irano-Turanian                    | Za         | Chamaephyte     | NO  |
| 1061 | <i>Corydalis firouzii</i> Wendelbo                             | Convolvulaceae | Irano-Turanian                    | Al         | Geophyte        | YES |
| 1062 | <i>Cotoneaster assadii</i> Khat.                               | Fumariaceae    | Euro-Siberian                     | Al         | Phanerophyte    | YES |
| 1063 | <i>Cotoneaster esfandiarrii</i> Khat.                          | Rosaceae       | Irano-Turanian                    | Al         | Phanerophyte    | YES |
| 1064 | <i>Cotoneaster persicus</i> Pojark.                            | Rosaceae       | Irano-Turanian                    | Za, Ke     | Phanerophyte    | NO  |
| 1065 | <i>Cousinia adenostegia</i> Rech.f.                            | Rosaceae       | Irano-Turanian                    | Ko         | Hemicryptophyte | YES |
| 1066 | <i>Cousinia adenosticta</i> Bornm.                             | Asteraceae     | Irano-Turanian                    | Al         | Chamaephyte     | YES |
| 1067 | <i>Cousinia aggregata</i> DC.                                  | Asteraceae     | Irano-Turanian                    | Al, Za     | Chamaephyte     | NO  |
| 1068 | <i>Cousinia akredii</i> Bornm. & Gauba                         | Asteraceae     | Irano-Turanian                    | Al         | Hemicryptophyte | YES |
| 1069 | <i>Cousinia albescens</i> Winkl. & Strauss ex Winkl.           | Asteraceae     | Irano-Turanian                    | Za         | Hemicryptophyte | YES |
| 1070 | <i>Cousinia albida</i> DC.                                     | Asteraceae     | Irano-Turanian                    | Za         | Hemicryptophyte | YES |
| 1071 | <i>Cousinia alexeenkoana</i> Bornm.                            | Asteraceae     | Irano-Turanian                    | Za, Al     | Hemicryptophyte | NO  |
| 1072 | <i>Cousinia alfredii</i> Bornm. & Gauba                        | Asteraceae     | Irano-Turanian                    | Al         | Hemicryptophyte | YES |
| 1073 | <i>Cousinia amicomum</i> Tscherneva, Joharchi & Ghahrem.-Nejad | Asteraceae     | Irano-Turanian                    | Ko         | Hemicryptophyte | YES |
| 1074 | <i>Cousinia amplissima</i> (Boiss.) Boiss.                     | Asteraceae     | Irano-Turanian                    | Az, Za, Al | Hemicryptophyte | NO  |
| 1075 | <i>Cousinia antonowii</i> C.Winkl.                             | Asteraceae     | Irano-Turanian                    | Ko         | Hemicryptophyte | YES |
| 1076 | <i>Cousinia arakensis</i> Attar & Djavadi                      | Asteraceae     | Irano-Turanian                    | Za         | Hemicryptophyte | NO  |
| 1077 | <i>Cousinia araneosa</i> DC.                                   | Asteraceae     | Irano-Turanian                    | Za, Ke     | Hemicryptophyte | NO  |
| 1078 | <i>Cousinia archibaldii</i> Rech.f.                            | Asteraceae     | Irano-Turanian                    | Za         | Chamaephyte     | NO  |
| 1079 | <i>Cousinia arctotidifolia</i> Bunge                           | Asteraceae     | Irano-Turanian                    | Ko, Al     | Hemicryptophyte | NO  |
| 1080 | <i>Cousinia ardalensis</i> Attar & Djavadi                     | Asteraceae     | Irano-Turanian                    | Za         | Hemicryptophyte | YES |
| 1081 | <i>Cousinia argentea</i> Mehregan & Assadi                     | Asteraceae     | Irano-Turanian                    | Ko         | Chamaephyte     | YES |
| 1082 | <i>Cousinia assadii</i> Attar                                  | Asteraceae     | Irano-Turanian                    | Za         | Hemicryptophyte | YES |
| 1083 | <i>Cousinia assyriaca</i> Jaub. & Spach                        | Asteraceae     | Irano-Turanian                    | Za, Az     | Hemicryptophyte | NO  |
| 1084 | <i>Cousinia atrobracteata</i> Attar                            | Asteraceae     | Irano-Turanian                    | Az         | Hemicryptophyte | YES |
| 1085 | <i>Cousinia atropatana</i> Bunge                               | Asteraceae     | Irano-Turanian                    | Az         | Hemicryptophyte | YES |
| 1086 | <i>Cousinia attariae</i> Assadi & Joharchi                     | Asteraceae     | Irano-Turanian                    | Ko         | Hemicryptophyte | YES |
| 1087 | <i>Cousinia azerbaijanica</i> Djavadi, Attar & Najafi          | Asteraceae     | Irano-Turanian                    | Az         | Hemicryptophyte | YES |

|      |                                                       |            |                |            |                 |     |
|------|-------------------------------------------------------|------------|----------------|------------|-----------------|-----|
| 1088 | <i>Cousinia bachtiarica</i> Boiss. & Hausskn.         | Asteraceae | Irano-Turanian | Za         | Hemicryptophyte | NO  |
| 1089 | <i>Cousinia barbeyi</i> C.Winkl.                      | Asteraceae | Irano-Turanian | Za         | Hemicryptophyte | YES |
| 1090 | <i>Cousinia barezica</i> Assadi                       | Asteraceae | Irano-Turanian | Ke         | Hemicryptophyte | YES |
| 1091 | <i>Cousinia bazoftensis</i> Attar                     | Asteraceae | Irano-Turanian | Za         | Hemicryptophyte | YES |
| 1092 | <i>Cousinia beauverdiana</i> Bornm.                   | Asteraceae | Irano-Turanian | Ke         | Hemicryptophyte | YES |
| 1093 | <i>Cousinia belangeri</i> DC.                         | Asteraceae | Irano-Turanian | Al, Za     | Hemicryptophyte | NO  |
| 1094 | <i>Cousinia bienerti</i> Bunge                        | Asteraceae | Irano-Turanian | Ko         | Hemicryptophyte | YES |
| 1095 | <i>Cousinia bijarensis</i> Rech.f.                    | Asteraceae | Irano-Turanian | Az         | Chamaephyte     | YES |
| 1096 | <i>Cousinia bobekii</i> Rech.f.                       | Asteraceae | Irano-Turanian | Az         | Hemicryptophyte | NO  |
| 1097 | <i>Cousinia boissieri</i> Buhse                       | Asteraceae | Irano-Turanian | Az         | Hemicryptophyte | YES |
| 1098 | <i>Cousinia brevicaulis</i> Attar, Mozaff. & Mirtadz. | Asteraceae | Irano-Turanian |            | Hemicryptophyte | YES |
| 1099 | <i>Cousinia calcitrapa</i> Boiss.                     | Asteraceae | Irano-Turanian | Az, Ke, Za | Hemicryptophyte | NO  |
| 1100 | <i>Cousinia calocephala</i> Jaub. & Spach             | Asteraceae | Irano-Turanian | Az, Al, Za | Hemicryptophyte | NO  |
| 1101 | <i>Cousinia calolepis</i> Boiss.                      | Asteraceae | Irano-Turanian | Al         | Hemicryptophyte | YES |
| 1102 | <i>Cousinia candolleana</i> Jaub. & Spach             | Asteraceae | Irano-Turanian | Za         | Hemicryptophyte | YES |
| 1103 | <i>Cousinia canescens</i> DC.                         | Asteraceae | Irano-Turanian | Az, Za     | Hemicryptophyte | NO  |
| 1104 | <i>Cousinia cavaerae</i> Bornm.                       | Asteraceae | Irano-Turanian | Ko         | Hemicryptophyte | YES |
| 1105 | <i>Cousinia chaetocephala</i> Kult.                   | Asteraceae | Irano-Turanian | Ko         | Chamaephyte     | YES |
| 1106 | <i>Cousinia chamaepeuce</i> Boiss.                    | Asteraceae | Irano-Turanian | Al         | Hemicryptophyte | NO  |
| 1107 | <i>Cousinia chlorocephala</i> C.A.Mey. ex DC.         | Asteraceae | Irano-Turanian | Az         | Hemicryptophyte | YES |
| 1108 | <i>Cousinia chlorosphaera</i> Bornm.                  | Asteraceae | Irano-Turanian | Za         | Hemicryptophyte | NO  |
| 1109 | <i>Cousinia chrysacantha</i> Jaub. & Spach            | Asteraceae | Irano-Turanian | Az         | Hemicryptophyte | NO  |
| 1110 | <i>Cousinia chrysantra</i> Bornm. & Gauba             | Asteraceae | Irano-Turanian | Ko         | Hemicryptophyte | YES |
| 1111 | <i>Cousinia commutata</i> Bunge                       | Asteraceae | Irano-Turanian | Al         | Hemicryptophyte | NO  |
| 1112 | <i>Cousinia concinna</i> Boiss. & Hausskn.            | Asteraceae | Irano-Turanian | Za         | Hemicryptophyte | NO  |
| 1113 | <i>Cousinia concolor</i> Bunge                        | Asteraceae | Irano-Turanian | Al, Ko     | Hemicryptophyte | YES |
| 1114 | <i>Cousinia contumax</i> C.Winkl. & Bornm.            | Asteraceae | Irano-Turanian | Za         | Hemicryptophyte | YES |
| 1115 | <i>Cousinia cordifolia</i> Djavadi & Attar            | Asteraceae | Irano-Turanian | Al         | Hemicryptophyte | YES |
| 1116 | <i>Cousinia crassipes</i> Kult.                       | Asteraceae | Irano-Turanian | Ko         | Hemicryptophyte | YES |
| 1117 | <i>Cousinia crispa</i> Jaub. & Spach                  | Asteraceae | Irano-Turanian | Al         | Hemicryptophyte | NO  |
| 1118 | <i>Cousinia curvibracteata</i> Mehregan               | Asteraceae | Irano-Turanian | Za         | Hemicryptophyte | YES |

|      |                                                          |            |                                  |                |                 |     |
|------|----------------------------------------------------------|------------|----------------------------------|----------------|-----------------|-----|
| 1119 | <i>Cousinia cylindracea</i> Boiss.                       | Asteraceae | Irano-Turanian                   | Al, Za, Az     | Hemicryptophyte | NO  |
| 1120 | <i>Cousinia cylindrocephala</i> Jaub. & Spach            | Asteraceae | Irano-Turanian                   |                | Hemicryptophyte | YES |
| 1121 | <i>Cousinia czerniakowskiae</i> Kult.                    | Asteraceae | Irano-Turanian                   | Ko             | Hemicryptophyte | YES |
| 1122 | <i>Cousinia dalahuensis</i> Attar & Ghahr.               | Asteraceae | Irano-Turanian                   | Za             | Hemicryptophyte | YES |
| 1123 | <i>Cousinia dasylepis</i> Kult.                          | Asteraceae | Irano-Turanian                   | Ko             | Hemicryptophyte | YES |
| 1124 | <i>Cousinia decipiens</i> Boiss. & Buhse                 | Asteraceae | Irano-Turanian                   | Al             | Hemicryptophyte | NO  |
| 1125 | <i>Cousinia decumbens</i> Rech.f.                        | Asteraceae | Irano-Turanian                   | Al             | Hemicryptophyte | YES |
| 1126 | <i>Cousinia denaensis</i> Attar & Djavadi                | Asteraceae | Irano-Turanian                   | Za             | Hemicryptophyte | NO  |
| 1127 | <i>Cousinia deserti</i> Bunge                            | Asteraceae | Irano-Turanian                   | Ko             | Hemicryptophyte | YES |
| 1128 | <i>Cousinia diezii</i> Rech.f.                           | Asteraceae | Irano-Turanian                   | Ko             | Hemicryptophyte | YES |
| 1129 | <i>Cousinia dipterocharpa</i> Bornm. & Rech.f.           | Asteraceae | Irano-Turanian                   | Ko             | Hemicryptophyte | YES |
| 1130 | <i>Cousinia discolor</i> Bunge                           | Asteraceae | Irano-Turanian                   | Ko             | Hemicryptophyte | YES |
| 1131 | <i>Cousinia disfulensis</i> Bornm.                       | Asteraceae | Irano-Turanian                   | Za             | Hemicryptophyte | YES |
| 1132 | <i>Cousinia eburnea</i> Bornm.                           | Asteraceae | Irano-Turanian                   | Za             | Hemicryptophyte | YES |
| 1133 | <i>Cousinia ecbatanensis</i> Bornm.                      | Asteraceae | Irano-Turanian                   | Za             | Hemicryptophyte | YES |
| 1134 | <i>Cousinia edmondsonii</i> Rech.f.                      | Asteraceae | Irano-Turanian                   | Al             | Chamaephyte     | YES |
| 1135 | <i>Cousinia ehryandra</i> Bornm. & Gauba                 | Asteraceae | Irano-Turanian                   | Ko             | Hemicryptophyte | YES |
| 1136 | <i>Cousinia elata</i> Boiss. & Buhse                     | Asteraceae | Irano-Turanian                   | Al, Ko         | Hemicryptophyte | NO  |
| 1137 | <i>Cousinia elburzensis</i> Attar, Mahdigholi & Ghahrem. | Asteraceae | Irano-Turanian                   | Al             | Hemicryptophyte | YES |
| 1138 | <i>Cousinia erinacea</i> Jaub. & Spach                   | Asteraceae | Irano-Turanian,<br>Euro-Siberian | Al             | Hemicryptophyte | YES |
| 1139 | <i>Cousinia eriobasis</i> Bunge                          | Asteraceae | Irano-Turanian                   | Za, Ke         | Chamaephyte     | NO  |
| 1140 | <i>Cousinia eriophylla</i> (Kult.) Bornm.                | Asteraceae | Irano-Turanian                   | Ko             | Chamaephyte     | YES |
| 1141 | <i>Cousinia eriorrhiza</i> Bornm.                        | Asteraceae | Irano-Turanian                   | Za             | Hemicryptophyte | YES |
| 1142 | <i>Cousinia eryngioides</i> Boiss.                       | Asteraceae | Irano-Turanian                   | Al, Ke, Ko, Az | Hemicryptophyte | NO  |
| 1143 | <i>Cousinia esfandarii</i> Rech.f. & Aellen              | Asteraceae | Irano-Turanian                   | Al             | Hemicryptophyte | NO  |
| 1144 | <i>Cousinia euchlora</i> Bornm. & Rech.f.                | Asteraceae | Irano-Turanian                   | Ko             | Hemicryptophyte | YES |
| 1145 | <i>Cousinia fabrorum</i> Rech.f.                         | Asteraceae | Irano-Turanian                   | Al, Ko         | Hemicryptophyte | NO  |
| 1146 | <i>Cousinia falcinella</i> Bornm.                        | Asteraceae | Irano-Turanian                   | Al             | Hemicryptophyte | YES |
| 1147 | <i>Cousinia farimanensis</i> Assadi                      | Asteraceae | Irano-Turanian                   | Ko             | Chamaephyte     | YES |
| 1148 | <i>Cousinia firuzkuhensis</i> Rech.f.                    | Asteraceae | Irano-Turanian                   | Al             | Hemicryptophyte | YES |

|      |                                                        |            |                                  |            |                 |     |
|------|--------------------------------------------------------|------------|----------------------------------|------------|-----------------|-----|
| 1149 | <i>Cousinia fragilis</i> C.Winkl. & Bornm.             | Asteraceae | Irano-Turanian                   | Ke         | Hemicryptophyte | YES |
| 1150 | <i>Cousinia fragillima</i> Rech.f.                     | Asteraceae | Irano-Turanian                   | Ko         | Chamaephyte     | YES |
| 1151 | <i>Cousinia freynii</i> Bornm. & Sint.                 | Asteraceae | Irano-Turanian                   | Ko         | Hemicryptophyte | YES |
| 1152 | <i>Cousinia gabrielae</i> Bornm.                       | Asteraceae | Irano-Turanian                   |            | Hemicryptophyte | YES |
| 1153 | <i>Cousinia gaharensis</i> Attar & Djavadi             | Asteraceae | Irano-Turanian                   | Za         | Hemicryptophyte | YES |
| 1154 | <i>Cousinia gatchsaranica</i> Mehregan, Assadi & Attar | Asteraceae | Irano-Turanian                   | Za         | Hemicryptophyte | YES |
| 1155 | <i>Cousinia gaubae</i> Bornm.                          | Asteraceae | Irano-Turanian                   | Al         | Hemicryptophyte | YES |
| 1156 | <i>Cousinia gedrosiaca</i> Bornm. & Gauba              | Asteraceae | Irano-Turanian                   | Ke, Lo     | Hemicryptophyte | YES |
| 1157 | <i>Cousinia ghahremanii</i> Mirtadz. & Attar           | Asteraceae | Irano-Turanian                   | Ke         | Hemicryptophyte | YES |
| 1158 | <i>Cousinia gilanica</i> Bornm.                        | Asteraceae | Irano-Turanian,<br>Euro-Siberian | Al         | Hemicryptophyte | YES |
| 1159 | <i>Cousinia gilliatii</i> Rech.f.                      | Asteraceae | Irano-Turanian                   | Az         | Hemicryptophyte | YES |
| 1160 | <i>Cousinia glaucopsis</i> Bornm. & Rech.f.            | Asteraceae | Irano-Turanian                   | Al         | Hemicryptophyte | YES |
| 1161 | <i>Cousinia gmelini</i> C.Winkl.                       | Asteraceae | Irano-Turanian                   | Al         | Hemicryptophyte | NO  |
| 1162 | <i>Cousinia golestonica</i> Attar                      | Asteraceae | Irano-Turanian                   |            | Chamaephyte     | YES |
| 1163 | <i>Cousinia gracilis</i> Boiss.                        | Asteraceae | Irano-Turanian                   | Za         | Hemicryptophyte | NO  |
| 1164 | <i>Cousinia grandis</i> C.A.Mey. ex DC.                | Asteraceae | Irano-Turanian                   | Az         | Hemicryptophyte | NO  |
| 1165 | <i>Cousinia hablitzii</i> C.A.Mey. ex DC.              | Asteraceae | Irano-Turanian                   | Al         | Hemicryptophyte | YES |
| 1166 | <i>Cousinia hamosa</i> C.A.Mey.                        | Asteraceae | Irano-Turanian                   | Az         | Hemicryptophyte | YES |
| 1167 | <i>Cousinia harazensis</i> Rech.f.                     | Asteraceae | Irano-Turanian                   | Al         | Hemicryptophyte | YES |
| 1168 | <i>Cousinia hazarensis</i> Mirtadz. & Attar            | Asteraceae | Irano-Turanian                   | Ke         | Hemicryptophyte | YES |
| 1169 | <i>Cousinia heliantha</i> Bunge                        | Asteraceae | Irano-Turanian                   | Ko         | Hemicryptophyte | NO  |
| 1170 | <i>Cousinia hergtiana</i> Bornm.                       | Asteraceae | Irano-Turanian                   | Za         | Chamaephyte     | NO  |
| 1171 | <i>Cousinia hololeuca</i> Bunge                        | Asteraceae | Irano-Turanian                   | Al         | Chamaephyte     | YES |
| 1172 | <i>Cousinia horrida</i> Kult.                          | Asteraceae | Irano-Turanian                   | Ko         | Hemicryptophyte | YES |
| 1173 | <i>Cousinia hypochionea</i> Bornm.                     | Asteraceae | Euro-Siberian                    | Al         | Hemicryptophyte | YES |
| 1174 | <i>Cousinia hypoleuca</i> Boiss.                       | Asteraceae | Irano-Turanian                   | Al, Za, Ko | Hemicryptophyte | NO  |
| 1175 | <i>Cousinia hypopolia</i> Bornm. & Sint.               | Asteraceae | Irano-Turanian                   | Al, Ko     | Hemicryptophyte | NO  |
| 1176 | <i>Cousinia ilicifolia</i> Jaub. & Spach               | Asteraceae | Irano-Turanian                   | Za         | Hemicryptophyte | YES |
| 1177 | <i>Cousinia incompta</i> DC.                           | Asteraceae | Irano-Turanian                   | ?          | Hemicryptophyte | YES |
| 1178 | <i>Cousinia inflata</i> Boiss. & Hausskn. ex Boiss.    | Asteraceae | Irano-Turanian                   | Za         | Hemicryptophyte | YES |



|      |                                                        |            |                |            |                 |     |
|------|--------------------------------------------------------|------------|----------------|------------|-----------------|-----|
| 1179 | <i>Cousinia iranica</i> Winkl. & Strauss ex Winkl.     | Asteraceae | Irano-Turanian | Za         | Hemicryptophyte | YES |
| 1180 | <i>Cousinia iranshahriana</i> Attar & Maroofi          | Asteraceae | Irano-Turanian | Za         | Chamaephyte     | NO  |
| 1181 | <i>Cousinia iranshahrii</i> Rech.f.                    | Asteraceae | Irano-Turanian | Ko         | Hemicryptophyte | YES |
| 1182 | <i>Cousinia irritans</i> Rech.f.                       | Asteraceae | Irano-Turanian | Al, Ko     | Hemicryptophyte | NO  |
| 1183 | <i>Cousinia isfahanica</i> Assadi                      | Asteraceae | Irano-Turanian | Za         | Hemicryptophyte | YES |
| 1184 | <i>Cousinia Jacobsii</i> Rech.f.                       | Asteraceae | Irano-Turanian | Za         | Hemicryptophyte | YES |
| 1185 | <i>Cousinia joharchii</i> Assadi & Mehregan            | Asteraceae | Irano-Turanian | Al         | Hemicryptophyte | YES |
| 1186 | <i>Cousinia kadereitii</i> Mehregan & Assadi           | Asteraceae | Irano-Turanian | Ko         | Chamaephyte     | YES |
| 1187 | <i>Cousinia kandavanensis</i> Attar                    | Asteraceae | Irano-Turanian | Al         | Hemicryptophyte | YES |
| 1188 | <i>Cousinia karkasensis</i> Mehregan & Djavadi         | Asteraceae | Irano-Turanian | Za         | Hemicryptophyte | YES |
| 1189 | <i>Cousinia kashanensis</i> Rech.f. & Esfand.          | Asteraceae | Irano-Turanian | Za         | Hemicryptophyte | YES |
| 1190 | <i>Cousinia keredjensis</i> Bornm. & Gauba             | Asteraceae | Irano-Turanian | Al         | Hemicryptophyte | YES |
| 1191 | <i>Cousinia kermanshahensis</i> Attar, Ghahr. & Assadi | Asteraceae | Irano-Turanian | Za         | Hemicryptophyte | YES |
| 1192 | <i>Cousinia khorasanica</i> Djavadi & Attar            | Asteraceae | Irano-Turanian | Ko         | Hemicryptophyte | YES |
| 1193 | <i>Cousinia kilouyensis</i> Djavadi & Attar            | Asteraceae | Irano-Turanian | Za         | Hemicryptophyte | YES |
| 1194 | <i>Cousinia komarowii</i> (Kuntze) C.Winkl.            | Asteraceae | Irano-Turanian | Ko         | Hemicryptophyte | YES |
| 1195 | <i>Cousinia komidjanensis</i> Mehregan                 | Asteraceae | Irano-Turanian | Za         | Hemicryptophyte | YES |
| 1196 | <i>Cousinia kornhuberi</i> Heimerl                     | Asteraceae | Irano-Turanian | Za         | Hemicryptophyte | YES |
| 1197 | <i>Cousinia korowiakowi</i> C.Winkl.                   | Asteraceae | Irano-Turanian | Za         | Hemicryptophyte | YES |
| 1198 | <i>Cousinia kotschyi</i> Boiss.                        | Asteraceae | Irano-Turanian | Za, Ko, Ke | Hemicryptophyte | NO  |
| 1199 | <i>Cousinia kurdistanica</i> Attar                     | Asteraceae | Irano-Turanian | Za         | Hemicryptophyte | YES |
| 1200 | <i>Cousinia laborum</i> Rech.f.                        | Asteraceae | Irano-Turanian |            | Hemicryptophyte | YES |
| 1201 | <i>Cousinia lactiflora</i> Rech.f.                     | Asteraceae | Irano-Turanian | Za         | Hemicryptophyte | YES |
| 1202 | <i>Cousinia lasiandra</i> Bunge                        | Asteraceae | Irano-Turanian | Ko         | Hemicryptophyte | NO  |
| 1203 | <i>Cousinia lasiolepis</i> Boiss.                      | Asteraceae | Irano-Turanian | Za, Ke     | Hemicryptophyte | YES |
| 1204 | <i>Cousinia lepida</i> Bunge ex Boiss.                 | Asteraceae | Irano-Turanian | Ko         | Chamaephyte     | NO  |
| 1205 | <i>Cousinia lignosissima</i> Rech.f.                   | Asteraceae | Irano-Turanian |            | Chamaephyte     | YES |
| 1206 | <i>Cousinia linczewskii</i> Juz.                       | Asteraceae | Irano-Turanian |            | Hemicryptophyte | YES |
| 1207 | <i>Cousinia longibracteata</i> Attar & Mirtadz.        | Asteraceae | Irano-Turanian |            | Hemicryptophyte | YES |
| 1208 | <i>Cousinia longifolia</i> C.Winkl. & Bornm.           | Asteraceae | Irano-Turanian | Za, Ke     | Hemicryptophyte | NO  |
| 1209 | <i>Cousinia lordeganensis</i> Mehregan                 | Asteraceae | Irano-Turanian | Za         | Hemicryptophyte | YES |

|      |                                                                   |            |                |            |                 |     |
|------|-------------------------------------------------------------------|------------|----------------|------------|-----------------|-----|
| 1210 | <i>Cousinia lucida</i> DC.                                        | Asteraceae | Irano-Turanian | Za, Al     | Hemicryptophyte | YES |
| 1211 | <i>Cousinia lurestanica</i> Attar & Djavadi                       | Asteraceae | Irano-Turanian | Za         | Hemicryptophyte | YES |
| 1212 | <i>Cousinia lurorum</i> Bornm.                                    | Asteraceae | Irano-Turanian | Za         | Hemicryptophyte | NO  |
| 1213 | <i>Cousinia maassoumii</i> Assadi                                 | Asteraceae | Irano-Turanian | Za         | Hemicryptophyte | YES |
| 1214 | <i>Cousinia macrocephala</i> C.A.Mey.                             | Asteraceae | Irano-Turanian | Az         | Hemicryptophyte | NO  |
| 1215 | <i>Cousinia macroptera</i> C.A.Mey. ex DC.                        | Asteraceae | Irano-Turanian | Az         | Hemicryptophyte | NO  |
| 1216 | <i>Cousinia manouchehrii</i> Rech.f. & Esfan.                     | Asteraceae | Irano-Turanian | Za         | Hemicryptophyte | YES |
| 1217 | <i>Cousinia mehreganii</i> Assadi                                 | Asteraceae | Irano-Turanian | Ko         | Chamaephyte     | YES |
| 1218 | <i>Cousinia meluarmanica</i> Rech.f.                              | Asteraceae | Irano-Turanian | Al         | Hemicryptophyte | YES |
| 1219 | <i>Cousinia meshhedensis</i> Bornm. & Rech.f.                     | Asteraceae | Irano-Turanian | Al, Ko     | Hemicryptophyte | NO  |
| 1220 | <i>Cousinia microcephala</i> C.A.Mey. ex DC.                      | Asteraceae | Irano-Turanian | Az         | Hemicryptophyte | YES |
| 1221 | <i>Cousinia mobayenii</i> Ghahr. & Attar                          | Asteraceae | Irano-Turanian | Za         | Hemicryptophyte | YES |
| 1222 | <i>Cousinia monocephala</i> Bunge                                 | Asteraceae | Irano-Turanian |            | Hemicryptophyte | YES |
| 1223 | <i>Cousinia mozdouranensis</i> Djavadi & Attar                    | Asteraceae | Irano-Turanian | Ko         | Hemicryptophyte | YES |
| 1224 | <i>Cousinia mutehensis</i> Rech.f.                                | Asteraceae | Irano-Turanian | Za         | Hemicryptophyte | YES |
| 1225 | <i>Cousinia nekarmanica</i> Rech.f.                               | Asteraceae | Irano-Turanian | Al         | Hemicryptophyte | YES |
| 1226 | <i>Cousinia neurocentra</i> Bunge                                 | Asteraceae | Irano-Turanian | Al, Ke     | Chamaephyte     | NO  |
| 1227 | <i>Cousinia noeana</i> Boiss.                                     | Asteraceae | Irano-Turanian | Za         | Hemicryptophyte | NO  |
| 1228 | <i>Cousinia nujianensis</i> Attar, Ghahr., Saber & Zarre          | Asteraceae | Irano-Turanian | Za         | Chamaephyte     | YES |
| 1229 | <i>Cousinia oligocephala</i> Hausskn. ex Boiss.                   | Asteraceae | Irano-Turanian | Za         | Hemicryptophyte | YES |
| 1230 | <i>Cousinia onopordioides</i> Ledeb.                              | Asteraceae | Irano-Turanian | Al, Ko, Ke | Hemicryptophyte | NO  |
| 1231 | <i>Cousinia oreodoxa</i> Bornm. & Sint.                           | Asteraceae | Irano-Turanian | Ko         | Hemicryptophyte | NO  |
| 1232 | <i>Cousinia orthoclada</i> Hausskn. & Bornm.                      | Asteraceae | Irano-Turanian | Za         | Hemicryptophyte | NO  |
| 1233 | <i>Cousinia oshtorankuhensis</i> Attar                            | Asteraceae | Irano-Turanian | Za         | Hemicryptophyte | YES |
| 1234 | <i>Cousinia ottonis</i> Bornm.                                    | Asteraceae | Irano-Turanian | Za         | Hemicryptophyte | YES |
| 1235 | <i>Cousinia papillosa</i> Djavadi & Attar                         | Asteraceae | Irano-Turanian | Ko         | Hemicryptophyte | YES |
| 1236 | <i>Cousinia parsana</i> Ghahr., Iranshahr & Attar                 | Asteraceae | Irano-Turanian | Za         | Hemicryptophyte | YES |
| 1237 | <i>Cousinia pasargardensis</i> Attar                              | Asteraceae | Irano-Turanian | Za         | Hemicryptophyte | YES |
| 1238 | <i>Cousinia pergamacea</i> Boiss. & Hausskn. ex Boiss. & Hausskn. | Asteraceae | Irano-Turanian | Az, Za     | Hemicryptophyte | NO  |
| 1239 | <i>Cousinia persica</i> Djavadi & Attar                           | Asteraceae | Irano-Turanian | Al         | Hemicryptophyte | YES |
| 1240 | <i>Cousinia perspolitana</i> Attar & Ghahr.                       | Asteraceae | Irano-Turanian | Za         | Hemicryptophyte | YES |

|      |                                                                   |            |                |            |                 |     |
|------|-------------------------------------------------------------------|------------|----------------|------------|-----------------|-----|
| 1241 | <i>Cousinia pinarocephala</i> Boiss.                              | Asteraceae | Irano-Turanian | Al         | Hemicryptophyte | NO  |
| 1242 | <i>Cousinia piptocephala</i> Bunge                                | Asteraceae | Irano-Turanian | Ko, Ke, Za | Hemicryptophyte | NO  |
| 1243 | <i>Cousinia platyacantha</i> Bunge                                | Asteraceae | Irano-Turanian | Ko         | Chamaephyte     | YES |
| 1244 | <i>Cousinia platyptera</i> Bornm.                                 | Asteraceae | Irano-Turanian | Za         | Hemicryptophyte | YES |
| 1245 | <i>Cousinia platyraphis</i> Kult.                                 | Asteraceae | Irano-Turanian | Ko         | Hemicryptophyte | YES |
| 1246 | <i>Cousinia pseudocandolleana</i> Assadi                          | Asteraceae | Irano-Turanian | Ko         | Hemicryptophyte | YES |
| 1247 | <i>Cousinia pterocaulos</i> (C.A.Mey.) Rech.f.                    | Asteraceae | Irano-Turanian | Az, Al, Za | Hemicryptophyte | NO  |
| 1248 | <i>Cousinia pugionifera</i> Jaub. & Spach                         | Asteraceae | Irano-Turanian | Za         | Hemicryptophyte | NO  |
| 1249 | <i>Cousinia qarehbilensis</i> Rech.f.                             | Asteraceae | Irano-Turanian |            | Hemicryptophyte | YES |
| 1250 | <i>Cousinia raphiocephala</i> Rech f.                             | Asteraceae | Irano-Turanian | Za         | Chamaephyte     | YES |
| 1251 | <i>Cousinia raphiostegia</i> Rech.f.                              | Asteraceae | Irano-Turanian |            | Chamaephyte     | YES |
| 1252 | <i>Cousinia rechingerae</i> Bornm.                                | Asteraceae | Irano-Turanian |            | Hemicryptophyte | NO  |
| 1253 | <i>Cousinia rechingerorum</i> Bornm.                              | Asteraceae | Irano-Turanian | Ko         | Chamaephyte     | YES |
| 1254 | <i>Cousinia recurvata</i> DC.                                     | Asteraceae | Irano-Turanian | Al, Za, Ko | Hemicryptophyte | NO  |
| 1255 | <i>Cousinia remingerorum</i> Bornm.                               | Asteraceae | Irano-Turanian | Ko         | Hemicryptophyte | YES |
| 1256 | <i>Cousinia renominata</i> Rech.f.                                | Asteraceae | Euro-Siberian  |            | Hemicryptophyte | YES |
| 1257 | <i>Cousinia rhabdodes</i> Bornm. & Rech.f.                        | Asteraceae | Irano-Turanian | Al         | Chamaephyte     | YES |
| 1258 | <i>Cousinia raphiocephala</i> Rech.f.                             | Asteraceae | Irano-Turanian | Za         | Chamaephyte     | YES |
| 1259 | <i>Cousinia sabalanica</i> Attar, Ghahr. & Assadi                 | Asteraceae | Irano-Turanian | Az         | Hemicryptophyte | YES |
| 1260 | <i>Cousinia sabzevarensis</i> Rech.f.                             | Asteraceae | Irano-Turanian | Ko, Za     | Hemicryptophyte | YES |
| 1261 | <i>Cousinia sagittata</i> C.Winkl. & Strauss                      | Asteraceae | Irano-Turanian | Za         | Hemicryptophyte | NO  |
| 1262 | <i>Cousinia sahandica</i> Attar & Djavadi                         | Asteraceae | Irano-Turanian | Az         | Hemicryptophyte | YES |
| 1263 | <i>Cousinia sakawensis</i> Boiss. & Hausskn. ex Boiss. & Hausskn. | Asteraceae | Irano-Turanian | Za         | Hemicryptophyte | YES |
| 1264 | <i>Cousinia saloukensis</i> Mehregan                              | Asteraceae | Irano-Turanian | Ko         | Chamaephyte     | YES |
| 1265 | <i>Cousinia sardashtensis</i> Rech.f.                             | Asteraceae | Irano-Turanian | Az         | Hemicryptophyte | YES |
| 1266 | <i>Cousinia sarzehensis</i> Attar, Ghahr. & Assadi                | Asteraceae | Irano-Turanian | Ke         | Hemicryptophyte | YES |
| 1267 | <i>Cousinia schindleriana</i> Bornm. & Gauba                      | Asteraceae | Irano-Turanian | Ko         | Hemicryptophyte | YES |
| 1268 | <i>Cousinia schiraziana</i> Attar                                 | Asteraceae | Irano-Turanian | Za         | Hemicryptophyte | YES |
| 1269 | <i>Cousinia seidlitzii</i> Bunge                                  | Asteraceae | Irano-Turanian | Az         | Hemicryptophyte | NO  |
| 1270 | <i>Cousinia shahuensis</i> Attar                                  | Asteraceae | Irano-Turanian | Za         | Chamaephyte     | YES |
| 1271 | <i>Cousinia shahvarica</i> Rech.f.                                | Asteraceae | Irano-Turanian | Al         | Hemicryptophyte | NO  |

|      |                                                       |            |                |        |                 |     |
|------|-------------------------------------------------------|------------|----------------|--------|-----------------|-----|
| 1272 | <i>Cousinia shebliensis</i> Ghahr., Iranshahr & Attar | Asteraceae | Irano-Turanian | Az     | Hemicryptophyte | YES |
| 1273 | <i>Cousinia sheidaii</i> Attar, Ghahrem. & Mahdigholi | Asteraceae | Irano-Turanian | Za     | Hemicryptophyte | YES |
| 1274 | <i>Cousinia shulabadensis</i> Attar & Ghahr.          | Asteraceae | Irano-Turanian | Za     | Hemicryptophyte | YES |
| 1275 | <i>Cousinia sicigera</i> C.Winkl. & Bornm.            | Asteraceae | Irano-Turanian | Ke     | Hemicryptophyte | NO  |
| 1276 | <i>Cousinia silvanica</i> Attar                       | Asteraceae | Irano-Turanian | Az     | Hemicryptophyte | YES |
| 1277 | <i>Cousinia silyboides</i> Jaub. & Spach              | Asteraceae | Irano-Turanian | Za     | Hemicryptophyte | NO  |
| 1278 | <i>Cousinia smirnowii</i> Trautv.                     | Asteraceae | Irano-Turanian | Al, Ko | Hemicryptophyte | NO  |
| 1279 | <i>Cousinia spathulata</i> Kult.                      | Asteraceae | Irano-Turanian | Ko     | Hemicryptophyte | YES |
| 1280 | <i>Cousinia sphaerocephala</i> Jaub. & Spach          | Asteraceae | Irano-Turanian | Al     | Hemicryptophyte | YES |
| 1281 | <i>Cousinia stahlia</i> Bornm. & Gauba                | Asteraceae | Irano-Turanian | Al, Ko | Hemicryptophyte | NO  |
| 1282 | <i>Cousinia straussii</i> Hausskn. & Winkl. ex Winkl. | Asteraceae | Irano-Turanian | Za     | Hemicryptophyte | YES |
| 1283 | <i>Cousinia subinflata</i> Bornm.                     | Asteraceae | Irano-Turanian | Za     | Hemicryptophyte | YES |
| 1284 | <i>Cousinia subpectinata</i> Mirtadz., Attar & Assadi | Asteraceae | Irano-Turanian | Ke     | Chamaephyte     | YES |
| 1285 | <i>Cousinia tabrisiana</i> Bunge                      | Asteraceae | Irano-Turanian | Az     | Chamaephyte     | NO  |
| 1286 | <i>Cousinia taybadensis</i> Djavadi & Attar           | Asteraceae | Irano-Turanian |        | Chamaephyte     | YES |
| 1287 | <i>Cousinia tenuifolia</i> C.A.Mey. ex DC.            | Asteraceae | Irano-Turanian | Az     | Hemicryptophyte | NO  |
| 1288 | <i>Cousinia tenuiramula</i> Rech.f.                   | Asteraceae | Irano-Turanian | Za     | Hemicryptophyte | YES |
| 1289 | <i>Cousinia termei</i> Rech.f.                        | Asteraceae | Irano-Turanian | Ko     | Hemicryptophyte | YES |
| 1290 | <i>Cousinia tetanocephala</i> Bornm. & Gauba          | Asteraceae | Irano-Turanian | Ko     | Hemicryptophyte | YES |
| 1291 | <i>Cousinia thamnodes</i> Boiss. & Hausskn.           | Asteraceae | Irano-Turanian | Za     | Hemicryptophyte | YES |
| 1292 | <i>Cousinia touchalensis</i> Attar                    | Asteraceae | Irano-Turanian | Al     | Hemicryptophyte | YES |
| 1293 | <i>Cousinia trachylepis</i> Bunge                     | Asteraceae | Irano-Turanian | Al     | Hemicryptophyte | NO  |
| 1294 | <i>Cousinia trachyphyllaria</i> Bornm. & Rech.f.      | Asteraceae | Irano-Turanian | Ko     | Hemicryptophyte | YES |
| 1295 | <i>Cousinia triflora</i> Schrenk                      | Asteraceae | Irano-Turanian | Ko     | Hemicryptophyte | YES |
| 1296 | <i>Cousinia turcomanica</i> C.Winkl.                  | Asteraceae | Irano-Turanian | Al, Ko | Hemicryptophyte | NO  |
| 1297 | <i>Cousinia urumiensis</i> Bornm.                     | Asteraceae | Irano-Turanian | Az     | Hemicryptophyte | NO  |
| 1298 | <i>Cousinia verbascifolia</i> Bunge                   | Asteraceae | Irano-Turanian | Ko     | Hemicryptophyte | NO  |
| 1299 | <i>Cousinia wendelboi</i> Rech.f.                     | Asteraceae | Irano-Turanian | Al     | Chamaephyte     | YES |
| 1300 | <i>Cousinia wilhelminae</i> Rech.f.                   | Asteraceae | Irano-Turanian | Az     | Hemicryptophyte | YES |
| 1301 | <i>Cousinia xiphiolepis</i> Boiss.                    | Asteraceae | Irano-Turanian | Al     | Hemicryptophyte | YES |
| 1302 | <i>Cousinia yasujensis</i> Attar                      | Asteraceae | Irano-Turanian | Za     | Hemicryptophyte | YES |

|      |                                                         |            |                |            |                 |     |
|------|---------------------------------------------------------|------------|----------------|------------|-----------------|-----|
| 1303 | <i>Cousinia zardkuhensis</i> Attar & Ghahr.             | Asteraceae | Irano-Turanian | Za         | Hemicryptophyte | YES |
| 1304 | <i>Crataegus aminii</i> Khat.                           | Rosaceae   | Irano-Turanian | Za         | Phanerophyte    | YES |
| 1305 | <i>Crataegus assadii</i> Khat.                          | Rosaceae   | Irano-Turanian | Ko         | Phanerophyte    | YES |
| 1306 | <i>Crataegus babakhanloui</i> Khat.                     | Rosaceae   | Irano-Turanian | Al, Za     | Phanerophyte    | NO  |
| 1307 | <i>Crataegus grossidentata</i> Sharifnia & K.I.Chr.     | Rosaceae   | Irano-Turanian | Al         | Phanerophyte    | YES |
| 1308 | <i>Crataegus hatamii</i> Hamzehee, K.I.Chr. & Attar     | Rosaceae   | Irano-Turanian | Za         | Phanerophyte    | YES |
| 1309 | <i>Crataegus khatamsazae</i> Hamzehee, K.I.Chr. & Attar | Rosaceae   | Irano-Turanian | Za         | Phanerophyte    | YES |
| 1310 | <i>Crataegus persica</i> Pojark.                        | Rosaceae   | Irano-Turanian | Za         | Phanerophyte    | YES |
| 1311 | <i>Crataegus zagrica</i> Khat.                          | Rosaceae   | Irano-Turanian | Za         | Phanerophyte    | YES |
| 1312 | <i>Crataegus zarrei</i> Dönmez                          | Rosaceae   | Irano-Turanian | Za         | Phanerophyte    | YES |
| 1313 | <i>Crepis alfredii</i> Bornm.                           | Asteraceae | Euro-Siberian  |            | Hemicryptophyte | YES |
| 1314 | <i>Crepis asadbarensis</i> Bornm. ex Rech.f.            | Asteraceae | Irano-Turanian | Al         | Hemicryptophyte | NO  |
| 1315 | <i>Crepis ciliata</i> K.Koch                            | Asteraceae | Irano-Turanian | Al         | Hemicryptophyte | YES |
| 1316 | <i>Crepis connexa</i> Babc.                             | Asteraceae | Irano-Turanian | Za         | Hemicryptophyte | YES |
| 1317 | <i>Crepis demavendi</i> Bornm.                          | Asteraceae | Irano-Turanian | Al         | Hemicryptophyte | YES |
| 1318 | <i>Crepis elbrusensis</i> Boiss.                        | Asteraceae | Irano-Turanian | Az, Al     | Hemicryptophyte | NO  |
| 1319 | <i>Crepis elymaitica</i> Bornm.                         | Asteraceae | Irano-Turanian | Za         | Hemicryptophyte | NO  |
| 1320 | <i>Crepis frigida</i> (Boiss. & Balansa) Babc.          | Asteraceae | Irano-Turanian | Al         | Hemicryptophyte | YES |
| 1321 | <i>Crepis gaubae</i> Bornm.                             | Asteraceae | Irano-Turanian | Al         | Hemicryptophyte | YES |
| 1322 | <i>Crepis heterotricha</i> DC.                          | Asteraceae | Irano-Turanian | Al, Za, Ke | Hemicryptophyte | NO  |
| 1323 | <i>Crepis khorassanica</i> Boiss.                       | Asteraceae | Irano-Turanian | Ko         | Hemicryptophyte | YES |
| 1324 | <i>Crepis papposissima</i> Babc.                        | Asteraceae | Irano-Turanian | Al         | Therophyte      | YES |
| 1325 | <i>Crepis quercifolia</i> Bornm. & Gauba                | Asteraceae | Irano-Turanian | Al, Az, Za | Therophyte      | NO  |
| 1326 | <i>Crepis sahendi</i> Boiss. & Buhse                    | Asteraceae | Irano-Turanian | Az         | Hemicryptophyte | YES |
| 1327 | <i>Crepis semnanensis</i> Heidarnia & Assadi            | Asteraceae | Irano-Turanian | Al         | Hemicryptophyte | YES |
| 1328 | <i>Crepis straussii</i> Bornm.                          | Asteraceae | Irano-Turanian | Za         | Hemicryptophyte | NO  |
| 1329 | <i>Crepis willemetioides</i> Boiss.                     | Asteraceae | Euro-Siberian  | Al         | Hemicryptophyte | NO  |
| 1330 | <i>Crocus almehensis</i> C.D.Brickell & B.Mathew        | Iridaceae  | Irano-Turanian |            | Geophyte        | YES |
| 1331 | <i>Crocus gilanicus</i> B.Mathew                        | Iridaceae  | Euro-Siberian  |            | Geophyte        | YES |
| 1332 | <i>Crocus gunae</i> Rukšāns                             | Iridaceae  | Euro-Siberian  | Al         | Geophyte        | YES |
| 1333 | <i>Crocus iranicus</i> Rukšāns                          | Iridaceae  | Irano-Turanian | Az         | Geophyte        | YES |

|      |                                                              |                  |                                   |            |                 |     |
|------|--------------------------------------------------------------|------------------|-----------------------------------|------------|-----------------|-----|
| 1334 | <i>Crocus reinhardii</i> Rukšāns                             | Iridaceae        | Irano-Turanian                    | Az         | Geophyte        | YES |
| 1335 | <i>Crotalaria assadii</i> Zaeifi                             | Fabaceae         | Saharo-Sindian                    |            | Hemicryptophyte | YES |
| 1336 | <i>Crucianella gilanic</i> Trin.                             | Rubiaceae        | Irano-Turanian                    | Al, Za     | Chamaephyte     | NO  |
| 1337 | <i>Crucianella platyphylla</i> Ehrend. & Schönb.-Tem.        | Rubiaceae        | Euro-Siberian                     | Al         | Chamaephyte     | YES |
| 1338 | <i>Cuscuta haussknechtii</i> Yunck.                          | Cuscutaceae      | Irano-Turanian                    |            | Therophyte      | YES |
| 1339 | <i>Cyanus ouramanicus</i> Ranjbar & Negaresh                 | Asteraceae       | Irano-Turanian                    | Za         | Hemicryptophyte | YES |
| 1340 | <i>Cyanus persicus</i> Ranjbar & Negaresh                    | Asteraceae       | Irano-Turanian                    |            | Therophyte      | YES |
| 1341 | <i>Cyanus tabrizianus</i> Ranjbar & Negaresh                 | Asteraceae       | Irano-Turanian                    | Az         | Hemicryptophyte | YES |
| 1342 | <i>Cyclotrichium depauperatum</i> (Bunge) Manden. & Scheng.  | Lamiaceae        | Irano-Turanian                    | Za         | Chamaephyte     | NO  |
| 1343 | <i>Cyclotrichium haussknechtii</i> (Bunge) Manden. & Scheng. | Lamiaceae        | Irano-Turanian                    | Za         | Chamaephyte     | YES |
| 1344 | <i>Cyclotrichium straussii</i> (Bornm.) Rech.f.              | Lamiaceae        | Irano-Turanian                    | Za         | Chamaephyte     | NO  |
| 1345 | <i>Cymbalaria bakhtiarica</i> Podlech & Iranshahr            | Scrophulariaceae | Irano-Turanian                    | Za         | Therophyte      | YES |
| 1346 | <i>Cynoglossum semnanicum</i> Khat.                          | Boraginaceae     | Irano-Turanian                    | Al         | Hemicryptophyte | YES |
| 1347 | <i>Cyperus celans</i> Kukkonen                               | Cyperaceae       | Saharo-Sindian                    |            | Hemicryptophyte | YES |
| 1348 | <i>Daucus littoralis</i> Sm.                                 | Apiaceae         | Euro-Siberian,<br>Saharo-Sindian  |            | Hemicryptophyte | NO  |
| 1349 | <i>Delphinium aquilegifolium</i> (Boiss.) Bornm.             | Ranunculaceae    | Irano-Turanian                    | Al, Ko     | Hemicryptophyte | NO  |
| 1350 | <i>Delphinium elbursense</i> Rech.f.                         | Ranunculaceae    | Irano-Turanian                    | Az, Al     | Hemicryptophyte | NO  |
| 1351 | <i>Delphinium jacobsii</i> Iranshahr                         | Ranunculaceae    | Irano-Turanian                    | Za         | Hemicryptophyte | YES |
| 1352 | <i>Delphinium lalesaricum</i> Iranshahr                      | Ranunculaceae    | Irano-Turanian                    | Ke         | Hemicryptophyte | YES |
| 1353 | <i>Delphinium lanigerum</i> Boiss.                           | Ranunculaceae    | Irano-Turanian                    | Al, Za, Az | Hemicryptophyte | NO  |
| 1354 | <i>Delphinium saniculifolium</i> Boiss.                      | Ranunculaceae    | Irano-Turanian,<br>Saharo-Sindian | Al, Za, Ke | Hemicryptophyte | NO  |
| 1355 | <i>Delphinium tuberosum</i> Aucher ex Boiss.                 | Ranunculaceae    | Irano-Turanian                    | Al, Za, Az | Hemicryptophyte | NO  |
| 1356 | <i>Delphinium ursinum</i> Rech.f.                            | Ranunculaceae    | Irano-Turanian                    | Al         | Hemicryptophyte | NO  |
| 1357 | <i>Demavendia pastinacifolia</i> (Boiss. & Hauskn.) Pimenov  | Apiaceae         | Irano-Turanian                    | Al         | Hemicryptophyte | NO  |
| 1358 | <i>Deyeuxia parsana</i> Bor                                  | Poaceae          | Irano-Turanian                    | Al         | Hemicryptophyte | YES |
| 1359 | <i>Dianthus agrostolepis</i> Rech.f.                         | Caryophyllaceae  | Euro-Siberian                     |            | Chamaephyte     | YES |
| 1360 | <i>Dianthus austroiranicus</i> Lemperg                       | Caryophyllaceae  | Irano-Turanian                    | Za         | Chamaephyte     | NO  |
| 1361 | <i>Dianthus binaludensis</i> Rech.f.                         | Caryophyllaceae  | Irano-Turanian                    | Ko         | Chamaephyte     | YES |
| 1362 | <i>Dianthus denaicus</i> Assadi                              | Caryophyllaceae  | Irano-Turanian                    | Za         | Chamaephyte     | YES |
| 1363 | <i>Dianthus diversifolius</i> Assadi                         | Caryophyllaceae  | Irano-Turanian                    | Za         | Chamaephyte     | YES |

|      |                                                             |                 |                                   |                |                 |     |
|------|-------------------------------------------------------------|-----------------|-----------------------------------|----------------|-----------------|-----|
| 1364 | <i>Dianthus elymaiticus</i> Hausskn. & Bornm.               | Caryophyllaceae | Irano-Turanian                    | Za             | Chamaephyte     | YES |
| 1365 | <i>Dianthus erythrocoleus</i> Boiss.                        | Caryophyllaceae | Irano-Turanian                    | Al             | Hemicryptophyte | NO  |
| 1366 | <i>Dianthus hafezii</i> Assadi                              | Caryophyllaceae | Irano-Turanian                    | Za             | Chamaephyte     | YES |
| 1367 | <i>Dianthus hyrcanicus</i> Rech.f.                          | Caryophyllaceae | Euro-Siberian                     | Al             | Chamaephyte     | YES |
| 1368 | <i>Dianthus macranthoides</i> Hausskn. ex Bornm.            | Caryophyllaceae | Irano-Turanian                    | Za, Ke         | Chamaephyte     | NO  |
| 1369 | <i>Dianthus mazanderanicus</i> Rech.f.                      | Caryophyllaceae | Euro-Siberian                     | Al             | Chamaephyte     | YES |
| 1370 | <i>Dianthus pseudocrinitus</i> Behrooz. & Joharchi          | Caryophyllaceae | Irano-Turanian                    | Ko             | Hemicryptophyte | YES |
| 1371 | <i>Dianthus rudbaricus</i> Assadi                           | Caryophyllaceae | Euro-Siberian                     |                | Chamaephyte     | YES |
| 1372 | <i>Dianthus sahandicus</i> Assadi                           | Caryophyllaceae | Irano-Turanian                    | Az             | Chamaephyte     | YES |
| 1373 | <i>Dianthus seidlitzii</i> Boiss.                           | Caryophyllaceae | Irano-Turanian                    | Az             | Chamaephyte     | YES |
| 1374 | <i>Dianthus stapfii</i> Lemperg                             | Caryophyllaceae | Irano-Turanian                    | Za             | Chamaephyte     | YES |
| 1375 | <i>Dianthus stenocephalus</i> Boiss.                        | Caryophyllaceae | Irano-Turanian                    | Za             | Chamaephyte     | NO  |
| 1376 | <i>Dianthus subaphyllus</i> (Lemperg) Rech.f.               | Caryophyllaceae | Irano-Turanian,<br>Saharo-Sindian | Za             | Chamaephyte     | NO  |
| 1377 | <i>Dianthus szowitzianus</i> Boiss.                         | Caryophyllaceae | Irano-Turanian                    | Al, Az, Za     | Chamaephyte     | NO  |
| 1378 | <i>Dianthus tabrisianus</i> Bien. ex Boiss.                 | Caryophyllaceae | Irano-Turanian                    | Az, Za         | Chamaephyte     | NO  |
| 1379 | <i>Diaphanoptera khorasanica</i> Rech.f.                    | Caryophyllaceae | Irano-Turanian                    | Ko             | Chamaephyte     | YES |
| 1380 | <i>Diaphanoptera stenocalycina</i> Rech.f. & Schiman-Czeika | Caryophyllaceae | Euro-Siberian                     | Al             | Chamaephyte     | YES |
| 1381 | <i>Diceratella canescens</i> (Boiss.) Boiss.                | Brassicaceae    | Saharo-Sindian                    |                | Chamaephyte     | NO  |
| 1382 | <i>Dicyclophora persica</i> Boiss.                          | Apiaceae        | Saharo-Sindian                    |                | Therophyte      | NO  |
| 1383 | <i>Didymophysa aucheri</i> Boiss.                           | Brassicaceae    | Irano-Turanian                    | Al, Az, Za, Ko | Hemicryptophyte | NO  |
| 1384 | <i>Dielsiocharis kotschy</i> (Boiss.) O.E.Schulz            | Brassicaceae    | Irano-Turanian                    | Al, Za, Ko, Ke | Hemicryptophyte | NO  |
| 1385 | <i>Dionysia archibaldii</i> Wendelbo                        | Primulaceae     | Irano-Turanian                    | Za             | Chamaephyte     | YES |
| 1386 | <i>Dionysia aretioides</i> (Lehm.) Boiss.                   | Primulaceae     | Irano-Turanian                    | Al             | Chamaephyte     | NO  |
| 1387 | <i>Dionysia assadii</i> Borjian                             | Primulaceae     | Irano-Turanian                    | Za             | Hemicryptophyte | YES |
| 1388 | <i>Dionysia aubrietoides</i> Jamzad & Mozaff.               | Primulaceae     | Irano-Turanian                    | Za             | Chamaephyte     | YES |
| 1389 | <i>Dionysia bazoftica</i> Jamzad                            | Primulaceae     | Irano-Turanian                    | Za             | Chamaephyte     | YES |
| 1390 | <i>Dionysia bryoides</i> Boiss.                             | Primulaceae     | Irano-Turanian                    | Za             | Chamaephyte     | NO  |
| 1391 | <i>Dionysia caespitosa</i> Boiss.                           | Primulaceae     | Irano-Turanian                    | Za             | Chamaephyte     | NO  |
| 1392 | <i>Dionysia cristagalli</i> Lidén                           | Primulaceae     | Irano-Turanian                    | Za             | Hemicryptophyte | YES |
| 1393 | <i>Dionysia curviflora</i> Bunge                            | Primulaceae     | Irano-Turanian                    | Za, Ke         | Chamaephyte     | YES |

|      |                                                        |             |                |            |                 |     |
|------|--------------------------------------------------------|-------------|----------------|------------|-----------------|-----|
| 1394 | <i>Dionysia diapensiifolia</i> Boiss.                  | Primulaceae | Irano-Turanian | Za         | Chamaephyte     | NO  |
| 1395 | <i>Dionysia esfandarii</i> Wendelbo                    | Primulaceae | Irano-Turanian | Za         | Chamaephyte     | YES |
| 1396 | <i>Dionysia gaubae</i> Bornm.                          | Primulaceae | Irano-Turanian | Za         | Chamaephyte     | YES |
| 1397 | <i>Dionysia hauscknechtii</i> Bornm. & Strauss         | Primulaceae | Irano-Turanian | Za         | Chamaephyte     | NO  |
| 1398 | <i>Dionysia iranica</i> Jamzad                         | Primulaceae | Irano-Turanian | Za         | Chamaephyte     | YES |
| 1399 | <i>Dionysia iranshahrii</i> Wendelbo                   | Primulaceae | Irano-Turanian | Za         | Chamaephyte     | YES |
| 1400 | <i>Dionysia janthina</i> Bornm.                        | Primulaceae | Irano-Turanian | Za         | Chamaephyte     | YES |
| 1401 | <i>Dionysia khatamii</i> Mozaff.                       | Primulaceae | Irano-Turanian | Ke         | Hemicryptophyte | YES |
| 1402 | <i>Dionysia khuzistanica</i> Jamzad                    | Primulaceae | Irano-Turanian | Za         | Chamaephyte     | YES |
| 1403 | <i>Dionysia lamingtonii</i> Stapf                      | Primulaceae | Irano-Turanian | Za         | Chamaephyte     | YES |
| 1404 | <i>Dionysia leucotricha</i> Bornm.                     | Primulaceae | Irano-Turanian | Za         | Chamaephyte     | NO  |
| 1405 | <i>Dionysia lurorum</i> Wendelbo                       | Primulaceae | Irano-Turanian | Za         | Chamaephyte     | YES |
| 1406 | <i>Dionysia michauxii</i> (Duby) Boiss.                | Primulaceae | Irano-Turanian | Za         | Chamaephyte     | YES |
| 1407 | <i>Dionysia mozaffarianii</i> Lidén                    | Primulaceae | Irano-Turanian | Za         | Chamaephyte     | YES |
| 1408 | <i>Dionysia oreodoxa</i> Bornm.                        | Primulaceae | Irano-Turanian | Ke         | Chamaephyte     | YES |
| 1409 | <i>Dionysia revoluta</i> Boiss.                        | Primulaceae | Irano-Turanian | Za, Ke     | Chamaephyte     | NO  |
| 1410 | <i>Dionysia rhaptodes</i> Bunge                        | Primulaceae | Irano-Turanian | Ke         | Chamaephyte     | NO  |
| 1411 | <i>Dionysia robusta</i> Younesi                        | Primulaceae | Irano-Turanian | Za         | Hemicryptophyte | YES |
| 1412 | <i>Dionysia sarvestanica</i> Jamzad & Grey-Wilson      | Primulaceae | Irano-Turanian | Za         | Chamaephyte     | YES |
| 1413 | <i>Dionysia sawyeri</i> (Watt) Wendelbo                | Primulaceae | Irano-Turanian | Za         | Chamaephyte     | YES |
| 1414 | <i>Dionysia tacamahaca</i> Lidén                       | Primulaceae | Irano-Turanian | Za         | Hemicryptophyte | YES |
| 1415 | <i>Dionysia termeans</i> Wendelbo                      | Primulaceae | Irano-Turanian | Za         | Chamaephyte     | YES |
| 1416 | <i>Dionysia viva</i> Lidén & Zetterl.                  | Primulaceae | Irano-Turanian | Za         | Hemicryptophyte | YES |
| 1417 | <i>Dionysia zagrica</i> Grey-Wilson                    | Primulaceae | Irano-Turanian | Za         | Chamaephyte     | YES |
| 1418 | <i>Dionysia zetterlundii</i> Lidén                     | Primulaceae | Irano-Turanian | Za         | Hemicryptophyte | YES |
| 1419 | <i>Dionysia zschummelii</i> Lidén                      | Primulaceae | Irano-Turanian | Za         | Hemicryptophyte | YES |
| 1420 | <i>Diplotaenia cachrydifolia</i> Boiss.                | Apiaceae    | Irano-Turanian | Az, Al     | Hemicryptophyte | NO  |
| 1421 | <i>Diplotaenia damavandica</i> Mozaff., Hedge & Lamond | Apiaceae    | Irano-Turanian | Al         | Hemicryptophyte | NO  |
| 1422 | <i>Dolichorrhiza persica</i> (Boiss.) B.Nord.          | Asteraceae  | Irano-Turanian | Al         | Hemicryptophyte | YES |
| 1423 | <i>Dorema ammoniacum</i> D.Don                         | Apiaceae    | Irano-Turanian | Al, Za, Ke | Hemicryptophyte | NO  |
| 1424 | <i>Dorema aucheri</i> Boiss.                           | Apiaceae    | Irano-Turanian | Za, Ke     | Hemicryptophyte | NO  |



|      |                                                    |              |                                   |                |                 |     |
|------|----------------------------------------------------|--------------|-----------------------------------|----------------|-----------------|-----|
| 1425 | <i>Doronicum bracteatum</i> Edmondson              | Asteraceae   | Irano-Turanian                    | Az, Za         | Hemicryptophyte | YES |
| 1426 | <i>Doronicum wendelboi</i> Edmondson               | Asteraceae   | Irano-Turanian,<br>Euro-Siberian  | Al             | Hemicryptophyte | YES |
| 1427 | <i>Draba pulchella</i> Willd. ex DC.               | Brassicaceae | Irano-Turanian                    | Az, Al         | Hemicryptophyte | NO  |
| 1428 | <i>Dracocephalum aucheri</i> Boiss.                | Lamiaceae    | Irano-Turanian                    | Az, Al         | Hemicryptophyte | NO  |
| 1429 | <i>Dracocephalum ghahremanii</i> Jamzad            | Lamiaceae    | Irano-Turanian                    | Al             | Chamaephyte     | YES |
| 1430 | <i>Dracocephalum kotschyi</i> Boiss.               | Lamiaceae    | Irano-Turanian                    | Al, Za         | Chamaephyte     | NO  |
| 1431 | <i>Dracocephalum oligadenium</i> Bornm. & Gauba    | Lamiaceae    | Irano-Turanian                    | Al             | Chamaephyte     | YES |
| 1432 | <i>Dracocephalum polychaetum</i> Bornm.            | Lamiaceae    | Irano-Turanian                    | Ke             | Chamaephyte     | NO  |
| 1433 | <i>Dracocephalum surmandinum</i> Rech.f.           | Lamiaceae    | Irano-Turanian                    | Za             | Chamaephyte     | NO  |
| 1434 | <i>Ducrosia assadii</i> Alava                      | Apiaceae     | Irano-Turanian                    | Za             | Hemicryptophyte | NO  |
| 1435 | <i>Echinophora cinerea</i> (Boiss.) Hedge & Lamond | Apiaceae     | Irano-Turanian                    | Za             | Hemicryptophyte | NO  |
| 1436 | <i>Echinophora platyloba</i> DC.                   | Apiaceae     | Irano-Turanian                    | Al, Za, Ko, Az | Hemicryptophyte | NO  |
| 1437 | <i>Echinops abazariae</i> Mozaff.                  | Asteraceae   | Irano-Turanian                    |                | Hemicryptophyte | YES |
| 1438 | <i>Echinops arachniolapis</i> Rech.f.              | Asteraceae   | Irano-Turanian                    | Ko             | Hemicryptophyte | YES |
| 1439 | <i>Echinops aucheri</i> Boiss.                     | Asteraceae   | Irano-Turanian                    | Ke             | Hemicryptophyte | YES |
| 1440 | <i>Echinops austro-iranicus</i> Mozaff.            | Asteraceae   | Saharo-Sindian                    |                | Hemicryptophyte | NO  |
| 1441 | <i>Echinops avajensis</i> Mozaff.                  | Asteraceae   | Irano-Turanian                    | Za             | Hemicryptophyte | NO  |
| 1442 | <i>Echinops bakhtiaricus</i> Rech.f.               | Asteraceae   | Irano-Turanian,<br>Saharo-Sindian |                | Hemicryptophyte | YES |
| 1443 | <i>Echinops barezicus</i> Montaz. & Mozaff.        | Asteraceae   | Saharo-Sindian                    |                | Hemicryptophyte | YES |
| 1444 | <i>Echinops cephalotes</i> DC.                     | Asteraceae   | Irano-Turanian                    | Al, Za         | Hemicryptophyte | NO  |
| 1445 | <i>Echinops ceratophorus</i> Boiss.                | Asteraceae   | Irano-Turanian                    | Za, Ke         | Hemicryptophyte | NO  |
| 1446 | <i>Echinops cervicornis</i> Bornm.                 | Asteraceae   | Irano-Turanian                    | Ke             | Hemicryptophyte | YES |
| 1447 | <i>Echinops chorassanicus</i> Bunge                | Asteraceae   | Irano-Turanian                    | Al, Ko         | Hemicryptophyte | NO  |
| 1448 | <i>Echinops cyanocephalus</i> Boiss. & Hauskn.     | Asteraceae   | Irano-Turanian                    | Za             | Hemicryptophyte | YES |
| 1449 | <i>Echinops delicatus</i> Mozaff.                  | Asteraceae   | Saharo-Sindian                    |                | Therophyte      | YES |
| 1450 | <i>Echinops dichrous</i> Boiss. & Hauskn.          | Asteraceae   | Saharo-Sindian                    |                | Hemicryptophyte | NO  |
| 1451 | <i>Echinops disfulensis</i> Bornm.                 | Asteraceae   | Saharo-Sindian                    |                | Hemicryptophyte | YES |
| 1452 | <i>Echinops ecbatanus</i> Bornm.                   | Asteraceae   | Irano-Turanian                    | Za, Az, Al     | Hemicryptophyte | NO  |
| 1453 | <i>Echinops elbursensis</i> Rech.f.                | Asteraceae   | Irano-Turanian                    | Al             | Hemicryptophyte | NO  |
| 1454 | <i>Echinops elymaiticus</i> Bornm.                 | Asteraceae   | Irano-Turanian                    | Za             | Hemicryptophyte | NO  |

|      |                                                    |            |                                  |        |                 |     |
|------|----------------------------------------------------|------------|----------------------------------|--------|-----------------|-----|
| 1455 | <i>Echinops endotrichus</i> Rech.f.                | Asteraceae | Irano-Turanian                   | Za     | Hemicryptophyte | NO  |
| 1456 | <i>Echinops erioceras</i> Bornm.                   | Asteraceae | Irano-Turanian                   | Za     | Hemicryptophyte | NO  |
| 1457 | <i>Echinops eriophorus</i> Steven ex DC.           | Asteraceae | Irano-Turanian                   | Za     | Hemicryptophyte | YES |
| 1458 | <i>Echinops farsicus</i> Rech.f.                   | Asteraceae | Irano-Turanian                   |        | Hemicryptophyte | NO  |
| 1459 | <i>Echinops gedrosiacus</i> Bornm.                 | Asteraceae | Saharo-Sindian                   |        | Hemicryptophyte | NO  |
| 1460 | <i>Echinops glanduloso-punctatus</i> Rech.f.       | Asteraceae | Irano-Turanian                   | Ke     | Hemicryptophyte | YES |
| 1461 | <i>Echinops haussknechtii</i> Boiss.               | Asteraceae | Irano-Turanian                   | Za, Az | Hemicryptophyte | NO  |
| 1462 | <i>Echinops hebelepis</i> DC.                      | Asteraceae | Irano-Turanian                   | Za     | Hemicryptophyte | YES |
| 1463 | <i>Echinops heteromorphus</i> Bunge                | Asteraceae | Irano-Turanian                   | Ko     | Hemicryptophyte | NO  |
| 1464 | <i>Echinops ilicifolius</i> Bunge                  | Asteraceae | Irano-Turanian                   | Ke     | Hemicryptophyte | NO  |
| 1465 | <i>Echinops iranshahrii</i> Rech.f.                | Asteraceae | Irano-Turanian                   | Za     | Hemicryptophyte | YES |
| 1466 | <i>Echinops jesdianus</i> Boiss. & Buhse           | Asteraceae | Irano-Turanian                   | Ke     | Hemicryptophyte | YES |
| 1467 | <i>Echinops kazerunensis</i> Mozaff.               | Asteraceae | Saharo-Sindian                   |        | Hemicryptophyte | YES |
| 1468 | <i>Echinops keredjensis</i> Rech.f.                | Asteraceae | Irano-Turanian                   | Al, Za | Hemicryptophyte | NO  |
| 1469 | <i>Echinops kermanshahanicus</i> Mozaff.           | Asteraceae | Irano-Turanian                   | Za     | Hemicryptophyte | NO  |
| 1470 | <i>Echinops khansaricus</i> Mozaff.                | Asteraceae | Irano-Turanian                   | Za     | Hemicryptophyte | NO  |
| 1471 | <i>Echinops khuzistanicus</i> Mozaff.              | Asteraceae | Irano-Turanian                   | Za     | Hemicryptophyte | NO  |
| 1472 | <i>Echinops koelzii</i> Rech.f.                    | Asteraceae | Irano-Turanian,<br>Euro-Siberian | Az, Za | Hemicryptophyte | NO  |
| 1473 | <i>Echinops kotschyi</i> Boiss.                    | Asteraceae | Irano-Turanian                   | Za     | Hemicryptophyte | YES |
| 1474 | <i>Echinops kurdicus</i> Boiss. & Hausskh.         | Asteraceae | Irano-Turanian                   | Za     | Hemicryptophyte | NO  |
| 1475 | <i>Echinops lalesarensis</i> Bornm.                | Asteraceae | Irano-Turanian                   | Ke     | Hemicryptophyte | NO  |
| 1476 | <i>Echinops larius</i> Mozaff.                     | Asteraceae | Saharo-Sindian                   |        | Hemicryptophyte | YES |
| 1477 | <i>Echinops lasiolepis</i> Bunge                   | Asteraceae | Irano-Turanian                   | Ke     | Hemicryptophyte | NO  |
| 1478 | <i>Echinops leiopolyceroides</i> Mozaff.           | Asteraceae | Irano-Turanian                   | Ke, Al | Hemicryptophyte | NO  |
| 1479 | <i>Echinops longipenicillatus</i> Mozaff. & Ghahr. | Asteraceae | Saharo-Sindian                   |        | Hemicryptophyte | NO  |
| 1480 | <i>Echinops macrophyllus</i> Boiss. & Hausskn.     | Asteraceae | Irano-Turanian                   | Al, Za | Hemicryptophyte | NO  |
| 1481 | <i>Echinops mosulensis</i> Rech.f.                 | Asteraceae | Irano-Turanian                   | Za, Al | Hemicryptophyte | NO  |
| 1482 | <i>Echinops nizvanus</i> Rech.f.                   | Asteraceae | Irano-Turanian                   | Al     | Hemicryptophyte | NO  |
| 1483 | <i>Echinops pabotii</i> Rech.f.                    | Asteraceae | Irano-Turanian                   | Ke     | Hemicryptophyte | YES |
| 1484 | <i>Echinops pachyphyllus</i> Rech.f.               | Asteraceae | Irano-Turanian                   | Za     | Hemicryptophyte | YES |

|      |                                                    |              |                                  |            |                 |     |
|------|----------------------------------------------------|--------------|----------------------------------|------------|-----------------|-----|
| 1485 | <i>Echinops persepolitanus</i> Rech.f.             | Asteraceae   | Irano-Turanian                   | Za         | Hemicryptophyte | NO  |
| 1486 | <i>Echinops polychromus</i> Rech.f.                | Asteraceae   | Saharo-Sindian                   |            | Hemicryptophyte | YES |
| 1487 | <i>Echinops polygamus</i> Bunge                    | Asteraceae   | Irano-Turanian                   | Al, Za     | Hemicryptophyte | NO  |
| 1488 | <i>Echinops procerus</i> Mozaff.                   | Asteraceae   | Irano-Turanian                   | Ko         | Hemicryptophyte | YES |
| 1489 | <i>Echinops psammophilus</i> Mozaff.               | Asteraceae   | Saharo-Sindian                   |            | Hemicryptophyte | NO  |
| 1490 | <i>Echinops quercetorum</i> Mozaff.                | Asteraceae   | Irano-Turanian                   | Za         | Hemicryptophyte | YES |
| 1491 | <i>Echinops robustus</i> Bunge                     | Asteraceae   | Irano-Turanian                   | Az,Za, Al  | Hemicryptophyte | NO  |
| 1492 | <i>Echinops sabzevarensis</i> Mozaff.              | Asteraceae   | Irano-Turanian                   | Al, Ko, Za | Hemicryptophyte | NO  |
| 1493 | <i>Echinops shahrudensis</i> Mozaff. & Ghahr.      | Asteraceae   | Irano-Turanian                   | Al         | Hemicryptophyte | YES |
| 1494 | <i>Echinops shulabadensis</i> Mozaff.              | Asteraceae   | Irano-Turanian                   | Al, Za     | Hemicryptophyte | YES |
| 1495 | <i>Echinops sojakii</i> Rech.f.                    | Asteraceae   | Irano-Turanian                   | Za         | Hemicryptophyte | YES |
| 1496 | <i>Echinops taftanicus</i> Mozaff. & Ghahr.        | Asteraceae   | Saharo-Sindian                   |            | Hemicryptophyte | YES |
| 1497 | <i>Echinops tenuisectus</i> Rech.f.                | Asteraceae   | Irano-Turanian                   | Ke, Za     | Hemicryptophyte | NO  |
| 1498 | <i>Echinops viscidulus</i> Mozaff.                 | Asteraceae   | Irano-Turanian                   | Za         | Hemicryptophyte | NO  |
| 1499 | <i>Echium khuzistanicum</i> Mozaff.                | Boraginaceae | Saharo-Sindian                   |            | Hemicryptophyte | YES |
| 1500 | <i>Elaeosticta nodosa</i> (Boiss.) Boiss.          | Apiaceae     | Irano-Turanian                   | Za         | Hemicryptophyte | NO  |
| 1501 | <i>Elburzia fenestrata</i> (Boiss.) Hedge          | Brassicaceae | Irano-Turanian                   | Al         | Chamaephyte     | NO  |
| 1502 | <i>Elymus zagricus</i> Assadi                      | Poaceae      | Irano-Turanian                   | Za         | Hemicryptophyte | YES |
| 1503 | <i>Eminium jaegeri</i> Bogner & P.C.Boyce          | Araceae      | Irano-Turanian                   | Za         | Geophyte        | YES |
| 1504 | <i>Ephedra laristanica</i> Assadi                  | Ephedraceae  | Saharo-Sindian                   |            | Phanerophyte    | NO  |
| 1505 | <i>Epilobium rechingeri</i> P.H.Raven              | Onagraceae   | Irano-Turanian                   | Al         | Hemicryptophyte | YES |
| 1506 | <i>Epipactis rechingeri</i> Renz                   | Orchidaceae  | Euro-Siberian                    |            | Geophyte        | NO  |
| 1507 | <i>Eremostachys lanata</i> Jamzad                  | Lamiaceae    | Euro-Siberian                    |            | Hemicryptophyte | YES |
| 1508 | <i>Ergocarpon cryptanthum</i> (Rech.f.) C.C.Towns. | Apiaceae     | Saharo-Sindian                   |            | Therophyte      | NO  |
| 1509 | <i>Erigeron hyrcanicus</i> Bornm. & Vierh.         | Asteraceae   | Irano-Turanian                   | Al         | Hemicryptophyte | NO  |
| 1510 | <i>Eriocycla ghafooriana</i> Akhani                | Apiaceae     | Euro-Siberian                    | Al         | Chamaephyte     | YES |
| 1511 | <i>Eriocycla olivieri</i> (Boiss.) H.Wolff         | Apiaceae     | Irano-Turanian,<br>Euro-Siberian | Al         | Chamaephyte     | NO  |
| 1512 | <i>Eritrichium gracillimum</i> Rech.f.             | Boraginaceae | Irano-Turanian                   | Al         | Hemicryptophyte | YES |
| 1513 | <i>Erodium dimorphum</i> Wendelbo                  | Geraniaceae  | Irano-Turanian                   | Al         | Hemicryptophyte | YES |
| 1514 | <i>Eryngium iranicum</i> Mozaff.                   | Apiaceae     | Irano-Turanian                   | Az         | Hemicryptophyte | YES |

|      |                                                            |                  |                |                |                 |     |
|------|------------------------------------------------------------|------------------|----------------|----------------|-----------------|-----|
| 1515 | <i>Erysimum caespitosum</i> DC.                            | Brassicaceae     | Irano-Turanian | Az, Al, Za     | Hemicryptophyte | NO  |
| 1516 | <i>Erysimum elbrusense</i> Boiss.                          | Brassicaceae     | Irano-Turanian | Az, Za, Al, Ko | Hemicryptophyte | NO  |
| 1517 | <i>Erysimum elymaiticum</i> Mozaff.                        | Brassicaceae     | Saharo-Sindian |                | Chamaephyte     | YES |
| 1518 | <i>Erysimum frigidum</i> Boiss. & Hausskn.                 | Brassicaceae     | Irano-Turanian | Za             | Hemicryptophyte | YES |
| 1519 | <i>Erysimum gelidum</i> Bunge                              | Brassicaceae     | Irano-Turanian | Az             | Hemicryptophyte | YES |
| 1520 | <i>Erysimum hezareense</i> Moazzeni                        | Brassicaceae     | Irano-Turanian | Ke             | Hemicryptophyte | YES |
| 1521 | <i>Erysimum koelzii</i> Polatschek & Rech.f.               | Brassicaceae     | Irano-Turanian | Za             | Hemicryptophyte | YES |
| 1522 | <i>Erysimum nanum</i> Boiss. & Hohen.                      | Brassicaceae     | Irano-Turanian | Az, Al         | Hemicryptophyte | YES |
| 1523 | <i>Erysimum nasturtioides</i> Boiss. & Hausskn.            | Brassicaceae     | Irano-Turanian | Az, Za         | Hemicryptophyte | YES |
| 1524 | <i>Erysimum polatschekii</i> Moazzeni, Assadi & Al-Shehbaz | Brassicaceae     | Irano-Turanian | Ke             | Hemicryptophyte | YES |
| 1525 | <i>Euphorbia acanthodes</i> Akhani                         | Euphorbiaceae    | Saharo-Sindian |                | Chamaephyte     | YES |
| 1526 | <i>Euphorbia aellenii</i> Rech.f.                          | Euphorbiaceae    | Irano-Turanian | Ko             | Hemicryptophyte | YES |
| 1527 | <i>Euphorbia connata</i> Boiss.                            | Euphorbiaceae    | Irano-Turanian | Ke             | Hemicryptophyte | NO  |
| 1528 | <i>Euphorbia decipiens</i> Boiss. & Buhse                  | Euphorbiaceae    | Irano-Turanian | Az, Za, Ke     | Hemicryptophyte | NO  |
| 1529 | <i>Euphorbia elwendica</i> Stapf                           | Euphorbiaceae    | Irano-Turanian | Za             | Hemicryptophyte | YES |
| 1530 | <i>Euphorbia erythradenia</i> Boiss.                       | Euphorbiaceae    | Irano-Turanian | Za, Ke         | Hemicryptophyte | NO  |
| 1531 | <i>Euphorbia ferdowsiana</i> Pahlevani                     | Euphorbiaceae    | Irano-Turanian | Ko             | Hemicryptophyte | YES |
| 1532 | <i>Euphorbia gorenflotii</i> Mobayen                       | Euphorbiaceae    | Irano-Turanian | Al             | Hemicryptophyte | YES |
| 1533 | <i>Euphorbia gypsicola</i> Rech.f. & Aellen                | Euphorbiaceae    | Irano-Turanian | Al             | Hemicryptophyte | YES |
| 1534 | <i>Euphorbia halophila</i> Bronm. & Gauba                  | Euphorbiaceae    | Irano-Turanian |                | Hemicryptophyte | YES |
| 1535 | <i>Euphorbia hebecarpa</i> Boiss.                          | Euphorbiaceae    | Irano-Turanian | Az, Za, Ke     | Hemicryptophyte | NO  |
| 1536 | <i>Euphorbia iranshahrii</i> Pahlevani                     | Euphorbiaceae    | Irano-Turanian | Za             | Hemicryptophyte | NO  |
| 1537 | <i>Euphorbia khorasanica</i> Saeidi & Ghayorm.             | Euphorbiaceae    | Irano-Turanian | Ko             | Hemicryptophyte | YES |
| 1538 | <i>Euphorbia malleata</i> Boiss.                           | Euphorbiaceae    | Irano-Turanian | Za             | Hemicryptophyte | YES |
| 1539 | <i>Euphorbia mazandaranica</i> Pahlevani                   | Euphorbiaceae    | Euro-Siberian  |                | Hemicryptophyte | NO  |
| 1540 | <i>Euphorbia plebeia</i> Boiss.                            | Euphorbiaceae    | Irano-Turanian | Za             | Hemicryptophyte | YES |
| 1541 | <i>Euphorbia sahendi</i> Bormm.                            | Euphorbiaceae    | Irano-Turanian | Az             | Hemicryptophyte | YES |
| 1542 | <i>Euphorbia spartiformis</i> Mobayen                      | Euphorbiaceae    | Saharo-Sindian |                | Hemicryptophyte | YES |
| 1543 | <i>Euphorbia sulphurea</i> Pahlevani                       | Euphorbiaceae    | Saharo-Sindian |                | Hemicryptophyte | YES |
| 1544 | <i>Euphorbia teheranica</i> Boiss.                         | Euphorbiaceae    | Irano-Turanian | Al, Za         | Hemicryptophyte | NO  |
| 1545 | <i>Euphrasia juzepczukii</i> Deniss.                       | Scrophulariaceae | Irano-Turanian | Az, Al         | Therophyte      | NO  |

|      |                                                          |                  |                                   |                |                 |     |
|------|----------------------------------------------------------|------------------|-----------------------------------|----------------|-----------------|-----|
| 1546 | <i>Farsetia assadii</i> Kavousi                          | Scrophulariaceae | Saharo-Sindian                    |                | Chamaephyte     | YES |
| 1547 | <i>Ferula alliacea</i> Boiss.                            | Apiaceae         | Irano-Turanian                    | Ko             | Hemicryptophyte | YES |
| 1548 | <i>Ferula behboudiana</i> (Rech.f. & Esfand.) D.F.Chamb. | Apiaceae         | Saharo-Sindian                    |                | Hemicryptophyte | NO  |
| 1549 | <i>Ferula flabelliloba</i> Rech.f. & Aellen              | Apiaceae         | Irano-Turanian                    | Ko, Za         | Hemicryptophyte | YES |
| 1550 | <i>Ferula gabrielii</i> Rech.f.                          | Apiaceae         | Irano-Turanian                    | Ko, Lo         | Hemicryptophyte | YES |
| 1551 | <i>Ferula hezarlalehzarica</i> Ajani                     | Apiaceae         | Irano-Turanian                    | Ke             | Hemicryptophyte | YES |
| 1552 | <i>Ferula hirtella</i> Boiss.                            | Apiaceae         | Irano-Turanian                    | Al, Za, Ke, Lo | Hemicryptophyte | NO  |
| 1553 | <i>Ferula kashanica</i> Rech.f.                          | Apiaceae         | Irano-Turanian                    | Za             | Hemicryptophyte | NO  |
| 1554 | <i>Ferula lutensis</i> Rech.f.                           | Apiaceae         | Irano-Turanian,<br>Saharo-Sindian | Ko, Lo         | Hemicryptophyte | NO  |
| 1555 | <i>Ferula macrocolea</i> Boiss.                          | Apiaceae         | Irano-Turanian                    | Za, Al         | Hemicryptophyte | NO  |
| 1556 | <i>Ferula microcolea</i> (Boiss.) Boiss.                 | Apiaceae         | Irano-Turanian                    | Az, Za, Al     | Hemicryptophyte | NO  |
| 1557 | <i>Ferula persica</i> Willd.                             | Apiaceae         | Irano-Turanian                    | Al             | Hemicryptophyte | NO  |
| 1558 | <i>Ferula pseudalliacea</i> Rech.f.                      | Apiaceae         | Irano-Turanian                    | Za             | Hemicryptophyte | NO  |
| 1559 | <i>Ferula serpentinica</i> Rech.f.                       | Apiaceae         | Irano-Turanian                    | Al             | Hemicryptophyte | YES |
| 1560 | <i>Ferula sharifii</i> Rech.f. & Esfand.                 | Apiaceae         | Irano-Turanian,<br>Saharo-Sindian | Ke, Lo         | Hemicryptophyte | YES |
| 1561 | <i>Ferula stenocarpa</i> Boiss. & Hausskn.               | Apiaceae         | Saharo-Sindian                    |                | Hemicryptophyte | NO  |
| 1562 | <i>Ferula tabasensis</i> Rech.f.                         | Apiaceae         | Irano-Turanian                    | Ko, Lo         | Hemicryptophyte | NO  |
| 1563 | <i>Ferula xylorhachis</i> Rech.f.                        | Apiaceae         | Irano-Turanian                    | Al, Za, Ko     | Hemicryptophyte | NO  |
| 1564 | <i>Ferulago angulata</i> (Schltdl.) Boiss.               | Apiaceae         | Irano-Turanian                    | Az, Za, Al, Ko | Hemicryptophyte | NO  |
| 1565 | <i>Ferulago carduchorum</i> Boiss. & Hausskn. ex Boiss.  | Apiaceae         | Irano-Turanian                    | Az, Za, Ke     | Hemicryptophyte | NO  |
| 1566 | <i>Ferulago contracta</i> Boiss. & Hausskn.              | Apiaceae         | Irano-Turanian                    | Za, Ke         | Hemicryptophyte | NO  |
| 1567 | <i>Ferulago phialocarpa</i> Rech.f. & Riedl              | Apiaceae         | Irano-Turanian                    | Za             | Hemicryptophyte | YES |
| 1568 | <i>Ferulago trifida</i> Boiss.                           | Apiaceae         | Irano-Turanian                    | Al             | Hemicryptophyte | YES |
| 1569 | <i>Festuca akhanii</i> Tzvelev                           | Poaceae          | Irano-Turanian                    |                | Hemicryptophyte | YES |
| 1570 | <i>Festuca iranica</i> E.B.Alexeev                       | Poaceae          | Irano-Turanian                    | Za             | Hemicryptophyte | YES |
| 1571 | <i>Festuca rechingeri</i> E.B.Alexeev                    | Poaceae          | Euro-Siberian                     |                | Hemicryptophyte | YES |
| 1572 | <i>Festuca sabalanica</i> E.B.Alexeev                    | Poaceae          | Irano-Turanian                    | Az             | Hemicryptophyte | YES |
| 1573 | <i>Fibigia multicaulis</i> (Boiss. & Hohen.) Boiss.      | Brassicaceae     | Irano-Turanian                    | Al, Za, Ke     | Hemicryptophyte | NO  |
| 1574 | <i>Fibigia umbellata</i> (Boiss.) Boiss.                 | Brassicaceae     | Irano-Turanian                    | Al, Za, Ke     | Hemicryptophyte | NO  |
| 1575 | <i>Fortuynia garcinii</i> (Burm.f.) Shuttlew.            | Brassicaceae     | Irano-Turanian,                   |                | Chamaephyte     | NO  |

|      |                                                              |                | Saharo-Sindian                    |            |                 |     |
|------|--------------------------------------------------------------|----------------|-----------------------------------|------------|-----------------|-----|
| 1576 | <i>Fritillaria avromanica</i> Advay & Tekşen                 | Liliaceae      | Irano-Turanian                    | Za         | Geophyte        | YES |
| 1577 | <i>Fritillaria chlorantha</i> Hausskn. & Bomm.               | Liliaceae      | Irano-Turanian                    | Za         | Geophyte        | NO  |
| 1578 | <i>Fritillaria kotschyana</i> Herb.                          | Liliaceae      | Irano-Turanian                    | Az, Al     | Geophyte        | NO  |
| 1579 | <i>Fritillaria olivieri</i> Baker                            | Liliaceae      | Irano-Turanian                    | Az, Za     | Geophyte        | NO  |
| 1580 | <i>Fritillaria straussii</i> Bornm.                          | Liliaceae      | Irano-Turanian                    | Za         | Geophyte        | NO  |
| 1581 | <i>Fritillaria zagrica</i> Stapf                             | Liliaceae      | Irano-Turanian                    | Az, Za     | Geophyte        | NO  |
| 1582 | <i>Gagea calcicola</i> Zarrei & Wilkin                       | Liliaceae      | Irano-Turanian                    | Za         | Geophyte        | NO  |
| 1583 | <i>Gagea iranica</i> Zarrei & Zarre                          | Liliaceae      | Irano-Turanian                    | Al, Ko     | Geophyte        | NO  |
| 1584 | <i>Gagea robusta</i> Zarrei & Wilkin                         | Liliaceae      | Irano-Turanian                    | Al         | Geophyte        | YES |
| 1585 | <i>Gagea uliginosa</i> Siehe & Pascher                       | Liliaceae      | Irano-Turanian                    | Al, Az     | Geophyte        | NO  |
| 1586 | <i>Gagea wendelboi</i> Rech.f.                               | Liliaceae      | Irano-Turanian                    | Al         | Geophyte        | YES |
| 1587 | <i>Gaillonia dezfulensis</i> Naanaie & Assadi                | Rubiaceae      | Saharo-Sindian                    |            | Chamaephyte     | YES |
| 1588 | <i>Gaillonia eriantha</i> Jaub. & Spach                      | Rubiaceae      | Irano-Turanian                    | Ke, Za     | Chamaephyte     | NO  |
| 1589 | <i>Galium aucheri</i> Boiss.                                 | Rubiaceae      | Irano-Turanian                    | Al         | Hemicryptophyte | NO  |
| 1590 | <i>Galium decumbens</i> (Ehrend.) Ehrend. & Schönb.-Tem.     | Rubiaceae      | Irano-Turanian                    | Az, Al     | Chamaephyte     | NO  |
| 1591 | <i>Galium delicatulum</i> Boiss. & Hohen.                    | Rubiaceae      | Irano-Turanian                    | Al         | Chamaephyte     | YES |
| 1592 | <i>Galium diploprion</i> Boiss. & Hohen.                     | Rubiaceae      | Irano-Turanian                    | Al         | Hemicryptophyte | NO  |
| 1593 | <i>Galium elbursense</i> Bornm. & Gauba                      | Rubiaceae      | Irano-Turanian                    | Al         | Chamaephyte     | YES |
| 1594 | <i>Galium iranicum</i> Hausskn. ex Bornm.                    | Rubiaceae      | Irano-Turanian                    | Za         | Hemicryptophyte | YES |
| 1595 | <i>Galium problematicum</i> (Ehrend.) Ehrend. & Schönb.-Tem. | Rubiaceae      | Irano-Turanian                    | Al         | Chamaephyte     | YES |
| 1596 | <i>Galium pseudokurdicum</i> (Ehrend.) Schönb.-Tem.          | Rubiaceae      | Irano-Turanian                    | Za, Az     | Hemicryptophyte | NO  |
| 1597 | <i>Galium schoenbeck-Temesyae</i> Ehrend.                    | Rubiaceae      | Irano-Turanian                    | Za         | Chamaephyte     | YES |
| 1598 | <i>Galium sojakii</i> Ehrend. & Schönb.-Tem.                 | Rubiaceae      | Irano-Turanian                    | Za         | Therophyte      | YES |
| 1599 | <i>Galium tehranicum</i> Moussavi, Ghahr. & Attar            | Rubiaceae      | Irano-Turanian                    | Al         | Hemicryptophyte | YES |
| 1600 | <i>Geranium persicum</i> Schönb.-Tem.                        | Geraniaceae    | Irano-Turanian                    | Az, Za, Al | Geophyte        | NO  |
| 1601 | <i>Geum iranicum</i> Khat.                                   | Rosaceae       | Irano-Turanian                    | Ko         | Hemicryptophyte | YES |
| 1602 | <i>Girgensohnia imbricata</i> Bunge                          | Chenopodiaceae | Irano-Turanian                    | Ke, Lo     | Therophyte      | NO  |
| 1603 | <i>Gladiolus persicus</i> Boiss.                             | Iridaceae      | Irano-Turanian,<br>Saharo-Sindian | Za, Ke     | Geophyte        | NO  |
| 1604 | <i>Glaucium calycinum</i> Boiss.                             | Papaveraceae   | Irano-Turanian                    | Za         | Hemicryptophyte | YES |

|      |                                                             |                 |                                   |            |                 |     |
|------|-------------------------------------------------------------|-----------------|-----------------------------------|------------|-----------------|-----|
| 1605 | <i>Glaucium contortuplicatum</i> Boiss.                     | Papaveraceae    | Irano-Turanian                    | Al         | Hemicryptophyte | NO  |
| 1606 | <i>Glaucium elegantissimum</i> Mobayen                      | Papaveraceae    | Irano-Turanian,<br>Euro-Siberian  |            | Therophyte      | YES |
| 1607 | <i>Glaucium goletanicum</i> A.Gran & Sharifnia              | Papaveraceae    | Irano-Turanian                    |            | Hemicryptophyte | YES |
| 1608 | <i>Glaucium mathiolifolium</i> Mobayen                      | Papaveraceae    | Saharo-Sindian                    |            | Hemicryptophyte | YES |
| 1609 | <i>Graellsia integrifolia</i> (Rech.f.) Rech.f.             | Brassicaceae    | Irano-Turanian                    | Ko         | Hemicryptophyte | YES |
| 1610 | <i>Graellsia saxifragifolia</i> (DC.) Boiss.                | Brassicaceae    | Irano-Turanian                    | Za, Ko, Ke | Hemicryptophyte | NO  |
| 1611 | <i>Graellsia stylosa</i> (Boiss. & Hohen.) Poulter          | Brassicaceae    | Irano-Turanian                    | Al         | Hemicryptophyte | NO  |
| 1612 | <i>Grantia arachnoidea</i> Boiss.                           | Asteraceae      | Saharo-Sindian                    |            | Hemicryptophyte | YES |
| 1613 | <i>Grantia discoidea</i> Bunge ex Boiss.                    | Asteraceae      | Irano-Turanian                    |            | Hemicryptophyte | YES |
| 1614 | <i>Gypsophila acantholimoides</i> Bornm.                    | Caryophyllaceae | Irano-Turanian                    | Za         | Chamaephyte     | YES |
| 1615 | <i>Gypsophila adenophora</i> Boiss. & Buhse                 | Caryophyllaceae | Irano-Turanian                    | Za         | Hemicryptophyte | YES |
| 1616 | <i>Gypsophila alvandica</i> Falat., F.Ghahrem. & Assadi     | Caryophyllaceae | Irano-Turanian                    | Za         | Hemicryptophyte | YES |
| 1617 | <i>Gypsophila bazorganica</i> Rech.f.                       | Caryophyllaceae | Irano-Turanian                    | Az         | Chamaephyte     | YES |
| 1618 | <i>Gypsophila caricifolia</i> Boiss.                        | Caryophyllaceae | Irano-Turanian                    | Az, Za     | Hemicryptophyte | NO  |
| 1619 | <i>Gypsophila elymaitica</i> Mozaff.                        | Caryophyllaceae | Irano-Turanian,<br>Saharo-Sindian |            | Hemicryptophyte | YES |
| 1620 | <i>Gypsophila iranica</i> Barkoudah                         | Caryophyllaceae | Irano-Turanian                    | Az         | Therophyte      | YES |
| 1621 | <i>Gypsophila leioclada</i> Rech.f.                         | Caryophyllaceae | Irano-Turanian                    | Za         | Hemicryptophyte | YES |
| 1622 | <i>Gypsophila lurorum</i> Rech.f.                           | Caryophyllaceae | Irano-Turanian                    | Za         | Hemicryptophyte | YES |
| 1623 | <i>Gypsophila melampoda</i> Bien. ex Boiss.                 | Caryophyllaceae | Irano-Turanian,<br>Saharo-Sindian | Za         | Therophyte      | YES |
| 1624 | <i>Gypsophila mucronifolia</i> Rech.f.                      | Caryophyllaceae | Irano-Turanian                    | Al         | Hemicryptophyte | YES |
| 1625 | <i>Gypsophila persica</i> Barkoudak                         | Caryophyllaceae | Irano-Turanian                    | Al, Za     | Hemicryptophyte | NO  |
| 1626 | <i>Gypsophila platyphylla</i> Boiss.                        | Caryophyllaceae | Irano-Turanian                    | Za         | Hemicryptophyte | NO  |
| 1627 | <i>Gypsophila polyclada</i> Fenzl ex Boiss.                 | Caryophyllaceae | Irano-Turanian                    | Za         | Hemicryptophyte | YES |
| 1628 | <i>Gypsophila pseudomelampoda</i> Gauba & Rech.f.           | Caryophyllaceae | Irano-Turanian                    | Al, Za     | Hemicryptophyte | NO  |
| 1629 | <i>Gypsophila pseudopallida</i> Falat., Assadi & F.Ghahrem. | Caryophyllaceae | Irano-Turanian                    | Az         | Hemicryptophyte | YES |
| 1630 | <i>Gypsophila rupestris</i> Mozaff.                         | Caryophyllaceae | Irano-Turanian                    | Za         | Hemicryptophyte | YES |
| 1631 | <i>Gypsophila saponarioides</i> Bornm. & Gauba              | Caryophyllaceae | Irano-Turanian                    | Al         | Chamaephyte     | YES |
| 1632 | <i>Gypsophila wilhelminae</i> Rech.f.                       | Caryophyllaceae | Irano-Turanian                    | Az         | Chamaephyte     | YES |
| 1633 | <i>Gypsophila xanthochlora</i> Rech.f.                      | Caryophyllaceae | Irano-Turanian                    | Al         | Hemicryptophyte | NO  |

|      |                                                        |                 |                                   |            |                 |     |
|------|--------------------------------------------------------|-----------------|-----------------------------------|------------|-----------------|-----|
| 1634 | <i>Gypsophila yazdiana</i> Falat., F.Ghahrem. & Assadi | Caryophyllaceae | Irano-Turanian                    | Ke         | Hemicryptophyte | YES |
| 1635 | <i>Halanthium alae flavum</i> Assadi                   | Chenopodiaceae  | Irano-Turanian                    | Az         | Therophyte      | YES |
| 1636 | <i>Halimocnemis azarbaijanensis</i> Assadi             | Chenopodiaceae  | Irano-Turanian                    | Az         | Therophyte      | YES |
| 1637 | <i>Halimocnemis mamamensis</i> (Bunge) Assadi          | Chenopodiaceae  | Irano-Turanian                    | Az, Al, Za | Therophyte      | NO  |
| 1638 | <i>Halotis pedunculata</i> Assadi                      | Amaranthaceae   | Saharo-Sindian                    |            | Therophyte      | YES |
| 1639 | <i>Haplophyllum bakhteganicum</i> Soltani & Khosravi   | Rutaceae        | Irano-Turanian                    | Za         | Hemicryptophyte | YES |
| 1640 | <i>Haplophyllum buhsei</i> Boiss.                      | Rutaceae        | Irano-Turanian                    | Al         | Chamaephyte     | YES |
| 1641 | <i>Haplophyllum canaliculatum</i> Boiss.               | Rutaceae        | Irano-Turanian,<br>Saharo-Sindian | Za, Lo     | Hemicryptophyte | NO  |
| 1642 | <i>Haplophyllum dasygynum</i> C.C.Towns.               | Rutaceae        | Irano-Turanian                    | Az, Za     | Hemicryptophyte | YES |
| 1643 | <i>Haplophyllum furfuraceum</i> Bunge                  | Rutaceae        | Irano-Turanian                    | Ko, Lo     | Hemicryptophyte | NO  |
| 1644 | <i>Haplophyllum glaberrimum</i> Bunge                  | Rutaceae        | Irano-Turanian                    |            | Hemicryptophyte | NO  |
| 1645 | <i>Haplophyllum laeviusculum</i> C.C.Towns.            | Rutaceae        | Irano-Turanian                    | Az, Al     | Chamaephyte     | NO  |
| 1646 | <i>Haplophyllum laristanicum</i> C.C.Towns.            | Rutaceae        | Saharo-Sindian                    |            | Hemicryptophyte | YES |
| 1647 | <i>Haplophyllum lissonotum</i> C.C.Towns.              | Rutaceae        | Irano-Turanian                    | Za         | Chamaephyte     | NO  |
| 1648 | <i>Haplophyllum rechingeri</i> C.C.Towns.              | Rutaceae        | Irano-Turanian                    | Za         | Hemicryptophyte | YES |
| 1649 | <i>Haplophyllum rubro-tinctum</i> C.C.Towns.           | Rutaceae        | Irano-Turanian                    | Al, Za     | Hemicryptophyte | NO  |
| 1650 | <i>Haplophyllum stapfianum</i> Hand.-Mazz.             | Rutaceae        | Irano-Turanian                    | Za         | Hemicryptophyte | YES |
| 1651 | <i>Haplophyllum virgatum</i> Spach                     | Rutaceae        | Irano-Turanian,<br>Saharo-Sindian |            | Hemicryptophyte | NO  |
| 1652 | <i>Haplophyllum viridulum</i> Soják                    | Rutaceae        | Irano-Turanian                    | Za         | Hemicryptophyte | NO  |
| 1653 | <i>Hausknechtia elymaitica</i> Boiss.                  | Apiaceae        | Irano-Turanian                    | Za         | Hemicryptophyte | NO  |
| 1654 | <i>Hedysarum al-shehbazii</i> Ranjbar                  | Fabaceae        | Irano-Turanian                    | Za         | Hemicryptophyte | YES |
| 1655 | <i>Hedysarum bojnordense</i> Ranjbar & Joharchi        | Fabaceae        | Irano-Turanian                    |            | Hemicryptophyte | YES |
| 1656 | <i>Hedysarum callithrix</i> Boiss.                     | Fabaceae        | Irano-Turanian                    | Al, Ko, Ke | Hemicryptophyte | YES |
| 1657 | <i>Hedysarum criniferum</i> Boiss.                     | Fabaceae        | Irano-Turanian                    | Za, Az     | Hemicryptophyte | NO  |
| 1658 | <i>Hedysarum damghanicum</i> Rech.f.                   | Fabaceae        | Irano-Turanian                    | Al         | Chamaephyte     | YES |
| 1659 | <i>Hedysarum elbursense</i> Bornm. & Gauba             | Fabaceae        | Irano-Turanian                    | Al         | Chamaephyte     | YES |
| 1660 | <i>Hedysarum glabrifoliolatum</i> Ranjbar              | Fabaceae        | Irano-Turanian                    | Ko         | Chamaephyte     | YES |
| 1661 | <i>Hedysarum gypsophilum</i> Dehshiri                  | Fabaceae        | Irano-Turanian                    | Za         | Hemicryptophyte | YES |
| 1662 | <i>Hedysarum halophilum</i> Bornm. & Gauba             | Fabaceae        | Irano-Turanian                    | Al         | Chamaephyte     | YES |
| 1663 | <i>Hedysarum hyrcanum</i> Bornm. & Gauba               | Fabaceae        | Irano-Turanian                    | Al         | Hemicryptophyte | YES |



|      |                                                              |              |                                   |            |                 |     |
|------|--------------------------------------------------------------|--------------|-----------------------------------|------------|-----------------|-----|
| 1664 | <i>Hedysarum johartchii</i> Ranjbar                          | Fabaceae     | Irano-Turanian                    | Ko         | Hemicryptophyte | YES |
| 1665 | <i>Hedysarum longipedunculatum</i> Ranjbar & Karamian        | Fabaceae     | Irano-Turanian                    |            | Hemicryptophyte | YES |
| 1666 | <i>Hedysarum marandense</i> Mozaff.                          | Fabaceae     | Irano-Turanian                    | Az         | Chamaephyte     | YES |
| 1667 | <i>Hedysarum neyshaboricum</i> Ranjbar                       | Fabaceae     | Irano-Turanian                    | Ko         | Hemicryptophyte | YES |
| 1668 | <i>Hedysarum orumiehense</i> Ranjbar                         | Fabaceae     | Irano-Turanian                    | Az         | Hemicryptophyte | YES |
| 1669 | <i>Hedysarum papillosum</i> Boiss.                           | Fabaceae     | Irano-Turanian                    | Az         | Hemicryptophyte | YES |
| 1670 | <i>Hedysarum paucifoliolatum</i> Ranjbar & Olanj             | Fabaceae     | Irano-Turanian                    | Ko         | Hemicryptophyte | YES |
| 1671 | <i>Hedysarum persicum</i> Bidarlord, F.Ghahrem. & Mozaff.    | Fabaceae     | Irano-Turanian                    | Az         | Hemicryptophyte | YES |
| 1672 | <i>Hedysarum plumosum</i> Boiss. & Hausskn.                  | Fabaceae     | Irano-Turanian                    | Za         | Hemicryptophyte | YES |
| 1673 | <i>Hedysarum renzii</i> Rech.f.                              | Fabaceae     | Irano-Turanian                    |            | Chamaephyte     | YES |
| 1674 | <i>Heldreichia longifolia</i> Boiss.                         | Brassicaceae | Irano-Turanian                    | Za         | Hemicryptophyte | YES |
| 1675 | <i>Helianthemum assadii</i> Ghahrem.-Nejad & Gholamian       | Cistaceae    | Saharo-Sindian                    |            | Therophyte      | NO  |
| 1676 | <i>Helianthemum sinuspersicum</i> Gholamian & Ghahrem.-Nejad | Cistaceae    | Saharo-Sindian                    |            | Chamaephyte     | YES |
| 1677 | <i>Helichrysum artemisioides</i> Boiss. & Hausskn.           | Asteraceae   | Irano-Turanian                    | Za         | Chamaephyte     | NO  |
| 1678 | <i>Helichrysum athanaton</i> Georgiadou & Rech.f.            | Asteraceae   | Irano-Turanian                    | Za         | Chamaephyte     | NO  |
| 1679 | <i>Helichrysum davisianum</i> Rech.f.                        | Asteraceae   | Irano-Turanian                    | Ke         | Chamaephyte     | YES |
| 1680 | <i>Helichrysum globiferum</i> Boiss.                         | Asteraceae   | Irano-Turanian                    | Az, Al, Za | Chamaephyte     | NO  |
| 1681 | <i>Helichrysum leucocephalum</i> Boiss.                      | Asteraceae   | Irano-Turanian,<br>Saharo-Sindian | Ke, Lo     | Chamaephyte     | NO  |
| 1682 | <i>Helichrysum makranicum</i> (Rech.f. & Esfand.) Rech.f.    | Asteraceae   | Saharo-Sindian                    |            | Hemicryptophyte | YES |
| 1683 | <i>Helichrysum oligocephalum</i> DC.                         | Asteraceae   | Irano-Turanian                    | Za, Al     | Chamaephyte     | NO  |
| 1684 | <i>Helichrysum oocephalum</i> Boiss.                         | Asteraceae   | Irano-Turanian                    | Al, Za, Ko | Hemicryptophyte | NO  |
| 1685 | <i>Helichrysum persicum</i> Ghahrem.-Nejad & Noori           | Asteraceae   | Irano-Turanian                    | Ko         | Chamaephyte     | YES |
| 1686 | <i>Helichrysum psychophilum</i> Boiss.                       | Asteraceae   | Irano-Turanian                    | Az, Al     | Hemicryptophyte | NO  |
| 1687 | <i>Heliocarya monandra</i> Bunge                             | Boraginaceae | Irano-Turanian                    | Za, Ke     | Hemicryptophyte | YES |
| 1688 | <i>Heliotropium agdense</i> Bunge                            | Boraginaceae | Irano-Turanian                    | Ke         | Therophyte      | NO  |
| 1689 | <i>Heliotropium aucheri</i> DC.                              | Boraginaceae | Irano-Turanian                    | Ke, Za     | Hemicryptophyte | NO  |
| 1690 | <i>Heliotropium denticulatum</i> Boiss. & Hausskn.           | Boraginaceae | Irano-Turanian                    | Za         | Hemicryptophyte | YES |
| 1691 | <i>Heliotropium disciforme</i> Akhani                        | Boraginaceae | Irano-Turanian                    | Ko         | Therophyte      | YES |
| 1692 | <i>Heliotropium esfahanicum</i> Khat.                        | Boraginaceae | Irano-Turanian                    | Za         | Therophyte      | YES |
| 1693 | <i>Heliotropium esfandiarii</i> Akhani & Riedl               | Boraginaceae | Irano-Turanian                    | Al         | Therophyte      | NO  |

|      |                                                           |               |                |            |                 |     |
|------|-----------------------------------------------------------|---------------|----------------|------------|-----------------|-----|
| 1694 | <i>Heliotropium gypsaceum</i> Rech.f. & Riedl             | Boraginaceae  | Irano-Turanian | Az         | Therophyte      | YES |
| 1695 | <i>Heliotropium kaserunense</i> Bornm.                    | Boraginaceae  | Saharo-Sindian |            | Hemicryptophyte | YES |
| 1696 | <i>Heliotropium khayyamii</i> Akhani                      | Boraginaceae  | Irano-Turanian | Ko         | Therophyte      | YES |
| 1697 | <i>Heliotropium samoliflorum</i> Bunge                    | Boraginaceae  | Irano-Turanian | Az, Za     | Therophyte      | NO  |
| 1698 | <i>Heliotropium shirazicum</i> Mozaff.                    | Boraginaceae  | Irano-Turanian | Za         | Hemicryptophyte | YES |
| 1699 | <i>Heliotropium ziegleri</i> Akhani                       | Boraginaceae  | Irano-Turanian | Al         | Therophyte      | YES |
| 1700 | <i>Heracleum anisactis</i> Boiss. & Hohen.                | Apiaceae      | Irano-Turanian | Az, Al     | Hemicryptophyte | NO  |
| 1701 | <i>Heracleum gorganicum</i> Rech.f.                       | Apiaceae      | Euro-Siberian  | Al         | Hemicryptophyte | YES |
| 1702 | <i>Heracleum rawianum</i> C.C.Towns.                      | Apiaceae      | Irano-Turanian | Az         | Hemicryptophyte | YES |
| 1703 | <i>Heracleum rechingeri</i> Manden.                       | Apiaceae      | Euro-Siberian  | Al         | Hemicryptophyte | YES |
| 1704 | <i>Hertia angustifolia</i> (DC.) Kuntze                   | Asteraceae    | Irano-Turanian | Al, Za, Ke | Chamaephyte     | NO  |
| 1705 | <i>Hesperis borbasii</i> F.Dvořák                         | Brassicaceae  | Irano-Turanian | Za         | Hemicryptophyte | YES |
| 1706 | <i>Hesperis leucoclada</i> Boiss.                         | Brassicaceae  | Irano-Turanian | Za, Ke     | Hemicryptophyte | YES |
| 1707 | <i>Hesperis luristanica</i> F.Dvořák                      | Brassicaceae  | Irano-Turanian | Za         | Hemicryptophyte | YES |
| 1708 | <i>Hesperis nivalis</i> Boiss. & Hausskn.                 | Brassicaceae  | Irano-Turanian | Az, Za     | Hemicryptophyte | NO  |
| 1709 | <i>Heteroderis pusilla</i> (Boiss.) Boiss.                | Asteraceae    | Irano-Turanian |            | Therophyte      | NO  |
| 1710 | <i>Hieracium azerbaijanense</i> Lack                      | Asteraceae    | Irano-Turanian | Az         | Hemicryptophyte | YES |
| 1711 | <i>Hieracium cheirifolium</i> Boiss. & Hausskn. ex Boiss. | Asteraceae    | Irano-Turanian | Za         | Hemicryptophyte | YES |
| 1712 | <i>Hieracium piranshahricum</i> Tavakkoli & Assadi        | Asteraceae    | Irano-Turanian | Az         | Hemicryptophyte | YES |
| 1713 | <i>Hyacinthella persica</i> (Boiss. & Buhse) Chouard      | Asparagaceae  | Euro-Siberian  |            | Geophyte        | YES |
| 1714 | <i>Hymenocephalus rigidus</i> Jaub. & Spach               | Asteraceae    | Irano-Turanian | Za         | Chamaephyte     | YES |
| 1715 | <i>Hymenocrater incanus</i> Bunge                         | Lamiaceae     | Irano-Turanian | Za         | Chamaephyte     | NO  |
| 1716 | <i>Hymenocrater oxyodontus</i> Rech.f.                    | Lamiaceae     | Irano-Turanian |            | Chamaephyte     | NO  |
| 1717 | <i>Hymenocrater platystegius</i> Rech.f.                  | Lamiaceae     | Irano-Turanian | Ko         | Chamaephyte     | NO  |
| 1718 | <i>Hymenocrater yazdianus</i> Rech.f.                     | Lamiaceae     | Irano-Turanian | Za, Ke     | Chamaephyte     | NO  |
| 1719 | <i>Hyoscyamus bornmulleri</i> Khat.                       | Solanaceae    | Irano-Turanian | Za         | Hemicryptophyte | YES |
| 1720 | <i>Hyoscyamus kotschyanus</i> Pojark.                     | Solanaceae    | Irano-Turanian | Za         | Therophyte      | NO  |
| 1721 | <i>Hyoscyamus kurdicus</i> Bornm.                         | Solanaceae    | Irano-Turanian | Az, Al, Za | Hemicryptophyte | YES |
| 1722 | <i>Hyoscyamus malekianus</i> Parsa                        | Solanaceae    | Irano-Turanian |            | Hemicryptophyte | YES |
| 1723 | <i>Hyoscyamus tenuicaulis</i> Schönb.-Tem.                | Solanaceae    | Saharo-Sindian |            | Hemicryptophyte | NO  |
| 1724 | <i>Hypericopsis persica</i> Boiss.                        | Frankeniaceae | Irano-Turanian | Za         | Chamaephyte     | NO  |

|      |                                                         |              |                                   |                |                 |     |
|------|---------------------------------------------------------|--------------|-----------------------------------|----------------|-----------------|-----|
| 1725 | <i>Hypericum dogonbadanicum</i> Assadi                  | Hypericaceae | Saharo-Sindian                    |                | Chamaephyte     | YES |
| 1726 | <i>Hypericum fursei</i> N.Robson                        | Hypericaceae | Irano-Turanian                    | Al             | Hemicryptophyte | YES |
| 1727 | <i>Indigofera sinuspersica</i> Mozaff.                  | Fabaceae     | Saharo-Sindian                    |                | Therophyte      | YES |
| 1728 | <i>Inula angustifolia</i> DC.                           | Asteraceae   | Irano-Turanian                    | ?              | Hemicryptophyte | YES |
| 1729 | <i>Inula persica</i> Ghahrem.-Nejad & Narimisa          | Asteraceae   | Irano-Turanian                    | Ke             | Hemicryptophyte | YES |
| 1730 | <i>Inula rajamandii</i> Narimisa & F.Ghahrem.           | Asteraceae   | Irano-Turanian                    | Az             | Hemicryptophyte | YES |
| 1731 | <i>Iranecio elbrusensis</i> (Boiss.) B.Nord.            | Asteraceae   | Irano-Turanian                    | Al             | Hemicryptophyte | NO  |
| 1732 | <i>Iranecio oligolepis</i> (Boiss.) B.Nord.             | Asteraceae   | Irano-Turanian                    | Al             | Hemicryptophyte | YES |
| 1733 | <i>Iranecio paucilobus</i> (DC.) B.Nord.                | Asteraceae   | Irano-Turanian                    | Az, Al, Za, Ke | Hemicryptophyte | NO  |
| 1734 | <i>Iris barnumiae</i> Foster & Baker                    | Iridaceae    | Irano-Turanian                    | Al             | Geophyte        | NO  |
| 1735 | <i>Iris meda</i> Stapf                                  | Iridaceae    | Irano-Turanian                    | Az, Za         | Geophyte        | NO  |
| 1736 | <i>Isatis campylocarpa</i> Boiss.                       | Brassicaceae | Irano-Turanian                    | Za             | Therophyte      | NO  |
| 1737 | <i>Isatis gaubae</i> Bornm.                             | Brassicaceae | Irano-Turanian                    | Al             | Hemicryptophyte | NO  |
| 1738 | <i>Isatis koeiei</i> Rech.f.                            | Brassicaceae | Saharo-Sindian                    |                | Therophyte      | YES |
| 1739 | <i>Isatis pachycarpa</i> Rech. f., Aellen & Esfand.     | Brassicaceae | Irano-Turanian                    |                | Hemicryptophyte | YES |
| 1740 | <i>Isatis raphanifolia</i> Boiss.                       | Brassicaceae | Irano-Turanian,<br>Saharo-Sindian | Za, Al, Ke     | Therophyte      | NO  |
| 1741 | <i>Isatis rugulosa</i> Bunge                            | Brassicaceae | Irano-Turanian                    | Za, Ke         | Therophyte      | NO  |
| 1742 | <i>Isatis zarrei</i> Al-Shehbaz, Moazzeni & Mumm.       | Brassicaceae | Irano-Turanian                    | Al             | Therophyte      | YES |
| 1743 | <i>Johrenia golestanica</i> Rech.f.                     | Apiaceae     | Euro-Siberian                     | Al             | Hemicryptophyte | YES |
| 1744 | <i>Johrenia ramosissima</i> Mozaff.                     | Apiaceae     | Euro-Siberian                     | Al             | Hemicryptophyte | YES |
| 1745 | <i>Johreniopsis oligactis</i> (Rech.f. & Riedl) Pimenov | Apiaceae     | Irano-Turanian                    | Za             | Hemicryptophyte | YES |
| 1746 | <i>Johreniopsis scoparia</i> (Boiss.) Pimenov           | Apiaceae     | Irano-Turanian                    | Za             | Hemicryptophyte | NO  |
| 1747 | <i>Johreniopsis stricticaulis</i> (Rech.f.) Pimen.      | Apiaceae     | Irano-Turanian                    | Ko             | Hemicryptophyte | NO  |
| 1748 | <i>Jurinea bungei</i> Boiss.                            | Asteraceae   | Irano-Turanian                    | Za, Ke         | Hemicryptophyte | NO  |
| 1749 | <i>Jurinea cartilaginea</i> Mozaff.                     | Asteraceae   | Saharo-Sindian                    |                | Chamaephyte     | YES |
| 1750 | <i>Jurinea catharinae</i> Iljin                         | Asteraceae   | Irano-Turanian                    | Ko             | Chamaephyte     | NO  |
| 1751 | <i>Jurinea cordata</i> Boiss. & Hausskn. ex Boiss.      | Asteraceae   | Irano-Turanian                    | Za             | Chamaephyte     | YES |
| 1752 | <i>Jurinea eriobasis</i> DC.                            | Asteraceae   | Irano-Turanian                    | Za             | Hemicryptophyte | NO  |
| 1753 | <i>Jurinea gabrielae</i> Bornm.                         | Asteraceae   | Irano-Turanian                    |                | Chamaephyte     | YES |
| 1754 | <i>Jurinea gedrosiaca</i> Bornm.                        | Asteraceae   | Saharo-Sindian                    |                | Chamaephyte     | YES |

|      |                                                        |                |                |                |                 |     |
|------|--------------------------------------------------------|----------------|----------------|----------------|-----------------|-----|
| 1755 | <i>Jurinea giviensis</i> Mirtadz.                      | Asteraceae     | Irano-Turanian | Az             | Hemicryptophyte | YES |
| 1756 | <i>Jurinea heterophylla</i> (Jaub. & Spach) Boiss.     | Asteraceae     | Irano-Turanian | Az, Al, Za     | Chamaephyte     | NO  |
| 1757 | <i>Jurinea inuloides</i> Boiss. & Hausskn. ex Boiss.   | Asteraceae     | Irano-Turanian | Za             | Chamaephyte     | YES |
| 1758 | <i>Jurinea jedresiaca</i> Bornm.                       | Asteraceae     | Saharo-Sindian |                | Hemicryptophyte | YES |
| 1759 | <i>Jurinea kopetensis</i> Rech.f.                      | Asteraceae     | Irano-Turanian | Ko             | Chamaephyte     | YES |
| 1760 | <i>Jurinea leptoloba</i> DC.                           | Asteraceae     | Irano-Turanian | Az             | Chamaephyte     | NO  |
| 1761 | <i>Jurinea meda</i> Bornm.                             | Asteraceae     | Irano-Turanian | Za             | Chamaephyte     | NO  |
| 1762 | <i>Jurinea mobayenii</i> Ghahr. & Mirtadz.             | Asteraceae     | Irano-Turanian | Ke             | Hemicryptophyte | YES |
| 1763 | <i>Jurinea monocephala</i> Aitch. & Hemsl.             | Asteraceae     | Irano-Turanian | Ko             | Chamaephyte     | NO  |
| 1764 | <i>Jurinea multicaulis</i> DC.                         | Asteraceae     | Irano-Turanian | Az             | Chamaephyte     | YES |
| 1765 | <i>Jurinea prasinophylla</i> Rech.f.                   | Asteraceae     | Irano-Turanian | Za             | Chamaephyte     | YES |
| 1766 | <i>Jurinea proteoides</i> Boiss. & Hausskn. ex Boiss.  | Asteraceae     | Irano-Turanian | Za             | Chamaephyte     | YES |
| 1767 | <i>Jurinea radians</i> Boiss.                          | Asteraceae     | Irano-Turanian | Az, Al, Ko, Ke | Chamaephyte     | NO  |
| 1768 | <i>Jurinea sharifiana</i> Rech.f. & Esfand.            | Asteraceae     | Irano-Turanian | Al             | Chamaephyte     | YES |
| 1769 | <i>Jurinea stenocalathia</i> Rech.f.                   | Asteraceae     | Irano-Turanian | Al, Ko, Ke     | Chamaephyte     | NO  |
| 1770 | <i>Jurinea viciosoi</i> Pau                            | Asteraceae     | Irano-Turanian | Za             | Chamaephyte     | YES |
| 1771 | <i>Jurinella frigida</i> (Boiss.) Wagenitz             | Asteraceae     | Irano-Turanian | Al             | Chamaephyte     | NO  |
| 1772 | <i>Jurinella microcephala</i> (Boiss.) Wagenitz        | Asteraceae     | Irano-Turanian | Al, Ko         | Hemicryptophyte | NO  |
| 1773 | <i>Kalakia marginata</i> (Boiss.) Alava                | Apiaceae       | Irano-Turanian | Al             | Therophyte      | NO  |
| 1774 | <i>Karvandarina aphylla</i> Rech.f., Aellen & Esfand.  | Asteraceae     | Saharo-Sindian |                | Hemicryptophyte | NO  |
| 1775 | <i>Kaviria zehzadii</i> (Akhani) Akhani                | Chenopodiaceae | Irano-Turanian |                | Therophyte      | YES |
| 1776 | <i>Kelussia odoratissima</i> Mozaff.                   | Apiaceae       | Irano-Turanian | Za             | Chamaephyte     | YES |
| 1777 | <i>Klasea calcarea</i> (Mozaff.) Ranjbar & Negaresh    | Asteraceae     | Irano-Turanian | Az             | Hemicryptophyte | YES |
| 1778 | <i>Klasea gracillima</i> (Rech.f.) L.Martins           | Asteraceae     | Irano-Turanian | Al             | Hemicryptophyte | YES |
| 1779 | <i>Klasea melanocheila</i> (Boiss. & Hausskn.) J.Holub | Asteraceae     | Irano-Turanian | Za             | Hemicryptophyte | YES |
| 1780 | <i>Klasea nana</i> Ranjbar & Negaresh                  | Asteraceae     | Irano-Turanian | Ko             | Hemicryptophyte | YES |
| 1781 | <i>Klasea sanandajensis</i> Ranjbar & Negaresh         | Asteraceae     | Irano-Turanian | Za             | Hemicryptophyte | YES |
| 1782 | <i>Klasea suffulta</i> (Rech.f.) L.Martins             | Asteraceae     | Irano-Turanian | Za             | Hemicryptophyte | YES |
| 1783 | <i>Klasea viciifolia</i> (Boiss. & Hausskn.) L.Martins | Asteraceae     | Irano-Turanian | Az, Za         | Hemicryptophyte | YES |
| 1784 | <i>Lactuca azerbaijanica</i> Rech.f.                   | Asteraceae     | Irano-Turanian | Az, Al         | Hemicryptophyte | YES |
| 1785 | <i>Lactuca birjandica</i> Mozaff.                      | Asteraceae     | Irano-Turanian |                | Hemicryptophyte | YES |

|      |                                                          |              |                                  |            |                 |     |
|------|----------------------------------------------------------|--------------|----------------------------------|------------|-----------------|-----|
| 1786 | <i>Lactuca denaensis</i> N. Kilian & Djavadi             | Asteraceae   | Irano-Turanian                   | Za         | Hemicryptophyte | YES |
| 1787 | <i>Lactuca gilanica</i> Mozaff.                          | Asteraceae   | Euro-Siberian                    |            | Hemicryptophyte | YES |
| 1788 | <i>Lactuca hazaranensis</i> Djavadi & N. Kilian          | Asteraceae   | Irano-Turanian                   | Ke         | Hemicryptophyte | YES |
| 1789 | <i>Lactuca polyclada</i> Boiss.                          | Asteraceae   | Irano-Turanian                   | Za         | Hemicryptophyte | YES |
| 1790 | <i>Lagochilus alutaceus</i> Bunge                        | Lamiaceae    | Irano-Turanian                   | Al, Ko     | Chamaephyte     | NO  |
| 1791 | <i>Lagochilus aucheri</i> Boiss.                         | Lamiaceae    | Irano-Turanian                   | Az, Al, Za | Chamaephyte     | NO  |
| 1792 | <i>Lagochilus kotschyanus</i> Boiss.                     | Lamiaceae    | Irano-Turanian                   | Az, Al     | Hemicryptophyte | NO  |
| 1793 | <i>Lagochilus lasiocalyx</i> (Stapf) Jamzad              | Lamiaceae    | Irano-Turanian                   | Za         | Chamaephyte     | NO  |
| 1794 | <i>Lagochilus lorestanicus</i> Dehshiri & Mozaff.        | Lamiaceae    | Irano-Turanian                   | Za         | Chamaephyte     | YES |
| 1795 | <i>Lagochilus macracanthus</i> Fisch. & C.A.Mey.         | Lamiaceae    | Irano-Turanian                   | Al, Za     | Chamaephyte     | NO  |
| 1796 | <i>Lagochilus quadridentatus</i> Jamzad                  | Lamiaceae    | Euro-Siberian                    | Al         | Chamaephyte     | YES |
| 1797 | <i>Lamium bakhtiaticum</i> Jamzad                        | Lamiaceae    | Irano-Turanian                   | Za         | Hemicryptophyte | YES |
| 1798 | <i>Laser rechingeri</i> Akhani                           | Apiaceae     | Euro-Siberian                    | Al         | Hemicryptophyte | YES |
| 1799 | <i>Lathyrus alamutensis</i> Mozaff., Ahavazi & Charkhch. | Fabaceae     | Irano-Turanian                   | Al         | Hemicryptophyte | YES |
| 1800 | <i>Launaea acanthodes</i> (Boiss.) Kuntze                | Asteraceae   | Irano-Turanian                   |            | Hemicryptophyte | NO  |
| 1801 | <i>Launaea bornmuelleri</i> (Hauskn. ex Bornm.) Bornm.   | Asteraceae   | Saharo-Sindian                   |            | Hemicryptophyte | YES |
| 1802 | <i>Launaea piestocarpa</i> (Boiss.) Rech.f.              | Asteraceae   | Irano-Turanian                   | Ko         | Chamaephyte     | YES |
| 1803 | <i>Lavandula sublepidota</i> Rech.f.                     | Lamiaceae    | Saharo-Sindian                   |            | Chamaephyte     | YES |
| 1804 | <i>Leontodon stenocalathius</i> Rech.f.                  | Asteraceae   | Euro-Siberian                    | Al         | Hemicryptophyte | YES |
| 1805 | <i>Leopoldia tabriziana</i> Jafari                       | Asparagaceae | Irano-Turanian                   | Az         | Geophyte        | YES |
| 1806 | <i>Lepechiniella fursei</i> Riedl                        | Boraginaceae | Irano-Turanian                   | Al         | Hemicryptophyte | YES |
| 1807 | <i>Lepechiniella persica</i> (Boiss.) Riedl              | Boraginaceae | Irano-Turanian                   | Al         | Hemicryptophyte | NO  |
| 1808 | <i>Lepechiniella wendelboi</i> Riedl                     | Boraginaceae | Irano-Turanian                   | Al         | Hemicryptophyte | NO  |
| 1809 | <i>Leucopoa pseudosclerophylla</i> (Krivot.) Bor         | Poaceae      | Irano-Turanian                   | Ke, Ko     | Hemicryptophyte | YES |
| 1810 | <i>Leutea avicennae</i> Mozaff.                          | Apiaceae     | Irano-Turanian                   | Za         | Hemicryptophyte | YES |
| 1811 | <i>Leutea cupularis</i> (Boiss.) Pimen.                  | Apiaceae     | Irano-Turanian                   | Al, Za     | Hemicryptophyte | NO  |
| 1812 | <i>Leutea elbursensis</i> Mozaff.                        | Apiaceae     | Irano-Turanian                   | Al         | Hemicryptophyte | YES |
| 1813 | <i>Leutea gracillima</i> Pimenov                         | Apiaceae     | Irano-Turanian                   | Al         | Hemicryptophyte | YES |
| 1814 | <i>Leutea kurdistanica</i> Mozaff.                       | Apiaceae     | Irano-Turanian                   | Za         | Hemicryptophyte | YES |
| 1815 | <i>Leutea nematoloba</i> (Rech.f.) Pimenov               | Apiaceae     | Irano-Turanian,<br>Euro-Siberian | Al         | Hemicryptophyte | NO  |

|      |                                                          |                  |                                  |                           |                 |     |
|------|----------------------------------------------------------|------------------|----------------------------------|---------------------------|-----------------|-----|
| 1816 | <i>Leutea petiolaris</i> (DC.) Pimenov                   | Apiaceae         | Irano-Turanian                   | Az, Al, Za, Ko            | Hemicryptophyte | NO  |
| 1817 | <i>Leutea polyscias</i> (Boiss.) Pimenov                 | Apiaceae         | Euro-Siberian                    |                           | Hemicryptophyte | YES |
| 1818 | <i>Leutea rechingeri</i> (Leute) Pimenov                 | Apiaceae         | Irano-Turanian                   | Az                        | Hemicryptophyte | YES |
| 1819 | <i>Ligularia persica</i> Boiss.                          | Asteraceae       | Irano-Turanian                   | Al                        | Hemicryptophyte | NO  |
| 1820 | <i>Lilium ledebourii</i> (Baker) Boiss.                  | Hamamelidaceae   | Euro-Siberian                    | Al                        | Hemicryptophyte | YES |
| 1821 | <i>Linaria azerbaijanensis</i> Hamdi & Assadi            | Scrophulariaceae | Irano-Turanian                   | Az                        | Hemicryptophyte | NO  |
| 1822 | <i>Linaria boushehrensensis</i> Hamdi & Assadi           | Scrophulariaceae | Saharo-Sindian                   |                           | Hemicryptophyte | NO  |
| 1823 | <i>Linaria elymaitica</i> (Boiss.) Kuprian.              | Scrophulariaceae | Irano-Turanian                   | Al, Za                    | Hemicryptophyte | YES |
| 1824 | <i>Linaria farsensis</i> Hamdi & Assadi                  | Scrophulariaceae | Irano-Turanian                   | Za                        | Hemicryptophyte | YES |
| 1825 | <i>Linaria golestanensis</i> Hamdi & Assadi              | Scrophulariaceae | Euro-Siberian                    | Al, Ko                    | Hemicryptophyte | NO  |
| 1826 | <i>Linaria guilanensis</i> Hamdi & Assadi                | Scrophulariaceae | Irano-Turanian                   | Al                        | Hemicryptophyte | YES |
| 1827 | <i>Linaria iranica</i> Hamdi & Assadi                    | Scrophulariaceae | Irano-Turanian                   | Ke                        | Hemicryptophyte | YES |
| 1828 | <i>Linaria karajensis</i> Hamdi & Assadi                 | Scrophulariaceae | Irano-Turanian                   | Al                        | Hemicryptophyte | YES |
| 1829 | <i>Linaria kavirensis</i> Hamdi & Assadi                 | Scrophulariaceae | Irano-Turanian                   |                           | Hemicryptophyte | YES |
| 1830 | <i>Linaria khalkhalensis</i> Hamdi & Assadi              | Scrophulariaceae | Irano-Turanian,<br>Euro-Siberian | Az, Al                    | Hemicryptophyte | YES |
| 1831 | <i>Linaria khorasanensis</i> Hamdi & Assadi              | Scrophulariaceae | Irano-Turanian                   | Ko                        | Hemicryptophyte | NO  |
| 1832 | <i>Linaria lineolata</i> Boiss.                          | Scrophulariaceae | Irano-Turanian                   | Al                        | Hemicryptophyte | NO  |
| 1833 | <i>Linaria mazandaranensis</i> Hamdi & Assadi            | Scrophulariaceae | Euro-Siberian                    | Al                        | Hemicryptophyte | YES |
| 1834 | <i>Linaria michauxii</i> Chav.                           | Scrophulariaceae | Irano-Turanian                   | Al, Za, Ke, Ko,<br>Az, Lo | Hemicryptophyte | NO  |
| 1835 | <i>Linaria nurensis</i> Boiss. & Hausskn.                | Scrophulariaceae | Irano-Turanian                   | Za                        | Hemicryptophyte | NO  |
| 1836 | <i>Linaria orientalis</i> Hamdi & Assadi                 | Scrophulariaceae | Irano-Turanian                   | Al                        | Hemicryptophyte | YES |
| 1837 | <i>Linaria remotiflora</i> Patzak                        | Scrophulariaceae | Irano-Turanian                   | Ke, Za                    | Hemicryptophyte | NO  |
| 1838 | <i>Linaria Shahroudensis</i> Hamdi & Assadi              | Scrophulariaceae | Irano-Turanian                   | Al                        | Hemicryptophyte | YES |
| 1839 | <i>Lindelofia kandavanensis</i> Bornm. & Gauba           | Boraginaceae     | Euro-Siberian                    | Al                        | Hemicryptophyte | YES |
| 1840 | <i>Linum persicum</i> Boiss.                             | Linaceae         | Irano-Turanian                   | Za                        | Chamaephyte     | NO  |
| 1841 | <i>Lomatopodium staurophyllum</i> (Rech.f.) Rech.f.      | Apiaceae         | Irano-Turanian                   | Al, Ko                    | Hemicryptophyte | NO  |
| 1842 | <i>Malabaila isfahanica</i> Alava                        | Apiaceae         | Irano-Turanian                   | Za                        | Hemicryptophyte | YES |
| 1843 | <i>Malabaila kotschyi</i> Boiss.                         | Apiaceae         | Irano-Turanian                   | Za, Ko                    | Hemicryptophyte | NO  |
| 1844 | <i>Malabaila porphyrodiscus</i> Stapf & Wettst. ex Stapf | Apiaceae         | Irano-Turanian                   | Za, Az                    | Hemicryptophyte | NO  |
| 1845 | <i>Marrubium cordatum</i> Nábelek                        | Lamiaceae        | Irano-Turanian                   | Az                        | Hemicryptophyte | YES |

|      |                                                                      |                 |                |                |                 |     |
|------|----------------------------------------------------------------------|-----------------|----------------|----------------|-----------------|-----|
| 1846 | <i>Marrubium eriocephalum</i> Seybold                                | Lamiaceae       | Irano-Turanian | Az             | Hemicryptophyte | YES |
| 1847 | <i>Marrubium procerum</i> Bunge                                      | Lamiaceae       | Irano-Turanian | Ko             | Hemicryptophyte | YES |
| 1848 | <i>Matthiola dumulosa</i> Boiss. & Buhse                             | Brassicaceae    | Irano-Turanian | Ko             | Chamaephyte     | NO  |
| 1849 | <i>Matthiola iranica</i> Zeraatkar, Mahmoodi, F.Ghahrem. & Maassoumi | Brassicaceae    | Irano-Turanian | Az             | Hemicryptophyte | YES |
| 1850 | <i>Matthiola ovatifolia</i> Boiss.                                   | Brassicaceae    | Irano-Turanian | Az, Al, Ke, Za | Hemicryptophyte | NO  |
| 1851 | <i>Matthiola revoluta</i> Bunge ex Boiss.                            | Brassicaceae    | Irano-Turanian | Al, Za, Ke     | Chamaephyte     | NO  |
| 1852 | <i>Matthiola shehbazii</i> Ranjbar & Karami                          | Brassicaceae    | Irano-Turanian | Za             | Hemicryptophyte | YES |
| 1853 | <i>Matthiola subglabra</i> Ponert                                    | Brassicaceae    | Irano-Turanian | Al             | Chamaephyte     | YES |
| 1854 | <i>Mattiastrum pygmaeum</i> Rech.f.                                  | Boraginaceae    | Irano-Turanian | Al             | Hemicryptophyte | YES |
| 1855 | <i>Mentha mozaffarianii</i> Jamzad                                   | Lamiaceae       | Irano-Turanian | Ke             | Hemicryptophyte | NO  |
| 1856 | <i>Michauxia koeieana</i> Rech.f.                                    | Campanulaceae   | Saharo-Sindian |                | Hemicryptophyte | YES |
| 1857 | <i>Michauxia stenophylla</i> Boiss. & Hausskn.                       | Campanulaceae   | Saharo-Sindian |                | Hemicryptophyte | NO  |
| 1858 | <i>Micrantha multicaulis</i> (Boiss.) F. Dvořák                      | Brassicaceae    | Irano-Turanian | Za, Ke         | Hemicryptophyte | NO  |
| 1859 | <i>Micromeria hedgei</i> Rech.f.                                     | Lamiaceae       | Saharo-Sindian |                | Chamaephyte     | NO  |
| 1860 | <i>Milium atropatanum</i> Maroofi                                    | Poaceae         | Irano-Turanian | Az             | Hemicryptophyte | YES |
| 1861 | <i>Minuartia acuminata</i> Turill                                    | Caryophyllaceae | Irano-Turanian | Az             | Hemicryptophyte | YES |
| 1862 | <i>Minuartia aucheriana</i> Bornm.                                   | Caryophyllaceae | Irano-Turanian | Za             | Chamaephyte     | YES |
| 1863 | <i>Minuartia glandulosa</i> (Boiss. & A. Huet) Bornm.                | Caryophyllaceae | Irano-Turanian | Az             | Hemicryptophyte | NO  |
| 1864 | <i>Minuartia khorassanica</i> Assadi & Mostafavi                     | Caryophyllaceae | Irano-Turanian |                | Hemicryptophyte | YES |
| 1865 | <i>Minuartia lineata</i> (Boiss.) Bornm.                             | Caryophyllaceae | Irano-Turanian | Al             | Hemicryptophyte | NO  |
| 1866 | <i>Minuartia litwinowii</i> Schischk.                                | Caryophyllaceae | Irano-Turanian | Al, Ko         | Hemicryptophyte | NO  |
| 1867 | <i>Minuartia sabalanica</i> Assadi & Mostafavi                       | Caryophyllaceae | Irano-Turanian | Az             | Hemicryptophyte | YES |
| 1868 | <i>Minuartia sublineata</i> Rech.f.                                  | Caryophyllaceae | Irano-Turanian | Az, Za         | Hemicryptophyte | NO  |
| 1869 | <i>Mozaffariana insignis</i> Pimenov & Maassoumi                     | Apiaceae        | Saharo-Sindian |                | Hemicryptophyte | NO  |
| 1870 | <i>Muscari kurdicum</i> Maroofi                                      | Asparagaceae    | Irano-Turanian | Za             | Geophyte        | YES |
| 1871 | <i>Muscari pseudomuscari</i> (Boiss. & Buhse) Wendelbo               | Asparagaceae    | Euro-Siberian  | Al             | Geophyte        | YES |
| 1872 | <i>Myopordon aucheri</i> Boiss.                                      | Asteraceae      | Irano-Turanian | Za             | Chamaephyte     | YES |
| 1873 | <i>Myopordon damavandica</i> Mozaff.                                 | Asteraceae      | Irano-Turanian | Al             | Chamaephyte     | YES |
| 1874 | <i>Myopordon hyrcanum</i> (Bornm.) Wagenitz                          | Asteraceae      | Irano-Turanian | Al             | Chamaephyte     | YES |
| 1875 | <i>Myopordon persicum</i> Boiss.                                     | Asteraceae      | Irano-Turanian | Za             | Chamaephyte     | YES |
| 1876 | <i>Myosotis anomala</i> Riedl                                        | Boraginaceae    | Irano-Turanian | Az             | Hemicryptophyte | NO  |

|      |                                                                                 |                  |                                   |                |                 |     |
|------|---------------------------------------------------------------------------------|------------------|-----------------------------------|----------------|-----------------|-----|
| 1877 | <i>Myosotis koelzii</i> Riedl                                                   | Boraginaceae     | Irano-Turanian                    | Za             | Therophyte      | YES |
| 1878 | <i>Nanorrhinum baluchestanicum</i> Naanaie, Assadi & Tavassoli                  | Scrophulariaceae | Saharo-Sindian                    |                | Hemicryptophyte | YES |
| 1879 | <i>Nanorrhinum campyloceras</i> (Rech.f. & Esfand.) Naanaie, Assadi & Tavassoli | Scrophulariaceae | Saharo-Sindian                    |                | Hemicryptophyte | NO  |
| 1880 | <i>Nanorrhinum chasmophyticum</i> (Wendelbo) Naanaie, Assadi & Tavassoli        | Scrophulariaceae | Saharo-Sindian                    |                | Hemicryptophyte | YES |
| 1881 | <i>Nanorrhinum khuzestanicum</i> Naanaie, Assadi & Tavassoli                    | Scrophulariaceae | Saharo-Sindian                    |                | Hemicryptophyte | NO  |
| 1882 | <i>Nectaroscordum koelzii</i> Wendelbo                                          | Alliaceae        | Irano-Turanian                    | Za             | Geophyte        | NO  |
| 1883 | <i>Neocryptodiscus persicus</i> (Boiss.) Hedge & Lamond                         | Apiaceae         | Irano-Turanian                    |                | Hemicryptophyte | NO  |
| 1884 | <i>Nepeta adenoclada</i> Bornm.                                                 | Lamiaceae        | Irano-Turanian                    | Za             | Chamaephyte     | YES |
| 1885 | <i>Nepeta allotria</i> Rech.f.                                                  | Lamiaceae        | Irano-Turanian                    | Al             | Hemicryptophyte | YES |
| 1886 | <i>Nepeta archibaldii</i> Rech.f.                                               | Lamiaceae        | Irano-Turanian                    | Za             | Chamaephyte     | YES |
| 1887 | <i>Nepeta assadii</i> Jamzad                                                    | Lamiaceae        | Irano-Turanian                    | Al, Za         | Hemicryptophyte | NO  |
| 1888 | <i>Nepeta assurgens</i> Hauskn. & Bornm.                                        | Lamiaceae        | Irano-Turanian                    | Ko, Ke         | Hemicryptophyte | NO  |
| 1889 | <i>Nepeta asterotricha</i> Rech.f.                                              | Lamiaceae        | Irano-Turanian                    | Ke             | Hemicryptophyte | YES |
| 1890 | <i>Nepeta bakhtiarica</i> Rech.f.                                               | Lamiaceae        | Irano-Turanian                    | Ke, Za         | Therophyte      | NO  |
| 1891 | <i>Nepeta balouchestanica</i> Jamzad & Ingr.                                    | Lamiaceae        | Irano-Turanian                    |                | Hemicryptophyte | YES |
| 1892 | <i>Nepeta bazoftica</i> Jamzad                                                  | Lamiaceae        | Irano-Turanian                    | Za             | Hemicryptophyte | YES |
| 1893 | <i>Nepeta binaloudensis</i> Jamzad                                              | Lamiaceae        | Irano-Turanian                    | Ko             | Hemicryptophyte | YES |
| 1894 | <i>Nepeta bokhonica</i> Jamzad                                                  | Lamiaceae        | Irano-Turanian                    | Ke             | Hemicryptophyte | YES |
| 1895 | <i>Nepeta bornmuelleri</i> Hauskn. ex Bornm.                                    | Lamiaceae        | Irano-Turanian                    | Ke             | Therophyte      | NO  |
| 1896 | <i>Nepeta cephalotes</i> Boiss.                                                 | Lamiaceae        | Irano-Turanian                    | Az, Al         | Chamaephyte     | NO  |
| 1897 | <i>Nepeta chionophila</i> Boiss. & Hauskn.                                      | Lamiaceae        | Irano-Turanian                    | Za             | Hemicryptophyte | YES |
| 1898 | <i>Nepeta crassifolia</i> Boiss. & Buhse                                        | Lamiaceae        | Irano-Turanian,<br>Euro-Siberian  | Al, Za, Ke, Ko | Hemicryptophyte | NO  |
| 1899 | <i>Nepeta crispa</i> Willd.                                                     | Lamiaceae        | Irano-Turanian                    | Za, Al         | Hemicryptophyte | NO  |
| 1900 | <i>Nepeta denudata</i> Benth.                                                   | Lamiaceae        | Irano-Turanian                    | Az, Al         | Hemicryptophyte | NO  |
| 1901 | <i>Nepeta depauperata</i> Benth.                                                | Lamiaceae        | Irano-Turanian                    | Za, Ke         | Chamaephyte     | NO  |
| 1902 | <i>Nepeta dschuparensis</i> Bornm.                                              | Lamiaceae        | Irano-Turanian,<br>Saharo-Sindian | Ke             | Chamaephyte     | NO  |
| 1903 | <i>Nepeta elymaitica</i> Bornm.                                                 | Lamiaceae        | Irano-Turanian                    | Za             | Hemicryptophyte | YES |
| 1904 | <i>Nepeta eremokosmos</i> Rech.f.                                               | Lamiaceae        | Irano-Turanian                    | Al             | Chamaephyte     | YES |



|      |                                                                  |              |                |            |                 |     |
|------|------------------------------------------------------------------|--------------|----------------|------------|-----------------|-----|
| 1905 | <i>Nepeta gloeocephala</i> Rech.f.                               | Lamiaceae    | Irano-Turanian | Za, Ke     | Hemicryptophyte | NO  |
| 1906 | <i>Nepeta hormozganica</i> Jamzad                                | Lamiaceae    | Saharo-Sindian |            | Therophyte      | NO  |
| 1907 | <i>Nepeta hymenodonta</i> Boiss.                                 | Lamiaceae    | Irano-Turanian | Ke         | Therophyte      | YES |
| 1908 | <i>Nepeta iranshahrii</i> Rech.f.                                | Lamiaceae    | Irano-Turanian | Za         | Hemicryptophyte | YES |
| 1909 | <i>Nepeta koieana</i> Rech.f.                                    | Lamiaceae    | Saharo-Sindian |            | Therophyte      | YES |
| 1910 | <i>Nepeta kotschyi</i> Boiss.                                    | Lamiaceae    | Irano-Turanian | Za         | Chamaephyte     | NO  |
| 1911 | <i>Nepeta lasiocephala</i> Benth.                                | Lamiaceae    | Irano-Turanian | Za, Ke     | Hemicryptophyte | NO  |
| 1912 | <i>Nepeta laxiflora</i> Benth.                                   | Lamiaceae    | Irano-Turanian | Za         | Hemicryptophyte | NO  |
| 1913 | <i>Nepeta macrosiphon</i> Boiss.                                 | Lamiaceae    | Irano-Turanian | Az, Za     | Hemicryptophyte | NO  |
| 1914 | <i>Nepeta mahanensis</i> Jamzad & M.Simmonds                     | Lamiaceae    | Irano-Turanian | Ke         | Therophyte      | YES |
| 1915 | <i>Nepeta makuensis</i> Jamzad & Mozaff.                         | Lamiaceae    | Irano-Turanian | Az         | Hemicryptophyte | YES |
| 1916 | <i>Nepeta menthoides</i> Boiss. & Buhse                          | Lamiaceae    | Irano-Turanian | Az, Al     | Hemicryptophyte | NO  |
| 1917 | <i>Nepeta minuticephala</i> Jamzad                               | Lamiaceae    | Irano-Turanian | Za         | Hemicryptophyte | YES |
| 1918 | <i>Nepeta monocephala</i> Rech.f.                                | Lamiaceae    | Irano-Turanian | Za         | Hemicryptophyte | YES |
| 1919 | <i>Nepeta natanzensis</i> Jamzad                                 | Lamiaceae    | Irano-Turanian | Za, Ke     | Hemicryptophyte | YES |
| 1920 | <i>Nepeta oxyodonta</i> Boiss.                                   | Lamiaceae    | Irano-Turanian | Za, Ke     | Hemicryptophyte | NO  |
| 1921 | <i>Nepeta pogonosperma</i> Jamzad & Assadi                       | Lamiaceae    | Irano-Turanian | Az, Al     | Hemicryptophyte | YES |
| 1922 | <i>Nepeta prostrata</i> Benth.                                   | Lamiaceae    | Irano-Turanian | Za         | Hemicryptophyte | NO  |
| 1923 | <i>Nepeta racemosa</i> Lam.                                      | Lamiaceae    | Irano-Turanian | Az, Al     | Hemicryptophyte | NO  |
| 1924 | <i>Nepeta rivularis</i> Bornm.                                   | Lamiaceae    | Irano-Turanian | Ke         | Hemicryptophyte | YES |
| 1925 | <i>Nepeta sahandica</i> Noroozi & Ajani                          | Lamiaceae    | Irano-Turanian | Az, Al     | Chamaephyte     | NO  |
| 1926 | <i>Nepeta schiraziana</i> Boiss.                                 | Lamiaceae    | Irano-Turanian | Za, Ke, Al | Therophyte      | NO  |
| 1927 | <i>Nepeta sessilifolia</i> Bunge                                 | Lamiaceae    | Irano-Turanian | Za         | Hemicryptophyte | NO  |
| 1928 | <i>Nepeta shahmirzadensis</i> Assadi & Jamzad                    | Lamiaceae    | Irano-Turanian | Al         | Hemicryptophyte | YES |
| 1929 | <i>Nepeta straussii</i> Hausskn. & Bormm.                        | Lamiaceae    | Irano-Turanian | Za         | Therophyte      | NO  |
| 1930 | <i>Noccaea apterocarpa</i> (Rech.f. & Aellen) Al-Shehbaz & Menke | Brassicaceae | Irano-Turanian | Ko         | Hemicryptophyte | YES |
| 1931 | <i>Noccaea tenuis</i> (Boiss. & Buhse) F.K. Mey.                 | Brassicaceae | Irano-Turanian | Az         | Hemicryptophyte | YES |
| 1932 | <i>Noccidium tuberculatum</i> F.K. Mey.                          | Brassicaceae | Euro-Siberian  | Al         | Hemicryptophyte | YES |
| 1933 | <i>Nonea anchusoides</i> Boiss. & Buhse                          | Boraginaceae | Irano-Turanian | Az         | Hemicryptophyte | NO  |
| 1934 | <i>Nonea hypoleia</i> Bornm.                                     | Boraginaceae | Irano-Turanian | Za         | Hemicryptophyte | YES |
| 1935 | <i>Nonea iranica</i> Falat. & Pakravan                           | Boraginaceae | Irano-Turanian | Al, Az, Ke | Therophyte      | NO  |

|      |                                                               |              |                |                |                 |     |
|------|---------------------------------------------------------------|--------------|----------------|----------------|-----------------|-----|
| 1936 | <i>Nonea persica</i> Boiss.                                   | Boraginaceae | Irano-Turanian | Az, Al, Za, Ke | Hemicryptophyte | NO  |
| 1937 | <i>Onobrychis alamutensis</i> Amirahm., Kaz.Osaloo, Charkhch. | Fabaceae     | Irano-Turanian | Al             | Hemicryptophyte | YES |
| 1938 | <i>Onobrychis alborzensis</i> Ranjbar & Hajmoradi             | Fabaceae     | Irano-Turanian | Al             | Hemicryptophyte | YES |
| 1939 | <i>Onobrychis andalunica</i> Bornm.                           | Fabaceae     | Irano-Turanian | Za             | Hemicryptophyte | YES |
| 1940 | <i>Onobrychis assadii</i> Ranjbar, Tolui & Amirab.            | Fabaceae     | Irano-Turanian | Ko             | Chamaephyte     | YES |
| 1941 | <i>Onobrychis aucheri</i> Boiss.                              | Fabaceae     | Irano-Turanian | Az, Al         | Therophyte      | NO  |
| 1942 | <i>Onobrychis aurea</i> Ranjbar, Amirab. & Ghahrem.           | Fabaceae     | Irano-Turanian | Az             | Hemicryptophyte | YES |
| 1943 | <i>Onobrychis depauperata</i> Boiss.                          | Fabaceae     | Irano-Turanian | Az             | Hemicryptophyte | YES |
| 1944 | <i>Onobrychis elymaitica</i> Boiss. & Hausskn. ex Boiss.      | Fabaceae     | Irano-Turanian | Za             | Chamaephyte     | YES |
| 1945 | <i>Onobrychis gaubae</i> Bornm.                               | Fabaceae     | Irano-Turanian | Az,Al          | Hemicryptophyte | NO  |
| 1946 | <i>Onobrychis gypsicola</i> Rech.f.                           | Fabaceae     | Saharo-Sindian |                | Chamaephyte     | NO  |
| 1947 | <i>Onobrychis heliocarpa</i> Boiss.                           | Fabaceae     | Irano-Turanian | Az, Al         | Therophyte      | NO  |
| 1948 | <i>Onobrychis iranensis</i> Amirab. & Ghanavati               | Fabaceae     | Irano-Turanian | Ko, Lo         | Therophyte      | NO  |
| 1949 | <i>Onobrychis iranshahrii</i> Rech.f.                         | Fabaceae     | Saharo-Sindian |                | Chamaephyte     | YES |
| 1950 | <i>Onobrychis kermanensis</i> (Sirj. & Rech.f.) Rech.f.       | Fabaceae     | Irano-Turanian | Ke             | Chamaephyte     | YES |
| 1951 | <i>Onobrychis longipes</i> Bunge                              | Fabaceae     | Irano-Turanian | Ko             | Hemicryptophyte | YES |
| 1952 | <i>Onobrychis luristanica</i> Rech.f.                         | Fabaceae     | Irano-Turanian | Za             | Hemicryptophyte | YES |
| 1953 | <i>Onobrychis marandensis</i> Amirab. & Ghanavati             | Fabaceae     | Irano-Turanian | Az             | Hemicryptophyte | YES |
| 1954 | <i>Onobrychis mazanderanica</i> Rech.f.                       | Fabaceae     | Euro-Siberian  | Al             | Hemicryptophyte | NO  |
| 1955 | <i>Onobrychis melanotricha</i> Boiss.                         | Fabaceae     | Irano-Turanian | Za, Al         | Chamaephyte     | NO  |
| 1956 | <i>Onobrychis mozaffarianii</i> Amirab.                       | Fabaceae     | Irano-Turanian | Za             | Chamaephyte     | YES |
| 1957 | <i>Onobrychis oshnaviyehensis</i> Ranjbar                     | Fabaceae     | Irano-Turanian | Az             | Hemicryptophyte | YES |
| 1958 | <i>Onobrychis oxyptera</i> Boiss.                             | Fabaceae     | Irano-Turanian | Za             | Hemicryptophyte | YES |
| 1959 | <i>Onobrychis persica</i> Sirj. & Rech.f.                     | Fabaceae     | Irano-Turanian | Az, Za         | Hemicryptophyte | NO  |
| 1960 | <i>Onobrychis plantago</i> Bornm.                             | Fabaceae     | Irano-Turanian | Ke             | Chamaephyte     | YES |
| 1961 | <i>Onobrychis psoraleifolia</i> Boiss.                        | Fabaceae     | Irano-Turanian | Za             | Hemicryptophyte | NO  |
| 1962 | <i>Onobrychis ptychophylla</i> Sirj. & Rech.f.                | Fabaceae     | Irano-Turanian | Ko             | Chamaephyte     | YES |
| 1963 | <i>Onobrychis rechingerorum</i> Wendelbo                      | Fabaceae     | Saharo-Sindian |                | Therophyte      | YES |
| 1964 | <i>Onobrychis scrobiculata</i> Boiss.                         | Fabaceae     | Irano-Turanian | Za, Az         | Hemicryptophyte | NO  |
| 1965 | <i>Onobrychis sojakii</i> Rech.f.                             | Fabaceae     | Irano-Turanian | Za             | Hemicryptophyte | YES |
| 1966 | <i>Onobrychis subnitens</i> Bornm.                            | Fabaceae     | Irano-Turanian | Az             | Chamaephyte     | NO  |

|      |                                                             |              |                |                |                 |     |
|------|-------------------------------------------------------------|--------------|----------------|----------------|-----------------|-----|
| 1967 | <i>Onobrychis susiana</i> Nabelek                           | Fabaceae     | Saharo-Sindian |                | Hemicryptophyte | YES |
| 1968 | <i>Onobrychis szovitsii</i> Boiss.                          | Fabaceae     | Irano-Turanian | Az             | Chamaephyte     | YES |
| 1969 | <i>Onobrychis talagonica</i> Rech.f.                        | Fabaceae     | Irano-Turanian | Al             | Chamaephyte     | YES |
| 1970 | <i>Onopordon carmanicum</i> (Bornm.) Bornm.                 | Asteraceae   | Irano-Turanian | Ke, Lo         | Hemicryptophyte | NO  |
| 1971 | <i>Onosma azarbaidjanensis</i> Mehrabian                    | Boraginaceae | Irano-Turanian | Az             | Hemicryptophyte | YES |
| 1972 | <i>Onosma bilabiata</i> Boiss. & Buhse                      | Boraginaceae | Irano-Turanian | Az, Za         | Hemicryptophyte | NO  |
| 1973 | <i>Onosma bisotunensis</i> Attar & Hamzehee                 | Boraginaceae | Irano-Turanian | Za             | Hemicryptophyte | YES |
| 1974 | <i>Onosma chrysochaetum</i> Bornm.                          | Boraginaceae | Irano-Turanian | Az, Al, Za     | Hemicryptophyte | NO  |
| 1975 | <i>Onosma demavendica</i> Riedl                             | Boraginaceae | Irano-Turanian | Al, Za         | Hemicryptophyte | NO  |
| 1976 | <i>Onosma ghahremanii</i> Attar & Naqinezhad                | Boraginaceae | Irano-Turanian | Al             | Hemicryptophyte | YES |
| 1977 | <i>Onosma iranshahrii</i> Ghahr. & Attar                    | Boraginaceae | Irano-Turanian | Za             | Hemicryptophyte | YES |
| 1978 | <i>Onosma khorassanica</i> Attar & Joharchi                 | Boraginaceae | Irano-Turanian | Ko             | Hemicryptophyte | YES |
| 1979 | <i>Onosma kilouyense</i> Boiss. & Hausskn.                  | Boraginaceae | Irano-Turanian | Al, Za         | Hemicryptophyte | NO  |
| 1980 | <i>Onosma kotschyi</i> Boiss.                               | Boraginaceae | Irano-Turanian | Az, Al, Za, Ke | Hemicryptophyte | NO  |
| 1981 | <i>Onosma maculata</i> Ranjbar & Almasi                     | Boraginaceae | Irano-Turanian | Za             | Hemicryptophyte | YES |
| 1982 | <i>Onosma mozaffariani</i> Mehrabian                        | Boraginaceae | Irano-Turanian | Za             | Hemicryptophyte | YES |
| 1983 | <i>Onosma pachypoda</i> Boiss.                              | Boraginaceae | Irano-Turanian | Al, Az, Za     | Hemicryptophyte | NO  |
| 1984 | <i>Onosma platyphylla</i> Riedl                             | Boraginaceae | Irano-Turanian | Za             | Hemicryptophyte | NO  |
| 1985 | <i>Onosma sabalanica</i> Ponert                             | Boraginaceae | Irano-Turanian | Az             | Hemicryptophyte | YES |
| 1986 | <i>Onosma sheidaii</i> Mehrabian                            | Boraginaceae | Irano-Turanian | Za             | Hemicryptophyte | YES |
| 1987 | <i>Onosma stenosphon</i> Boiss.                             | Boraginaceae | Irano-Turanian | Az, Al, Ke, Ko | Hemicryptophyte | NO  |
| 1988 | <i>Onosma straussii</i> (Riedl) Khat.                       | Boraginaceae | Irano-Turanian | Za             | Hemicryptophyte | NO  |
| 1989 | <i>Ophrys kurdistanica</i> Renz                             | Orchidaceae  | Irano-Turanian | Az             | Geophyte        | YES |
| 1990 | <i>Ophrys turcomanica</i> Renz                              | Orchidaceae  | Euro-Siberian  |                | Geophyte        | YES |
| 1991 | <i>Opoidia galbanifera</i> Lindl.                           | Apiaceae     | Irano-Turanian | Ko             | Hemicryptophyte | YES |
| 1992 | <i>Opsicarpium insignis</i> Mozaff.                         | Apiaceae     | Irano-Turanian | Az, Za         | Hemicryptophyte | NO  |
| 1993 | <i>Oreophysa microphylla</i> (Jaub. & Spach) Browicz        | Fabaceae     | Irano-Turanian | Al             | Chamaephyte     | NO  |
| 1994 | <i>Ornithogalum boissieri</i> Bidarlord & F.Ghahrem.        | Asparagaceae | Irano-Turanian | Al             | Geophyte        | YES |
| 1995 | <i>Ornithogalum khuzestanicum</i> Heidaryan, Hamdi & Assadi | Asparagaceae | Saharo-Sindian |                | Geophyte        | YES |
| 1996 | <i>Ornithogalum pycnanthum</i> Wendelbo                     | Asparagaceae | Irano-Turanian | Za             | Geophyte        | YES |
| 1997 | <i>Ornithogalum sanandajense</i> Maroofi                    | Asparagaceae | Irano-Turanian | Za             | Geophyte        | YES |

|      |                                                |               |                |            |                 |     |
|------|------------------------------------------------|---------------|----------------|------------|-----------------|-----|
| 1998 | <i>Orobanche eriophora</i> Bornm. & Gauba      | Orobanchaceae | Euro-Siberian  | Al         | Geophyte        | YES |
| 1999 | <i>Orobanche longibracteata</i> Schiman-Czeika | Orobanchaceae | Irano-Turanian | Za         | Geophyte        | YES |
| 2000 | <i>Orobanche pulchra</i> Gilli                 | Orobanchaceae | Irano-Turanian | Al, Za, Ko | Geophyte        | NO  |
| 2001 | <i>Orobanche schwingenschussii</i> Gilli       | Orobanchaceae | Irano-Turanian | Al         | Geophyte        | YES |
| 2002 | <i>Otostegia michauxii</i> Briq.               | Lamiaceae     | Irano-Turanian | Za         | Chamaephyte     | YES |
| 2003 | <i>Oxytropis aellenii</i> Vassilcz.            | Fabaceae      | Irano-Turanian | Al         | Hemicryptophyte | YES |
| 2004 | <i>Oxytropis azerbaijanica</i> Podlech         | Fabaceae      | Irano-Turanian | Az         | Hemicryptophyte | YES |
| 2005 | <i>Oxytropis bakhtiarica</i> Maassoumi         | Fabaceae      | Irano-Turanian | Za         | Hemicryptophyte | YES |
| 2006 | <i>Oxytropis bicornis</i> Vassilcz.            | Fabaceae      | Irano-Turanian | Al, Ko     | Hemicryptophyte | NO  |
| 2007 | <i>Oxytropis binaludensis</i> Vassilcz.        | Fabaceae      | Irano-Turanian | Al, Ko     | Hemicryptophyte | NO  |
| 2008 | <i>Oxytropis chrysocarpa</i> Boiss.            | Fabaceae      | Irano-Turanian | Al, Za, Lo | Hemicryptophyte | NO  |
| 2009 | <i>Oxytropis cinerea</i> Vassilcz.             | Fabaceae      | Irano-Turanian | Al         | Hemicryptophyte | YES |
| 2010 | <i>Oxytropis compacta</i> Maassoumi & Joharchi | Fabaceae      | Irano-Turanian | Ko         | Hemicryptophyte | YES |
| 2011 | <i>Oxytropis gracillima</i> Vassilcz.          | Fabaceae      | Irano-Turanian | Ko         | Hemicryptophyte | YES |
| 2012 | <i>Oxytropis guilanica</i> Maassoumi & Moradi  | Fabaceae      | Irano-Turanian | Az         | Hemicryptophyte | YES |
| 2013 | <i>Oxytropis hypsophila</i> Bunge ex Boiss.    | Fabaceae      | Irano-Turanian | Ko, Lo     | Hemicryptophyte | NO  |
| 2014 | <i>Oxytropis indurata</i> Maassoumi            | Fabaceae      | Irano-Turanian | Ko         | Hemicryptophyte | YES |
| 2015 | <i>Oxytropis Iranica</i> Vassilcz.             | Fabaceae      | Irano-Turanian | Al         | Hemicryptophyte | YES |
| 2016 | <i>Oxytropis javaherdehi</i> Maassoumi         | Fabaceae      | Euro-Siberian  | Al         | Hemicryptophyte | YES |
| 2017 | <i>Oxytropis karjaginii</i> Grossh.            | Fabaceae      | Irano-Turanian | Az, Al, Za | Hemicryptophyte | YES |
| 2018 | <i>Oxytropis kermanica</i> Freyn & Bornm.      | Fabaceae      | Irano-Turanian | Al, Za, Ke | Hemicryptophyte | NO  |
| 2019 | <i>Oxytropis kordkoyensis</i> Maassoumi        | Fabaceae      | Euro-Siberian  | Al         | Hemicryptophyte | YES |
| 2020 | <i>Oxytropis kuchanensis</i> Vassilcz.         | Fabaceae      | Irano-Turanian | Al, Ko     | Hemicryptophyte | NO  |
| 2021 | <i>Oxytropis mahneshanensis</i> Maassoumi      | Fabaceae      | Irano-Turanian | Az         | Hemicryptophyte | YES |
| 2022 | <i>Oxytropis masanderanensis</i> Vassilcz.     | Fabaceae      | Irano-Turanian | Al, Za     | Hemicryptophyte | YES |
| 2023 | <i>Oxytropis neorechingeriana</i> Vassilcz.    | Fabaceae      | Irano-Turanian | Ko         | Hemicryptophyte | YES |
| 2024 | <i>Oxytropis persica</i> Boiss.                | Fabaceae      | Irano-Turanian | Az, Al     | Hemicryptophyte | NO  |
| 2025 | <i>Oxytropis pseudosuavis</i> Maassoumi        | Fabaceae      | Irano-Turanian |            | Hemicryptophyte | YES |
| 2026 | <i>Oxytropis rechingeri</i> Vassilcz.          | Fabaceae      | Irano-Turanian | Ko         | Hemicryptophyte | YES |
| 2027 | <i>Oxytropis rhodontha</i> Vassilcz.           | Fabaceae      | Irano-Turanian | Az         | Hemicryptophyte | YES |
| 2028 | <i>Oxytropis rudbariensis</i> Vassilcz.        | Fabaceae      | Irano-Turanian | Al         | Hemicryptophyte | YES |

|      |                                                                       |                  |                                   |            |                 |     |
|------|-----------------------------------------------------------------------|------------------|-----------------------------------|------------|-----------------|-----|
| 2029 | <i>Oxytropis sabzavarensis</i> Maassoumi                              | Fabaceae         | Irano-Turanian                    | Ko         | Hemicryptophyte | YES |
| 2030 | <i>Oxytropis salukensis</i> Maassoumi                                 | Fabaceae         | Irano-Turanian                    | Ko         | Hemicryptophyte | YES |
| 2031 | <i>Oxytropis shahvarica</i> Maassoumi                                 | Fabaceae         | Irano-Turanian                    | Al         | Hemicryptophyte | YES |
| 2032 | <i>Oxytropis shirkuhi</i> Vassilcz.                                   | Fabaceae         | Irano-Turanian                    | Ke         | Hemicryptophyte | YES |
| 2033 | <i>Oxytropis sivehensis</i> Maassoumi & Amini Rad                     | Fabaceae         | Irano-Turanian                    | Az         | Hemicryptophyte | YES |
| 2034 | <i>Oxytropis surmandehi</i> Vassilcz.                                 | Fabaceae         | Irano-Turanian                    | Za         | Hemicryptophyte | YES |
| 2035 | <i>Oxytropis szovitsii</i> Boiss. & Buhse                             | Fabaceae         | Irano-Turanian                    | Az, Ko     | Hemicryptophyte | NO  |
| 2036 | <i>Oxytropis yazdi</i> Vassilcz.                                      | Fabaceae         | Irano-Turanian                    | Ke         | Hemicryptophyte | YES |
| 2037 | <i>Oxytropis zangolehensis</i> Vassilcz.                              | Fabaceae         | Irano-Turanian                    | Al         | Hemicryptophyte | YES |
| 2038 | <i>Papaver armeniacum</i> (L.) DC.                                    | Papaveraceae     | Irano-Turanian                    | Al, Lo     | Therophyte      | YES |
| 2039 | <i>Papaver gaubae</i> Cullen & Rech.f.                                | Papaveraceae     | Irano-Turanian                    | Al, Lo     | Therophyte      | YES |
| 2040 | <i>Papaver persicum</i> Lindl.                                        | Papaveraceae     | Irano-Turanian                    | Az         | Hemicryptophyte | NO  |
| 2041 | <i>Papaver tenuifolium</i> Boiss. & Hohen.                            | Papaveraceae     | Irano-Turanian                    | Al, Za     | Hemicryptophyte | NO  |
| 2042 | <i>Paracaryum cyclhymenium</i> (Boiss.) Riedl                         | Boraginaceae     | Irano-Turanian                    | Al, Za, Ke | Hemicryptophyte | NO  |
| 2043 | <i>Paracaryum glandulosum</i> Khat.                                   | Boraginaceae     | Irano-Turanian                    | Za         | Hemicryptophyte | YES |
| 2044 | <i>Paracaryum gracile</i> Czerniak.                                   | Boraginaceae     | Irano-Turanian                    | Ko         | Hemicryptophyte | YES |
| 2045 | <i>Paracaryum khorassanicum</i> Khat.                                 | Boraginaceae     | Irano-Turanian                    | Ko         | Hemicryptophyte | YES |
| 2046 | <i>Paracaryum luristanicum</i> Nábělek                                | Boraginaceae     | Irano-Turanian,<br>Saharo-Sindian |            | Hemicryptophyte | NO  |
| 2047 | <i>Paracaryum modestum</i> Boiss. & Hausskn.                          | Boraginaceae     | Irano-Turanian                    | Za, Ke     | Hemicryptophyte | NO  |
| 2048 | <i>Paracaryum persicum</i> (Boiss.) Boiss.                            | Boraginaceae     | Irano-Turanian                    | Za, Ke, Al | Hemicryptophyte | NO  |
| 2049 | <i>Paracaryum pygmaeum</i> (Rech.f.) D.Heller                         | Boraginaceae     | Irano-Turanian                    | Al         | Hemicryptophyte | YES |
| 2050 | <i>Paracaryum tenerum</i> Bormm.                                      | Boraginaceae     | Irano-Turanian                    | Za         | Hemicryptophyte | YES |
| 2051 | <i>Paraquilegia caespitosa</i> (Boiss. & Hohen.) J.R. Drumm. & Hutch. | Ranunculaceae    | Irano-Turanian                    | Al         | Hemicryptophyte | YES |
| 2052 | <i>Parlatoria rostrata</i> Boiss.                                     | Brassicaceae     | Irano-Turanian                    | Al, Za     | Therophyte      | NO  |
| 2053 | <i>Paronychia bungei</i> Boiss.                                       | Caryophyllaceae  | Irano-Turanian,<br>Saharo-Sindian |            | Chamaephyte     | NO  |
| 2054 | <i>Paronychia caespitosa</i> Stapf                                    | Caryophyllaceae  | Irano-Turanian                    | Al, Za     | Hemicryptophyte | NO  |
| 2055 | <i>Paronychia lordeganica</i> Dinarvand & Assadi                      | Caryophyllaceae  | Irano-Turanian                    | Za         | Hemicryptophyte | YES |
| 2056 | <i>Parrotia persica</i> C.A.Mey.                                      | Hamamelidaceae   | Euro-Siberian                     | Al         | Phanerophyte    | NO  |
| 2057 | <i>Pedicularis rechingeri</i> Wendelbo                                | Scrophulariaceae | Irano-Turanian                    | Ko         | Hemicryptophyte | YES |
| 2058 | <i>Pedicularis straussii</i> Hausskn.                                 | Scrophulariaceae | Irano-Turanian                    | Za         | Hemicryptophyte | YES |

|      |                                                                   |                 |                                                     |            |                 |     |
|------|-------------------------------------------------------------------|-----------------|-----------------------------------------------------|------------|-----------------|-----|
| 2059 | <i>Pentanema flexuosum</i> (Boiss. & Hausskn.) Rech.f.            | Asteraceae      | Irano-Turanian                                      | Az, Za     | Hemicryptophyte | NO  |
| 2060 | <i>Pentanema kurdistanicum</i> Maroofi & Ghaderi                  | Asteraceae      | Irano-Turanian                                      | Az         | Hemicryptophyte | YES |
| 2061 | <i>Pentanema multicaule</i> Boiss.                                | Asteraceae      | Irano-Turanian                                      | Za         | Chamaephyte     | NO  |
| 2062 | <i>Pentanema pulcariiforme</i> (DC.) Rech.f.                      | Asteraceae      | Irano-Turanian                                      | Al, Za     | Chamaephyte     | NO  |
| 2063 | <i>Petrorhagia macra</i> (Boiss. & Hausskn.) P.W.Ball & Heywood   | Caryophyllaceae | Irano-Turanian                                      | Za         | Hemicryptophyte | YES |
| 2064 | <i>Peucedanum chenur</i> Mozaff.                                  | Apiaceae        | Irano-Turanian                                      | Za         | Hemicryptophyte | YES |
| 2065 | <i>Peucedanum glaucopruinosum</i> Rech.f.                         | Apiaceae        | Euro-Siberian                                       | Al         | Hemicryptophyte | YES |
| 2066 | <i>Peucedanum knappii</i> Bormm.                                  | Apiaceae        | Irano-Turanian                                      | Az         | Hemicryptophyte | YES |
| 2067 | <i>Peucedanum pimenovii</i> Mozaff.                               | Apiaceae        | Euro-Siberian                                       | Al         | Hemicryptophyte | YES |
| 2068 | <i>Peucedanum translucens</i> Rech.f.                             | Apiaceae        | Euro-Siberian                                       | Al         | Hemicryptophyte | YES |
| 2069 | <i>Phagnalon persicum</i> Boiss.                                  | Asteraceae      | Irano-Turanian                                      | Za, Ke     | Chamaephyte     | NO  |
| 2070 | <i>Phleum iranicum</i> Bormm. & Gauba                             | Poaceae         | Irano-Turanian                                      | Al         | Hemicryptophyte | NO  |
| 2071 | <i>Phlomis anisodonta</i> Boiss.                                  | Lamiaceae       | Irano-Turanian                                      | Al, Za     | Hemicryptophyte | NO  |
| 2072 | <i>Phlomis aucheri</i> Boiss.                                     | Lamiaceae       | Irano-Turanian                                      | Za, Ke     | Hemicryptophyte | NO  |
| 2073 | <i>Phlomis chorassanica</i> Bunge                                 | Lamiaceae       | Irano-Turanian                                      | Ko         | Hemicryptophyte | YES |
| 2074 | <i>Phlomis elliptica</i> Benth.                                   | Lamiaceae       | Irano-Turanian                                      | Za         | Chamaephyte     | NO  |
| 2075 | <i>Phlomis ghilanensis</i> K.Koch                                 | Lamiaceae       | Irano-Turanian                                      |            | Hemicryptophyte | YES |
| 2076 | <i>Phlomis lurestanica</i> Jamzad                                 | Lamiaceae       | Irano-Turanian                                      | Za         | Hemicryptophyte | YES |
| 2077 | <i>Phlomis mazandarantica</i> Jamzad                              | Lamiaceae       | Euro-Siberian                                       | Al         | Hemicryptophyte | YES |
| 2078 | <i>Phlomis pachyphylla</i> Rech.f.                                | Lamiaceae       | Saharo-Sindian                                      |            | Hemicryptophyte | NO  |
| 2079 | <i>Phlomis persica</i> Boiss.                                     | Lamiaceae       | Irano-Turanian,<br>Euro-Siberian,<br>Saharo-Sindian | Al, Za     | Hemicryptophyte | NO  |
| 2080 | <i>Phlomoides adenantha</i> (Jaub. & Spach) Kamelin & Makhm.      | Lamiaceae       | Irano-Turanian,<br>Saharo-Sindian                   | Za, Ke     | Hemicryptophyte | NO  |
| 2081 | <i>Phlomoides azerbaijanica</i> (Rech.f.) Kamelin & Makhm.        | Lamiaceae       | Irano-Turanian                                      | Az         | Hemicryptophyte | NO  |
| 2082 | <i>Phlomoides codonocalyx</i> (Rech.f.) Kamelin & Makhm.          | Lamiaceae       | Irano-Turanian                                      |            | Hemicryptophyte | YES |
| 2083 | <i>Phlomoides hyoscyamoides</i> (Boiss. & Buhse) Kamelin & Makhm. | Lamiaceae       | Irano-Turanian                                      | Ko, Lo     | Hemicryptophyte | NO  |
| 2084 | <i>Phlomoides kermanica</i> Ranjbar & C.Mahmoudi                  | Lamiaceae       | Irano-Turanian                                      | Ke         | Hemicryptophyte | YES |
| 2085 | <i>Phlomoides lanata</i> (Jamzad) Salmaki                         | Lamiaceae       | Irano-Turanian                                      | Al         | Hemicryptophyte | YES |
| 2086 | <i>Phlomoides pulvinaris</i> (Jaub. & Spach) Kamelin & Makhm.     | Lamiaceae       | Irano-Turanian                                      | Za, Ko, Al | Hemicryptophyte | NO  |
| 2087 | <i>Phuopsis stylosa</i> (Trin.) Hook.f. ex B.D.Jacks.             | Rubiaceae       | Euro-Siberian                                       | Al         | Hemicryptophyte | NO  |

|      |                                                         |                |                                   |             |                 |     |
|------|---------------------------------------------------------|----------------|-----------------------------------|-------------|-----------------|-----|
| 2088 | <i>Physogeton acanthophyllus</i> Jaub. & Spach          | Chenopodiaceae | Irano-Turanian                    | Za, Az, Al  | Therophyte      | NO  |
| 2089 | <i>Physogeton occultus</i> (Bunge) Assadi               | Chenopodiaceae | Irano-Turanian                    |             | Therophyte      | NO  |
| 2090 | <i>Physogeton pedunculatus</i> (Assadi) Assadi          | Chenopodiaceae | Saharo-Sindian                    |             | Therophyte      | YES |
| 2091 | <i>Physoptychis gnaphalodes</i> Boiss.                  | Brassicaceae   | Irano-Turanian                    | Az, Za, Al  | Hemicryptophyte | NO  |
| 2092 | <i>Pimpinella anisactis</i> Rech.f.                     | Apiaceae       | Irano-Turanian                    | Az, Al ,Ko  | Hemicryptophyte | NO  |
| 2093 | <i>Pimpinella deverroides</i> Boiss.                    | Apiaceae       | Irano-Turanian                    | Za          | Hemicryptophyte | NO  |
| 2094 | <i>Pimpinella dichotoma</i> (Boiss. & Hausskn.) H.Wolff | Apiaceae       | Irano-Turanian                    | Za, Ke      | Hemicryptophyte | NO  |
| 2095 | <i>Pimpinella gedrosiaca</i> Bornm.                     | Apiaceae       | Irano-Turanian                    |             | Hemicryptophyte | YES |
| 2096 | <i>Pimpinella khayyamii</i> Mozaff.                     | Apiaceae       | Irano-Turanian                    | Ko          | Hemicryptophyte | YES |
| 2097 | <i>Pimpinella khorasanica</i> Engstrand                 | Apiaceae       | Irano-Turanian                    | Ko          | Hemicryptophyte | NO  |
| 2098 | <i>Pimpinella tragioides</i> Boiss.                     | Apiaceae       | Irano-Turanian                    | Az, Al      | Hemicryptophyte | NO  |
| 2099 | <i>Piptatherum denaense</i> Hamzehee & Assadi           | Poaceae        | Irano-Turanian                    | Za          | Hemicryptophyte | YES |
| 2100 | <i>Piptatherum molinioides</i> Boiss.                   | Poaceae        | Irano-Turanian                    | Al, Za , Ke | Hemicryptophyte | NO  |
| 2101 | <i>Plantago podlechii</i> Akhani                        | Plantaginaceae | Euro-Siberian                     |             | Chamaephyte     | YES |
| 2102 | <i>Platychaete aucheri</i> (Boiss.) Boiss.              | Asteraceae     | Irano-Turanian,<br>Saharo-Sindian |             | Chamaephyte     | NO  |
| 2103 | <i>Platychaete mucronifolia</i> (Boiss.) Boiss.         | Asteraceae     | Irano-Turanian,<br>Saharo-Sindian |             | Chamaephyte     | NO  |
| 2104 | <i>Platychaete velutina</i> Boiss. & Hausskn. ex Boiss. | Asteraceae     | Saharo-Sindian                    |             | Chamaephyte     | YES |
| 2105 | <i>Poa demavandica</i> Assadi & Kavousi                 | Poaceae        | Irano-Turanian                    | Al          | Hemicryptophyte | YES |
| 2106 | <i>Poa golestanensis</i> H.Scholz & Akhani              | Poaceae        | Euro-Siberian                     |             | Hemicryptophyte | YES |
| 2107 | <i>Polygala platyptera</i> Bornm. & Gauba               | Polygalaceae   | Irano-Turanian,<br>Euro-Siberian  | Al          | Hemicryptophyte | NO  |
| 2108 | <i>Polygonum aridum</i> Boiss. & Hausskn.               | Polygonaceae   | Irano-Turanian                    | Za          | Chamaephyte     | NO  |
| 2109 | <i>Polygonum botuliforme</i> Mozaff.                    | Polygonaceae   | Irano-Turanian                    | Za          | Hemicryptophyte | YES |
| 2110 | <i>Polygonum dumosum</i> Boiss.                         | Polygonaceae   | Irano-Turanian                    | Za, Ke      | Chamaephyte     | NO  |
| 2111 | <i>Polygonum hyrcanicum</i> Rech.f.                     | Polygonaceae   | Irano-Turanian,<br>Euro-Siberian  | Al, Lo      | Hemicryptophyte | NO  |
| 2112 | <i>Polygonum iranikum</i> Mozaff.                       | Polygonaceae   | Irano-Turanian                    | Za          | Chamaephyte     | YES |
| 2113 | <i>Polygonum salicornioides</i> Jaub. & Spach ex Boiss. | Polygonaceae   | Irano-Turanian                    | Za, Ke      | Chamaephyte     | NO  |
| 2114 | <i>Polygonum spinosum</i> H.Gross                       | Polygonaceae   | Irano-Turanian                    | Ke          | Chamaephyte     | NO  |
| 2115 | <i>Polylophium involucreatum</i> Boiss.                 | Apiaceae       | Euro-Siberian                     | Al          | Hemicryptophyte | NO  |

|      |                                                        |             |                                   |                       |                 |     |
|------|--------------------------------------------------------|-------------|-----------------------------------|-----------------------|-----------------|-----|
| 2116 | <i>Postia bombycina</i> Boiss. & Hausskn.              | Asteraceae  | Irano-Turanian,<br>Saharo-Sindian |                       | Chamaephyte     | YES |
| 2117 | <i>Postia puberula</i> Boiss. & Hausskn.               | Asteraceae  | Saharo-Sindian                    |                       | Chamaephyte     | NO  |
| 2118 | <i>Potentilla argyroloma</i> Boiss. & Hohen.           | Rosaceae    | Irano-Turanian                    | Al, Za                | Hemicryptophyte | NO  |
| 2119 | <i>Potentilla aucheriana</i> Th.Wolf ex Bornm.         | Rosaceae    | Irano-Turanian                    | Al, Az                | Hemicryptophyte | NO  |
| 2120 | <i>Potentilla elvendensis</i> Boiss.                   | Rosaceae    | Irano-Turanian                    | Za                    | Hemicryptophyte | NO  |
| 2121 | <i>Potentilla farsistanica</i> Browicz                 | Rosaceae    | Irano-Turanian                    | Za                    | Hemicryptophyte | YES |
| 2122 | <i>Potentilla flaccida</i> Th.Wolf ex Bornm.           | Rosaceae    | Irano-Turanian                    | Al, Za                | Hemicryptophyte | NO  |
| 2123 | <i>Potentilla gaubaeana</i> Bornm.                     | Rosaceae    | Irano-Turanian                    | Al                    | Hemicryptophyte | YES |
| 2124 | <i>Potentilla gilanica</i> (Th.Wolf) Th.Wolf           | Rosaceae    | Euro-Siberian                     | Al                    | Hemicryptophyte | YES |
| 2125 | <i>Potentilla iranica</i> (Rech.f.) Schiman-Czeika     | Rosaceae    | Irano-Turanian                    | Al, Az, Ko            | Hemicryptophyte | NO  |
| 2126 | <i>Potentilla kandavanensis</i> Bornm. & Gauba         | Rosaceae    | Irano-Turanian                    | Al                    | Hemicryptophyte | YES |
| 2127 | <i>Potentilla lignosa</i> Willd. ex Schltldl.          | Rosaceae    | Irano-Turanian                    | Al, Za                | Hemicryptophyte | YES |
| 2128 | <i>Potentilla mallota</i> Boiss.                       | Rosaceae    | Irano-Turanian                    | Al, Za                | Hemicryptophyte | YES |
| 2129 | <i>Potentilla nuda</i> Boiss.                          | Rosaceae    | Irano-Turanian                    | Az, Al, Za, Ke,<br>Ko | Hemicryptophyte | NO  |
| 2130 | <i>Potentilla nurensis</i> Boiss. & Hausskn. ex Boiss. | Rosaceae    | Irano-Turanian                    | Az, Za                | Hemicryptophyte | NO  |
| 2131 | <i>Potentilla pannosa</i> Boiss. & Hausskn. ex Boiss.  | Rosaceae    | Irano-Turanian                    | Al, Za                | Hemicryptophyte | NO  |
| 2132 | <i>Potentilla petraea</i> Willd. ex Schltldl.          | Rosaceae    | Irano-Turanian                    | Al                    | Hemicryptophyte | YES |
| 2133 | <i>Potentilla polyschista</i> Boiss. & Hohen.          | Rosaceae    | Irano-Turanian                    | Al, Az                | Hemicryptophyte | NO  |
| 2134 | <i>Potentilla porphyrantha</i> Juz.                    | Rosaceae    | Irano-Turanian                    | Az, Al                | Hemicryptophyte | NO  |
| 2135 | <i>Potentilla poteriifolia</i> Boiss.                  | Rosaceae    | Irano-Turanian                    | Al, Za, Ke            | Hemicryptophyte | NO  |
| 2136 | <i>Potentilla radiata</i> Lehm.                        | Rosaceae    | Euro-Siberian                     | Al                    | Hemicryptophyte | YES |
| 2137 | <i>Potentilla schiraziana</i> Khat.                    | Rosaceae    | Irano-Turanian                    | Za                    | Hemicryptophyte | YES |
| 2138 | <i>Prangos calligonoides</i> Rech.f.                   | Apiaceae    | Irano-Turanian                    | Za                    | Hemicryptophyte | YES |
| 2139 | <i>Prangos cheilanthifolia</i> Boiss.                  | Apiaceae    | Irano-Turanian                    | Al, Za, Ke            | Hemicryptophyte | NO  |
| 2140 | <i>Prangos crossoptera</i> Herrnst. & Heyn             | Apiaceae    | Irano-Turanian                    | Za                    | Hemicryptophyte | YES |
| 2141 | <i>Prangos gaubae</i> (Bornm.) Herrnstadt & Heyn       | Apiaceae    | Irano-Turanian                    | Az, Al, Ko            | Hemicryptophyte | NO  |
| 2142 | <i>Prangos tuberculata</i> Boiss. & Hausskn.           | Apiaceae    | Irano-Turanian                    | Za, Ke                | Hemicryptophyte | NO  |
| 2143 | <i>Primula gaubaeana</i> Bornm.                        | Primulaceae | Irano-Turanian                    | Al, Za, Lo            | Hemicryptophyte | NO  |
| 2144 | <i>Psephellus congestus</i> (Wagenitz) Wagenitz        | Asteraceae  | Irano-Turanian                    | Az                    | Hemicryptophyte | YES |
| 2145 | <i>Psephellus khalkhalensis</i> Ranjbar & Negaresh     | Asteraceae  | Euro-Siberian                     |                       | Hemicryptophyte | YES |



|      |                                                                            |               |                                  |            |                 |     |
|------|----------------------------------------------------------------------------|---------------|----------------------------------|------------|-----------------|-----|
| 2146 | <i>Pseudocamelina aphragmodes</i> (Boiss.) N. Busch                        | Brassicaceae  | Irano-Turanian                   | Za         | Hemicryptophyte | YES |
| 2147 | <i>Pseudocamelina camelinae</i> N. Busch                                   | Brassicaceae  | Irano-Turanian                   | Za, Ke     | Hemicryptophyte | YES |
| 2148 | <i>Pseudocamelina campylocarpa</i> (Boiss.) N. Busch                       | Brassicaceae  | Irano-Turanian                   | Za         | Hemicryptophyte | YES |
| 2149 | <i>Pseudocamelina glaucophylla</i> N. Busch                                | Brassicaceae  | Irano-Turanian                   | Al, Az, Za | Hemicryptophyte | NO  |
| 2150 | <i>Pseudocamelina szowitsii</i> (Boiss.) N. Busch                          | Brassicaceae  | Irano-Turanian                   | Az         | Hemicryptophyte | YES |
| 2151 | <i>Pseudocamelina violacea</i> (Boiss.) N. Busch                           | Brassicaceae  | Irano-Turanian                   | Za         | Chamaephyte     | YES |
| 2152 | <i>Pseudofortuynia esfandiarrii</i> Hedge                                  | Brassicaceae  | Irano-Turanian                   | Za         | Hemicryptophyte | YES |
| 2153 | <i>Pseudofortuynia leucoclada</i> (Boiss.) Khosravi                        | Brassicaceae  | Irano-Turanian                   | Za, Ke     | Hemicryptophyte | NO  |
| 2154 | <i>Pseudotrachydium kotschyi</i> (Boiss.) Pimenov & Kljuykov               | Apiaceae      | Irano-Turanian                   | Za         | Hemicryptophyte | NO  |
| 2155 | <i>Pseudotrachydium pauciradiatum</i> (Boiss. & Hohen.) Pimenov & Kljuykov | Apiaceae      | Irano-Turanian                   | Al         | Hemicryptophyte | NO  |
| 2156 | <i>Psychrogeton aellenii</i> (Rech.f.) Grierson                            | Asteraceae    | Irano-Turanian                   | Al, Ko     | Hemicryptophyte | YES |
| 2157 | <i>Psychrogeton chionophilus</i> (Boiss.) Krasch.                          | Asteraceae    | Irano-Turanian                   | Za         | Hemicryptophyte | YES |
| 2158 | <i>Psychrogeton persicus</i> (Boiss.) Grierson                             | Asteraceae    | Irano-Turanian                   | Za, Ke, Ko | Hemicryptophyte | NO  |
| 2159 | <i>Pterocephalus ghahremanii</i> Jamzad                                    | Dipsacaceae   | Irano-Turanian                   | Za         | Chamaephyte     | YES |
| 2160 | <i>Pterocephalus lignosus</i> Freyn & Bornm.                               | Dipsacaceae   | Irano-Turanian                   | Za         | Chamaephyte     | NO  |
| 2161 | <i>Pterocephalus melanobasis</i> Pau                                       | Dipsacaceae   | Irano-Turanian                   | Za         | Chamaephyte     | YES |
| 2162 | <i>Pterocephalus persicus</i> Boiss.                                       | Dipsacaceae   | Irano-Turanian                   | Za, Ke     | Chamaephyte     | NO  |
| 2163 | <i>Pterocephalus wendelboi</i> Rech.f.                                     | Dipsacaceae   | Irano-Turanian                   | Ke         | Chamaephyte     | YES |
| 2164 | <i>Pycnocycla acanthorhipsis</i> Rech.f., Aellen & Esfand.                 | Apiaceae      | Saharo-Sindian                   |            | Chamaephyte     | YES |
| 2165 | <i>Pycnocycla bashagardiana</i> Mozaff.                                    | Apiaceae      | Saharo-Sindian                   |            | Chamaephyte     | YES |
| 2166 | <i>Pycnocycla musiformis</i> Hedge & Lamond                                | Apiaceae      | Irano-Turanian                   |            | Chamaephyte     | YES |
| 2167 | <i>Pyrus ghahremanii</i> Attar & Zamani                                    | Rosaceae      | Euro-Siberian                    | Al         | Phanerophyte    | YES |
| 2168 | <i>Pyrus giffanica</i> Zamani & Attar                                      | Rosaceae      | Irano-Turanian                   | Ko         | Phanerophyte    | YES |
| 2169 | <i>Pyrus glabra</i> Boiss.                                                 | Rosaceae      | Irano-Turanian                   | Za         | Phanerophyte    | NO  |
| 2170 | <i>Pyrus kandevanica</i> Ghahr., Khat. & Mozaff.                           | Rosaceae      | Irano-Turanian,<br>Euro-Siberian | Al         | Phanerophyte    | YES |
| 2171 | <i>Pyrus longipedicellata</i> Zamani & Attar                               | Rosaceae      | Euro-Siberian                    | Al         | Phanerophyte    | YES |
| 2172 | <i>Pyrus mazanderanica</i> Schönb.-Tem.                                    | Rosaceae      | Irano-Turanian,<br>Euro-Siberian | Al         | Phanerophyte    | YES |
| 2173 | <i>Quercus brantii</i> Lindl.                                              | Fagaceae      | Irano-Turanian                   | Za         | Phanerophyte    | NO  |
| 2174 | <i>Ranunculus amblyolobus</i> Boiss. & Hohen.                              | Ranunculaceae | Irano-Turanian,                  | Az, Al     | Hemicryptophyte | NO  |

|      |                                                                 | Euro-Siberian |                |            |                 |     |
|------|-----------------------------------------------------------------|---------------|----------------|------------|-----------------|-----|
| 2175 | <i>Ranunculus aucheri</i> Boiss.                                | Ranunculaceae | Irano-Turanian | Za, Ke, Al | Hemicryptophyte | NO  |
| 2176 | <i>Ranunculus bulbiferus</i> Boiss. & Hohen.                    | Ranunculaceae | Irano-Turanian | Al         | Hemicryptophyte | YES |
| 2177 | <i>Ranunculus crymophilus</i> Boiss. & Hohen.                   | Ranunculaceae | Irano-Turanian | Az, Al, Za | Hemicryptophyte | NO  |
| 2178 | <i>Ranunculus dalechanensis</i> Iranshahr & Rech.f.             | Ranunculaceae | Irano-Turanian | Za         | Hemicryptophyte | YES |
| 2179 | <i>Ranunculus diversifolius</i> Boiss.& Kotschy                 | Ranunculaceae | Irano-Turanian | Az, Za     | Hemicryptophyte | YES |
| 2180 | <i>Ranunculus elbursensis</i> Boiss.                            | Ranunculaceae | Irano-Turanian | Al, Za     | Hemicryptophyte | NO  |
| 2181 | <i>Ranunculus elymaiticus</i> Boiss. & Hausskn.                 | Ranunculaceae | Irano-Turanian | Za         | Hemicryptophyte | NO  |
| 2182 | <i>Ranunculus eriorrhizus</i> Boiss. & Buhse                    | Ranunculaceae | Irano-Turanian | Ke         | Hemicryptophyte | NO  |
| 2183 | <i>Ranunculus farsicus</i> Rech.f.                              | Ranunculaceae | Irano-Turanian | Za         | Hemicryptophyte | YES |
| 2184 | <i>Ranunculus koeiei</i> Rech.f.                                | Ranunculaceae | Irano-Turanian |            | Hemicryptophyte | YES |
| 2185 | <i>Ranunculus microflorus</i> Pakravan                          | Ranunculaceae | Irano-Turanian | Za         | Hemicryptophyte | YES |
| 2186 | <i>Ranunculus papyrocarpus</i> Rech.f., Aellen & Esfand.        | Ranunculaceae | Irano-Turanian | Ke         | Hemicryptophyte | NO  |
| 2187 | <i>Ranunculus pichleri</i> Freyn ex Stapf                       | Ranunculaceae | Irano-Turanian | Za         | Hemicryptophyte | NO  |
| 2188 | <i>Ranunculus renzii</i> Iranshahr & Rech.f.                    | Ranunculaceae | Irano-Turanian | Az         | Hemicryptophyte | YES |
| 2189 | <i>Ranunculus sahendicus</i> Boiss. & Buhse                     | Ranunculaceae | Irano-Turanian | Az         | Hemicryptophyte | YES |
| 2190 | <i>Ranunculus sojakii</i> Iranshahr & Rech.f.                   | Ranunculaceae | Irano-Turanian | Al         | Hemicryptophyte | YES |
| 2191 | <i>Ranunculus straussii</i> Bornm.                              | Ranunculaceae | Irano-Turanian | Za         | Hemicryptophyte | YES |
| 2192 | <i>Ranunculus termei</i> Iranshahr & Rech.f.                    | Ranunculaceae | Irano-Turanian | Za         | Hemicryptophyte | YES |
| 2193 | <i>Ranunculus trichocarpus</i> Boiss. & Kotschy                 | Ranunculaceae | Irano-Turanian | Az, Al     | Hemicryptophyte | NO  |
| 2194 | <i>Ranunculus zenjanensis</i> Iranshahr & Rech.f.               | Ranunculaceae | Irano-Turanian | Az, Za     | Hemicryptophyte | YES |
| 2195 | <i>Reseda buhseana</i> Müll.Arg.                                | Resedaceae    | Irano-Turanian | Za, Ke     | Hemicryptophyte | NO  |
| 2196 | <i>Reseda bungei</i> Boiss.                                     | Resedaceae    | Irano-Turanian |            | Hemicryptophyte | NO  |
| 2197 | <i>Reseda macrobotrys</i> Boiss.                                | Resedaceae    | Irano-Turanian | Za, Ke     | Hemicryptophyte | NO  |
| 2198 | <i>Rhabdosciadium aucheri</i> Boiss.                            | Apiaceae      | Irano-Turanian | Za         | Hemicryptophyte | NO  |
| 2199 | <i>Rhabdosciadium petiolare</i> Boiss. & Hausskn.               | Apiaceae      | Irano-Turanian | Za, Al     | Hemicryptophyte | YES |
| 2200 | <i>Rhabdosciadium straussii</i> Hausskn. ex Bornm.              | Apiaceae      | Irano-Turanian | Za         | Hemicryptophyte | YES |
| 2201 | <i>Rhamnus cornifolia</i> Boiss. & Hohen.                       | Rhamnaceae    | Irano-Turanian | Az, Za     | Phanerophyte    | NO  |
| 2202 | <i>Rhaponticoides bachtiarica</i> (Boiss. & Hausskn.) L.Martins | Asteraceae    | Irano-Turanian | Za         | Hemicryptophyte | YES |
| 2203 | <i>Rhaponticum insigne</i> (Boiss.) Wagenitz                    | Asteraceae    | Irano-Turanian | Az         | Hemicryptophyte | NO  |
| 2204 | <i>Rheum austroiranicum</i> Taheri & Assadi                     | Polygonaceae  | Saharo-Sindian |            | Hemicryptophyte | YES |

|      |                                                         |                 |                |            |                 |     |
|------|---------------------------------------------------------|-----------------|----------------|------------|-----------------|-----|
| 2205 | <i>Rheum iranshahrii</i> Taheri & Assadi                | Polygonaceae    | Irano-Turanian |            | Hemicryptophyte | YES |
| 2206 | <i>Rheum kordestanicum</i> Taheri & Assadi              | Polygonaceae    | Irano-Turanian | Az, Za, Ko | Hemicryptophyte | NO  |
| 2207 | <i>Rheum neyshabourense</i> Baradaran & Jafari          | Polygonaceae    | Irano-Turanian | Ko         | Hemicryptophyte | YES |
| 2208 | <i>Rheum persicum</i> Losinsk.                          | Polygonaceae    | Irano-Turanian | Za         | Hemicryptophyte | YES |
| 2209 | <i>Rhopalosciadium stereocalyx</i> Rech.f.              | Apiaceae        | Irano-Turanian | Za         | Therophyte      | YES |
| 2210 | <i>Ribes khorasanicum</i> Saghafi & Assadi              | Grossulariaceae | Irano-Turanian | Ko         | Phanerophyte    | YES |
| 2211 | <i>Rindera bungei</i> Gürke                             | Boraginaceae    | Irano-Turanian | Al, Ko     | Hemicryptophyte | NO  |
| 2212 | <i>Rindera media</i> (Turrill) Riedl                    | Boraginaceae    | Irano-Turanian | Az         | Hemicryptophyte | YES |
| 2213 | <i>Rindera regia</i> Kusn.                              | Boraginaceae    | Irano-Turanian | Al         | Hemicryptophyte | YES |
| 2214 | <i>Rochelia mirheydari</i> Riedl & Esfand.              | Boraginaceae    | Irano-Turanian | Ko         | Therophyte      | NO  |
| 2215 | <i>Rochelia retrosepala</i> Khat.                       | Boraginaceae    | Irano-Turanian | Za         | Therophyte      | YES |
| 2216 | <i>Rorippa kurdica</i> (Boiss. & Hausskn.) Hedge        | Brassicaceae    | Irano-Turanian | Za         | Hemicryptophyte | YES |
| 2217 | <i>Rosa abrica</i> Khat. & Koobaz                       | Rosaceae        | Irano-Turanian | Za         | Phanerophyte    | YES |
| 2218 | <i>Rubia albicaulis</i> Boiss.                          | Rubiaceae       | Irano-Turanian | Za, Ke     | Chamaephyte     | NO  |
| 2219 | <i>Rubia caramanica</i> Bornm.                          | Rubiaceae       | Irano-Turanian | Ke         | Chamaephyte     | YES |
| 2220 | <i>Rubia pauciflora</i> Boiss.                          | Rubiaceae       | Irano-Turanian | Za         | Chamaephyte     | NO  |
| 2221 | <i>Rumex elbrusensis</i> Boiss.                         | Polygonaceae    | Irano-Turanian | Az, Za, Al | Hemicryptophyte | NO  |
| 2222 | <i>Rumex ephedroides</i> Bornm.                         | Polygonaceae    | Saharo-Sindian |            | Chamaephyte     | NO  |
| 2223 | <i>Rumex kandavanicus</i> (Rech.f.) Rech.f.             | Polygonaceae    | Irano-Turanian | Al         | Hemicryptophyte | YES |
| 2224 | <i>Salicornia iranica</i> Akhani                        | Chenopodiaceae  | Irano-Turanian | Al, Za     | Therophyte      | YES |
| 2225 | <i>Salicornia persica</i> Akhani                        | Chenopodiaceae  | Irano-Turanian | Al, Za     | Therophyte      | NO  |
| 2226 | <i>Salicornia persopolitana</i> Akhani                  | Chenopodiaceae  | Irano-Turanian | Za         | Therophyte      | YES |
| 2227 | <i>Salicornia sinus-persica</i> Akhani                  | Chenopodiaceae  | Saharo-Sindian |            | Therophyte      | NO  |
| 2228 | <i>Salix baladehensis</i> Maassoumi, Moeeni & Rahimin.  | Salicaceae      | Euro-Siberian  | Al         | Phanerophyte    | YES |
| 2229 | <i>Salix elymaitica</i> Maassoumi                       | Salicaceae      | Irano-Turanian | Za         | Phanerophyte    | YES |
| 2230 | <i>Salix firouzkuhensis</i> Maassoumi                   | Salicaceae      | Irano-Turanian | Al         | Phanerophyte    | YES |
| 2231 | <i>Salix issatissensis</i> Maassoumi, Moeeni & Rahimin. | Salicaceae      | Irano-Turanian | Za, Ke     | Phanerophyte    | NO  |
| 2232 | <i>Salix lacus-tari</i> Maassoumi & Kazempour           | Salicaceae      | Irano-Turanian | Al         | Phanerophyte    | YES |
| 2233 | <i>Salix viridiformis</i> Maassoumi                     | Salicaceae      | Irano-Turanian | Az         | Phanerophyte    | YES |
| 2234 | <i>Salsola abarghuensis</i> Assadi                      | Chenopodiaceae  | Irano-Turanian |            | Phanerophyte    | YES |
| 2235 | <i>Salsola austro-iranica</i> Akhani                    | Chenopodiaceae  | Saharo-Sindian |            | Therophyte      | YES |

|      |                                                     |                 |                                   |            |                 |     |
|------|-----------------------------------------------------|-----------------|-----------------------------------|------------|-----------------|-----|
| 2236 | <i>Salsola persica</i> Bunge ex Boiss.              | Chenopodiaceae  | Irano-Turanian                    | Az         | Chamaephyte     | NO  |
| 2237 | <i>Salsola yazdiana</i> Assadi                      | Chenopodiaceae  | Irano-Turanian                    | Ke, Lo     | Phanerophyte    | NO  |
| 2238 | <i>Salvia aristata</i> Aucher ex Benth.             | Lamiaceae       | Irano-Turanian                    | Al, Az, Za | Hemicryptophyte | NO  |
| 2239 | <i>Salvia bazmanica</i> Rech.f. & Esfand.           | Lamiaceae       | Saharo-Sindian                    |            | Chamaephyte     | NO  |
| 2240 | <i>Salvia chorassanica</i> Bunge                    | Lamiaceae       | Irano-Turanian                    | Ko         | Hemicryptophyte | NO  |
| 2241 | <i>Salvia eremophila</i> Boiss.                     | Lamiaceae       | Irano-Turanian                    | Za, Ke     | Chamaephyte     | NO  |
| 2242 | <i>Salvia hypochionaea</i> Boiss.                   | Lamiaceae       | Irano-Turanian                    | Az         | Hemicryptophyte | YES |
| 2243 | <i>Salvia hypoleuca</i> Benth.                      | Lamiaceae       | Irano-Turanian                    | Al         | Hemicryptophyte | NO  |
| 2244 | <i>Salvia jamzadii</i> Mozaff.                      | Lamiaceae       | Irano-Turanian                    | Za         | Hemicryptophyte | YES |
| 2245 | <i>Salvia kermanshahensis</i> Rech.f.               | Lamiaceae       | Irano-Turanian                    | Za         | Chamaephyte     | NO  |
| 2246 | <i>Salvia lachnocalyx</i> Hedge                     | Lamiaceae       | Irano-Turanian                    | Za         | Hemicryptophyte | YES |
| 2247 | <i>Salvia oligophylla</i> Aucher ex Benth.          | Lamiaceae       | Irano-Turanian,<br>Euro-Siberian  | Az, Al     | Hemicryptophyte | NO  |
| 2248 | <i>Salvia persepolitana</i> Boiss.                  | Lamiaceae       | Irano-Turanian,<br>Saharo-Sindian | Za, Lo     | Hemicryptophyte | NO  |
| 2249 | <i>Salvia sahendica</i> Boiss. & Buhse              | Lamiaceae       | Irano-Turanian                    | Az         | Hemicryptophyte | NO  |
| 2250 | <i>Salvia sclareopsis</i> Bornm. ex Hedge           | Lamiaceae       | Irano-Turanian                    | Az, Za     | Hemicryptophyte | NO  |
| 2251 | <i>Salvia shahkuhmahalei</i> Akhani                 | Lamiaceae       | Irano-Turanian                    | Al         | Chamaephyte     | YES |
| 2252 | <i>Salvia sharifii</i> Rech.f. & Esfand.            | Lamiaceae       | Irano-Turanian,<br>Saharo-Sindian |            | Hemicryptophyte | NO  |
| 2253 | <i>Salvia urmiensis</i> Bunge                       | Lamiaceae       | Irano-Turanian                    | Az, Al, Za | Hemicryptophyte | NO  |
| 2254 | <i>Salvia wendelboi</i> Hedge                       | Lamiaceae       | Irano-Turanian                    | Za         | Chamaephyte     | YES |
| 2255 | <i>Saponaria bodeana</i> Boiss.                     | Caryophyllaceae | Irano-Turanian                    | Al         | Hemicryptophyte | NO  |
| 2256 | <i>Saponaria esfandiarrii</i> Assadi                | Caryophyllaceae | Saharo-Sindian                    |            | Therophyte      | YES |
| 2257 | <i>Saponaria iranica</i> Dashti, Assadi & Sharifnia | Caryophyllaceae | Irano-Turanian                    | Ke         | Therophyte      | YES |
| 2258 | <i>Satureja atropatana</i> Bunge                    | Lamiaceae       | Irano-Turanian                    | Az         | Chamaephyte     | YES |
| 2259 | <i>Satureja avromanica</i> Maroofi                  | Lamiaceae       | Irano-Turanian                    | Za         | Chamaephyte     | YES |
| 2260 | <i>Satureja bachtiarica</i> Bunge                   | Lamiaceae       | Irano-Turanian                    | Za, Ke     | Chamaephyte     | NO  |
| 2261 | <i>Satureja edmondi</i> Briq.                       | Lamiaceae       | Irano-Turanian                    | Za         | Chamaephyte     | NO  |
| 2262 | <i>Satureja isophylla</i> Rech.f.                   | Lamiaceae       | Irano-Turanian                    | Al         | Chamaephyte     | NO  |
| 2263 | <i>Satureja kallarica</i> Jamzad                    | Lamiaceae       | Irano-Turanian                    | Za         | Chamaephyte     | YES |
| 2264 | <i>Satureja kermanshahensis</i> Jamzad              | Lamiaceae       | Saharo-Sindian                    |            | Chamaephyte     | YES |

|      |                                                              |               |                |                |                 |     |
|------|--------------------------------------------------------------|---------------|----------------|----------------|-----------------|-----|
| 2265 | <i>Satureja khuzistanica</i> Jamzad                          | Lamiaceae     | Saharo-Sindian |                | Chamaephyte     | YES |
| 2266 | <i>Satureja rechingeri</i> Jamzad                            | Lamiaceae     | Saharo-Sindian |                | Chamaephyte     | YES |
| 2267 | <i>Satureja sahendica</i> Bornm.                             | Lamiaceae     | Irano-Turanian | Al, Za         | Chamaephyte     | NO  |
| 2268 | <i>Saxifraga iranica</i> Bornm.                              | Saxifragaceae | Irano-Turanian | Al             | Chamaephyte     | YES |
| 2269 | <i>Saxifraga koelzii</i> Schönb.-Tem.                        | Saxifragaceae | Irano-Turanian | Al             | Chamaephyte     | YES |
| 2270 | <i>Saxifraga mazanderanica</i> Rech.f.                       | Saxifragaceae | Euro-Siberian  | Al             | Chamaephyte     | YES |
| 2271 | <i>Saxifraga ramsarica</i> Jamzad                            | Saxifragaceae | Irano-Turanian | Al             | Chamaephyte     | YES |
| 2272 | <i>Saxifraga wendelboi</i> Schönb.-Tem.                      | Saxifragaceae | Irano-Turanian | Al             | Chamaephyte     | YES |
| 2273 | <i>Scabiosa esfandiarii</i> Jamzad                           | Dipsacaceae   | Irano-Turanian | Za             | Therophyte      | YES |
| 2274 | <i>Scabiosa schimperiana</i> Boiss. & Buhse                  | Dipsacaceae   | Euro-Siberian  |                | Hemicryptophyte | YES |
| 2275 | <i>Scilla bisotunensis</i> Speta                             | Asparagaceae  | Irano-Turanian | Za             | Geophyte        | YES |
| 2276 | <i>Scilla gorganica</i> Speta                                | Asparagaceae  | Euro-Siberian  | Al             | Geophyte        | YES |
| 2277 | <i>Scilla greilhuberi</i> Speta                              | Asparagaceae  | Euro-Siberian  | Al             | Geophyte        | NO  |
| 2278 | <i>Scilla khorassanica</i> Meikle                            | Asparagaceae  | Irano-Turanian | Ko, Al         | Geophyte        | NO  |
| 2279 | <i>Sclerorchton haussknechtii</i> Boiss.                     | Apiaceae      | Irano-Turanian | Za             | Hemicryptophyte | YES |
| 2280 | <i>Sclerorhachis leptoclada</i> Rech.f.                      | Asteraceae    | Irano-Turanian |                | Hemicryptophyte | YES |
| 2281 | <i>Sclerorhachis platyrachis</i> (Boiss.) Podlech ex Rech.f. | Asteraceae    | Irano-Turanian | Ko, Lo         | Hemicryptophyte | NO  |
| 2282 | <i>Scorzonera calyculata</i> Boiss.                          | Asteraceae    | Irano-Turanian | Az, Al, Za     | Hemicryptophyte | NO  |
| 2283 | <i>Scorzonera flaccida</i> Rech.f.                           | Asteraceae    | Irano-Turanian | Za             | Geophyte        | YES |
| 2284 | <i>Scorzonera grossheimii</i> Lipsch. & Vassilcz.            | Asteraceae    | Irano-Turanian | Al, Za         | Hemicryptophyte | NO  |
| 2285 | <i>Scorzonera helodes</i> Rech.f.                            | Asteraceae    | Irano-Turanian | Za             | Geophyte        | YES |
| 2286 | <i>Scorzonera intricata</i> Boiss.                           | Asteraceae    | Irano-Turanian | Za, Ke, Bl     | Chamaephyte     | NO  |
| 2287 | <i>Scorzonera ispahanica</i> Boiss.                          | Asteraceae    | Irano-Turanian | Za             | Hemicryptophyte | NO  |
| 2288 | <i>Scorzonera joharchii</i> S.R.Safavi                       | Asteraceae    | Irano-Turanian |                | Geophyte        | YES |
| 2289 | <i>Scorzonera kandavanica</i> Rech.f.                        | Asteraceae    | Euro-Siberian  | Al             | Hemicryptophyte | YES |
| 2290 | <i>Scorzonera kirpicznikovii</i> Lipsch.                     | Asteraceae    | Euro-Siberian  | Al             | Hemicryptophyte | YES |
| 2291 | <i>Scorzonera limnophila</i> Boiss.                          | Asteraceae    | Irano-Turanian | Za             | Geophyte        | YES |
| 2292 | <i>Scorzonera luristanica</i> Rech.f.                        | Asteraceae    | Irano-Turanian | Al, Za         | Hemicryptophyte | NO  |
| 2293 | <i>Scorzonera microcalathia</i> (Rech.f.) Rech.f.            | Asteraceae    | Irano-Turanian | Ke, Ko, Lo     | Hemicryptophyte | NO  |
| 2294 | <i>Scorzonera mucida</i> Rech.f., Aellen & Esfand.           | Asteraceae    | Irano-Turanian | Al, Za, Ke, Ko | Geophyte        | NO  |
| 2295 | <i>Scorzonera nivalis</i> Boiss. & Hauskn. ex Boiss.         | Asteraceae    | Irano-Turanian | Za             | Hemicryptophyte | YES |

|      |                                                                       |                  |                                |                    |                 |     |
|------|-----------------------------------------------------------------------|------------------|--------------------------------|--------------------|-----------------|-----|
| 2296 | <i>Scorzonera persica</i> Boiss. & Buhse                              | Asteraceae       | Irano-Turanian                 | Al                 | Hemicryptophyte | YES |
| 2297 | <i>Scorzonera persepolitana</i> Boiss.                                | Asteraceae       | Irano-Turanian                 | Za                 | Hemicryptophyte | NO  |
| 2298 | <i>Scorzonera psychrophila</i> Boiss. & Hausskn. ex Boiss. & Hausskn. | Asteraceae       | Irano-Turanian                 | Za                 | Geophyte        | YES |
| 2299 | <i>Scorzonera renzii</i> Rech.f.                                      | Asteraceae       | Irano-Turanian                 | Az                 | Hemicryptophyte | NO  |
| 2300 | <i>Scorzonera rupicola</i> Hausskn.                                   | Asteraceae       | Irano-Turanian                 | Az, Za             | Chamaephyte     | NO  |
| 2301 | <i>Scorzonera stenocephala</i> Boiss.                                 | Asteraceae       | Irano-Turanian                 | Al, Za             | Geophyte        | NO  |
| 2302 | <i>Scorzonera subaphylla</i> Boiss.                                   | Asteraceae       | Irano-Turanian                 | Za                 | Hemicryptophyte | YES |
| 2303 | <i>Scorzonera wendelboi</i> Rech.f.                                   | Asteraceae       | Irano-Turanian                 | Al                 | Hemicryptophyte | YES |
| 2304 | <i>Scorzonera xylobasis</i> Rech.f.                                   | Asteraceae       | Irano-Turanian                 | Al                 | Hemicryptophyte | YES |
| 2305 | <i>Scrophularia alhagioides</i> Attar & Joharchi                      | Scrophulariaceae | Irano-Turanian                 |                    | Chamaephyte     | YES |
| 2306 | <i>Scrophularia atroglandulosa</i> Grau                               | Scrophulariaceae | Irano-Turanian                 | Az                 | Hemicryptophyte | YES |
| 2307 | <i>Scrophularia crassicaulis</i> Boiss.                               | Scrophulariaceae | Irano-Turanian                 | Al                 | Chamaephyte     | NO  |
| 2308 | <i>Scrophularia crassipedunculata</i> Attar & Joharchi                | Scrophulariaceae | Irano-Turanian                 | Ko                 | Chamaephyte     | YES |
| 2309 | <i>Scrophularia crassiuscula</i> Grau                                 | Scrophulariaceae | Irano-Turanian                 | Za                 | Hemicryptophyte | NO  |
| 2310 | <i>Scrophularia denaensis</i> Attar                                   | Scrophulariaceae | Irano-Turanian                 | Za                 | Chamaephyte     | YES |
| 2311 | <i>Scrophularia elbursensis</i> Bornm.                                | Scrophulariaceae | Irano-Turanian                 | Az, Za, Al         | Hemicryptophyte | NO  |
| 2312 | <i>Scrophularia elymaitica</i> Mozaff.                                | Scrophulariaceae | Saharo-Sindian                 |                    | Hemicryptophyte | YES |
| 2313 | <i>Scrophularia farinosa</i> Boiss.                                   | Scrophulariaceae | Irano-Turanian                 | Za                 | Hemicryptophyte | NO  |
| 2314 | <i>Scrophularia flava</i> Grau                                        | Scrophulariaceae | Irano-Turanian                 | Za                 | Hemicryptophyte | YES |
| 2315 | <i>Scrophularia frigida</i> Boiss.                                    | Scrophulariaceae | Irano-Turanian                 | Az, Al, Ko, Za, Ke | Chamaephyte     | NO  |
| 2316 | <i>Scrophularia gaubae</i> Bornm.                                     | Scrophulariaceae | Irano-Turanian, Saharo-Sindian | Al                 | Hemicryptophyte | NO  |
| 2317 | <i>Scrophularia ghahremanii</i> Attar & Hamzehee                      | Scrophulariaceae | Saharo-Sindian                 |                    | Hemicryptophyte | YES |
| 2318 | <i>Scrophularia glauca</i> Decne. ex Benth.                           | Scrophulariaceae | Irano-Turanian                 | Za                 | Hemicryptophyte | NO  |
| 2319 | <i>Scrophularia gorganica</i> Rech.f.                                 | Scrophulariaceae | Irano-Turanian                 | Al, Ko             | Hemicryptophyte | YES |
| 2320 | <i>Scrophularia iranica</i> Attar                                     | Scrophulariaceae | Irano-Turanian                 | Za                 | Hemicryptophyte | YES |
| 2321 | <i>Scrophularia ispanica</i> Attar & Nowrouzi                         | Scrophulariaceae | Irano-Turanian                 | Za                 | Hemicryptophyte | YES |
| 2322 | <i>Scrophularia kermanica</i> Ghahr. & Mirtadz.                       | Scrophulariaceae | Irano-Turanian                 | Ke                 | Hemicryptophyte | YES |
| 2323 | <i>Scrophularia khorassanica</i> Attar & Joharchi                     | Scrophulariaceae | Irano-Turanian                 | Ko                 | Hemicryptophyte | YES |
| 2324 | <i>Scrophularia megalantha</i> Rech.f.                                | Scrophulariaceae | Euro-Siberian                  | Al                 | Hemicryptophyte | NO  |
| 2325 | <i>Scrophularia oxysepala</i> Boiss.                                  | Scrophulariaceae | Irano-Turanian                 | Az                 | Hemicryptophyte | YES |

|      |                                                        |                  |                                  |                |                 |     |
|------|--------------------------------------------------------|------------------|----------------------------------|----------------|-----------------|-----|
| 2326 | <i>Scrophularia papyracea</i> Attar                    | Scrophulariaceae | Irano-Turanian                   | Za             | Chamaephyte     | YES |
| 2327 | <i>Scrophularia rechingeri</i> Grau                    | Scrophulariaceae | Irano-Turanian                   | Az             | Hemicryptophyte | YES |
| 2328 | <i>Scrophularia rostrata</i> Boiss. & Buhse            | Scrophulariaceae | Irano-Turanian,<br>Euro-Siberian | Al, Az         | Hemicryptophyte | NO  |
| 2329 | <i>Scrophularia schiraziana</i> Attar & Hatami         | Scrophulariaceae | Irano-Turanian                   | Za             | Hemicryptophyte | YES |
| 2330 | <i>Scrophularia shulabadensis</i> Attar & Hamzehee     | Scrophulariaceae | Irano-Turanian                   | Za             | Hemicryptophyte | YES |
| 2331 | <i>Scrophularia subaphylla</i> Boiss.                  | Scrophulariaceae | Irano-Turanian                   | Az, Za, Ke, Al | Hemicryptophyte | NO  |
| 2332 | <i>Scrophularia tortuosissima</i> Attar & Joharchi     | Scrophulariaceae | Irano-Turanian                   | Ko             | Hemicryptophyte | YES |
| 2333 | <i>Scrophularia valida</i> Grau                        | Scrophulariaceae | Irano-Turanian                   | Ko             | Hemicryptophyte | YES |
| 2334 | <i>Scrophularia xylobasis</i> Rech.f.                  | Scrophulariaceae | Irano-Turanian                   | Za             | Hemicryptophyte | YES |
| 2335 | <i>Scutellaria bornmuelleri</i> Hauskn. ex Bornm.      | Lamiaceae        | Irano-Turanian                   | Az             | Chamaephyte     | NO  |
| 2336 | <i>Scutellaria farsistanica</i> Rech.f.                | Lamiaceae        | Irano-Turanian                   | Za             | Chamaephyte     | NO  |
| 2337 | <i>Scutellaria fragillima</i> Rech.f.                  | Lamiaceae        | Irano-Turanian                   | Za             | Chamaephyte     | YES |
| 2338 | <i>Scutellaria glechomoides</i> Boiss.                 | Lamiaceae        | Irano-Turanian                   | Al, Za         | Chamaephyte     | NO  |
| 2339 | <i>Scutellaria multicaulis</i> Boiss.                  | Lamiaceae        | Irano-Turanian                   | Az, Za, Ke     | Chamaephyte     | NO  |
| 2340 | <i>Scutellaria nepetifolia</i> Benth.                  | Lamiaceae        | Irano-Turanian                   | Az, Za, Al     | Chamaephyte     | NO  |
| 2341 | <i>Scutellaria persica</i> Bornm.                      | Lamiaceae        | Irano-Turanian                   | Za             | Chamaephyte     | NO  |
| 2342 | <i>Scutellaria pinnatifida</i> A.Ham.                  | Lamiaceae        | Irano-Turanian                   | Az, Za, Al, Ko | Chamaephyte     | NO  |
| 2343 | <i>Scutellaria ramazanica</i> Parsa                    | Lamiaceae        | Irano-Turanian                   | Az             | Chamaephyte     | YES |
| 2344 | <i>Scutellaria szovitziana</i> Bunge                   | Lamiaceae        | Irano-Turanian                   | Az             | Chamaephyte     | YES |
| 2345 | <i>Scutellaria theobromina</i> Rech.f.                 | Lamiaceae        | Irano-Turanian                   | Az             | Chamaephyte     | NO  |
| 2346 | <i>Scutellaria xylorrhiza</i> Bornm.                   | Lamiaceae        | Irano-Turanian                   | Za             | Chamaephyte     | YES |
| 2347 | <i>Secale ciliatiglume</i> (Boiss.) Grossh.            | Poaceae          | Irano-Turanian                   | Za             | Hemicryptophyte | YES |
| 2348 | <i>Sedum callichroum</i> Boiss.                        | Crassulaceae     | Irano-Turanian                   | Za             | Therophyte      | YES |
| 2349 | <i>Sedum elburzense</i> Akhiani & Assadi               | Crassulaceae     | Irano-Turanian                   | Az, Al         | Therophyte      | YES |
| 2350 | <i>Sedum kotschyannum</i> Boiss.                       | Crassulaceae     | Irano-Turanian                   | Za, Ke         | Therophyte      | NO  |
| 2351 | <i>Semenovia dichotoma</i> (Boiss.) Manden.            | Apiaceae         | Irano-Turanian                   | Za             | Hemicryptophyte | NO  |
| 2352 | <i>Semenovia frigida</i> (Boiss. & Hauskn.) Manden.    | Apiaceae         | Irano-Turanian                   | Za, Ke         | Hemicryptophyte | NO  |
| 2353 | <i>Semenovia subscaposa</i> (Rech.f.) Alava            | Apiaceae         | Irano-Turanian                   | Al, Ko         | Chamaephyte     | NO  |
| 2354 | <i>Semenovia suffruticosa</i> (Freyn & Bornm.) Manden. | Apiaceae         | Irano-Turanian                   | Ke, Lo         | Chamaephyte     | YES |
| 2355 | <i>Semenovia tragoides</i> (Boiss.) Manden.            | Apiaceae         | Irano-Turanian                   | Az, Za, Al, Ko | Hemicryptophyte | NO  |

|      |                                                            |                 |                |                 |                 |     |
|------|------------------------------------------------------------|-----------------|----------------|-----------------|-----------------|-----|
| 2356 | <i>Sempervivum atropatanum</i> J.Parn.                     | Crassulaceae    | Irano-Turanian | Az              | Chamaephyte     | YES |
| 2357 | <i>Sempervivum iranicum</i> Bornm. & Gauba                 | Crassulaceae    | Irano-Turanian | Az, Al          | Chamaephyte     | NO  |
| 2358 | <i>Senecio eligulatus</i> B.Nord., Moussavi & Djavadi      | Asteraceae      | Irano-Turanian | Ke              | Therophyte      | YES |
| 2359 | <i>Senecio iranicus</i> B.Nord.                            | Asteraceae      | Irano-Turanian | Al              | Therophyte      | YES |
| 2360 | <i>Senecio joharchii</i> F.Ghahrem., Ezazi, Rahch. & Attar | Asteraceae      | Irano-Turanian | Ko              | Hemicryptophyte | YES |
| 2361 | <i>Senecio kotschyanus</i> Boiss.                          | Asteraceae      | Irano-Turanian | Za              | Therophyte      | YES |
| 2362 | <i>Senecio lipskyi</i> Lomakin                             | Asteraceae      | Irano-Turanian | Az              | Hemicryptophyte | YES |
| 2363 | <i>Senecio subnivalis</i> Ajani, Noroozi & Nord.           | Asteraceae      | Irano-Turanian | Ke              | Therophyte      | YES |
| 2364 | <i>Senecio vulcanicus</i> Boiss.                           | Asteraceae      | Irano-Turanian | Al              | Hemicryptophyte | NO  |
| 2365 | <i>Serratula bachtiarica</i> Boiss. & Hausskn. ex Boiss.   | Asteraceae      | Irano-Turanian | Za              | Hemicryptophyte | YES |
| 2366 | <i>Serratula calcarea</i> Mozaff.                          | Asteraceae      | Irano-Turanian | Az              | Hemicryptophyte | YES |
| 2367 | <i>Serratula gracillima</i> Rech.f.                        | Asteraceae      | Irano-Turanian | Al              | Hemicryptophyte | YES |
| 2368 | <i>Serratula grandifolia</i> P.H.Davis                     | Asteraceae      | Irano-Turanian | Za              | Hemicryptophyte | YES |
| 2369 | <i>Serratula haussknechtii</i> Boiss.                      | Asteraceae      | Irano-Turanian | Al, Za          | Hemicryptophyte | NO  |
| 2370 | <i>Serratula melanocheila</i> Boiss. & Hausskn. ex Boiss.  | Asteraceae      | Irano-Turanian | Za              | Hemicryptophyte | YES |
| 2371 | <i>Serratula suffulta</i> Rech.f.                          | Asteraceae      | Irano-Turanian | Za              | Hemicryptophyte | YES |
| 2372 | <i>Serratula viciifolia</i> Boiss. & Hausskn.              | Asteraceae      | Irano-Turanian | Az, Za          | Hemicryptophyte | YES |
| 2373 | <i>Silene albescens</i> Boiss.                             | Caryophyllaceae | Irano-Turanian | Za              | Chamaephyte     | NO  |
| 2374 | <i>Silene avromana</i> Boiss. & Hausskn.                   | Caryophyllaceae | Irano-Turanian | Az, Za, Al, Ko  | Chamaephyte     | NO  |
| 2375 | <i>Silene caroli-henrici</i> Melzh.                        | Caryophyllaceae | Irano-Turanian | Za              | Hemicryptophyte | YES |
| 2376 | <i>Silene daenensis</i> Melzh.                             | Caryophyllaceae | Irano-Turanian | Za, Ke          | Hemicryptophyte | YES |
| 2377 | <i>Silene demawendica</i> Bornm.                           | Caryophyllaceae | Irano-Turanian | Al              | Hemicryptophyte | YES |
| 2378 | <i>Silene dschuparensis</i> Bornm.                         | Caryophyllaceae | Irano-Turanian | Ke              | Chamaephyte     | YES |
| 2379 | <i>Silene elymaitica</i> Bornm.                            | Caryophyllaceae | Irano-Turanian | Za              | Chamaephyte     | NO  |
| 2380 | <i>Silene erysimifolia</i> Stapf                           | Caryophyllaceae | Irano-Turanian | Az, Za, Al      | Chamaephyte     | NO  |
| 2381 | <i>Silene farsistanica</i> Melzh.                          | Caryophyllaceae | Irano-Turanian | Za              | Chamaephyte     | NO  |
| 2382 | <i>Silene ferdowsii</i> Joharchi, Nejati & F.Ghahrem.      | Caryophyllaceae | Irano-Turanian | Ko              | Chamaephyte     | YES |
| 2383 | <i>Silene gaubae</i> Bornm. & Gauba                        | Caryophyllaceae | Irano-Turanian | Al              | Chamaephyte     | YES |
| 2384 | <i>Silene gertraudiae</i> Melzh.                           | Caryophyllaceae | Irano-Turanian | Ko, Za          | Chamaephyte     | NO  |
| 2385 | <i>Silene goniocaula</i> Boiss.                            | Caryophyllaceae | Irano-Turanian | Az, Za          | Hemicryptophyte | NO  |
| 2386 | <i>Silene gynodioica</i> Ghaz.                             | Caryophyllaceae | Irano-Turanian | Az, Za, Al, Ke, | Chamaephyte     | NO  |



|      |                                                         |                 |                |        |                 |     |
|------|---------------------------------------------------------|-----------------|----------------|--------|-----------------|-----|
|      |                                                         |                 |                | Ko     |                 |     |
| 2387 | <i>Silene hirticalyx</i> Boiss. & Hausskn.              | Caryophyllaceae | Irano-Turanian | Za     | Chamaephyte     | YES |
| 2388 | <i>Silene lineata</i> Boiss. & Buhse                    | Caryophyllaceae | Irano-Turanian |        | Chamaephyte     | YES |
| 2389 | <i>Silene lucida</i> Chowdhuri                          | Caryophyllaceae | Irano-Turanian | Az     | Hemicryptophyte | YES |
| 2390 | <i>Silene meyeri</i> Fenzl ex Boiss. & Buhse            | Caryophyllaceae | Irano-Turanian | Az, Al | Hemicryptophyte | NO  |
| 2391 | <i>Silene mishudaghensis</i> Gholipour & Parsa Khanghah | Caryophyllaceae | Irano-Turanian | Za     | Hemicryptophyte | YES |
| 2392 | <i>Silene nizvana</i> Melzh.                            | Caryophyllaceae | Irano-Turanian | Al     | Chamaephyte     | YES |
| 2393 | <i>Silene nurensis</i> Boiss. & Hausskn.                | Caryophyllaceae | Irano-Turanian | Za, Ke | Hemicryptophyte | NO  |
| 2394 | <i>Silene oligophylla</i> Melzh.                        | Caryophyllaceae | Irano-Turanian | Az     | Chamaephyte     | YES |
| 2395 | <i>Silene palinotricha</i> Fenzl ex Boiss.              | Caryophyllaceae | Irano-Turanian | Al     | Chamaephyte     | YES |
| 2396 | <i>Silene parrowiana</i> Boiss. & Hausskn.              | Caryophyllaceae | Irano-Turanian | Za     | Chamaephyte     | YES |
| 2397 | <i>Silene persepolitana</i> Melzh.                      | Caryophyllaceae | Irano-Turanian | Za     | Hemicryptophyte | YES |
| 2398 | <i>Silene persica</i> Boiss.                            | Caryophyllaceae | Irano-Turanian | Za     | Hemicryptophyte | NO  |
| 2399 | <i>Silene pravitziana</i> Rech.f.                       | Caryophyllaceae | Irano-Turanian | Za     | Chamaephyte     | YES |
| 2400 | <i>Silene pseudaucheriana</i> Melzh.                    | Caryophyllaceae | Irano-Turanian | Az, Za | Chamaephyte     | YES |
| 2401 | <i>Silene pseudonurensis</i> Melzh.                     | Caryophyllaceae | Irano-Turanian | Za     | Chamaephyte     | YES |
| 2402 | <i>Silene rasvandica</i> Melzh.                         | Caryophyllaceae | Irano-Turanian | Za     | Chamaephyte     | YES |
| 2403 | <i>Silene renzii</i> Melzh.                             | Caryophyllaceae | Irano-Turanian |        | Chamaephyte     | YES |
| 2404 | <i>Silene sciaphila</i> Melzh. & Rech.f.                | Caryophyllaceae | Saharo-Sindian | Za     | Chamaephyte     | YES |
| 2405 | <i>Silene shahrudensis</i> Rech.f.                      | Caryophyllaceae | Irano-Turanian | Al     | Chamaephyte     | YES |
| 2406 | <i>Silene sojakii</i> Melzh.                            | Caryophyllaceae | Irano-Turanian | Al     | Chamaephyte     | YES |
| 2407 | <i>Silene stapfii</i> Melzh.                            | Caryophyllaceae | Irano-Turanian | Ke     | Hemicryptophyte | YES |
| 2408 | <i>Silene tragacantha</i> Fenzl ex Boiss.               | Caryophyllaceae | Irano-Turanian | Za     | Chamaephyte     | YES |
| 2409 | <i>Sisymbrium gaubae</i> Rech. f. & Bormm.              | Brassicaceae    | Irano-Turanian | Al     | Hemicryptophyte | YES |
| 2410 | <i>Sisymbrium kermanicum</i> Khodash. & Mirtadz.        | Brassicaceae    | Irano-Turanian | Ke     | Therophyte      | YES |
| 2411 | <i>Solenanthus bakhtiaricus</i> Khat.                   | Boraginaceae    | Irano-Turanian | Za     | Hemicryptophyte | YES |
| 2412 | <i>Sorbus luristanica</i> (Bormm.) Schönb.-Tem.         | Rosaceae        | Irano-Turanian | Za     | Phanerophyte    | YES |
| 2413 | <i>Sorbus tiliifolia</i> H.Zare, Amini & Assadi         | Rosaceae        | Irano-Turanian | Al     | Phanerophyte    | YES |
| 2414 | <i>Spiraea sheikhii</i> H.Zare                          | Rosaceae        | Euro-Siberian  |        | Phanerophyte    | YES |
| 2415 | <i>Stachys acerosa</i> Boiss.                           | Lamiaceae       | Irano-Turanian | Za, Ke | Chamaephyte     | NO  |
| 2416 | <i>Stachys asterocalyx</i> Rech.f.                      | Lamiaceae       | Irano-Turanian | Za, Ke | Chamaephyte     | NO  |

|      |                                                         |                 |                                  |            |                 |     |
|------|---------------------------------------------------------|-----------------|----------------------------------|------------|-----------------|-----|
| 2417 | <i>Stachys aucheri</i> Benth.                           | Lamiaceae       | Irano-Turanian                   | Za         | Chamaephyte     | NO  |
| 2418 | <i>Stachys ixodes</i> Boiss. & Hausskn.                 | Lamiaceae       | Irano-Turanian                   | Za         | Chamaephyte     | NO  |
| 2419 | <i>Stachys kermanshahensis</i> Rech.f.                  | Lamiaceae       | Irano-Turanian                   | Za         | Chamaephyte     | NO  |
| 2420 | <i>Stachys koelzii</i> Rech.f.                          | Lamiaceae       | Irano-Turanian                   | Za         | Chamaephyte     | YES |
| 2421 | <i>Stachys lanigera</i> (Bomm.) Rech.f.                 | Lamiaceae       | Irano-Turanian                   | Az, Za     | Hemicryptophyte | YES |
| 2422 | <i>Stachys laxa</i> Boiss. & Buhse                      | Lamiaceae       | Irano-Turanian,<br>Euro-Siberian | Al         | Chamaephyte     | NO  |
| 2423 | <i>Stachys lurestanica</i> Jamzad                       | Lamiaceae       | Irano-Turanian                   | Za         | Chamaephyte     | YES |
| 2424 | <i>Stachys obtusicrena</i> Boiss.                       | Lamiaceae       | Irano-Turanian                   | Za, Ke     | Chamaephyte     | NO  |
| 2425 | <i>Stachys persepolitana</i> Boiss.                     | Lamiaceae       | Irano-Turanian                   | Za, Ke     | Therophyte      | NO  |
| 2426 | <i>Stachys pilifera</i> Benth.                          | Lamiaceae       | Irano-Turanian                   | Za         | Chamaephyte     | NO  |
| 2427 | <i>Stachys subaphylla</i> Rech.f.                       | Lamiaceae       | Irano-Turanian,<br>Euro-Siberian | Al         | Chamaephyte     | YES |
| 2428 | <i>Stachys veroniciformis</i> Rech.f.                   | Lamiaceae       | Irano-Turanian                   | Za         | Chamaephyte     | NO  |
| 2429 | <i>Stellaria scaturiginella</i> Rech.f.                 | Caryophyllaceae | Irano-Turanian                   | Al         | Therophyte      | YES |
| 2430 | <i>Stelleropsis iranica</i> Pobed.                      | Thymelaeaceae   | Irano-Turanian                   | Al, Ko     | Chamaephyte     | YES |
| 2431 | <i>Stenotaenia elbursensis</i> Bornm.                   | Apiaceae        | Irano-Turanian                   | Al         | Hemicryptophyte | YES |
| 2432 | <i>Stenotaenia haussknechtii</i> Boiss.                 | Apiaceae        | Irano-Turanian                   | Za         | Hemicryptophyte | YES |
| 2433 | <i>Stenotaenia nudicaulis</i> Boiss.                    | Apiaceae        | Irano-Turanian                   | Az, Al     | Hemicryptophyte | NO  |
| 2434 | <i>Sterigmostemum longistylum</i> (Boiss.) Kuntze       | Brassicaceae    | Irano-Turanian                   | Al, Za, Ke | Therophyte      | NO  |
| 2435 | <i>Stipa atriseta</i> Stapf ex Bor                      | Poaceae         | Irano-Turanian                   | Za         | Hemicryptophyte | NO  |
| 2436 | <i>Stipa gaubae</i> Bor                                 | Poaceae         | Irano-Turanian                   | Al         | Hemicryptophyte | YES |
| 2437 | <i>Stipa haussknechtii</i> Boiss.                       | Poaceae         | Irano-Turanian                   | Za, Ke     | Hemicryptophyte | NO  |
| 2438 | <i>Straussiella purpurea</i> (Bunge ex Boiss.) Hausskn. | Brassicaceae    | Irano-Turanian                   | Za         | Chamaephyte     | NO  |
| 2439 | <i>Stroganowia persica</i> N.Busch                      | Brassicaceae    | Irano-Turanian                   | Za         | Hemicryptophyte | YES |
| 2440 | <i>Suaeda iranshahrii</i> Akhani & Freitag              | Chenopodiaceae  | Saharo-Sindian                   |            | Therophyte      | YES |
| 2441 | <i>Suaeda khali Jefarsica</i> Akhani                    | Chenopodiaceae  | Saharo-Sindian                   |            | Therophyte      | YES |
| 2442 | <i>Tamarix serotina</i> Bunge ex Boiss.                 | Tamaricaceae    | Irano-Turanian                   | Al, Lo     | Phanerophyte    | YES |
| 2443 | <i>Tanacetum archibaldii</i> Podlech                    | Asteraceae      | Irano-Turanian                   | Al         | Chamaephyte     | YES |
| 2444 | <i>Tanacetum bachtiaricum</i> Mozaff.                   | Asteraceae      | Irano-Turanian                   | Za         | Chamaephyte     | YES |
| 2445 | <i>Tanacetum budjnurdense</i> (Rech.f.) Tzvelev         | Asteraceae      | Irano-Turanian                   |            | Hemicryptophyte | YES |
| 2446 | <i>Tanacetum dumosum</i> Boiss.                         | Asteraceae      | Irano-Turanian                   | Za         | Chamaephyte     | NO  |

|      |                                          |            |                |                       |                 |     |
|------|------------------------------------------|------------|----------------|-----------------------|-----------------|-----|
| 2447 | Tanacetum elbursense Mozaff.             | Asteraceae | Irano-Turanian | Al                    | Chamaephyte     | YES |
| 2448 | Tanacetum hololeucum (Bornm.) Podlech    | Asteraceae | Irano-Turanian | Al                    | Chamaephyte     | NO  |
| 2449 | Tanacetum joharchii Sonboli & Kaz.Osaloo | Asteraceae | Irano-Turanian | Ko                    | Chamaephyte     | YES |
| 2450 | Tanacetum khorassanicum (Krasch.) Parsa  | Asteraceae | Irano-Turanian | Ko                    | Chamaephyte     | NO  |
| 2451 | Tanacetum lingulatum (Boiss.) Bornm.     | Asteraceae | Irano-Turanian | Al, Za, Ke            | Chamaephyte     | NO  |
| 2452 | Tanacetum paradoxum Bornm.               | Asteraceae | Irano-Turanian | Za                    | Chamaephyte     | YES |
| 2453 | Tanacetum persicum (Boiss.) Mozaff.      | Asteraceae | Irano-Turanian | Az, Za, Ke,<br>Ko, Al | Chamaephyte     | NO  |
| 2454 | Tanacetum salsugineum Podlech            | Asteraceae | Irano-Turanian | Az                    | Chamaephyte     | YES |
| 2455 | Tanacetum sonbolii Mozaff.               | Asteraceae | Irano-Turanian | Az                    | Chamaephyte     | YES |
| 2456 | Tanacetum stapfianum (Rech.f.) Podlech   | Asteraceae | Irano-Turanian | Za                    | Chamaephyte     | YES |
| 2457 | Tanacetum tarighii Sonboli               | Asteraceae | Irano-Turanian | Az                    | Chamaephyte     | YES |
| 2458 | Tanacetum tenuisectum (Boiss.) Podlech   | Asteraceae | Irano-Turanian | Al                    | Chamaephyte     | NO  |
| 2459 | Tanacetum trifoliolatum Podlech          | Asteraceae | Irano-Turanian | Az                    | Hemicryptophyte | YES |
| 2460 | Tanacetum turcomanicum (Krasch.) Tzvelev | Asteraceae | Irano-Turanian | Ko                    | Chamaephyte     | YES |
| 2461 | Tanacetum walteri (C.Winkl.) Tzvelev     | Asteraceae | Irano-Turanian | Ko                    | Chamaephyte     | YES |
| 2462 | Taraxacum azerbaijanicum Soest           | Asteraceae | Irano-Turanian | Az, Al                | Hemicryptophyte | NO  |
| 2463 | Taraxacum baluchistanicum Soest          | Asteraceae | Saharo-Sindian |                       | Hemicryptophyte | YES |
| 2464 | Taraxacum darbandense Soest              | Asteraceae | Irano-Turanian | Al                    | Hemicryptophyte | YES |
| 2465 | Taraxacum hepaticolor Soest              | Asteraceae | Irano-Turanian | Za                    | Hemicryptophyte | YES |
| 2466 | Taraxacum hydrophilum Soest              | Asteraceae | Irano-Turanian | Ko                    | Hemicryptophyte | YES |
| 2467 | Taraxacum iranicum Soest                 | Asteraceae | Irano-Turanian | Al, Az, Ko            | Hemicryptophyte | NO  |
| 2468 | Taraxacum kalchanicum Soest              | Asteraceae | Irano-Turanian | Az                    | Hemicryptophyte | YES |
| 2469 | Taraxacum koelzii Soest                  | Asteraceae | Irano-Turanian | Az, Al                | Hemicryptophyte | YES |
| 2470 | Taraxacum kotschyi Soest                 | Asteraceae | Irano-Turanian | Za                    | Hemicryptophyte | YES |
| 2471 | Taraxacum leonardii Soest                | Asteraceae | Irano-Turanian | Ko                    | Hemicryptophyte | YES |
| 2472 | Taraxacum neospurium Soest               | Asteraceae | Irano-Turanian | Al, Za                | Hemicryptophyte | YES |
| 2473 | Taraxacum plicatum Soest                 | Asteraceae | Irano-Turanian | Za                    | Hemicryptophyte | YES |
| 2474 | Taraxacum primigenium Hand.-Mazz.        | Asteraceae | Irano-Turanian | Az, Ke                | Hemicryptophyte | YES |
| 2475 | Taraxacum rechingeri Soest               | Asteraceae | Irano-Turanian | Al, Za                | Hemicryptophyte | NO  |
| 2476 | Taraxacum roseum Bornm.                  | Asteraceae | Irano-Turanian | Al, Za, Ko, Ke        | Hemicryptophyte | NO  |

|      |                                                           |                 |                |                |                 |     |
|------|-----------------------------------------------------------|-----------------|----------------|----------------|-----------------|-----|
| 2477 | <i>Taraxacum ruberuliforme</i> Soest                      | Asteraceae      | Irano-Turanian | Az, Al         | Hemicryptophyte | YES |
| 2478 | <i>Taraxacum subcorniculatum</i> Gilli                    | Asteraceae      | Irano-Turanian | Az             | Hemicryptophyte | YES |
| 2479 | <i>Taraxacum vagum</i> Soest                              | Asteraceae      | Irano-Turanian | Al             | Hemicryptophyte | YES |
| 2480 | <i>Taverniera echinata</i> Mozaff.                        | Fabaceae        | Saharo-Sindian |                | Chamaephyte     | YES |
| 2481 | <i>Telephium eriglaucum</i> F.N.Williams                  | Caryophyllaceae | Irano-Turanian | Za, Ke         | Chamaephyte     | NO  |
| 2482 | <i>Tetrataenium lasiopetalum</i> (Boiss.) Manden.         | Apiaceae        | Irano-Turanian | Az, Za         | Hemicryptophyte | NO  |
| 2483 | <i>Tetrataenium nephrophyllum</i> (Leute) Manden.         | Apiaceae        | Irano-Turanian | Za             | Hemicryptophyte | YES |
| 2484 | <i>Teucrium macrum</i> Boiss. & Hauskn.                   | Lamiaceae       | Irano-Turanian | Za             | Chamaephyte     | YES |
| 2485 | <i>Teucrium persicum</i> Boiss.                           | Lamiaceae       | Saharo-Sindian |                | Chamaephyte     | NO  |
| 2486 | <i>Thalictrum mazandaranicum</i> Pakravan & Assadi        | Ranunculaceae   | Irano-Turanian | Al             | Hemicryptophyte | YES |
| 2487 | <i>Thalictrum tacabicum</i> Pakravan & Assadi             | Ranunculaceae   | Irano-Turanian | Az             | Hemicryptophyte | YES |
| 2488 | <i>Theocarpus meifolius</i> Boiss.                        | Apiaceae        | Irano-Turanian | Za, Ke         | Hemicryptophyte | NO  |
| 2489 | <i>Thlaspi inhumile</i> Ponert                            | Brassicaceae    | Irano-Turanian | Al             | Hemicryptophyte | YES |
| 2490 | <i>Thlaspi kurdicum</i> Hedge                             | Brassicaceae    | Irano-Turanian | Az             | Hemicryptophyte | YES |
| 2491 | <i>Thlaspi maassoumii</i> Mozaff.                         | Brassicaceae    | Irano-Turanian | Al             | Hemicryptophyte | YES |
| 2492 | <i>Thlaspi pulvinata</i> Mozaff.                          | Brassicaceae    | Irano-Turanian | Az, Ke         | Hemicryptophyte | YES |
| 2493 | <i>Thlaspi stenocarpum</i> (Boiss.) Hedge                 | Brassicaceae    | Irano-Turanian | Al             | Hemicryptophyte | NO  |
| 2494 | <i>Thlaspi tenue</i> (Boiss. & Buhse) Hedge               | Brassicaceae    | Irano-Turanian | Az             | Hemicryptophyte | YES |
| 2495 | <i>Thymus carmanicus</i> Jalas                            | Lamiaceae       | Irano-Turanian | Az, Al, Za, Ke | Hemicryptophyte | NO  |
| 2496 | <i>Thymus daenensis</i> Celak.                            | Lamiaceae       | Irano-Turanian | Az, Za, Al, Ke | Chamaephyte     | NO  |
| 2497 | <i>Thymus marandensis</i> Jamzad                          | Lamiaceae       | Irano-Turanian | Az             | Chamaephyte     | YES |
| 2498 | <i>Thymus persicus</i> (Ronniger ex Rech.f.) Jalas        | Lamiaceae       | Irano-Turanian | Az             | Chamaephyte     | YES |
| 2499 | <i>Thymus pubescens</i> Boiss. & Kotschy ex Celak.        | Lamiaceae       | Irano-Turanian | Az, Al, Za, Ko | Hemicryptophyte | NO  |
| 2500 | <i>Tilia sabetii</i> H.Zare                               | Tiliaceae       | Euro-Siberian  | Al             | Phanerophyte    | YES |
| 2501 | <i>Tilia stellatopilosa</i> H.Zare, Amini & Assadi        | Tiliaceae       | Euro-Siberian  | Al             | Phanerophyte    | YES |
| 2502 | <i>Trachydium depressum</i> Boiss.                        | Apiaceae        | Irano-Turanian | Az, Za, Al, Ke | Hemicryptophyte | NO  |
| 2503 | <i>Trachydium eriocarpum</i> Bornm. & Gauba               | Apiaceae        | Irano-Turanian | Al             | Hemicryptophyte | YES |
| 2504 | <i>Trachydium kotschyi</i> Boiss.                         | Apiaceae        | Irano-Turanian | Za             | Hemicryptophyte | NO  |
| 2505 | <i>Trachydium pauciradiatum</i> (Boiss. & Hohen.) Rech.f. | Apiaceae        | Irano-Turanian | Al             | Hemicryptophyte | NO  |
| 2506 | <i>Tragopogon acanthocarpus</i> Boiss.                    | Asteraceae      | Irano-Turanian | Al, Za, Az     | Hemicryptophyte | NO  |
| 2507 | <i>Tragopogon bakhtiaricus</i> Rech.f.                    | Asteraceae      | Irano-Turanian | Za             | Hemicryptophyte | YES |

|      |                                                              |              |                                   |                |                 |     |
|------|--------------------------------------------------------------|--------------|-----------------------------------|----------------|-----------------|-----|
| 2508 | <i>Tragopogon caricifolius</i> Boiss.                        | Asteraceae   | Irano-Turanian                    | Az, Al, Za, Ke | Hemicryptophyte | NO  |
| 2509 | <i>Tragopogon erostris</i> Boiss. & Hausskn.                 | Asteraceae   | Irano-Turanian                    | Za             | Hemicryptophyte | YES |
| 2510 | <i>Tragopogon gongylorrhizus</i> Rech.f.                     | Asteraceae   | Euro-Siberian                     |                | Hemicryptophyte | NO  |
| 2511 | <i>Tragopogon jesdianus</i> Boiss. & Buhse                   | Asteraceae   | Irano-Turanian                    | Al, Za, Ke, Ko | Hemicryptophyte | NO  |
| 2512 | <i>Tragopogon kotschyi</i> Boiss.                            | Asteraceae   | Irano-Turanian                    | Az, Al         | Hemicryptophyte | NO  |
| 2513 | <i>Tragopogon kurdicus</i> Safavi & Maroofi                  | Asteraceae   | Irano-Turanian                    | Za             | Hemicryptophyte | YES |
| 2514 | <i>Tragopogon maturatus</i> Boriss.                          | Asteraceae   | Irano-Turanian                    | Al             | Therophyte      | YES |
| 2515 | <i>Tragopogon porphyrocephalus</i> Rech.f.                   | Asteraceae   | Irano-Turanian                    | Az, Za, Al     | Hemicryptophyte | NO  |
| 2516 | <i>Tragopogon rezaiyensis</i> Rech.f.                        | Asteraceae   | Irano-Turanian                    | Az, Za         | Hemicryptophyte | NO  |
| 2517 | <i>Tragopogon stroterocarpus</i> Rech.f.                     | Asteraceae   | Irano-Turanian                    | Az, Za         | Hemicryptophyte | YES |
| 2518 | <i>Trichodesma aellenii</i> Riedl                            | Boraginaceae | Irano-Turanian                    | Al, Ko         | Hemicryptophyte | YES |
| 2519 | <i>Trichodesma aucheri</i> DC.                               | Boraginaceae | Irano-Turanian                    | Za, Ke         | Hemicryptophyte | NO  |
| 2520 | <i>Trichodesma elymaiticum</i> Mozaff.                       | Boraginaceae | Saharo-Sindian                    |                | Hemicryptophyte | YES |
| 2521 | <i>Trichodesma macrocarpum</i> Rech.f., Aellen & Esfand.     | Boraginaceae | Saharo-Sindian                    |                | Hemicryptophyte | YES |
| 2522 | <i>Tricholepis edmondsonii</i> Rech.f.                       | Asteraceae   | Irano-Turanian                    | Ke             | Chamaephyte     | YES |
| 2523 | <i>Trifolium mazanderanicum</i> Rech.f.                      | Fabaceae     | Euro-Siberian                     |                | Hemicryptophyte | YES |
| 2524 | <i>Trifolium radicosum</i> Boiss. & Hohen.                   | Fabaceae     | Irano-Turanian                    | Al, Az         | Hemicryptophyte | NO  |
| 2525 | <i>Trigonella aphanoneura</i> Rech.f.                        | Fabaceae     | Irano-Turanian                    | Za             | Chamaephyte     | YES |
| 2526 | <i>Trigonella bakhtiarica</i> Ranjbar & Z.Hajmoradi          | Fabaceae     | Irano-Turanian                    | Za             | Chamaephyte     | YES |
| 2527 | <i>Trigonella disperma</i> Bornm.                            | Fabaceae     | Irano-Turanian                    | Az, Za         | Chamaephyte     | NO  |
| 2528 | <i>Trigonella elliptica</i> Boiss.                           | Fabaceae     | Irano-Turanian                    | Al, Za, Ko     | Chamaephyte     | NO  |
| 2529 | <i>Trigonella latialata</i> (Bornm.) Vassilcz.               | Fabaceae     | Irano-Turanian                    | Ke             | Chamaephyte     | YES |
| 2530 | <i>Trigonella persica</i> Boiss.                             | Fabaceae     | Irano-Turanian,<br>Saharo-Sindian | Za             | Therophyte      | NO  |
| 2531 | <i>Trigonella stenocarpa</i> Rech.f.                         | Fabaceae     | Irano-Turanian                    |                | Chamaephyte     | YES |
| 2532 | <i>Trigonella subenervis</i> Rech.f.                         | Fabaceae     | Irano-Turanian                    | Ko             | Chamaephyte     | YES |
| 2533 | <i>Trigonella teheranica</i> (Bornm.) Grossh.                | Fabaceae     | Irano-Turanian                    | Al             | Chamaephyte     | YES |
| 2534 | <i>Trigonella yasujensis</i> Ranjbar, Z.Hajmoradi & Karamain | Fabaceae     | Irano-Turanian                    | Za             | Chamaephyte     | YES |
| 2535 | <i>Trigonoscladium brachytaenium</i> (Boiss.) Alava          | Apiaceae     | Irano-Turanian                    | Az, Za         | Hemicryptophyte | NO  |
| 2536 | <i>Trisetum bungei</i> Boiss.                                | Poaceae      | Irano-Turanian                    | Al, Za         | Hemicryptophyte | YES |
| 2537 | <i>Tulipa harazensis</i> Rech.f.                             | Liliaceae    | Irano-Turanian                    | Al             | Geophyte        | YES |

|      |                                                            |                  |                                   |        |                 |     |
|------|------------------------------------------------------------|------------------|-----------------------------------|--------|-----------------|-----|
| 2538 | <i>Tulipa montana</i> Lindl.                               | Liliaceae        | Irano-Turanian                    | Al, Za | Geophyte        | NO  |
| 2539 | <i>Tulipa ulophylla</i> Wendelbo                           | Liliaceae        | Irano-Turanian                    | Al     | Geophyte        | YES |
| 2540 | <i>Tulipa urumiensis</i> Stapf                             | Liliaceae        | Irano-Turanian                    | Az     | Geophyte        | YES |
| 2541 | <i>Tulipa wendelboi</i> Matin & Iranshahr                  | Liliaceae        | Euro-Siberian                     | Al     | Geophyte        | YES |
| 2542 | <i>Typha azerbaijanensis</i> Hamdi & Assadi                | Typhaceae        | Irano-Turanian                    | Az     | Geophyte        | YES |
| 2543 | <i>Typha kalatensis</i> Assadi & Hamdi                     | Typhaceae        | Irano-Turanian                    | Ko     | Geophyte        | YES |
| 2544 | <i>Ulmus boissieri</i> Grudz.                              | Ulmaceae         | Irano-Turanian                    | Za, Ke | Phanerophyte    | NO  |
| 2545 | <i>Ungernia flava</i> Boiss. & Hausskn.                    | Amaryllidaceae   | Irano-Turanian                    | Az, Za | Geophyte        | NO  |
| 2546 | <i>Verbascum albidiflorum</i> Ranjbar & Nouri              | Scrophulariaceae | Irano-Turanian                    | Za     | Hemicryptophyte | YES |
| 2547 | <i>Verbascum aucheri</i> (Boiss.) Hub.-Mor.                | Scrophulariaceae | Irano-Turanian                    | Az, Al | Hemicryptophyte | NO  |
| 2548 | <i>Verbascum austroiranicum</i> Hub.-Mor.                  | Scrophulariaceae | Irano-Turanian                    | Za     | Hemicryptophyte | YES |
| 2549 | <i>Verbascum azerbaijanense</i> Sharifnia & Assadi         | Scrophulariaceae | Irano-Turanian                    | Az     | Hemicryptophyte | YES |
| 2550 | <i>Verbascum bornmuellerianum</i> Hub.-Mor.                | Scrophulariaceae | Irano-Turanian                    | Az, Za | Hemicryptophyte | YES |
| 2551 | <i>Verbascum carmanicum</i> (Bornm.) Hub.-Mor.             | Scrophulariaceae | Irano-Turanian                    | Ke     | Hemicryptophyte | NO  |
| 2552 | <i>Verbascum disjectum</i> (Murb.) Hub.-Mor.               | Scrophulariaceae | Irano-Turanian                    |        | Hemicryptophyte | NO  |
| 2553 | <i>Verbascum farsistanicum</i> (Murb.) Hub.-Mor.           | Scrophulariaceae | Irano-Turanian,<br>Saharo-Sindian |        | Hemicryptophyte | NO  |
| 2554 | <i>Verbascum gabrielliae</i> (Bornm.) Hub.-Mor.            | Scrophulariaceae | Irano-Turanian                    | Ke, Lo | Hemicryptophyte | YES |
| 2555 | <i>Verbascum hasarense</i> Freyn & Bornm.                  | Scrophulariaceae | Irano-Turanian                    | Za, Ke | Hemicryptophyte | YES |
| 2556 | <i>Verbascum haussknechtianum</i> Hub.-Mor.                | Scrophulariaceae | Irano-Turanian                    | Za     | Hemicryptophyte | NO  |
| 2557 | <i>Verbascum intricatum</i> Kuntze                         | Scrophulariaceae | Irano-Turanian                    | Za     | Hemicryptophyte | NO  |
| 2558 | <i>Verbascum kermanense</i> Hub.-Mor.                      | Scrophulariaceae | Irano-Turanian                    | Ke, Lo | Hemicryptophyte | YES |
| 2559 | <i>Verbascum kochiiforme</i> Boiss. & Hausskn.             | Scrophulariaceae | Saharo-Sindian                    |        | Hemicryptophyte | NO  |
| 2560 | <i>Verbascum lyprocarpum</i> (Murb.) Hub.-Mor.             | Scrophulariaceae | Irano-Turanian                    | Za, Ke | Hemicryptophyte | YES |
| 2561 | <i>Verbascum scoparium</i> Mozaff.                         | Scrophulariaceae | Irano-Turanian                    | Ke     | Hemicryptophyte | YES |
| 2562 | <i>Verbascum shahsavarensis</i> Sotoodeh, Attar & Civeyrel | Scrophulariaceae | Euro-Siberian                     | Al     | Hemicryptophyte | YES |
| 2563 | <i>Verbascum straussii</i> (Bornm.) Hub.-Mor.              | Scrophulariaceae | Irano-Turanian                    | Za     | Hemicryptophyte | NO  |
| 2564 | <i>Verbascum sublobatum</i> Murb.                          | Scrophulariaceae | Irano-Turanian,<br>Euro-Siberian  | Al     | Hemicryptophyte | NO  |
| 2565 | <i>Veronica acrotheca</i> Bornm. & Gauba                   | Scrophulariaceae | Irano-Turanian                    | Al, Za | Hemicryptophyte | NO  |
| 2566 | <i>Veronica aucheri</i> Boiss.                             | Scrophulariaceae | Irano-Turanian                    | Al     | Hemicryptophyte | NO  |
| 2567 | <i>Veronica bungei</i> Boiss.                              | Scrophulariaceae | Irano-Turanian                    | Al     | Therophyte      | YES |

|      |                                                      |                  |                                  |                |                 |     |
|------|------------------------------------------------------|------------------|----------------------------------|----------------|-----------------|-----|
| 2568 | <i>Veronica chionantha</i> Bornm.                    | Scrophulariaceae | Irano-Turanian                   | Al             | Chamaephyte     | YES |
| 2569 | <i>Veronica daranica</i> Saeidi & Ghahr.             | Scrophulariaceae | Irano-Turanian                   | Za             | Hemicryptophyte | YES |
| 2570 | <i>Veronica euphrasiifolia</i> Link                  | Scrophulariaceae | Irano-Turanian                   | Al             | Hemicryptophyte | YES |
| 2571 | <i>Veronica farinosa</i> Hausskn.                    | Scrophulariaceae | Irano-Turanian                   | Za             | Hemicryptophyte | NO  |
| 2572 | <i>Veronica fragilis</i> Boiss. & Hausskn.           | Scrophulariaceae | Irano-Turanian                   | Za             | Chamaephyte     | NO  |
| 2573 | <i>Veronica francispetae</i> M.A.Fisch.              | Scrophulariaceae | Euro-Siberian                    | Al             | Therophyte      | NO  |
| 2574 | <i>Veronica kopetdaghensis</i> B.Fedtsch. ex Boriss. | Scrophulariaceae | Irano-Turanian                   | Ko             | Hemicryptophyte | YES |
| 2575 | <i>Veronica kurdica</i> Benth.                       | Scrophulariaceae | Irano-Turanian                   | Za, Al, Ke     | Hemicryptophyte | NO  |
| 2576 | <i>Veronica longipedicellata</i> Saeidi              | Scrophulariaceae | Irano-Turanian                   | Al             | Therophyte      | YES |
| 2577 | <i>Veronica mazanderanae</i> Wendelbo                | Scrophulariaceae | Irano-Turanian,<br>Euro-Siberian | Al, Az         | Therophyte      | NO  |
| 2578 | <i>Veronica mirabilis</i> Wendelbo                   | Scrophulariaceae | Irano-Turanian                   | Al             | Hemicryptophyte | YES |
| 2579 | <i>Veronica paederotae</i> Boiss.                    | Scrophulariaceae | Irano-Turanian                   | Al             | Hemicryptophyte | NO  |
| 2580 | <i>Veronica rechingeri</i> M.A.Fisch.                | Scrophulariaceae | Irano-Turanian                   | Al             | Hemicryptophyte | NO  |
| 2581 | <i>Veronica rubrifolia</i> Boiss.                    | Scrophulariaceae | Irano-Turanian                   | Al, Za, Ke     | Therophyte      | NO  |
| 2582 | <i>Vicia aucheri</i> Jaub. & Spach                   | Fabaceae         | Irano-Turanian                   | Al             | Hemicryptophyte | YES |
| 2583 | <i>Vicia ciceroidea</i> Boiss.                       | Fabaceae         | Irano-Turanian                   | Al, Za, Az     | Hemicryptophyte | NO  |
| 2584 | <i>Vicia kotschyana</i> Boiss.                       | Fabaceae         | Irano-Turanian                   | Za             | Hemicryptophyte | YES |
| 2585 | <i>Vicia kurdica</i> Jalilian                        | Fabaceae         | Irano-Turanian                   | Za             | Therophyte      | YES |
| 2586 | <i>Vicia persica</i> Boiss.                          | Fabaceae         | Irano-Turanian                   | Az, Al         | Hemicryptophyte | NO  |
| 2587 | <i>Vicia sojakii</i> Chrtkova                        | Fabaceae         | Irano-Turanian                   | Al             | Hemicryptophyte | YES |
| 2588 | <i>Vincetoxicum assadii</i> Zaeifi                   | Asclepiadaceae   | Irano-Turanian                   | Za             | Chamaephyte     | YES |
| 2589 | <i>Vincetoxicum mozaffarianii</i> Zaeifi             | Asclepiadaceae   | Irano-Turanian                   | Ke             | Chamaephyte     | YES |
| 2590 | <i>Viola pachyrrhiza</i> Boiss. & Hohen.             | Violaceae        | Irano-Turanian                   | Az             | Hemicryptophyte | YES |
| 2591 | <i>Viola spathulata</i> Willd. ex Schult.            | Violaceae        | Irano-Turanian                   | Al             | Hemicryptophyte | NO  |
| 2592 | <i>Zeravschania aucheri</i> (Boiss.) Pimenov         | Apiaceae         | Irano-Turanian                   | Az, Al, Za, Ko | Hemicryptophyte | NO  |
| 2593 | <i>Zeravschania membranacea</i> (Boiss.) Pimenov     | Apiaceae         | Irano-Turanian                   | Az, Al, Za     | Hemicryptophyte | NO  |
| 2594 | <i>Zerdana anchonioides</i> Boiss.                   | Brassicaceae     | Irano-Turanian                   | Za, Ke         | Hemicryptophyte | NO  |
| 2595 | <i>Zeugandra iranica</i> P.H.Davis                   | Campanulaceae    | Irano-Turanian                   | Za             | Chamaephyte     | NO  |
| 2596 | <i>Zhumeria majdae</i> Rech.f. & Wendelbo            | Lamiaceae        | Saharo-Sindian                   |                | Chamaephyte     | NO  |
| 2597 | <i>Zosima radians</i> Boiss. & Hohen.                | Apiaceae         | Irano-Turanian                   | Al, Za         | Hemicryptophyte | NO  |

Table S2. The list of new vascular plant species published after Flora Iranica<sup>83</sup> and Flora of Iran<sup>84</sup>.

| <b>Nr</b> | <b>Species</b>                                            | <b>Family</b>   | <b>Reference</b>                                            |
|-----------|-----------------------------------------------------------|-----------------|-------------------------------------------------------------|
| 1         | <i>Acantholimon albocalycinum</i> Assadi & Mirtadz.       | Plumbaginaceae  | Assadi & Mirtadzadini (2006) Iran. J. Bot. 11(2) 129-136.   |
| 2         | <i>Acantholimon bakhtiaricum</i> Assadi                   | Plumbaginaceae  | Assadi (2003) Iran. J. Bot. 10(1) 25-29.                    |
| 3         | <i>Acantholimon densiflorum</i> Assadi                    | Plumbaginaceae  | Assadi (2005) Iran. J. Bot. 11(1) 31-39.                    |
| 4         | <i>Acantholimon flabellum</i> Assadi                      | Plumbaginaceae  | Assadi (2005) Iran. J. Bot. 11(1) 31-39.                    |
| 5         | <i>Acantholimon glabratum</i> Assadi                      | Plumbaginaceae  | Assadi (2005) Iran. J. Bot. 11(1) 31-39.                    |
| 6         | <i>Acantholimon hormozganense</i> Assadi                  | Plumbaginaceae  | Assadi (2004) Iran. J. Bot. 10(2) 153-157.                  |
| 7         | <i>Acantholimon kermanense</i> Assadi & Mirtadz.          | Plumbaginaceae  | Assadi & Mirtadzadini (2006) Iran. J. Bot. 11(2) 129-136.   |
| 8         | <i>Acantholimon mirtadzadini</i> Assadi                   | Plumbaginaceae  | Assadi (2003) Iran. J. Bot. 10(1) 25-29.                    |
| 9         | <i>Acantholimon moradii</i> Assadi                        | Plumbaginaceae  | Assadi (2005) Iran. J. Bot. 11(1) 31-39.                    |
| 10        | <i>Acantholimon sirschense</i> Assadi & Mirtadz.          | Plumbaginaceae  | Assadi & Mirtadzadini (2006) Iran. J. Bot. 11(2) 129-136.   |
| 11        | <i>Acantholimon zaeifii</i> Assadi                        | Plumbaginaceae  | Assadi (2004) Iran. J. Bot. 10(2) 153-157.                  |
| 12        | <i>Acanthophyllum ejtehadii</i> Mahmoudi & Vaezi          | Caryophyllaceae | Mahmoudi Shamsabad et al. (2012) Iran. J. Bot. 18(1) 59-63. |
| 13        | <i>Acanthophyllum yasamin-nassehiae</i> Joharchi & Pirani | Caryophyllaceae | Pirani et al. (2013) Phytotaxa 92(2) 20-24                  |
| 14        | <i>Acer mazandaranicum</i> Amini, H.Zare & Assadi         | Aceraceae       | Amini et al. (2008) Iran. J. Bot. 14(2) 81-86.              |
| 15        | <i>Aeluropus laciniatus</i> Khodash.                      | Poaceae         | Khodashenas & Joharchi (2012) Iran. J. Bot. 18(1) 64-66.    |
| 16        | <i>Aeluropus peterganicus</i> Khodash.                    | Poaceae         | Khodashenas (2008) Iran. J. Bot. 14(1) 13- 15.              |
| 17        | <i>Aethionema sabzevaricum</i> Khosravi & Joharchi        | Brassicaceae    | Khosravi et al. (2011) Iran. J. Bot. 17(1) 119-124.         |
| 18        | <i>Aethionema semnanensis</i> Mozaff.                     | Brassicaceae    | Mozaffarian (1996) Iran. J. Bot. 7(1) 127-142.              |
| 19        | <i>Agrostis gariana</i> Taheri                            | Poaceae         | Taheri (2013) Iran. J. Bot. 19(1) 40-43.                    |
| 20        | <i>Ajuga saxicola</i> Assadi & Jamzad                     | Lamiaceae       | Jamzad & Assadi (1984) Iran. J. Bot. 2(2) 95-102.           |
| 21        | <i>Alcea assadii</i> Pakravan                             | Malvaceae       | Pakravan (2006) Iran. J. Bot. 12(2) 183-186.                |
| 22        | <i>Alcea ghahremanii</i> Pakravan & Assadi                | Malvaceae       | Pakravan & Ghahreman (2002) Iran. J. Bot. 9(2) 245-247.     |
| 23        | <i>Alcea ilamica</i> Pakravan                             | Malvaceae       | Pakravan (2003) Rostaniha. 4(3-4) 93-98.                    |
| 24        | <i>Alcea iranshahrii</i> Pakravan, Ghahr. & Assadi        | Malvaceae       | Pakravan & Ghahreman (2005) Rostaniha. 6 51-59.             |
| 25        | <i>Alcea mozaffarianii</i> Ghahr., Pakravan & Assadi      | Malvaceae       | Pakravan & Ghahreman (2005) Rostaniha. 6 51-59.             |



|    |                                                           |                 |                                                                                                                                 |
|----|-----------------------------------------------------------|-----------------|---------------------------------------------------------------------------------------------------------------------------------|
| 26 | <i>Alcea semnanica</i> Pakravan                           | Malvaceae       | Pakravan (2006) Iran. J. Bot. 12(2) 183-186.                                                                                    |
| 27 | <i>Allium alamutense</i> Razyfard, Zarre & R.M.Fritsch    | Alliaceae       | Razyfard et al. (2011) Ann. Bot. Fennici 48, 352-360                                                                            |
| 28 | <i>Allium assadii</i> Seisums                             | Alliaceae       | Seisums (2000) Iran. J. Bot. 8(2).223-232.                                                                                      |
| 29 | <i>Allium autumniflorum</i> F.O.Khass. & Akhani           | Alliaceae       | Khassanov et al. (2006) Rostaniha 7(suppl.2) 119-129.                                                                           |
| 30 | <i>Allium chlorotepalum</i> R.M.Fritsch & M.Jaeger        | Alliaceae       | Fritsch & Maroofi (2010) Phytton (Horn, Austria) 50(1) 1-32.                                                                    |
| 31 | <i>Allium esfandiarii</i> Matin                           | Alliaceae       | Matin (1989) Iran. J. Bot. 4(2) 165-170.                                                                                        |
| 32 | <i>Allium jaegeri</i> R.M.Fritsch                         | Alliaceae       | Fritsch & Maroofi (2010) Phytton (Horn, Austria) 50(1) 1-32.<br>Khassanov & Memariani (2006) Rostaniha. Vol. 7(suppl. 2) 65-69. |
| 33 | <i>Allium joharchii</i> F.O.Khass. & Memariani            | Alliaceae       |                                                                                                                                 |
| 34 | <i>Allium kuhrangense</i> Akhavan, Saeidi & R.M.Fritsch   | Alliaceae       | Akhavan et al. (2014) Phytotaxa 170(3) 213-218.                                                                                 |
| 35 | <i>Allium kurdistanicum</i> Maroofi & R.M.Fritsch         | Alliaceae       | Razyfard et al. (2011) Ann. Bot. Fennici 48 352-360.                                                                            |
| 36 | <i>Allium longipapillatum</i> R.M.Fritsch & Matin         | Alliaceae       | Fritsch et al. (2006) Rostaniha. 7(suppl.2) 255-281.                                                                            |
| 37 | <i>Allium mahneshanense</i> Razyfard, Zarre & R.M.Fritsch | Alliaceae       | Razyfard et al. (2011) Ann. Bot. Fennici 48 352-360.                                                                            |
| 38 | <i>Allium montelburzense</i> R.M.Fritsch, Salmaki & Zarre | Alliaceae       | Fritsch et al. (2006) Rostaniha. 7(suppl.2) 255-281.                                                                            |
| 39 | <i>Allium mozaffarianii</i> Maroofi & R.M.Fritsch         | Alliaceae       | Fritsch & Maroofi (2010) Phytton (Horn, Austria) 50(1) 1-32.                                                                    |
| 40 | <i>Allium najafdaricum</i> R.M.Fritsch                    | Alliaceae       | Fritsch & Maroofi (2010) Phytton (Horn, Austria) 50(1) 1-32.                                                                    |
| 41 | <i>Allium subakaka</i> Razyfard & Zarre                   | Alliaceae       | Razyfard et al. (2011) Ann. Bot. Fennici 48 352-360.                                                                            |
| 42 | <i>Allium tuchalense</i> F.O.Khass. & Noroozi             | Alliaceae       | Khassanov et al. (2006) Rostaniha 7(suppl.2) 119-129.                                                                           |
| 43 | <i>Allium wendelboi</i> Matin                             | Alliaceae       | Matin (1989) Iran. J. Bot. 4(2) 165-170.                                                                                        |
| 44 | <i>Allochrysa lutea</i> Falat. & Mahmoodi                 | Caryophyllaceae | Mahmoodi & Nejad Falatoury (2016) 277(2) 191-198.                                                                               |
| 45 | <i>Alyssum hezarmasjedense</i> Kavousi & Nazary           | Brassicaceae    | Kavousi et al. (2014) Novon 23(1) 59-61.                                                                                        |
| 46 | <i>Alyssum mozaffarianii</i> Kavousi                      | Brassicaceae    | Kavousi (2001) Iran. J. Bot. 9(1) 47-54.                                                                                        |
| 47 | <i>Alyssum stipitatum</i> Kavousi & T.R.Dudley            | Brassicaceae    | Kavousi (2001) Iran. J. Bot. 9(1) 47-54.                                                                                        |
| 48 | <i>Amberboa lippii</i> (L.) DC.                           | Asteraceae      | Mozaffarian (1988) Iran. J. Bot. 4(1) 61-70.                                                                                    |
| 49 | <i>Amberboa maroofii</i> Negaresh                         | Asteraceae      | Negaresh (2015) Phytotaxa 195(2) 171-177.                                                                                       |
| 50 | <i>Amygdalus reticulata</i> Runemark ex Khat.             | Rosaceae        | Khatamsaz (1985) Iran. J. Bot. 3(1) 77-80.                                                                                      |
| 51 | <i>Amygdalus wendelboi</i> Freitag                        | Rosaceae        | Freitag (1977) Iran. J. Bot. 1(2) 117-120.                                                                                      |
| 52 | <i>Anabasis firouzii</i> Akhani                           | Chenopodiaceae  | Akhani et al. (2016) Phytotaxa 249(1) 159-180.                                                                                  |
| 53 | <i>Angelica urumiensis</i> Mozaff.                        | Apiaceae        | Mozaffarian (2013) Rostaniha 14(1) 36-42.                                                                                       |

|    |                                                                        |                 |                                                                                                                     |
|----|------------------------------------------------------------------------|-----------------|---------------------------------------------------------------------------------------------------------------------|
| 54 | <i>Arenaria assadii</i> Fadaie                                         | Caryophyllaceae | Fadaie (2013) Iran. J. Bot. 19(1) 32-39.                                                                            |
| 55 | <i>Arenaria kandavanensis</i> Fadaie, Sheidai & Assadi                 | Caryophyllaceae | Fadaie et al. (201) Iran. J. Bot. 16(2) 218-220.                                                                    |
| 56 | <i>Arenaria longibracteata</i> Fadaie                                  | Caryophyllaceae | Fadaie (2013) Iran. J. Bot. 19(1) 32-39.                                                                            |
| 57 | <i>Arenaria semiromica</i> Fadaie                                      | Caryophyllaceae | Fadaie (2013) Iran. J. Bot. 19(1) 32-39.                                                                            |
| 58 | <i>Arum giganteum</i> Ghahr.                                           | Araceae         | Ghahreman (1983) Iran. J. Bot. 2(1) 79-81.<br>Hamdi & Assadi (2009) Feddes Repertorium 120 (7-8) 419-425.           |
| 59 | <i>Asparagus khorasanensis</i> Hamdi & Assadi                          | Asparagaceae    | Hamdi & Assadi (2013) Iran. J. Bot. 19 (1) 44-46.                                                                   |
| 60 | <i>Asparagus touranensis</i> Hamdi & Assadi                            | Asparagaceae    | Hamdi & Assadi (2013) Iran. J. Bot. 19 (1) 44-46.                                                                   |
| 61 | <i>Asperula oppositifolia</i> Regel & Schmalh.                         | Rubiaceae       | Ghahremaninejad et al. (2006) Rostaniha. 7(suppl.2) 207-212.                                                        |
| 62 | <i>Aster bachtiaricus</i> Mozaff.                                      | Asteraceae      | Mozaffarian (2006) Iran. J. Bot. 7(1) 127-142.<br>Podlech & Maassoumi (2003) Feddes Repertorium 114(5-6) 320-351.   |
| 63 | <i>Astragalus abharensis</i> Maassoumi & Podlech                       | Fabaceae        | Zarre et al. (2005) Feddes Repertorium 116(1-2) 54- 79.                                                             |
| 64 | <i>Astragalus absconditus</i> Zarre & Podlech                          | Fabaceae        | Zarre et al. (2005) Feddes Repertorium 116(1-2) 54- 79.                                                             |
| 65 | <i>Astragalus affinis</i> Podlech & Zarre                              | Fabaceae        | Zarre et al. (2005) Feddes Repertorium 116(1-2) 54- 79.                                                             |
| 66 | <i>Astragalus ahangarensis</i> Zarre & Podlech                         | Fabaceae        | Zarre et al. (2005) Feddes Repertorium 116(1-2) 54- 79.                                                             |
| 67 | <i>Astragalus aharicus</i> Maassoumi & Podlech                         | Fabaceae        | Podlech & Maassoumi (1987) Iran. J. Bot. 3(2) 95-110.                                                               |
| 68 | <i>Astragalus aliomranii</i> Maassoumi                                 | Fabaceae        | Maassoumi (2002) Iran. J. Bot. 9(2) 121-125.<br>Podlech & Maassoumi (2003) Feddes Repertorium 114 (5-6) 320-351.    |
| 69 | <i>Astragalus altimontanus</i> Podlech & Maassoumi                     | Fabaceae        | Maassoumi & Ghahremaninejad (1999) Iran. J. Bot. 8(1) 35-41.                                                        |
| 70 | <i>Astragalus altiusculus</i> Maassoumi & Ghahrem.                     | Fabaceae        | Podlech & Zarre (2003) Willdenowia 33 341-352.                                                                      |
| 71 | <i>Astragalus ammodendroides</i> Bornm.                                | Fabaceae        | Ghahremaninejad & Bagheri (2009) Iran. J. Bot. 15(2) 175-177.                                                       |
| 72 | <i>Astragalus andabaddensis</i> Maassoumi, Bagheri & F.Ghahrem.        | Fabaceae        | Zarre et al. (2005) Feddes Repertorium 116(1-2) 54- 79.                                                             |
| 73 | <i>Astragalus anodiophilus</i> Zarre & Podlech                         | Fabaceae        | Podlech & Maassoumi (2003) Feddes Repertorium 114 (5-6) 320-351.                                                    |
| 74 | <i>Astragalus ashtianensis</i> Podlech & Maassoumi                     | Fabaceae        | Podlech & Maassoumi (1987) Iran. J. Bot. 3(2) 95-110.                                                               |
| 75 | <i>Astragalus assadii</i> Maassoumi & Podlech                          | Fabaceae        | Podlech & Maassoumi (1987) Iran. J. Bot. 3(2) 95-110.                                                               |
| 76 | <i>Astragalus austromahneshanensis</i> F.Ghahrem., Maassoumi & Bagheri | Fabaceae        | Bagheri et al. (2011) Iran. J. Bot.17(1) 15-19.<br>Podlech & Maassoumi (2003) Feddes Repertorium 114 (5-6) 320-351. |
| 77 | <i>Astragalus aznaicus</i> Podlech & Maassoumi                         | Fabaceae        | Podlech & Maassoumi (2003) Feddes Repertorium 114 (5-6) 320-351.                                                    |
| 78 | <i>Astragalus babakhanloui</i> Maassoumi & Podlech                     | Fabaceae        | Podlech & Maassoumi (1987) Iran. J. Bot. 4(1) 71-90.                                                                |

|     |                                                                |          |                                                                                                                           |
|-----|----------------------------------------------------------------|----------|---------------------------------------------------------------------------------------------------------------------------|
| 79  | <i>Astragalus baftensis</i> Ranjbar & Maassoumi                | Fabaceae | Ranjbar (2011) Iran. J. Bot. 17(1) 1-5.                                                                                   |
| 80  | <i>Astragalus bavanatensis</i> Maassoumi, Nowroozi & Podlech   | Fabaceae | Maassoumi (2005) Iran. J. Bot. 11(1) 101-109.                                                                             |
| 81  | <i>Astragalus bazarganii</i> Podlech & Zarre                   | Fabaceae | Podlech & Zarre (2003) Willdenowia 33 341-352.<br>Podlech & Maassoumi (2003) Feddes Repertorium 114(5-6) 320-351.         |
| 82  | <i>Astragalus bejourensis</i> Podlech & Maassoumi              | Fabaceae | Podlech & Maassoumi (2003) Feddes Repertorium 114(5-6) 320-351.                                                           |
| 83  | <i>Astragalus belgheisicoides</i> Podlech & Maassoumi          | Fabaceae | Podlech & Maassoumi (2003) Feddes Repertorium 114(5-6) 320-351.                                                           |
| 84  | <i>Astragalus biarjmandicus</i> Podlech & Zarre                | Fabaceae | Podlech & Zarre (2003) Willdenowia 33 341-352.                                                                            |
| 85  | <i>Astragalus borujenensis</i> Ranjbar & Maassoumi             | Fabaceae | Ranjbar et al. (2007) Iran. J. Bot. 13(2) 82-86.                                                                          |
| 86  | <i>Astragalus bozghoushensis</i> Maassoumi, Mozaff. & Ramezani | Fabaceae | Maassoumi et al. (2015) Iran. J. Bot. 21(2) 94-99.<br>Podlech & Maassoumi (2003) Feddes Repertorium 114(5-6) 320-351.     |
| 87  | <i>Astragalus bukanensis</i> Maassoumi & Podlech               | Fabaceae | Podlech & Maassoumi (2003) Feddes Repertorium 114(5-6) 320-351.                                                           |
| 88  | <i>Astragalus chaldoranicus</i> Podlech & Maassoumi            | Fabaceae | Podlech & Maassoumi (2003) Feddes Repertorium 114(5-6) 320-351.                                                           |
| 89  | <i>Astragalus chichesticus</i> Podlech & Maassoumi             | Fabaceae | Podlech & Maassoumi (2003) Feddes Repertorium 114(5-6) 320-351.                                                           |
| 90  | <i>Astragalus ciceropsis</i> Hamzehee & Maassoumi              | Fabaceae | Maassoumi & Hamzehee (2003) Iran. J. Bot. 10(1) 59-61.<br>Podlech & Maassoumi (2003) Feddes Repertorium 114(5-6) 320-351. |
| 91  | <i>Astragalus clivicola</i> Podlech & Maassoumi                | Fabaceae | Podlech & Maassoumi (1987) Iran. J. Bot. 3(2) 95-110.                                                                     |
| 92  | <i>Astragalus controversus</i> Maassoumi & Podlech             | Fabaceae | Maassoumi & Kazempour osaloo (2006) Iran. Jour. Bot. 11(2) 137-142.                                                       |
| 93  | <i>Astragalus culminatus</i> Maassoumi, Kaz.Osaloo & Joharchi  | Fabaceae | Zarre et al. (2005) Feddes Repertorium 116(1-2) 54- 79.                                                                   |
| 94  | <i>Astragalus damghanensis</i> Podlech                         | Fabaceae | Podlech & Zarre (2003) Willdenowia 33 341-352.                                                                            |
| 95  | <i>Astragalus darrehbidensis</i> Podlech & Zarre               | Fabaceae | Zarre et al. (2005) Feddes Repertorium 116(1-2) 54-79.                                                                    |
| 96  | <i>Astragalus dorudensis</i> Zarre & Podlech                   | Fabaceae | Podlech & Maassoumi (1987) Iran. J. Bot. 4(1) 71-90.                                                                      |
| 97  | <i>Astragalus doshman-ziariensis</i> Maassoumi & Podlech       | Fabaceae | Zarre et al. (2005) Feddes Repertorium 116(1-2) 54-79.                                                                    |
| 98  | <i>Astragalus dysbatophilus</i> Zarre & Podlech                | Fabaceae | Zarre et al. (2005) Feddes Repertorium 116(1-2) 54-79.                                                                    |
| 99  | <i>Astragalus ebrahimabadensis</i> Zarre & Podlech             | Fabaceae | Maassoumi & Kazempour osaloo (2006) Iran. Jour. Bot. 11(2) 137-142.                                                       |
| 100 | <i>Astragalus elezgensis</i> Maassoumi & Kaz.Osaloo            | Fabaceae | Podlech & Maassoumi (2003) Feddes Repertorium 114(5-6) 320-351.                                                           |
| 101 | <i>Astragalus estahbanensis</i> Maassoumi & Podlech            | Fabaceae |                                                                                                                           |

|     |                                                                           |          |                                                                                                                                                                          |
|-----|---------------------------------------------------------------------------|----------|--------------------------------------------------------------------------------------------------------------------------------------------------------------------------|
| 102 | <i>Astragalus facetus</i> Maassoumi & Podlech                             | Fabaceae | Podlech & Maassoumi (1987) Iran. J. Bot. 4(1) 71-90.<br>Podlech & Maassoumi (2003) Feddes Repertorium 114(5-6) 320-351.                                                  |
| 103 | <i>Astragalus fagh-soleimanensis</i> Maassoumi & Podlech                  | Fabaceae |                                                                                                                                                                          |
| 104 | <i>Astragalus gandomanicus</i> Podlech                                    | Fabaceae | Podlech (2009) Feddes Repertorium 120 48658.                                                                                                                             |
| 105 | <i>Astragalus ghamishluensis</i> Dastpak, Maassoumi & Kaz.Osaloo          | Fabaceae | Dastpak et al. (2011) Iran. J. Bot. 17(2) 175-177.                                                                                                                       |
| 106 | <i>Astragalus gigantirostratus</i> Maassoumi, Ghahr., Ghahrem. & F.Matin. | Fabaceae | Maassoumi et al. (1999) Willdenowia 29 221-225.                                                                                                                          |
| 107 | <i>Astragalus glaucopsiformis</i> Maassoumi                               | Fabaceae | Maassoumi (2000) Iran. J. Bot. 8(2) 309-326.<br>Podlech & Maassoumi (2003) Feddes Repertorium 114(5-6) 320-351.                                                          |
| 108 | <i>Astragalus hajiabadensis</i> Podlech & Maassoumi                       | Fabaceae |                                                                                                                                                                          |
| 109 | <i>Astragalus hamadryadis</i> Podlech                                     | Fabaceae | Zarre et al. (2005) Feddes Repertorium 116(1-2) 54-79.                                                                                                                   |
| 110 | <i>Astragalus harazensis</i> Zarre & Podlech                              | Fabaceae | Zarre et al. (2005) Feddes Repertorium 116(1-2) 54-79.                                                                                                                   |
| 111 | <i>Astragalus hecatae</i> Zarre & Podlech                                 | Fabaceae | Zarre et al. (2005) Feddes Repertorium 116(1-2) 54-79.<br>Podlech & Maassoumi (2003) Feddes Repertorium 114(5-6) 320-351.                                                |
| 112 | <i>Astragalus homandicus</i> Maassoumi & Podlech                          | Fabaceae |                                                                                                                                                                          |
| 113 | <i>Astragalus hotkanensis</i> Maassoumi & Mirtadz.                        | Fabaceae | Maassoumi & Mirtadzadini (2006) Iran. J. Bot. 12(1) 90-91.                                                                                                               |
| 114 | <i>Astragalus ignotus</i> Podlech                                         | Fabaceae | Zarre et al. (2005) Feddes Repertorium 116(1-2) 54-79.                                                                                                                   |
| 115 | <i>Astragalus innotabilis</i> Podlech                                     | Fabaceae | Zarre et al. (2005) Feddes Repertorium 116(1-2) 54-79.                                                                                                                   |
| 116 | <i>Astragalus insularis-ashkii</i> Maassoumi & Podlech                    | Fabaceae | Massoumi (2015) Iran. J. Bot. 21(2) 123-125; originally described as <i>A. insularis</i> (nomen illegit.) in Podlech & Maassoumi (2003) Feddes Repert. 114(5-6) 320-351. |
| 117 | <i>Astragalus iranshahrii</i> Maassoumi & Podlech                         | Fabaceae | Podlech & Maassoumi (1987) Iran. J. Bot. 4(1) 71-90.                                                                                                                     |
| 118 | <i>Astragalus issatissensis</i> Maassoumi & Mahmoodi                      | Fabaceae | Mahmoodi et al. (2013) Willdenowia 43 2636270.                                                                                                                           |
| 119 | <i>Astragalus jamzadiae</i> Maassoumi                                     | Fabaceae | Maassoumi (2000) Iran. J. Bot. 8(2) 309-326.                                                                                                                             |
| 120 | <i>Astragalus juladakensis</i> Maassoumi                                  | Fabaceae | Maassoumi (2007) Iran. J. Bot. 13(2) 78-81.                                                                                                                              |
| 121 | <i>Astragalus kabutarlanensis</i> Dehshiri & Maassoumi                    | Fabaceae | Maassoumi & Dehshiri (2006) Iran. J. Bot. 11(2) 193-195.                                                                                                                 |
| 122 | <i>Astragalus kadschoroides</i> Ranjbar                                   | Fabaceae | Ranjbar et al. (2007) Willdenowia 37 35-312.<br>Maassoumi & Kazempour Osaloo (2006) Iran. Jour. Bot. 11(2) 137-142.                                                      |
| 123 | <i>Astragalus kalatehensis</i> Maassoumi & Kaz.Osaloo                     | Fabaceae |                                                                                                                                                                          |
| 124 | <i>Astragalus karl-heinzii</i> Maassoumi                                  | Fabaceae | Maassoumi (2007) Iran. J. Bot. 13(2) 78-81.                                                                                                                              |
| 125 | <i>Astragalus kashmarensis</i> Maassoumi & Podlech                        | Fabaceae | Podlech & Maassoumi (1987) Iran. J. Bot. 3(2) 95-110.                                                                                                                    |

|     |                                                                              |          |                                                                  |
|-----|------------------------------------------------------------------------------|----------|------------------------------------------------------------------|
| 126 | <i>Astragalus khadem-kandicus</i> Maassoumi & Podlech                        | Fabaceae | Podlech & Maassoumi (2003) Feddes Repertorium 114(5-6) 320-351.  |
| 127 | <i>Astragalus khatamsaziae</i> Maassoumi                                     | Fabaceae | Maassoumi (2000) Iran. J. Bot. 8(2) 309-326.                     |
| 128 | <i>Astragalus khongensis</i> Maassoumi, Joharchi & Podlech                   | Fabaceae | Maassoumi (2005) Iran. J. Bot. 11(1) 101-109.                    |
| 129 | <i>Astragalus khonikensis</i> Nasseh & Joharchi                              | Fabaceae | Nasseh et al (2010) Iran. J. Bot. 16(2) 221-224.                 |
| 130 | <i>Astragalus khunsarensis</i> Zarre & Podlech                               | Fabaceae | Zarre et al. (2005) Feddes Repertorium 116(1-2) 54-79.           |
| 131 | <i>Astragalus kiamaky-daghensis</i> Maassoumi & Podlech                      | Fabaceae | Podlech & Maassoumi (2003) Feddes Repertorium 114(5-6) 320-351.  |
| 132 | <i>Astragalus kiviensis</i> Ranjbar & Rahimin.                               | Fabaceae | Ranjbar et al. (2007) Willdenowia 37 35-312.                     |
| 133 | <i>Astragalus lacus-valashti</i> Maassoumi, Podlech & Jalili                 | Fabaceae | Podlech & Maassoumi (2003) Feddes Repertorium 114(5-6) 320-351.  |
| 134 | <i>Astragalus lasiocalycinus</i> Podlech & Maassoumi                         | Fabaceae | Podlech & Maassoumi (2003) Feddes Repertorium 114(5-6) 320-351.  |
| 135 | <i>Astragalus maarofii</i> Podlech & Maassoumi                               | Fabaceae | Podlech & Maassoumi (2003) Feddes Repertorium 114(5-6) 320-351.  |
| 136 | <i>Astragalus magnibracteatus</i> Maassoumi & Maroofi                        | Fabaceae | Maassoumi (2005) Iran. J. Bot. 11(1) 101-109.                    |
| 137 | <i>Astragalus mahneshanensis</i> Maassoumi & Moussavi                        | Fabaceae | Maassoumi (2005) Iran. J. Bot. 11(1) 101-109.                    |
| 138 | <i>Astragalus makuensis</i> Maassoumi, Bagheri & Rahimin.                    | Fabaceae | Bagheri et al. (2014) Phytotaxa 178(1) 38-42.                    |
| 139 | <i>Astragalus markasicus</i> Podlech & Maassoumi                             | Fabaceae | Podlech & Maassoumi (2003) Feddes Repertorium 114(5-6) 320-351.  |
| 140 | <i>Astragalus masulehensis</i> Ranjbar & Assadi                              | Fabaceae | Ranjbar et al. (2005) Willdenowia 35 (1) 117-124.                |
| 141 | <i>Astragalus mehranensis</i> Maassoumi & Mozaff.                            | Fabaceae | Maassoumi & Mozaffarian (2007) Iran. J. Bot. 13(2) 87-88.        |
| 142 | <i>Astragalus mehrizianus</i> Podlech & Maassoumi                            | Fabaceae | Podlech & Maassoumi (2003) Feddes Repertorium 114(5-6) 320-351.  |
| 143 | <i>Astragalus meimandicus</i> Maassoumi & Vakili                             | Fabaceae | Maassoumi & Vakili Shahrebabaki (2001) Iran. J. Bot. 9(1) 69-70. |
| 144 | <i>Astragalus membranostipulus</i> Maassoumi                                 | Fabaceae | Maassoumi (2000) Iran. J. Bot. 8(2) 309-326.                     |
| 145 | <i>Astragalus memnonius</i> Maassoumi & Podlech                              | Fabaceae | Podlech & Maassoumi (1987) Iran. J. Bot. 4(1) 71-90.             |
| 146 | <i>Astragalus meshkinensis</i> Podlech                                       | Fabaceae | Zarre et al. (2005) Feddes Repertorium 116(1-2) 54-79.           |
| 147 | <i>Astragalus montismishoudaghi</i> Sheikh Akbari Mehr, Ghorbani & Maassoumi | Fabaceae | Sheikh Akbari Mehr et al. (2011) Iran. J. Bot. 17(2) 178-180.    |
| 148 | <i>Astragalus montis-nacarouzii</i> Maassoumi & Maroofi                      | Fabaceae | Maassoumi & Maroofi (2006) Iran. J. Bot. 12(1) 92-93.            |

|     |                                                                           |          |                                                                                                                          |
|-----|---------------------------------------------------------------------------|----------|--------------------------------------------------------------------------------------------------------------------------|
| 149 | <i>Astragalus montis-parrowii</i> Maassoumi & Nemati                      | Fabaceae | Maassoumi (2005) Iran. J. Bot. 11(1) 101-109.                                                                            |
| 150 | <i>Astragalus montosus</i> Maassoumi                                      | Fabaceae | Maassoumi (2000) Iran. J. Bot. 8(2) 309-326.                                                                             |
| 151 | <i>Astragalus musaianus</i> Maassoumi & Joharchi                          | Fabaceae | Maassoumi et al. (2013) Rostaniha 14(1) 14-21.                                                                           |
| 152 | <i>Astragalus neoiranshahrii</i> Maassoumi & Amini Rad                    | Fabaceae | Maassoumi et al. Rostaniha 14(1) 14-21.                                                                                  |
| 153 | <i>Astragalus neomozaffarianii</i> Maassoumi                              | Fabaceae | Maassoumi (2000) Iran. J. Bot. 8(2) 309-326.                                                                             |
| 154 | <i>Astragalus nezva-montis</i> Podlech & Zarre                            | Fabaceae | Zarre et al. (2005) Feddes Repertorium 116(1-2) 54-79.                                                                   |
| 155 | <i>Astragalus nowroozii</i> Podlech & Zarre                               | Fabaceae | Podlech & Zarre (2003) Willdenowia 33 341-352.                                                                           |
| 156 | <i>Astragalus orientopersicus</i> F.Ghahrem., Joharchi, Fereid. & Hoseini | Fabaceae | Ghahremaninejad et al. (2016) 38(1) 29-33.<br>Podlech & Maassoumi (2003) Feddes Repertorium 114(5-6) 320-351.            |
| 157 | <i>Astragalus pakravaniae</i> Podlech & Maassoumi                         | Fabaceae | Maassoumi (2000) Iran. J. Bot. 8(2) 309-326.                                                                             |
| 158 | <i>Astragalus passargadensis</i> Maassoumi                                | Fabaceae | Maassoumi & Ghahremaninejad (1999) Iran. J. Bot. 8(1) 35-41.                                                             |
| 159 | <i>Astragalus pauxillis</i> Maassoumi & Ghahrem.                          | Fabaceae | Maassoumi & Ghahremaninejad (1999) Iran. J. Bot. 8(1) 35-41.                                                             |
| 160 | <i>Astragalus pereshkhoranicus</i> Maassoumi & F.Ghahrem.                 | Fabaceae | Maassoumi (2000) Iran. J. Bot. 8(2) 309-326.                                                                             |
| 161 | <i>Astragalus peymanii</i> Maassoumi                                      | Fabaceae | Podlech & Maassoumi (2003) Feddes Repertorium 114(5-6) 320-351.                                                          |
| 162 | <i>Astragalus pileh-khasehensis</i> Podlech & Maassoumi                   | Fabaceae | Podlech & Maassoumi (1987) Iran. J. Bot. 4(1) 71-90.                                                                     |
| 163 | <i>Astragalus plagiophacos</i> Maassoumi & Podlech                        | Fabaceae | Maassoumi (2000) Iran. J. Bot. 8(2) 309-326.                                                                             |
| 164 | <i>Astragalus polystachys</i> Maassoumi                                   | Fabaceae |                                                                                                                          |
| 165 | <i>Astragalus pseudocomosus</i> Maassoumi, F.Ghahrem. & Bagheri           | Fabaceae | Maassoumi et al. (2013) Rostaniha 14(1) 14-21.                                                                           |
| 166 | <i>Astragalus pseudojohannis</i> Maassoumi & Podlech                      | Fabaceae | Podlech & Maassoumi (1987) Iran. J. Bot. 3(2) 95-110.<br>Podlech & Maassoumi (2003) Feddes Repertorium 114(5-6) 320-351. |
| 167 | <i>Astragalus pseudorobustus</i> Podlech & Maassoumi                      | Fabaceae | Maassoumi (2005) Iran. J. Bot. 11(1) 101-109.                                                                            |
| 168 | <i>Astragalus qaratchaicus</i> Maassoumi, Ghahrem. & Javadi               | Fabaceae |                                                                                                                          |
| 169 | <i>Astragalus qeydarnabiensis</i> Bagheri, F.Ghahrem. & Maassoumi         | Fabaceae | Bagheri et al. (2011) Iran. J. Bot. 17(1) 15-19.                                                                         |
| 170 | <i>Astragalus qohestanicus</i> Nasseh & Maassoumi                         | Fabaceae | Nasseh et al (2010) Iran. J. Bot. 16(2) 221-224.                                                                         |
| 171 | <i>Astragalus qorvehensis</i> Podlech                                     | Fabaceae | Zarre et al. (2005) Feddes Repertorium 116(1-2) 54-79.                                                                   |
| 172 | <i>Astragalus razensis</i> Nasseh & Joharchi                              | Fabaceae | Nasseh & Joharchi (2009) Iran. J. Bot. 15(2) 154-156.<br>Podlech & Maassoumi (2003) Feddes Repertorium 114(5-6) 320-351. |
| 173 | <i>Astragalus reconditus</i> Podlech & Maassoumi                          | Fabaceae |                                                                                                                          |

|     |                                                          |          |                                                                                                                         |
|-----|----------------------------------------------------------|----------|-------------------------------------------------------------------------------------------------------------------------|
| 174 | <i>Astragalus remotispicatus</i> Bagheri & Maassoumi     | Fabaceae | Bagheri et al. (2016) 11(3) e0149726                                                                                    |
| 175 | <i>Astragalus repentinus</i> Ekici & Podlech             | Fabaceae | Zarre et al. (2005) Feddes Repertorium 116 (1-2) 54- 79.                                                                |
| 176 | <i>Astragalus reticulato-venosus</i> Maassoumi & Podlech | Fabaceae | Podlech & Maassoumi (1987) Iran. J. Bot. 3(2) 95-110.                                                                   |
| 177 | <i>Astragalus rubriphysa</i> Maassoumi & Khorrami        | Fabaceae | Maassoumi (2005) Iran. J. Bot. 11(1) 101-109.                                                                           |
| 178 | <i>Astragalus rubrocalycinus</i> Maassoumi & Podlech     | Fabaceae | Podlech & Maassoumi (1987) Iran. J. Bot. 4(1) 71-90.<br>Podlech & Maassoumi (2003) Feddes Repertorium 114(5-6) 320-351. |
| 179 | <i>Astragalus runemarkii</i> Maassoumi & Podlech         | Fabaceae | Podlech & Maassoumi (2003) Feddes Repertorium 114(5-6) 320-351.                                                         |
| 180 | <i>Astragalus sabetii</i> Podlech & Maassoumi            | Fabaceae | Podlech & Maassoumi (2003) Feddes Repertorium 114(5-6)320-351.                                                          |
| 181 | <i>Astragalus safavii</i> Podlech & Maassoumi            | Fabaceae | Podlech & Maassoumi (2003) Feddes Repertorium 114(5-6)320-351.                                                          |
| 182 | <i>Astragalus salavatabadensis</i> Podlech               | Fabaceae | Podlech (2009) Feddes Repertorium 120 486 58.<br>Podlech & Maassoumi (2003) Feddes Repertorium 114(5-6)3 20-351.        |
| 183 | <i>Astragalus sarabensis</i> Maassoumi & Podlech         | Fabaceae | Maassoumi (2002) Iran. J. Bot. 9(2) 121-125.                                                                            |
| 184 | <i>Astragalus saremii</i> Maassoumi                      | Fabaceae | Zarre et al. (2005) Feddes Repertorium 116 (1-2) 54- 79.                                                                |
| 185 | <i>Astragalus segregatus</i> Zarre & Podlech             | Fabaceae | Podlech & Maassoumi (2003) Feddes Repertorium 114(5-6) 320-351.                                                         |
| 186 | <i>Astragalus semiromensis</i> Podlech & Maassoumi       | Fabaceae | Zarre et al. (2005) Feddes Repertorium 116(1-2) 54-79.                                                                  |
| 187 | <i>Astragalus semitarius</i> Zarre & Podlech             | Fabaceae | Podlech & Maassoumi (2003) Feddes Repertorium 114(5-6) 320-351.                                                         |
| 188 | <i>Astragalus shabilensis</i> Podlech & Maassoumi        | Fabaceae | Podlech & Maassoumi (2003) Feddes Repertorium 114(5-6)320-351.                                                          |
| 189 | <i>Astragalus shahinii</i> Podlech & Maassoumi           | Fabaceae | Maassoumi & Podlech (2002) Iran. J. Bot. 9(2) 203-205.                                                                  |
| 190 | <i>Astragalus shahsavarii</i> Maassoumi & Podlech        | Fabaceae | Zarre et al. (2005) Feddes Repertorium 116(1-2) 54-79.                                                                  |
| 191 | <i>Astragalus shehbazii</i> Zarre & Podlech              | Fabaceae | Ranjbar et al. (2005) Willdenowia 35(1) 117-124.                                                                        |
| 192 | <i>Astragalus siahbishehensis</i> Rahimin. & Ranjbar     | Fabaceae | Podlech & Maassoumi (2003) Feddes Repertorium 114(5-6) 320-351.                                                         |
| 193 | <i>Astragalus siahcheshmehensis</i> Maassoumi & Podlech  | Fabaceae | Maassoumi (2005) Iran. J. Bot. 11(1) 101-109.                                                                           |
| 194 | <i>Astragalus simakanensis</i> Maassoumi & Hatami        | Fabaceae | Podlech & Maassoumi (2003) Feddes Repertorium 114(5-6) 320-351.                                                         |
| 195 | <i>Astragalus sisakhtianus</i> Podlech & Maassoumi       | Fabaceae | Podlech & Maassoumi (2003) Feddes Repertorium 114(5-6) 320-351.                                                         |
| 196 | <i>Astragalus sivendicus</i> Podlech & Maassoumi         | Fabaceae | Podlech & Maassoumi (2003) Feddes Repertorium 114(5-6) 320-351.                                                         |

|     |                                                                   |                |                                                                                                                      |
|-----|-------------------------------------------------------------------|----------------|----------------------------------------------------------------------------------------------------------------------|
| 197 | <i>Astragalus spachianiformis</i> Podlech & Maassoumi             | Fabaceae       | Podlech & Maassoumi (2003) Feddes Repertorium 114(5-6) 320-351.                                                      |
| 198 | <i>Astragalus strictissimus</i> Podlech & Zarre                   | Fabaceae       | Podlech & Zarre (2003) Willdenowia 33 341-352.                                                                       |
| 199 | <i>Astragalus subspadanus</i> Maassoumi, F.Ghahrem. & Bagheri     | Fabaceae       | Maassoumi et al. (2013) Rostaniha 14(1) 14-21.<br>Podlech & Maassoumi (2003) Feddes Repertorium 114(5-6) 320-351.    |
| 200 | <i>Astragalus subglaberrimus</i> Podlech & Maassoumi              | Fabaceae       |                                                                                                                      |
| 201 | <i>Astragalus subkohrudicus</i> Maassoumi, F.Ghahrem. & Bagheri   | Fabaceae       | Bagheri et al. (2011) Iran. J. Bot.17(1) 15-19.                                                                      |
| 202 | <i>Astragalus subrecognitus</i> Bagheri, Maassoumi & F.Ghahrem.   | Fabaceae       | Bagheri et al. (2011) Iran. J. Bot.17(1) 15-19.                                                                      |
| 203 | <i>Astragalus sumarensis</i> Maassoumi                            | Fabaceae       | Maassoumi (2000) Iran. J. Bot. 8(2) 309-326.                                                                         |
| 204 | <i>Astragalus taebiae</i> Zarre & Podlech                         | Fabaceae       | Zarre et al. (2005) Feddes Repertorium 116(1-2) 54-79.                                                               |
| 205 | <i>Astragalus tahbaziae</i> Zarre & Podlech                       | Fabaceae       | Zarre et al. (2005) Feddes Repertorium 116(1-2) 54-79.                                                               |
| 206 | <i>Astragalus taleshensis</i> Bidarlord, F.Ghahrem. & Maassoumi   | Fabaceae       | Bidarlord et al. (2016) Phytotaxa 252(4) 280-284.                                                                    |
| 207 | <i>Astragalus tenuiramosus</i> Podlech & Zarre                    | Fabaceae       | Podlech & Zarre (2003) Willdenowia 33 341-352.                                                                       |
| 208 | <i>Astragalus tenuissimus</i> Zarre & Podlech                     | Fabaceae       | Zarre et al. (2005) Feddes Repertorium 116(1-2) 54-79.                                                               |
| 209 | <i>Astragalus veiskaramii</i> Zarre, Podlech & Sabaii             | Fabaceae       | Sabaii et al. (2007) Willdenowia 37 297-304.                                                                         |
| 210 | <i>Astragalus vessalae</i> Maassoumi & Podlech                    | Fabaceae       | Podlech & Maassoumi (1987) Iran. J. Bot. 4(1) 71-90.                                                                 |
| 211 | <i>Astragalus vicinalis</i> Zarre & Podlech                       | Fabaceae       | Zarre et al. (2005) Feddes Repertorium 116(1-2) 54-79.                                                               |
| 212 | <i>Astragalus yezdii</i> (Vassilcz.) Podlech & Maassoumi          | Fabaceae       | Maassoumi (2013) Iran. J. Bot. 19(1) 1-28.                                                                           |
| 213 | <i>Astragalus zangoeianus</i> Maassoumi, Safavi & Nasseh          | Fabaceae       | Maassoumi et al. (2001) Iran. J. Bot. 9(1) 63-64.<br>Podlech & Maassoumi (2003) Feddes Repertorium 114(5-6) 320-351. |
| 214 | <i>Astragalus zanjanensis</i> Podlech & Maassoumi                 | Fabaceae       |                                                                                                                      |
| 215 | <i>Astragalus zourabadensis</i> Zarre & Podlech                   | Fabaceae       | Zarre et al. (2005) Feddes Repertorium 116(1-2) 54-79.                                                               |
| 216 | <i>Atractylis delvarii</i> Mozaff.                                | Asteraceae     | Mozaffarian (1996) Iran. J. Bot. 7(1) 127-142.                                                                       |
| 217 | <i>Atraphaxis binaludensis</i> S. Tavakkoli, Mozaff. & Kaz.Osaloo | Polygonaceae   | Tavakkoli et al. (2014) Iran. J. Bot. 20(1) 01-04.                                                                   |
| 218 | <i>Atraphaxis intricata</i> Mozaff.                               | Rubiaceae      | Mozaffarian (2006) Iran. J. Bot. 12(2) 107-113.                                                                      |
| 219 | <i>Bellevalia wendelboi</i> Maassoumi & Jafari                    | Asparagaceae   | Maassoumi & Jafari (2008) Edinb. J. Bot. 65 469-473.                                                                 |
| 220 | <i>Bienertia kavirense</i> Akhani                                 | Chenopodiaceae | Akhani et al. (2012) Plant Biosystems 146(3) 550-559.                                                                |
| 221 | <i>Bupleurum ghahremanii</i> Mozaff.                              | Apiaceae       | Mozaffarian (1991) Iran. J. Bot. 5(1) 29-39.                                                                         |
| 222 | <i>Bupleurum gilanicum</i> Mozaff.                                | Apiaceae       | Mozaffarian (2015) Iran. J. Bot. 21(1) 83-85.                                                                        |
| 223 | <i>Calligonum alatsetosum</i> Maassoumi & Kazempour               | Polygonaceae   | Maassoumi (2011) Iran. J. Bot. 17(1) 43-54.                                                                          |



|     |                                                              |                |                                                                                                                                                                             |
|-----|--------------------------------------------------------------|----------------|-----------------------------------------------------------------------------------------------------------------------------------------------------------------------------|
| 224 | <i>Calligonum spinosetosum</i> Maassoumi & Batooli           | Polygonaceae   | Maassoumi & Batooli (2009) Iran . J. Bot. 15(2) 153-153.                                                                                                                    |
| 225 | <i>Campanula kurdistanica</i> Advay & Marofi                 | Campanulaceae  | Advay & Marofi (2015) Iran. J. Bot. 21(1) 35-38.                                                                                                                            |
| 226 | <i>Centaurea ardabilica</i> Ranjbar & Heydari                | Asteraceae     | Ranjbar & Heydari (2015) Phytotaxa 201(1) 79-86.                                                                                                                            |
| 227 | <i>Centaurea elymaitica</i> Mozaff.                          | Rubiaceae      | Mozaffarian (2006) Iran. J. Bot. 12(2) 107-113.                                                                                                                             |
| 228 | <i>Centaurea kabirkuhensis</i> Mozaff., F.Ghahrem. & Fereid. | Asteraceae     | Mozaffarian (2012) Ann. Naturhist. Mus. Wien, B 114: 133-134; originally described as <i>C. procera</i> (nomen illegit.) in Mozaffarian (2010) Iran. J. Bot. 16(2) 204-212. |
| 229 | <i>Centaurea khuzistanica</i> Mozaff.                        | Asteraceae     | Mozaffarian (1992) Iran. J. Bot. 5(2) 83-90.                                                                                                                                |
| 230 | <i>Centaurea paradoxa</i> Mozaff.                            | Asteraceae     | Mozaffarian (1991) Iran. J. Bot. 5(1) 29-39.                                                                                                                                |
| 231 | <i>Centaurea rahiminejadii</i> Negaresh                      | Asteraceae     | Negaresh & Rahiminejad (2015) Nordic J. Bot. 34(1) 15-22.                                                                                                                   |
| 232 | <i>Centaurea ravansarensis</i> Ranjbar & Negaresh            | Asteraceae     | Ranjbar et al. (2013) Nordic J. Bot. 31(4) 430-436.                                                                                                                         |
| 233 | <i>Centaurea salmasensis</i> Ranjbar & Heydari               | Asteraceae     | Ranjbar & Heydari (2016) Phytotaxa 277(2) 182-190.                                                                                                                          |
| 234 | <i>Centaurea shahuensis</i> Ranjbar & Negaresh               | Asteraceae     | Ranjbar et al. (2013) Nordic J. Bot. 31(4) 430-436.                                                                                                                         |
| 235 | <i>Centaurea tabriziana</i> Ranjbar & Heydari                | Asteraceae     | Ranjbar & Heydari (2015) Phytotaxa 201(1) 79-86.                                                                                                                            |
| 236 | <i>Centaurea zagrosmontana</i> Ranjbar & Heydari             | Asteraceae     | Ranjbar & Heydari (2016) Phytotaxa 277(2) 182-190.                                                                                                                          |
| 237 | <i>Cephalaria bojnordensis</i> Ranjbar & Z.Ranjbar           | Dipsacaceae    | Ranjbar et al. (2014) Feddes Repertorium 124 116-121.                                                                                                                       |
| 238 | <i>Cerasus paradoxa</i> Dehshiri & Mozaff.                   | Rosaceae       | Dehshiri & Mozaffarian (2012) Iran. J. Bot. 18(2) 220-223.                                                                                                                  |
| 239 | <i>Clematis iranica</i> Habibi, Ghorbani & Azizian           | Ranunculaceae  | Habibi et al. (2014) Phytotaxa 16(2) 99-106.                                                                                                                                |
| 240 | <i>Colchicum bakhtiaricum</i> Matin & Iranshahr              | Liliaceae      | Matin & Iranshahr (2000) Iran. J. Bot. 8(2) 251-254.                                                                                                                        |
| 241 | <i>Convolvulus elymaiticus</i> Mozaff.                       | Convolvulaceae | Mozaffarian (2010) Iran. J. Bot. 16(2) 204-212.                                                                                                                             |
| 242 | <i>Convolvulus iranicus</i> J.R.I.Wood & Scotland            | Convolvulaceae | Wood et al. (2015) Phytokeys 51 1-282.                                                                                                                                      |
| 243 | <i>Corydalis firouzii</i> Wendelbo                           | Fumariaceae    | Wendelbo (1976) Iran. J. Bot. 1 61-62.                                                                                                                                      |
| 244 | <i>Cotoneaster assadii</i> Khat.                             | Rosaceae       | Khatamsaz (1988) Iran. J. Bot. 4(1) 111-125.                                                                                                                                |
| 245 | <i>Cotoneaster esfandiarii</i> Khat.                         | Rosaceae       | Khatamsaz (1991) Iran. J. Bot. 5(1) 1-5.                                                                                                                                    |
| 246 | <i>Cousinia argentea</i> Mehregan & Assadi                   | Asteraceae     | Mehregan & Assadi (2009) Willdenowia 39(2) 265-271.                                                                                                                         |
| 247 | <i>Cousinia assadii</i> Attar                                | Asteraceae     | Attar (2011) Iran. J. Bot. 17(2) 150-157.                                                                                                                                   |
| 248 | <i>Cousinia atrobracteata</i> Attar                          | Asteraceae     | Attar (2011) Iran. J. Bot. 17(2) 150-157.                                                                                                                                   |
| 249 | <i>Cousinia attariae</i> Assadi & Joharchi                   | Asteraceae     | Assadi (2010) Iran. J. Bot. 16(2) 191-196.                                                                                                                                  |
| 250 | <i>Cousinia azerbaijanica</i> Djavadi, Attar & Najafi        | Asteraceae     | Djavadi et al. (2007) Iran. J. Bot. 13(1) 43-46.                                                                                                                            |

|     |                                                          |            |                                                             |
|-----|----------------------------------------------------------|------------|-------------------------------------------------------------|
| 251 | <i>Cousinia barezica</i> Assadi                          | Asteraceae | Assadi (2009) Iran. J. Bot. 15(1) 36-44.                    |
| 252 | <i>Cousinia bazoftensis</i> Attar                        | Asteraceae | Attar (2011) Iran. J. Bot. 17(2) 150-157.                   |
| 253 | <i>Cousinia brevicaulis</i> Attar, Mozaff. & Mirtadz.    | Asteraceae | Attar et al. (2016) Nordic. J. Bot. 34(2) 174-177.          |
| 254 | <i>Cousinia cordifolia</i> Djavadi & Attar               | Asteraceae | Djavadi & Attar. (2006) Feddes Repertorium 117 4536458.     |
| 255 | <i>Cousinia curvibracteata</i> Mehregan                  | Asteraceae | Mehregan (2011) Iran J. Bot. 17(2) 137-149.                 |
| 256 | <i>Cousinia dalahuensis</i> Attar & Ghahr.               | Asteraceae | Attar & Ghahreman (2011) Iran. J. Bot. 8(2) 259-269.        |
| 257 | <i>Cousinia farimanensis</i> Assadi                      | Asteraceae | Assadi (2011) Iran. J. Bot. 17(1) 6-9.                      |
| 258 | <i>Cousinia gatchsaranica</i> Mehregan, Assadi & Attar   | Asteraceae | Mehregan et al. (2003) Willdenowia 33 107-111.              |
| 259 | <i>Cousinia ghahremanii</i> Mirtadz. & Attar             | Asteraceae | Attar & Mirtadzadini (2009) Iran. J. Bot. 15(2) 146-152.    |
| 260 | <i>Cousinia hazarensis</i> Mirtadz. & Attar              | Asteraceae | Mirtadzadini & Attar (2004) Willdenowia 34 191-194.         |
| 261 | <i>Cousinia iranshahriana</i> Attar & Maroofi            | Asteraceae | Attar & Maroofi (2010) Iran. J. Bot. 16(1) 197-199.         |
| 262 | <i>Cousinia isfahanica</i> Assadi                        | Asteraceae | Assadi (2009) Iran. J. Bot. 15 (1) 36-44.                   |
| 263 | <i>Cousinia joharchii</i> Assadi & Mehregan              | Asteraceae | Mehregan & Assadi (2016) Phytotaxa 257(3) 271-279.          |
| 264 | <i>Cousinia karkasensis</i> Mehregan & Djavadi           | Asteraceae | Mehregan et al. (2010) Iran. J. Bot. 16(2) 200-203.         |
| 265 | <i>Cousinia kermanshahensis</i> Attar, Ghahr. & Assadi   | Asteraceae | Attar et al. (2001) Iran. J. Bot. 9(1) 55-62.               |
| 266 | <i>Cousinia khorasanica</i> Djavadi & Attar              | Asteraceae | Attar et al. (2006) Rostaniha. 7(suppl.2) 165-175.          |
| 267 | <i>Cousinia komidjanensis</i> Mehregan                   | Asteraceae | Mehregan (2011) Iran J. Bot. 17(2) 137-149.                 |
| 268 | <i>Cousinia longibracteata</i> Attar & Mirtadz.          | Asteraceae | Attar & Mirtadzadini (2009) Iran. J. Bot. 15(2) 146-152.    |
| 269 | <i>Cousinia maassoumii</i> Assadi                        | Asteraceae | Assadi (2009) Iran. J. Bot. 15 (1) 36-44.                   |
| 270 | <i>Cousinia mehreganii</i> Assadi                        | Asteraceae | Assadi (2011) Iran. J. Bot. 17(1) 6-9.                      |
| 271 | <i>Cousinia mobayenii</i> Ghahr. & Attar                 | Asteraceae | Attar & Ghahreman (2011) Iran. J. Bot. 8(2) 259-269.        |
| 272 | <i>Cousinia mozdouranensis</i> Djavadi & Attar           | Asteraceae | Djavadi & Attar (2005) Feddes Repertorium 116(5-6) 2856289. |
| 273 | <i>Cousinia nujianensis</i> Attar, Ghahr., Saber & Zarre | Asteraceae | Attar et al. (2005) Iran. J. Bot. 11(1) 65-69.              |
| 274 | <i>Cousinia oshtorankuhensis</i> Attar                   | Asteraceae | Attar (2011) Iran. J. Bot. 17(2) 150-157.                   |
| 275 | <i>Cousinia papillosa</i> Djavadi & Attar                | Asteraceae | Djavadi et al. (2007) Rostaniha 8(2) 65-73.                 |
| 276 | <i>Cousinia parsana</i> Ghahr., Iranshahr & Attar        | Asteraceae | Ghahreman et al. (1999) Iran. J. Bot. 8(1) 15-22.           |
| 277 | <i>Cousinia persica</i> Djavadi & Attar                  | Asteraceae | Djavadi & Attar. (2006) Feddes Repertorium 117 4536458.     |
| 278 | <i>Cousinia pseudocandolleana</i> Assadi                 | Asteraceae | Assadi (2009) Iran. J. Bot. 15 (1) 36-44.                   |
| 279 | <i>Cousinia saloukensis</i> Mehregan                     | Asteraceae | Mehregan (2011) Willdenowia 41 2616265.                     |

|     |                                                       |                  |                                                         |
|-----|-------------------------------------------------------|------------------|---------------------------------------------------------|
| 280 | <i>Cousinia shebliensis</i> Ghahr., Iranshahr & Attar | Asteraceae       | Ghahreman et al. (1999) Iran. J. Bot. 8(1) 15-22.       |
| 281 | <i>Cousinia shulabadensis</i> Attar & Ghahr.          | Asteraceae       | Attar & Ghahreman (2002) Iran. J. Bot. 9(2) 161-169.    |
| 282 | <i>Cousinia subpectinata</i> Mirtadz., Attar & Assadi | Asteraceae       | Mirtadzadini et al. (2004) Iran. J. Bot. 10(2) 143-146. |
| 283 | <i>Cousinia taybadensis</i> Djavadi & Attar           | Asteraceae       | Djavadi et al. (2006) Rostaniha 7(suppl.2) 165-175.     |
| 284 | <i>Cousinia yasujensis</i> Attar                      | Asteraceae       | Attar (2011) Iran. J. Bot. 17(2) 150-157.               |
| 285 | <i>Cousinia zardkuhensis</i> Attar & Ghahr.           | Asteraceae       | Attar & Ghahreman (2002) Iran. J. Bot. 9(2) 161-169.    |
| 286 | <i>Crataegus aminii</i> Khat.                         | Rosaceae         | Khatamsaz (1991) Iran. J. Bot. 5(1) 47-56.              |
| 287 | <i>Crataegus assadii</i> Khat.                        | Rosaceae         | Khatamsaz (1991) Iran. J. Bot. 5(1) 47-56.              |
| 288 | <i>Crataegus babakhanloui</i> Khat.                   | Rosaceae         | Khatamsaz (1991) Iran. J. Bot. 5(1) 47-56.              |
| 289 | <i>Crataegus zagrica</i> Khat.                        | Rosaceae         | Khatamsaz (2000) Iran. J. Bot. 8(2) 181-186.            |
| 290 | <i>Crocus gunae</i> Ruk- ns                           | Iridaceae        | Ruksans (2015) Int. Rock Gard. 61 1-26.                 |
| 291 | <i>Crocus iranicus</i> Ruk- ns                        | Iridaceae        | Ruksans (2015) Int. Rock Gard. 61 1-26.                 |
| 292 | <i>Crocus reinhardii</i> Ruk- ns                      | Iridaceae        | Ruksans (2015) Int. Rock Gard. 61 1-26.                 |
| 293 | <i>Crotalaria assadii</i> Zaeifi                      | Fabaceae         | Zaeifi (2015) Iran. J. Bot. 21(2) 91-93.                |
| 294 | <i>Cymbalaria bakhtiarica</i> Podlech & Iranshahr     | Scrophulariaceae | Podlech & Iranshahr (2015) Fl. Iranica 180 1-125.       |
| 295 | <i>Cynoglossum semnanicum</i> Khat.                   | Boraginaceae     | Khatamsaz (1999) Iran. J. Bot. 8(1) 1-8.                |
| 296 | <i>Dianthus denaicus</i> Assadi                       | Caryophyllaceae  | Assadi (1985) Iran. J. Bot. 3(1) 9-45.                  |
| 297 | <i>Dianthus diversifolius</i> Assadi                  | Caryophyllaceae  | Assadi (1985) Iran. J. Bot. 3(1) 9-45.                  |
| 298 | <i>Dianthus hafezii</i> Assadi                        | Caryophyllaceae  | Assadi (1985) Iran. J. Bot. 3(1) 9-45.                  |
| 299 | <i>Dianthus pseudocrinitus</i> Behrooz. & Joharchi    | Caryophyllaceae  | Vaezi et al. (2014) Phytotaxa 156(2) 59-73.             |
| 300 | <i>Dianthus rudbaricus</i> Assadi                     | Caryophyllaceae  | Assadi (1985) Iran. J. Bot. 3(1) 9-45.                  |
| 301 | <i>Dianthus sahandicus</i> Assadi                     | Caryophyllaceae  | Assadi (1985) Iran. J. Bot. 3(1) 9-45.                  |
| 302 | <i>Dionysia archibaldii</i> Wendelbo                  | Primulaceae      | Wendelbo (1976) Bot. Bot. 120(2) 144-148.               |
| 303 | <i>Dionysia assadii</i> Borjian                       | Primulaceae      | Borjian et al. (2014) Nordic J. Bot. 32 7176722.        |
| 304 | <i>Dionysia aubrietiioides</i> Jamzad & Mozaff.       | Primulaceae      | Jamzad (1996) Iran. J. Bot. 7(1) 15-30.                 |
| 305 | <i>Dionysia bazoftica</i> Jamzad                      | Primulaceae      | Jamzad (1996) Iran. J. Bot. 7(1) 15-30.                 |
| 306 | <i>Dionysia cristagalli</i> Lidén                     | Primulaceae      | Liden (2007) Willdenowia 37(1) 37-61.                   |
| 307 | <i>Dionysia esfandiarii</i> Wendelbo                  | Primulaceae      | Wendelbo (1970) Not. Bot. 123(2) 300-309.               |
| 308 | <i>Dionysia iranica</i> Jamzad                        | Primulaceae      | Jamzad (1996) Iran. J. Bot. 7(1) 15-30.                 |

|     |                                             |              |                                                                |
|-----|---------------------------------------------|--------------|----------------------------------------------------------------|
| 309 | <i>Dionysia iranshahrii</i> Wendelbo        | Primulaceae  | Wendelbo (1976) Iran. J. Bot. 1 71-73.                         |
| 310 | <i>Dionysia khatamii</i> Mozaff.            | Primulaceae  | Mozaffarian (2002) Pakistan J. Bot. 34(3) 391-396.             |
| 311 | <i>Dionysia khuzistanica</i> Jamzad         | Primulaceae  | Jamzad (1996) Iran. J. Bot. 7(1) 15-30.                        |
| 312 | <i>Dionysia mozaffarianii</i> Lidén         | Primulaceae  | Liden (2000) Iran. J. Bot. 8(2) 303-308.                       |
| 313 | <i>Dionysia robusta</i> Younesi             | Primulaceae  | Younesi et al. (2015) Willdenowia 46(1) 105-112.               |
| 314 | <i>Dionysia tacamahaca</i> Lidén            | Primulaceae  | Liden (2007) Willdenowia 37(1) 37-61.                          |
| 315 | <i>Dionysia termeana</i> Wendelbo           | Primulaceae  | Wendelbo (1970) Not. Bot. 123(2) 300-309.                      |
| 316 | <i>Dionysia viva</i> Lidén & Zetterl.       | Primulaceae  | Liden (2007) Willdenowia 37(1) 37-61.                          |
| 317 | <i>Dionysia zagrica</i> Grey-Wilson         | Primulaceae  | Grey-Wilson (1974) Kew Bulletin 29(4) 687-694.                 |
| 318 | <i>Dionysia zetterlundii</i> Lidén          | Primulaceae  | Liden (2007) Willdenowia 37(1) 37-61.                          |
| 319 | <i>Dionysia zschummelii</i> Lidén           | Primulaceae  | Liden (2007) Willdenowia 37(1) 37-61.                          |
| 320 | <i>Dracocephalum ghahremanii</i> Jamzad     | Lamiaceae    | Jamzad (2012) Lamiaceae (in) Assadi et al. Fl. Iran 76 1-1068. |
| 321 | <i>Echinops abazariae</i> Mozaff.           | Asteraceae   | Mozaffarian (2006) Iran. J. Bot. 11(2) 197-239.                |
| 322 | <i>Echinops austro-iranicus</i> Mozaff.     | Asteraceae   | Mozaffarian (2006) Iran. J. Bot. 11(2) 197-239.                |
| 323 | <i>Echinops avajensis</i> Mozaff.           | Asteraceae   | Mozaffarian (2006) Iran. J. Bot. 11(2) 197-239.                |
| 324 | <i>Echinops barezicus</i> Montaz. & Mozaff. | Asteraceae   | montazerolghaem et al. (2016) Phytotaxa 263(2) 81-97.          |
| 325 | <i>Echinops delicatus</i> Mozaff.           | Asteraceae   | Mozaffarian (2006) Iran. J. Bot. 11(2) 197-239.                |
| 326 | <i>Echinops kazerunensis</i> Mozaff.        | Asteraceae   | Mozaffarian (2006) Iran. J. Bot. 11(2) 197-239.                |
| 327 | <i>Echinops kermanshahanicus</i> Mozaff.    | Asteraceae   | Mozaffarian (2006) Iran. J. Bot. 11(2) 197-239.                |
| 328 | <i>Echinops khansaricus</i> Mozaff.         | Asteraceae   | Mozaffarian (2006) Iran. J. Bot. 11(2) 197-239.                |
| 329 | <i>Echinops khuzistanicus</i> Mozaff.       | Asteraceae   | Mozaffarian (2006) Iran. J. Bot. 11(2) 197-239.                |
| 330 | <i>Echinops laricus</i> Mozaff.             | Asteraceae   | Mozaffarian (2006) Iran. J. Bot. 11(2) 197-239.                |
| 331 | <i>Echinops leiopolyceroides</i> Mozaff.    | Asteraceae   | Mozaffarian (2006) Iran. J. Bot. 11(2) 197-239.                |
| 332 | <i>Echinops psammophilus</i> Mozaff.        | Asteraceae   | Mozaffarian (2006) Iran. J. Bot. 11(2) 197-239.                |
| 333 | <i>Echinops quercetorum</i> Mozaff.         | Asteraceae   | Mozaffarian (2008) Iran. J. Bot. 14(2) 87-94.                  |
| 334 | <i>Echinops sabzevarensis</i> Mozaff.       | Asteraceae   | Mozaffarian (2006) Iran. J. Bot. 11(2) 197-239.                |
| 335 | <i>Echinops shulabadensis</i> Mozaff.       | Asteraceae   | Mozaffarian (2006) Iran. J. Bot. 11(2) 197-239.                |
| 336 | <i>Echinops viscidulus</i> Mozaff.          | Asteraceae   | Mozaffarian (2006) Iran. J. Bot. 11(2) 197-239.                |
| 337 | <i>Echium khuzistanicum</i> Mozaff.         | Boraginaceae | Mozaffarian (1994) Iran. J. Bot. 6(2) 235-243.                 |

|     |                                                            |                 |                                                                                                                      |
|-----|------------------------------------------------------------|-----------------|----------------------------------------------------------------------------------------------------------------------|
| 338 | <i>Elymus zagricus</i> Assadi                              | Poaceae         | Assadi (1994) Iran. J. Bot. 6(2) 185-195.                                                                            |
| 339 | <i>Eminium jaegeri</i> Bogner & P.C.Boyce                  | Araceae         | Bonger & Boyce (2008) Willdenowia 38 149-153.                                                                        |
| 340 | <i>Ephedra laristanica</i> Assadi                          | Ephedraceae     | Assadi (1996) Iran. J. Bot. 7(1) 1-6.                                                                                |
| 341 | <i>Eremostachys lanata</i> Jamzad                          | Lamiaceae       | Jamzad (1987) Iran. J. Bot. 3(2) 111-116.                                                                            |
| 342 | <i>Eryngium iranicum</i> Mozaff.                           | Apiaceae        | Mozaffarian (2013) Rostaniha 14(1) 36-42.                                                                            |
| 343 | <i>Erysimum elymaiticum</i> Mozaff.                        | Asteraceae      | Mozaffarian (2008) Iran. J. Bot. 14 (2) 87-94.                                                                       |
| 344 | <i>Erysimum hezarensense</i> Moazzeni                      | Brassicaceae    | Moazzeni et al. (2014) Phytotaxa 175(5) 2416248.                                                                     |
| 345 | <i>Erysimum polatschekii</i> Moazzeni, Assadi & Al-Shehbaz | Brassicaceae    | Moazzeni et al. (2016) Phytotaxa 269(1) 0476053.                                                                     |
| 346 | <i>Euphorbia acanthodes</i> Akhani                         | Euphorbiaceae   | Akhani (2004) Bot. j. Linn. Soc. 146 1076121.                                                                        |
| 347 | <i>Euphorbia ferdowsiana</i> Pahlevani                     | Euphorbiaceae   | Pahlevani (2015) Bot. J. Linn. Soc. 177(3) 3356377.                                                                  |
| 348 | <i>Euphorbia gorenflotii</i> Mobayen                       | Euphorbiaceae   | Mobayen (1984) Iran. J. Bot. 2(2) 159-166.                                                                           |
| 349 | <i>Euphorbia iranshahrii</i> Pahlevani                     | Euphorbiaceae   | Pahlevani & Mozaffarian (2011) Adansonia 33(1) 93-99.<br>Mehrvarz & Ghayormand (2015) Ann. Bot. Fenn. 52(1-2) 38-42. |
| 350 | <i>Euphorbia khorasanica</i> Saeidi & Ghayorm.             | Euphorbiaceae   | Pahlevani & Riina (2014) Nordic J. Bot. 32(3) 2576278.                                                               |
| 351 | <i>Euphorbia mazandaranica</i> Pahlevani                   | Euphorbiaceae   | Mobayen (1984) Iran. J. Bot. 2(2) 159-166.                                                                           |
| 352 | <i>Euphorbia spartiformis</i> Mobayen                      | Euphorbiaceae   | Pahlevani (2015) Bot. J. Linn. Soc. 177(3) 3356377.                                                                  |
| 353 | <i>Euphorbia sulphurea</i> Pahlevani                       | Euphorbiaceae   | Kavousi (2001) Iran. J. Bot. 9(1) 47-54.                                                                             |
| 354 | <i>Farsetia assadii</i> Kavousi                            | Brassicaceae    | Ajani & Ajani (2008) Edinb. J. Bot. 65(3) 425-431.                                                                   |
| 355 | <i>Ferula hezarlalehzarica</i> Ajani                       | Apiaceae        | Advay et al. (2015) nordic. J. Bot. 33(5) 5266531.                                                                   |
| 356 | <i>Fritillaria avromanica</i> Advay & Tek en               | Liliaceae       | Zarrei et al. (2010) Kew Bulletin 65 89-96.                                                                          |
| 357 | <i>Gagea calcicola</i> Zarrei & Wilkin                     | Liliaceae       | Zarrei et al. (2010) Kew Bulletin 65 327-336.                                                                        |
| 358 | <i>Gagea robusta</i> Zarrei & Wilkin                       | Liliaceae       | Yusef Naanaie & Assadi (2011) Iran. J. Bot. 17(2) 227-229.                                                           |
| 359 | <i>Gaillonia dezfulensis</i> Naanaie & Assadi              | Rubiaceae       | Moussavi et al. (1993) Iran. J. Bot. 6(1) 145-147.                                                                   |
| 360 | <i>Galium tehranicum</i> Moussavi, Ghahr. & Attar          | Rubiaceae       | Khatamsaz (1987) Iran. J. Bot. 3(2) 89-94.                                                                           |
| 361 | <i>Geum iranicum</i> Khat.                                 | Rosaceae        | Mobayen (1984) Iran. J. Bot. 2(2) 159-166.                                                                           |
| 362 | <i>Glaucium elegantissimum</i> Mobayen                     | Papaveraceae    | Gran & Sharifnia (2008) Iran. J. Bot. 14(1) 23-38.                                                                   |
| 363 | <i>Glaucium golestanicum</i> A.Gran & Sharifnia            | Papaveraceae    | Mobayen (1984) Iran. J. Bot. 2(2) 159-166.                                                                           |
| 364 | <i>Glaucium mathiolifolium</i> Mobayen                     | Papaveraceae    | Falatoury et al. (2015) Phytotaxa 222(4) 276-282.                                                                    |
| 365 | <i>Gypsophila alvandica</i> Falat., F.Ghahrem. & Assadi    | Caryophyllaceae |                                                                                                                      |

- 366 *Gypsophila elymaitica* Mozaff. Caryophyllaceae Mozaffarian (2008) Iran. J. Bot. 14(2) 87-94.
- 367 *Gypsophila pseudopallida* Falat., Assadi & F.Ghahrem. Caryophyllaceae Falatoury et al. (2016) Phytom 56(1) 1-13.
- 368 *Gypsophila rupestris* Mozaff. Caryophyllaceae Mozaffarian (1991) Iran. J. Bot. 5(1) 29-39.
- 369 *Gypsophila yazdiana* Falat., F.Ghahrem. & Assadi Caryophyllaceae Falatoury (2016) Novon 24(4) 347-351.
- 370 *Halanthium alae flavum* Assadi Amaranthaceae Assadi (1992) Iran. J. Bot. 5(2) 57-63.
- 371 *Halotis pedunculata* Assadi Amaranthaceae Assadi (1992) Iran. J. Bot. 5(2) 57-63.
- 372 *Haplophyllum bakhteganicum* Soltani & Khosravi Rutaceae Soltani & Khosravi (2005) Willdenowia 35 293-298.
- 373 *Hedysarum al-shehbazii* Ranjbar Fabaceae Ranjbar et al. (2007) Bot. J. Linn. Soc. 155 505-512.
- 374 *Hedysarum gypsophilum* Dehshiri Fabaceae Dehshiri & Goodarzi (2016) Ann. Bot. Fenn. 53(162) 21-26.
- 375 *Hedysarum marandense* Mozaff. Fabaceae Akrami et al. (2011) Iran. J. Bot. 17(1) 20-23.
- 376 *Hedysarum neyshaboricum* Ranjbar Fabaceae Ranjbar (2010) Novon 20(3) 329-333.
- 377 *Hedysarum orumiehense* Ranjbar Fabaceae Ranjbar (2010) Novon 20(3) 329-333.
- 378 *Hedysarum persicum* Bidarlord, F.Ghahrem. & Mozaff. Fabaceae Bidarlord et al. (2015) Phytotaxa 234(3) 294-298.
- 379 *Heliotropium esfahanicum* Khat. Boraginaceae Khatamsaz (2000) Iran. J. Bot. 8(2) 181-186.
- 380 *Heliotropium khayyamii* Akhani Boraginaceae Akhani et al. (2016) Phytotaxa 249(1) 159-180.
- 381 *Heliotropium shirazicum* Mozaff. Rubiaceae Mozaffarian (2006) Iran. J. Bot. 12(2) 107-113.
- 382 *Heliotropium ziegleri* Akhani Boraginaceae Akhani (2007) Bot. j. Linn. Soc. 155(3) 401-425.
- 383 *Heteroderis pusilla* (Boiss.) Boiss. Asteraceae Nasseh (2010) Iran. J. Bot. 16(1) 91-95.
- 384 *Hieracium piranshahricum* Tavakkoli & Assadi Asteraceae Tavakkoli & Assadi (2005) Iran. J. Bot. 11(1) 59-63.
- 385 *Hyoscyamus bornmulleri* Khat. Solanaceae Ghahreman & khatamsaz (1996) Iran. J. Bot. 7(1) 31-37.
- 386 *Hypericum dogonbadanicum* Assadi Acanthaceae Assadi (1984) Iran. J. Bot. 2(2) 83-93.
- 387 *Indigofera sinuspersica* Mozaff. Fabaceae Mozaffarian (1996) Iran. J. Bot. 7(1) 127-142.
- 388 *Jurinea cartilaginea* Mozaff. Asteraceae Mozaffarian (1988) Iran. J. Bot. 4(1) 61-70.
- 389 *Jurinea mobayenii* Ghahr. & Mirtadz. Asteraceae Ghahreman & Mirtadzadini (2000) Iran. J. Bot. 8(2) 245-250.
- 390 *Klasea nana* Ranjbar & Negaresh Asteraceae Ranjbar et al. (2012) Ann. Bot. Fenn. 49 402-406.
- 391 *Lactuca birjandica* Mozaff. Asteraceae Mozaffarian (2015) Iran. J. Bot. 21(1) 24-29.
- 392 *Lactuca denaensis* N. Kilian & Djavadi Asteraceae kilian et al. (2012) Phytokeys 11 61677.
- 393 *Lactuca gilanica* Mozaff. Asteraceae Mozaffarian (2015) Iran. J. Bot. 21(1) 24-29.
- 394 *Lactuca hazaranensis* Djavadi & N. Kilian Asteraceae kilian et al. (2012) Phytokeys 11 61677.

|     |                                                                      |                  |                                                                      |
|-----|----------------------------------------------------------------------|------------------|----------------------------------------------------------------------|
| 395 | <i>Lagochilus lorestanicus</i> Dehshiri & Mozaff.                    | Lamiaceae        | Dehshiri & Mozaffarian (2013) <i>Nordic J. Bot.</i> 31 278-281.      |
| 396 | <i>Lagochilus quadridentatus</i> Jamzad                              | Lamiaceae        | Jamzad (1988) <i>Iran. J. Bot.</i> 4(1) 91-103.                      |
| 397 | <i>Laser rechingeri</i> Akhani                                       | Apiaceae         | Akhani (1996) <i>Ann. Naturhist. Mus. Wien</i> 98(B) 97-105.         |
| 398 | <i>Lathyrus alamutensis</i> Mozaff., Ahavazi & Charkhch.             | Fabaceae         | Mozaffarian et al. (2008) <i>Iran. J. Bot.</i> 14(1) 7-9.            |
| 399 | <i>Linaria azerbaijanensis</i> Hamdi & Assadi                        | Scrophulariaceae | Hamdi et al. (2008) <i>Bot. J. Linn. Soc.</i> 158 7346742.           |
| 400 | <i>Linaria boushehrensensis</i> Hamdi & Assadi                       | Scrophulariaceae | Hamdi et al. (2008) <i>Iran. J. Bot.</i> 14 (1) 16-22.               |
| 401 | <i>Linaria golestanensis</i> Hamdi & Assadi                          | Scrophulariaceae | Hamdi et al. (2006) <i>Iran. J. Bot.</i> 11(2) 251-258.              |
| 402 | <i>Linaria guilanensis</i> Hamdi & Assadi                            | Scrophulariaceae | Hamdi & Assadi (2006) <i>Feddes Repertorium</i> 117 501-507.         |
| 403 | <i>Linaria iranica</i> Hamdi & Assadi                                | Scrophulariaceae | Hamdi & Assadi (2008) <i>Novon</i> 18(3) 340-343.                    |
| 404 | <i>Linaria karajensis</i> Hamdi & Assadi                             | Scrophulariaceae | Hamdi et al. (2005) <i>Iran. J. Bot.</i> 11(1) 79-83.                |
| 405 | <i>Linaria khorasanensis</i> Hamdi & Assadi                          | Scrophulariaceae | Hamdi et al. (2005) <i>Willdenowia</i> 35(2) 299-304.                |
| 406 | <i>Linaria mazandaranensis</i> Hamdi & Assadi                        | Scrophulariaceae | Hamdi et al. (2006) <i>Iran. J. Bot.</i> 11(2) 251-258.              |
| 407 | <i>Linaria Shahroudensis</i> Hamdi & Assadi                          | Scrophulariaceae | Hamdi et al. (2008) <i>Bot. J. Linn. Soc.</i> 158 7346742.           |
| 408 | <i>Matthiola iranica</i> Zeraatkar, Mahmoodi, F.Ghahrem. & Maassoumi | Brassicaceae     | Mahmoodi et al. (2016) <i>Phytotaxa</i> 261(2) 194-198.              |
| 409 | <i>Matthiola shehbazii</i> Ranjbar & Karami                          | Brassicaceae     | Ranjbar & Karami (2014) <i>Nordic J. Bot.</i> 32(6) 713-716.         |
| 410 | <i>Mentha mozaffarianii</i> Jamzad                                   | Lamiaceae        | Jamzad (1987) <i>Iran. J. Bot.</i> 3(2) 111-116.                     |
| 411 | <i>Milium atropatanum</i> Maroofi                                    | Poaceae          | Maroofi (2011) <i>Iran. J. Bot.</i> 17 (1) 10-14.                    |
| 412 | <i>Minuartia khorassanica</i> Assadi & Mostafavi                     | Caryophyllaceae  | Mostafavi et al. (2012) <i>Feddes Repertorium</i> 122(3-4) 309-318.  |
| 413 | <i>Minuartia sabalanica</i> Assadi & Mostafavi                       | Caryophyllaceae  | Mostafavi et al. (2011) <i>Iran. J. Bot.</i> 17(2) 220-226.          |
| 414 | <i>Muscari kurdicum</i> Maroofi                                      | Liliaceae        | Maroofi (2007) <i>Iran. J. Bot.</i> 13(2) 75-77.                     |
| 415 | <i>Myopordon damavandica</i> Mozaff.                                 | Asteraceae       | Mozaffarian (1991) <i>Iran. J. Bot.</i> 5(1) 29-39.                  |
| 416 | <i>Nanorrhinum baluchestanicum</i> Naanaie, Assadi & Tavassoli       | Scrophulariaceae | Yusef Naanaie & Tavassoli (2010) <i>Iran. J. Bot.</i> 16(1) 114-124. |
| 417 | <i>Nanorrhinum khuzestanicum</i> Naanaie, Assadi & Tavassoli         | Scrophulariaceae | Yusef Naanaie & Tavassoli (2010) <i>Iran. J. Bot.</i> 16(1) 114-124. |
| 418 | <i>Nepeta assadii</i> Jamzad                                         | Lamiaceae        | Jamzad (1991) <i>Iran. J. Bot.</i> 5(2) 69-74.                       |
| 419 | <i>Nepeta bazoftica</i> Jamzad                                       | Lamiaceae        | Jamzad (2009) <i>Iran. J. Bot.</i> 15(2) 141-145.                    |
| 420 | <i>Nepeta binaloudensis</i> Jamzad                                   | Lamiaceae        | Jamzad (1991) <i>Iran. J. Bot.</i> 5(1) 17-27.                       |
| 421 | <i>Nepeta bokhonica</i> Jamzad                                       | Lamiaceae        | Jamzad (1999) <i>Iran. J. Bot.</i> 8(1) 43-48.                       |
| 422 | <i>Nepeta makuensis</i> Jamzad & Mozaff.                             | Lamiaceae        | Jamzad (1998) <i>Iran. J. Bot.</i> 7(2) 249-253.                     |

|     |                                                               |               |                                                                                                                                       |
|-----|---------------------------------------------------------------|---------------|---------------------------------------------------------------------------------------------------------------------------------------|
| 423 | <i>Nepeta minuticephala</i> Jamzad                            | Lamiaceae     | Jamzad (1999) Iran. J. Bot. 8(1) 43-48.                                                                                               |
| 424 | <i>Nepeta natanzensis</i> Jamzad                              | Lamiaceae     | Jamzad (2006) Iran. J. Bot. 11(2) 143-148.                                                                                            |
| 425 | <i>Nepeta pogonosperma</i> Jamzad & Assadi                    | Lamiaceae     | Jamzad & Assadi (1984) Iran. J. Bot. 2(2) 95-102.                                                                                     |
| 426 | <i>Nepeta sahandica</i> Noroozi & Ajani                       | Lamiaceae     | Noroozi & Ajani (2013) Novon 22(3) 297-303.                                                                                           |
| 427 | <i>Nepeta shahmirzadensis</i> Assadi & Jamzad                 | Lamiaceae     | Jamzad & Assadi (1984) Iran. J. Bot. 2(2) 95-102.                                                                                     |
| 428 | <i>Nonea iranica</i> Falat. & Pakravan                        | Boraginaceae  | Falatoury et al. (2011) Feddes Repertorium 122 1-8.                                                                                   |
| 429 | <i>Onobrychis alamutensis</i> Amirahm., Kaz.Osaloo, Charkhch. | Fabaceae      | Amirahmadi et al. (2014) Turk. J. Bot. 38 658-664.                                                                                    |
| 430 | <i>Onobrychis aurea</i> Ranjbar, Amirab. & Ghahrem.           | Fabaceae      | Ranjbar et al. (2004) Willdenowia. 34 187-190.                                                                                        |
| 431 | <i>Onobrychis iranensis</i> Amirab. & Ghanavati               | Fabaceae      | Amirabadizadeh et al. (2009) Iran. J. Bot. 15(1) 45-50.                                                                               |
| 432 | <i>Onobrychis marandensis</i> Amirab. & Ghanavati             | Fabaceae      | Amirabadizadeh et al. (2012) Iran. J. Bot. 18(1) 55-58.                                                                               |
| 433 | <i>Onobrychis mozaffarianii</i> Amirab.                       | Fabaceae      | Amirabadizadeh et al. (2007) Iran. J. Bot. 13(1) 53-56.                                                                               |
| 434 | <i>Onosma azarбайдjanensis</i> Mehrabian                      | Boraginaceae  | Mehrabian et al. (2014) Feddes Repertorium 124 69679.                                                                                 |
| 435 | <i>Onosma ghahremanii</i> Attar & Naqinezhad                  | Boraginaceae  | Naqinezhad & Attar (2016) Phytotaxa 268(4) 286-290.                                                                                   |
| 436 | <i>Onosma iranshahrii</i> Ghahr. & Attar                      | Boraginaceae  | Ghahreman & Attar (1996) Iran. J. Bot. 7(1) 51-55.                                                                                    |
| 437 | <i>Onosma khorassanica</i> Attar & Joharchi                   | Boraginaceae  | Attar & Joharchi (2006) Rostaniha 7(suppl.2) 112-118.                                                                                 |
| 438 | <i>Onosma maculata</i> Ranjbar & Almasi                       | Boraginaceae  | Almasi & Ranjbar (2015) Nordic J. Bot. 33(5) 522-525.                                                                                 |
| 439 | <i>Onosma mozaffariani</i> Mehrabian                          | Boraginaceae  | Mehrabian et al. (2014) Feddes Repertorium 124 69679.                                                                                 |
| 440 | <i>Onosma sabalanica</i> Ponert                               | Boraginaceae  | Ponert (1975) Feddes Repertorium 86(9-10) 503-505.                                                                                    |
| 441 | <i>Onosma sheidaii</i> Mehrabian                              | Boraginaceae  | Mehrabian et al. (2014) Feddes Repertorium 124 69679.                                                                                 |
| 442 | <i>Opsicarpium insignis</i> Mozaff.                           | Apiaceae      | Mozaffarian (2003) Bot. Zhurn. (Moscow & Leningrad) 88(2) 93-94.<br>Bidarlord & Ghahremaninejad (2016) Ann. Bot. Fenn. 53(1-2) 69-72. |
| 443 | <i>Ornithogalum boissieri</i> Bidarlord & F.Ghahrem.          | Liliaceae     | Heidarnya et al. (2012) Iran J. Bot. 18(1) 47-54.                                                                                     |
| 444 | <i>Ornithogalum khuzestanicum</i> Heidaryan, Hamdi & Assadi   | Hyacinthaceae | Maroofi (2010) Iran. J. Bot. 16(1) 76-80.                                                                                             |
| 445 | <i>Ornithogalum sanandajense</i> Maroofi                      | Liliaceae     | Maassoumi (2013) Iran. J. Bot. 19(1) 1-28.                                                                                            |
| 446 | <i>Oxytropis bakhtiarica</i> Maassoumi                        | Fabaceae      | Maassoumi (2013) Iran. J. Bot. 19(1) 1-28.                                                                                            |
| 447 | <i>Oxytropis compacta</i> Maassoumi & Joharchi                | Fabaceae      | Maassoumi (2013) Iran. J. Bot. 19(1) 1-28.                                                                                            |
| 448 | <i>Oxytropis guilanica</i> Maassoumi & Moradi                 | Fabaceae      | Moradi et al. (2015) Iran. J. Bot. 21(1) 19-23.                                                                                       |
| 449 | <i>Oxytropis indurata</i> Maassoumi                           | Fabaceae      | Maassoumi (2013) Iran. J. Bot. 19(1) 1-28.                                                                                            |



|     |                                                    |                 |                                                                                   |
|-----|----------------------------------------------------|-----------------|-----------------------------------------------------------------------------------|
| 450 | <i>Oxytropis javaherdehi</i> Maassoumi             | Fabaceae        | Maassoumi (2013) Iran. J. Bot. 19(1) 1-28.                                        |
| 451 | <i>Oxytropis kordkoyensis</i> Maassoumi            | Fabaceae        | Maassoumi (2013) Iran. J. Bot. 19(1) 1-28.                                        |
| 452 | <i>Oxytropis mahneshanensis</i> Maassoumi          | Fabaceae        | Maassoumi (2013) Iran. J. Bot. 19(1) 1-28.                                        |
| 453 | <i>Oxytropis pseudosuavis</i> Maassoumi            | Fabaceae        | Maassoumi (2013) Iran. J. Bot. 19(1) 1-28.                                        |
| 454 | <i>Oxytropis rhodontha</i> Vassilcz.               | Fabaceae        | Vassilczenko (1988) Byull. Moskovsk. Obshch. Isp. Prir., Otd. Biol. 93(3) 97-102. |
| 455 | <i>Oxytropis rudbariensis</i> Vassilcz.            | Fabaceae        | Vassilczenko (1988) Byull. Moskovsk. Obshch. Isp. Prir., Otd. Biol. 93(3) 97-102. |
| 456 | <i>Oxytropis sabzavarensis</i> Maassoumi           | Fabaceae        | Maassoumi (2013) Iran. J. Bot. 19(1) 1-28.                                        |
| 457 | <i>Oxytropis salukensis</i> Maassoumi              | Fabaceae        | Maassoumi (2013) Iran. J. Bot. 19(1) 1-28.                                        |
| 458 | <i>Oxytropis shahvarica</i> Maassoumi              | Fabaceae        | Maassoumi (2013) Iran. J. Bot. 19(1) 1-28.                                        |
| 459 | <i>Oxytropis shirkuhi</i> Vassilcz.                | Fabaceae        | Vassilczenko (1988) Byull. Moskovsk. Obshch. Isp. Prir., Otd. Biol. 93(3) 97-102. |
| 460 | <i>Oxytropis sivehensis</i> Maassoumi & Amini Rad  | Fabaceae        | Maassoumi (2013) Iran. J. Bot. 19(1) 1-28.                                        |
| 461 | <i>Oxytropis surmandehi</i> Vassilcz.              | Fabaceae        | Vassilczenko (1988) Byull. Moskovsk. Obshch. Isp. Prir., Otd. Biol. 93(3) 97-102. |
| 462 | <i>Oxytropis yazdi</i> Vassilcz.                   | Fabaceae        | Vassilczenko (1988) Byull. Moskovsk. Obshch. Isp. Prir., Otd. Biol. 93(3) 97-102. |
| 463 | <i>Oxytropis zangolehensis</i> Vassilcz.           | Fabaceae        | Vassilczenko (1988) Byull. Moskovsk. Obshch. Isp. Prir., Otd. Biol. 93(3) 97-102. |
| 464 | <i>Paracaryum glandulosum</i> Khat.                | Boraginaceae    | Khatamsaz (1994) Iran. J. Bot. 6(2) 227-233.                                      |
| 465 | <i>Paracaryum khorassanicum</i> Khat.              | Boraginaceae    | Khatamsaz (1999) Iran. J. Bot. 8(1) 1-8.                                          |
| 466 | <i>Paronychia lordeganica</i> Dinarvand & Assadi   | Caryophyllaceae | Dinarvand (2008) Iran. J. Bot. 14(1) 10-12.                                       |
| 467 | <i>Pentanema kurdistanicum</i> Marrofi & Ghaderi   | Asteraceae      | Marrofi & Ghaderi (2016) Phytotaxa 253(3) 223-226.                                |
| 468 | <i>Phlomoides kermanica</i> Ranjbar & C.Mahmoudi   | Lamiaceae       | Ranjbar & Mohammadi (2015) Webbia 70(2) 237-245.                                  |
| 469 | <i>Piptatherum denaense</i> Hamzehee & Assadi      | Poaceae         | Hamzehee & Assadi (2015) Iran. J. Bot. 21(1) 01-09.                               |
| 470 | <i>Poa demavandica</i> Assadi & Kavousi            | Poaceae         | Kavousi et al. (2009) Iran. J. Bot. 15(1) 57-60.                                  |
| 471 | <i>Polygonum botuliforme</i> Mozaff.               | Polygonaceae    | Mozaffarian (1988) Iran. J. Bot. 4(1) 61-70.                                      |
| 472 | <i>Polygonum iranicum</i> Mozaff.                  | Polygonaceae    | mozaffarian (2012) Iran.J.Bot.18(2) 159-174.                                      |
| 473 | <i>Potentilla schiraziana</i> Khat.                | Rosaceae        | Khatansaz (1987) Iran. J. Bot. 3(2) 89-94.                                        |
| 474 | <i>Psephellus khalkhalensis</i> Ranjbar & Negaresh | Asteraceae      | Ranjbar & Negaresh (2014) Phytotaxa 170(3) 199-206.                               |

|     |                                                         |                 |                                                      |
|-----|---------------------------------------------------------|-----------------|------------------------------------------------------|
| 475 | <i>Pyncocycla bashagardiana</i> Mozaff.                 | Apiaceae        | Mozaffarian (1985) Iran. J. Bot. 3(1) 81-86.         |
| 476 | <i>Pyrus kandevarica</i> Ghahr., Khat. & Mozaff.        | Rosaceae        | Khatamsaz (1989) Iran. J. Bot. 5(1) 1-5.             |
| 477 | <i>Ranunculus microflorus</i> Pakravan                  | Ranunculaceae   | Pakravan (2012) Scienceasia 38 419-421.              |
| 478 | <i>Rheum austroiranicum</i> Taheri & Assadi             | Polygonaceae    | Taheri & Assadi (2013) Rostaniha 14(1) 85-93.        |
| 479 | <i>Rheum iranshahrii</i> Taheri & Assadi                | Polygonaceae    | Taheri & Assadi (2013) Rostaniha 14(1) 85-93.        |
| 480 | <i>Rheum kordestanicum</i> Taheri & Assadi              | Polygonaceae    | Taheri & Assadi (2013) Rostaniha 14(1) 85-93.        |
| 481 | <i>Rheum neyshabourense</i> Baradaran & Jafari          | Polygonaceae    | Baradaran & Jafari (2014) Nordic J. Bot. 32 7236725. |
| 482 | <i>Ribes khorasanicum</i> Saghafi & Assadi              | Grossulariaceae | Saghafi & Assadi (1996) Iran. J. Bot. 7(1) 11-14.    |
| 483 | <i>Rochelia retrosepala</i> Khat.                       | Boraginaceae    | Khatamsaz (2001) Iran. J. Bot. 9(1) 73-77.           |
| 484 | <i>Rosa abrica</i> Khat. & Koobaz                       | Rosaceae        | Koobaz et al. (2011) Rostaniha 12(1) 51-62.          |
| 485 | <i>Salicornia iranica</i> Akhani                        | Chenopodiaceae  | Akhani (2008) Pak. J. Bot. 40(4) 1635-1655.          |
| 486 | <i>Salicornia persica</i> Akhani                        | Chenopodiaceae  | Akhani (2008) Pak. J. Bot. 40(4) 1635-1655.          |
| 487 | <i>Salicornia persopolitana</i> Akhani                  | Chenopodiaceae  | Akhani (2008) Pak. J. Bot. 40(4) 1635-1655.          |
| 488 | <i>Salicornia sinus-persica</i> Akhani                  | Chenopodiaceae  | Akhani (2008) Pak. J. Bot. 40(4) 1635-1655.          |
| 489 | <i>Salix baladehensis</i> Maassoumi, Moeeni & Rahimin.  | Salicaceae      | Maassoumi et al. (2008) Iran. J. Bot. 14(1) 1-6.     |
| 490 | <i>Salix elymaitica</i> Maassoumi                       | Salicaceae      | Maassoumi (2009) Iran. J. Bot. 15(1) 3-20.           |
| 491 | <i>Salix firouzkuhensis</i> Maassoumi                   | Salicaceae      | Maassoumi (2009) Iran. J. Bot. 15(1) 3-20.           |
| 492 | <i>Salix issatissensis</i> Maassoumi, Moeeni & Rahimin. | Salicaceae      | Maassoumi et al. (2008) Iran. J. Bot. 14(1) 1-6.     |
| 493 | <i>Salix lacus-tari</i> Maassoumi & Kazempour           | Salicaceae      | Maassoumi (2009) Iran. J. Bot. 15(1) 3-20.           |
| 494 | <i>Salix viridiformis</i> Maassoumi                     | Salicaceae      | Maassoumi (2009) Iran. J. Bot. 15(1) 3-20.           |
| 495 | <i>Salsola abarghuensis</i> Assadi                      | Chenopodiaceae  | Assadi (1984) Iran. J. Bot. 2(2) 125-148.            |
| 496 | <i>Salsola austro-iranica</i> Akhani                    | Chenopodiaceae  | Akhani (2015) Pl. Veg. N. W. Persian Gulf 286.       |
| 497 | <i>Salsola yazdiana</i> Assadi                          | Chenopodiaceae  | Assadi (1984) Iran. J. Bot. 2(2) 125-148.            |
| 498 | <i>Salvia jamzadii</i> Mozaff.                          | Lamiaceae       | Mozaffarian (1991) Iran. J. Bot. 5(1) 29-39.         |
| 499 | <i>Salvia shahkuhmahalei</i> Akhani                     | Lamiaceae       | Akhani et al. (2016) Phytotaxa 249(1) 159-180.       |
| 500 | <i>Saponaria esfandiarrii</i> Assadi                    | Caryophyllaceae | Assadi (1989) Iran. J. Bot. 4(2) 197-204.            |
| 501 | <i>Saponaria iranica</i> Dashti, Assadi & Sharifnia     | Caryophyllaceae | Dashti et al. (2014) Iran. J. Bot. 20(2) 146-151.    |
| 502 | <i>Satureja avromanica</i> Maroofi                      | Lamiaceae       | Maroofi (2010) Iran. J. Bot. 16(1) 76-80.            |
| 503 | <i>Satureja kallarica</i> Jamzad                        | Lamiaceae       | Jamzad (1991) Iran. J. Bot. 5(2) 69-74.              |

|     |                                                         |                  |                                                                                                             |
|-----|---------------------------------------------------------|------------------|-------------------------------------------------------------------------------------------------------------|
| 504 | <i>Satureja kermanshahensis</i> Jamzad                  | Lamiaceae        | Jamzad (2010) Iran. J. Bot. 16(2) 213-217.                                                                  |
| 505 | <i>Satureja khuzistanica</i> Jamzad                     | Lamiaceae        | Jamzad (1994) Iran. J. Bot. 6(2) 215-218.                                                                   |
| 506 | <i>Saxifraga ramsarica</i> Jamzad                       | Saxifragaceae    | Jamzad (1993) Iran. J. Bot. 6(1) 137-141.                                                                   |
| 507 | <i>Scabiosa esfandiarii</i> Jamzad                      | Dipsacaceae      | Jamzad (1989) Iran. J. Bot. 4(2) 183-188.                                                                   |
| 508 | <i>Scrophularia alhagiooides</i> Attar & Joharchi       | Scrophulariaceae | Attar et al. (2006) Iran. J. Bot. 12(2) 193-202.                                                            |
| 509 | <i>Scrophularia crassipedunculata</i> Attar & Joharchi  | Scrophulariaceae | Attar et al. (2006) Iran. J. Bot. 12(2) 193-202.                                                            |
| 510 | <i>Scrophularia denaensis</i> Attar                     | Scrophulariaceae | Attar (2006) Iran. J. Bot. 12(2) 136-143.                                                                   |
| 511 | <i>Scrophularia elymaitica</i> Mozaff.                  | Scrophulariaceae | Mozaffarian (2010) Iran. J. Bot. 16(2) 204-212.                                                             |
| 512 | <i>Scrophularia ghahremanii</i> Attar & Hamzehee        | Scrophulariaceae | Attar & Hamzehee (2006) Frddes Repertorium 117 5086511.                                                     |
| 513 | <i>Scrophularia iranica</i> Attar                       | Scrophulariaceae | Attar (2006) Iran. J. Bot. 12(2) 136-143.                                                                   |
| 514 | <i>Scrophularia ispanhanica</i> Attar & Nowrouzi        | Scrophulariaceae | Attar et al. (2006) Iran. J. Bot. 12(2) 193-202.                                                            |
| 515 | <i>Scrophularia kermanica</i> Ghahr. & Mirtadz.         | Scrophulariaceae | Ghahreman & Mirtadzadini (2000) Iran. J. Bot. 8(2) 245-250.                                                 |
| 516 | <i>Scrophularia khorassanica</i> Attar & Joharchi       | Scrophulariaceae | Attar et al. (2006) Iran. J. Bot. 12(2) 193-202.                                                            |
| 517 | <i>Scrophularia papyracea</i> Attar                     | Scrophulariaceae | Attar (2006) Iran. J. Bot. 12(2) 136-143.                                                                   |
| 518 | <i>Scrophularia schiraziana</i> Attar & Hatami          | Scrophulariaceae | Attar et al. (2006) Iran. J. Bot. 12(2) 193-202.                                                            |
| 519 | <i>Scrophularia shulabadensis</i> Attar & Hamzehee      | Scrophulariaceae | Attar & Hamzehee (2006) Frddes Repertorium 117 5086511.                                                     |
| 520 | <i>Scrophularia tortuosissima</i> Attar & Joharchi      | Scrophulariaceae | Attar et al. (2006) Iran. J. Bot. 12(2) 193-202.                                                            |
| 521 | <i>Sedum elburzense</i> Akhiani & Assadi                | Crassulaceae     | Akhiani & Assadi (2000) Iran. J. Bot. 8(2) 163-166.                                                         |
| 522 | <i>Senecio eligulatus</i> B.Nord., Moussavi & Djavadi   | Asteraceae       | Nordestam et al. (2002) Compositae Newsl 38 42-46.                                                          |
| 523 | <i>Senecio subnivalis</i> Ajani, Noroozi & Nord.        | Asteraceae       | Noroozi et al. (2010) Compositae Newsl 48 43-62.                                                            |
| 524 | <i>Serratula calcarea</i> Mozaff.                       | Rubiaceae        | Mozaffarian (2006) Iran. J. Bot. 107-113.<br>Gholipour & Parsa Khanghah (2015) Iran. J. Bot. 21(2) 118-122. |
| 525 | <i>Silene mishudaghensis</i> Gholipour & Parsa Khanghah | Caryophyllaceae  |                                                                                                             |
| 526 | <i>Sisymbrium kermanicum</i> Khodash. & Mirtadz.        | Brassicaceae     | Khodashenas et al. (2006) Iran. J. Bot. 12(1) 94-96.                                                        |
| 527 | <i>Solenanthes bakhtiaricus</i> Khat.                   | Boraginaceae     | Khatamsaz (1999) Iran. J. Bot. 8(1) 1-8.                                                                    |
| 528 | <i>Sorbus tiliifolia</i> H.Zare, Amini & Assadi         | Rosaceae         | Zare et al. (2004) Iran. J. Bot. 10(2) 147-151.                                                             |
| 529 | <i>Spiraea sheikhii</i> H.Zare                          | Rosaceae         | Zare (2002) Iran. J. Bot. 9(2) 253-255.                                                                     |
| 530 | <i>Suaeda iranshahrii</i> Akhani & Freitag              | Chenopodiaceae   | Freitag et al. (2013) Rostaniha 14(1) 68-80 .                                                               |
| 531 | <i>Suaeda khalijsfarsica</i> Akhani                     | Chenopodiaceae   | Akhani (2015) Pl. Veg. N. W. Persian Gulf 292.                                                              |

|     |                                                            |                  |                                                      |
|-----|------------------------------------------------------------|------------------|------------------------------------------------------|
| 532 | <i>Tanacetum bachtiaricum</i> Mozaff.                      | Asteraceae       | Mozaffarian (2005) Iran. J. Bot. 11(1) 115-127.      |
| 533 | <i>Tanacetum elbursense</i> Mozaff.                        | Asteraceae       | Mozaffarian (2005) Iran. J. Bot. 11(1) 115-127.      |
| 534 | <i>Tanacetum sonbolii</i> Mozaff.                          | Asteraceae       | Mozaffarian (2005) Iran. J. Bot. 11(1) 115-127.      |
| 535 | <i>Taverniera echinata</i> Mozaff.                         | Fabaceae         | Mozaffarian (1988) Iran. J. Bot. 4(1) 61-70.         |
| 536 | <i>Thlaspi maassoumii</i> Mozaff.                          | Brassicaceae     | Mozaffarian (1996) Iran. J. Bot. 7(1) 127-142.       |
| 537 | <i>Thlaspi pulvinata</i> Mozaff.                           | Brassicaceae     | Mozaffarian (1996) Iran. J. Bot. 7(1) 127-142.       |
| 538 | <i>Thymus marandensis</i> Jamzad                           | Lamiaceae        | Jamzad (2009) Iran. J. Bot. 15 (1) 51-56.            |
| 539 | <i>Tilia sabetii</i> H.Zare                                | Tiliaceae        | Zare et al. (2012) Iran. J. Bot. 18(2) 175-190.      |
| 540 | <i>Tilia stellatopilosa</i> H.Zare, Amini & Assadi         | Tiliaceae        | Zare et al. (2012) Iran. J. Bot. 18(2) 175-190.      |
| 541 | <i>Tragopogon kurdicus</i> Safavi & Maroofi                | Asteraceae       | Safavi & Maroofi (2014) Iran. J. Bot. 20(1) 05-07.   |
| 542 | <i>Trichodesma elymaiticum</i> Mozaff.                     | Asteraceae       | Mozaffarian (2008) Iran. J. Bot. 14(2) 87-94.        |
| 543 | <i>Trigonella bakhtiarica</i> Ranjbar & Z.Hajmoradi        | Fabaceae         | Ranjbar & Hajmoradi (2015) Phytotaxa 202(1) 26-34.   |
| 544 | <i>Tulipa wendelboi</i> Matin & Iranshahr                  | Liliaceae        | Matin & Iranshahr (1998) Iran. J. Bot. 7(2) 227-229. |
| 545 | <i>Verbascum albidiflorum</i> Ranjbar & Nouri              | Scrophulariaceae | Ranjbar & Nouri (2015) Willdenowia 45(1) 147-155.    |
| 546 | <i>Verbascum scoparium</i> Mozaff.                         | Scrophulariaceae | Mozaffarian (1988) Iran. J. Bot. 4(1) 61-70.         |
| 547 | <i>Verbascum shahsavarensis</i> Sotoodeh, Attar & Civeyrel | Scrophulariaceae | Sotoodeh et al. (2015) Phytotaxa 203(1) 76-80.       |
| 548 | <i>Vicia kurdica</i> Jalilian                              | Fabaceae         | Jalilian et al. (2010) Feddes Repertorium 121 81684. |
| 549 | <i>Vincetoxicum assadii</i> Zaeifi                         | Asclepiadaceae   | Zaeifi (1999) Iran. J. Bot. 8(1) 105-110.            |
| 550 | <i>Vincetoxicum mozaffarianii</i> Zaeifi                   | Asclepiadaceae   | Zaeifi (1999) Iran. J. Bot. 8(1) 105-110.            |
